# Supplementary material for: Recompleting the Caenorhabditis elegans genome
Source: HighWire-hosted journal article supplement (doi:10.1101/gr.244830.118), 2019-05-23

|                                                  |                         |
|--------------------------------------------------|-------------------------|
| Assembler, read set, and<br>contig with an error | FALCON, PacBio, 000005F |
|--------------------------------------------------|-------------------------|

|         |            |           |           |
|---------|------------|-----------|-----------|
| Revised | chromosome | start     | end       |
| region  | chr1       | 4,400,693 | 4,425,111 |

Many of alignments terminate at the two arrowed regions, which suggests an assembly error. The revised contig perfectly matched the ce10 reference in the x-axis.

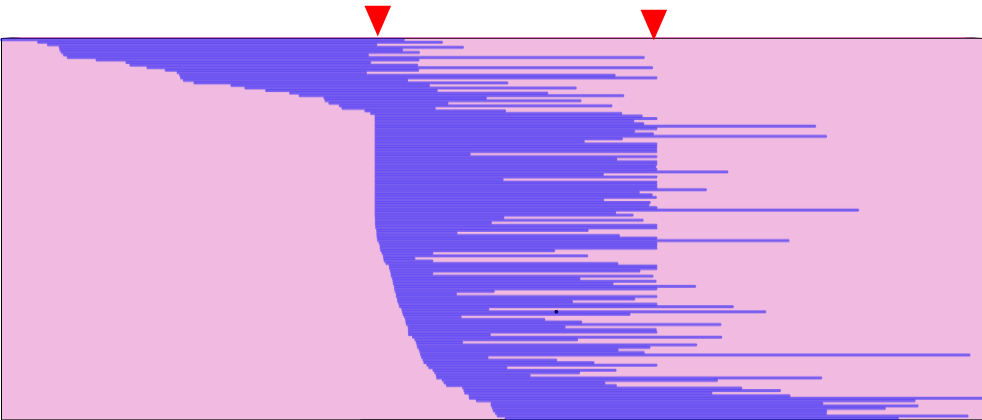

Corresponding region in ce10

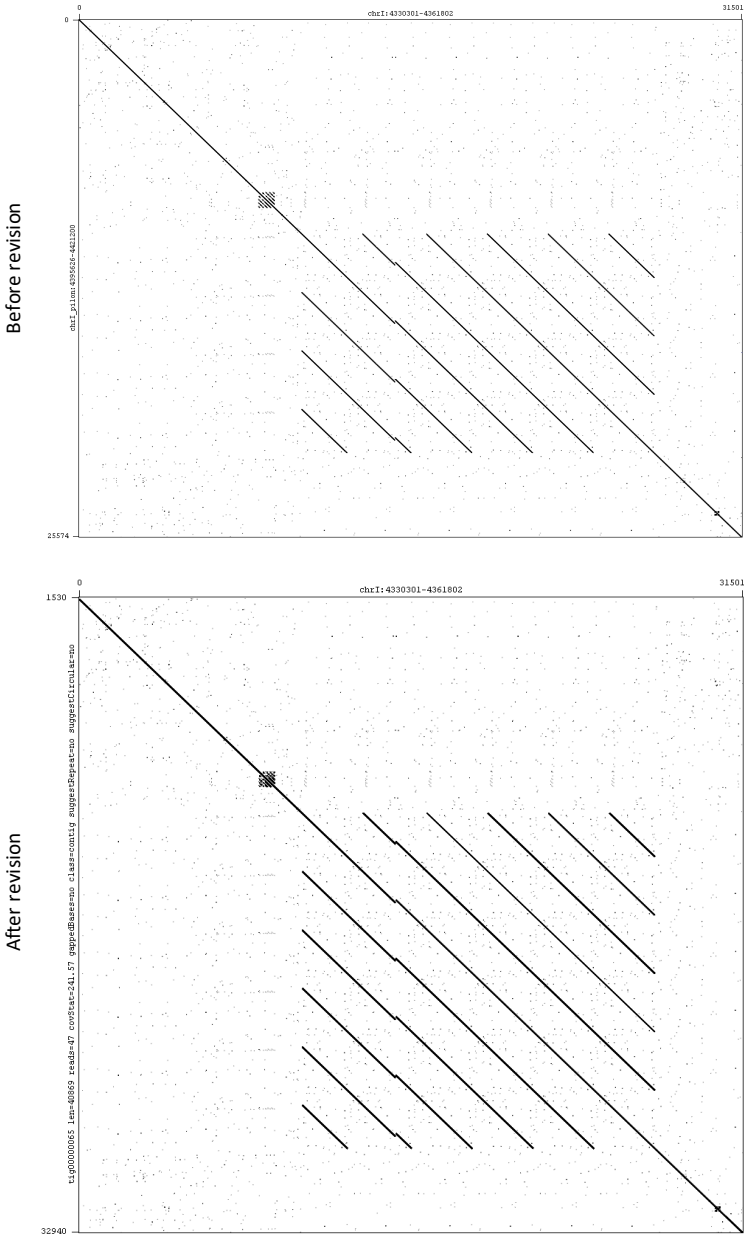

|                                                  |                                               |
|--------------------------------------------------|-----------------------------------------------|
| Assembler, read set, and<br>contig with an error | miniasm, PacBio,<br>vc2010.miniasm.quiver.002 |
|--------------------------------------------------|-----------------------------------------------|

| Revised | chromosome | start     | end       |
|---------|------------|-----------|-----------|
| region  | chrII      | 3,352,028 | 3,360,235 |

Alignments of raw reads to the focal VC2010 contig are partial in the arrowed region, implying the presence of an undesirable region in the contig. Indeed, the contig before revision has false positive duplicated regions, while the revised contig perfectly matched the ce10 reference in the x-axis.

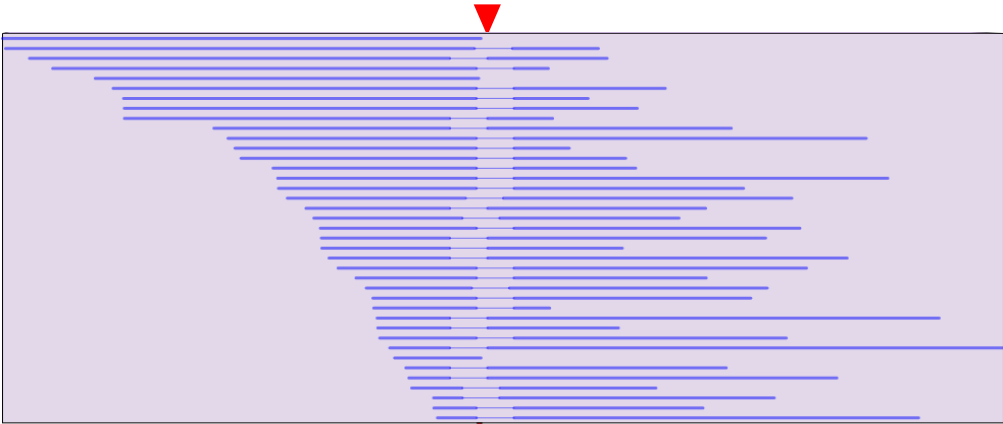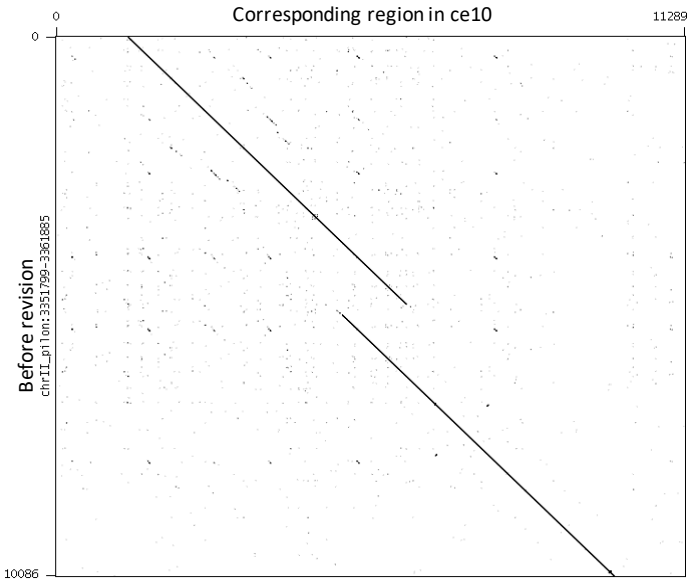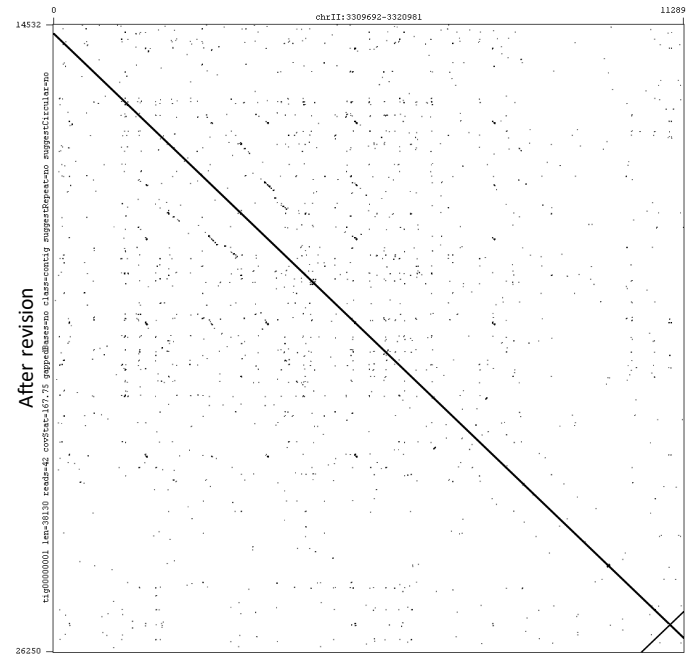

|                                                  |                                               |
|--------------------------------------------------|-----------------------------------------------|
| Assembler, read set, and<br>contig with an error | miniasm, PacBio,<br>vc2010.miniasm.quiver.002 |
|--------------------------------------------------|-----------------------------------------------|

| Revised | chromosome | start     | end       |
|---------|------------|-----------|-----------|
| region  | chrII      | 3,622,561 | 3,634,897 |

Blue disks in the arrowed region show insertions into the contig, implying a missing part in the VC2010 genome. Indeed, the contig before revision had a missing part, and the revised contig perfectly matched the ce10 reference.

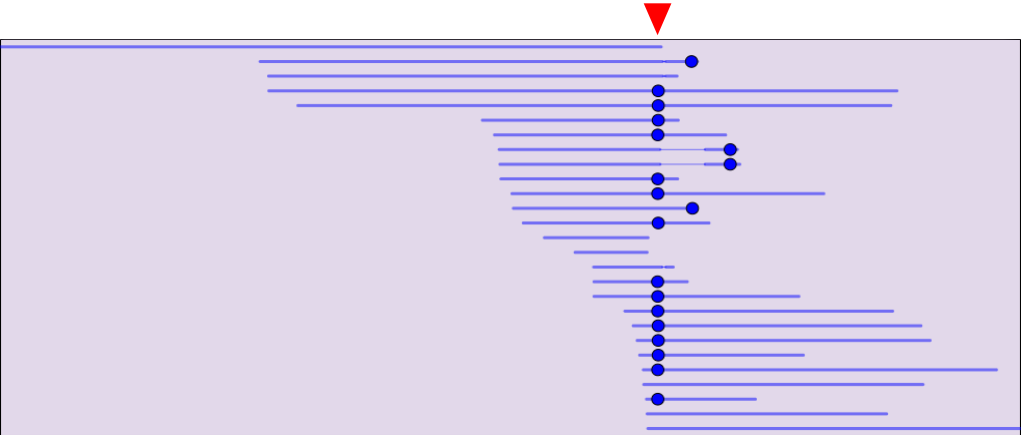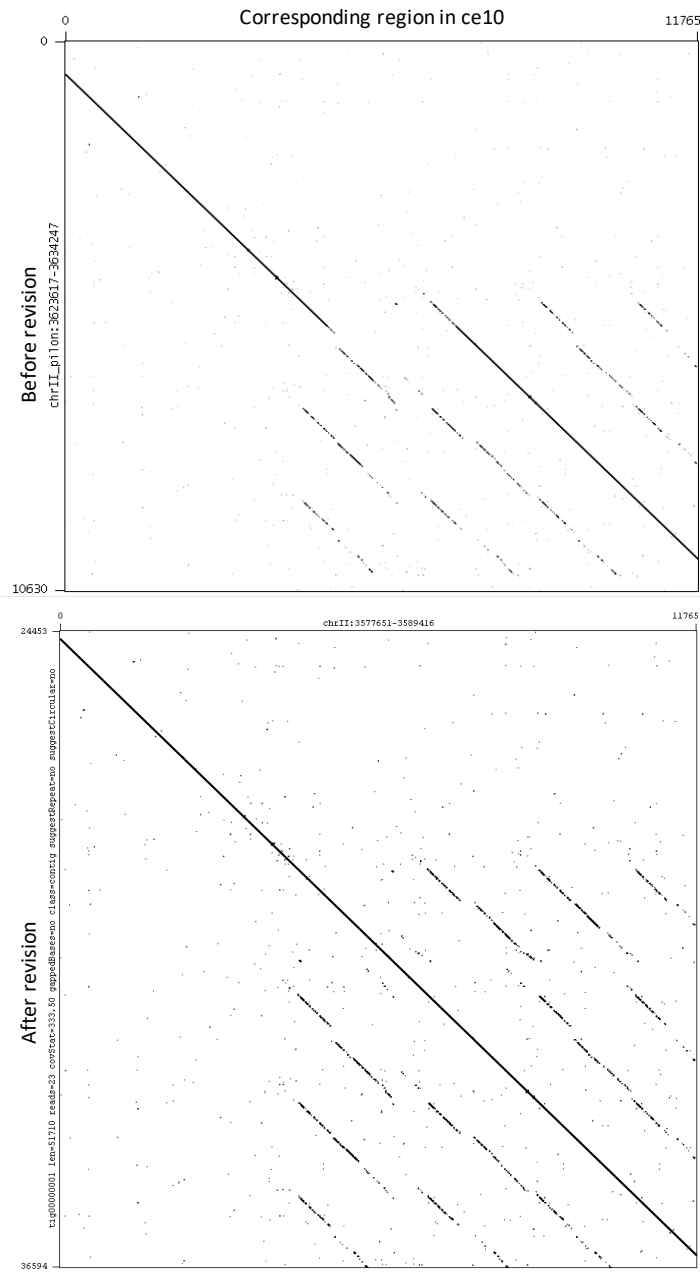

|                                                  |                                               |
|--------------------------------------------------|-----------------------------------------------|
| Assembler, read set, and<br>contig with an error | miniasm, PacBio,<br>vc2010.miniasm.quiver.002 |
|--------------------------------------------------|-----------------------------------------------|

| Revised | chromosome | start     | end       |
|---------|------------|-----------|-----------|
| region  | chrII      | 3,754,297 | 3,765,576 |

Blue disks in the arrowed region show insertions into the contig, implying a missing part in the VC2010 genome. Indeed, the contig before revision had a missing part, and the revised contig perfectly matched the ce10 reference.

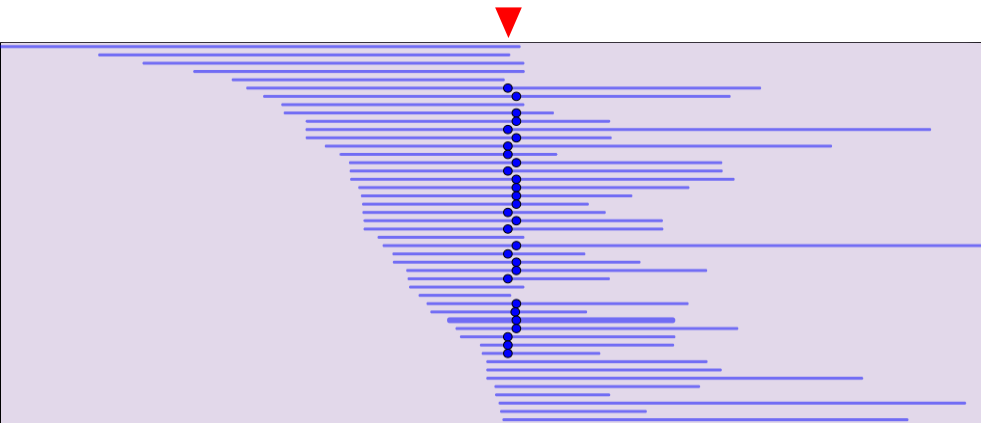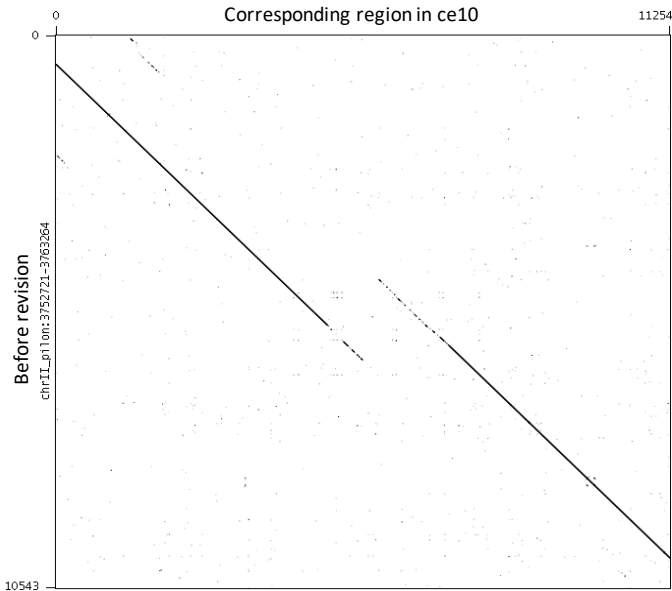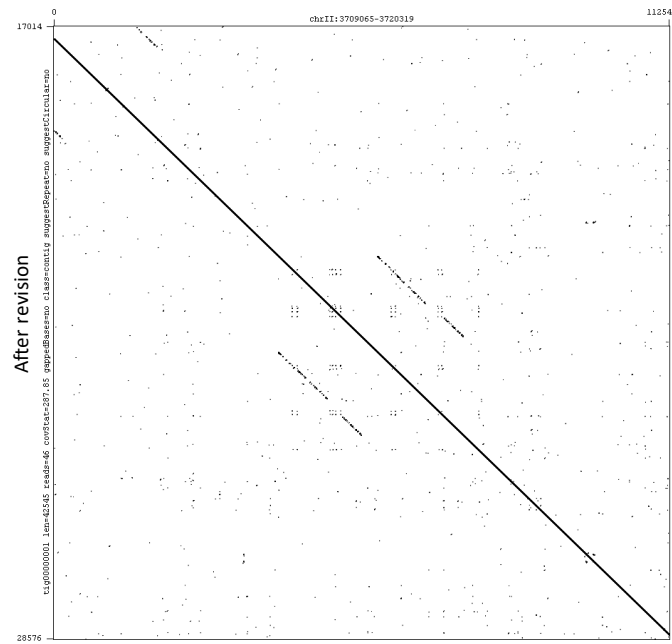

|                                                  |                                               |
|--------------------------------------------------|-----------------------------------------------|
| Assembler, read set, and<br>contig with an error | miniasm, PacBio,<br>vc2010.miniasm.quiver.017 |
|--------------------------------------------------|-----------------------------------------------|

| Revised | chromosome | start     | end       |
|---------|------------|-----------|-----------|
| region  | chrII      | 9,919,928 | 9,926,945 |

Alignments of raw reads to the focal VC2010 contig are partial in the arrowed region, implying the presence of an undesirable region in the contig. Indeed, the contig before revision has false positive duplicated regions, while the revised contig perfectly matched the ce10 reference in the x-axis.

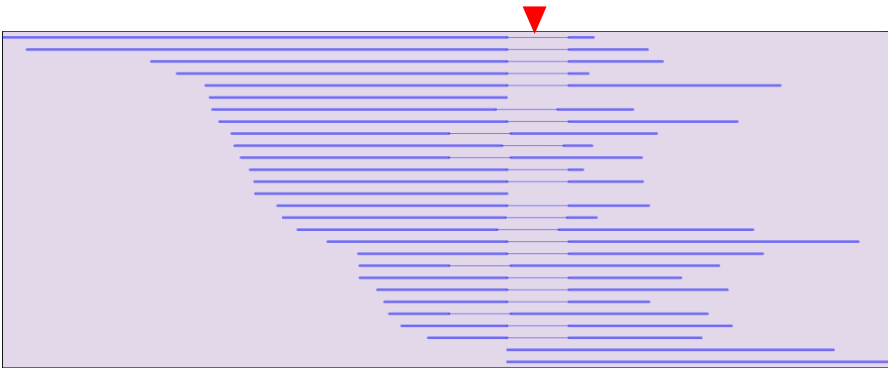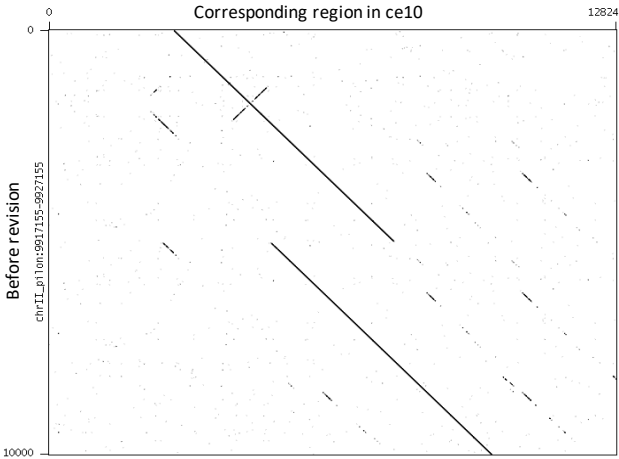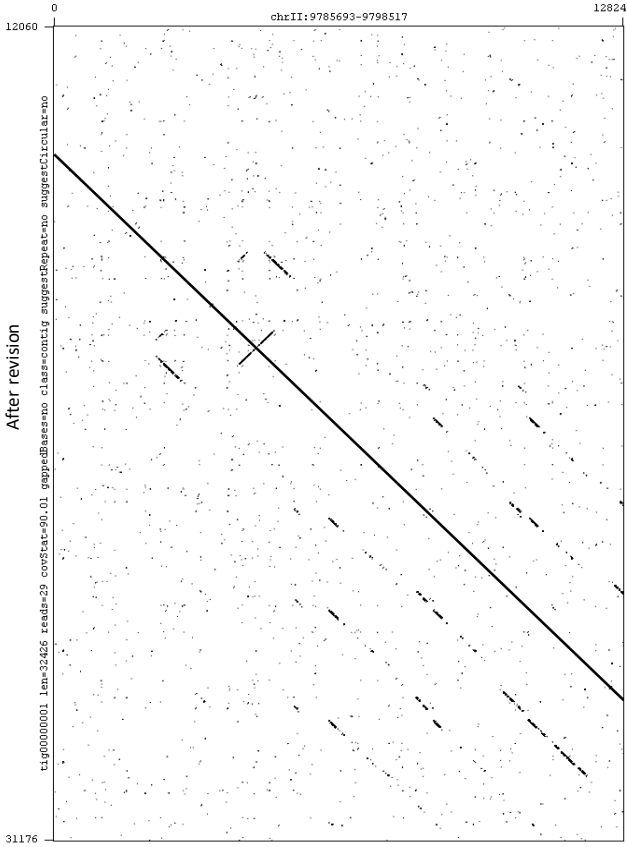

|                                               |                                            |
|-----------------------------------------------|--------------------------------------------|
| Assembler, read set, and contig with an error | miniasm, PacBio, vc2010.miniasm.quiver.022 |
|-----------------------------------------------|--------------------------------------------|

|         |            |           |           |
|---------|------------|-----------|-----------|
| Revised | chromosome | start     | end       |
| region  | chrIII     | 6,742,995 | 6,758,773 |

Blue disks in the arrowed regions show insertions into the contig, implying a missing part in the VC2010 genome. The revised contig had a tandem repeat expansion longer than that in the ce10 reference in the x-axis.

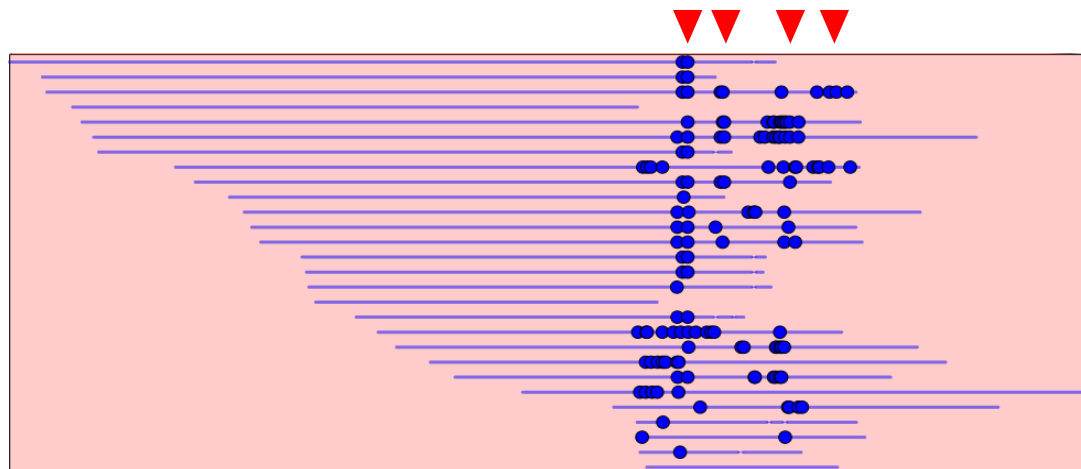

Corresponding region in ce10

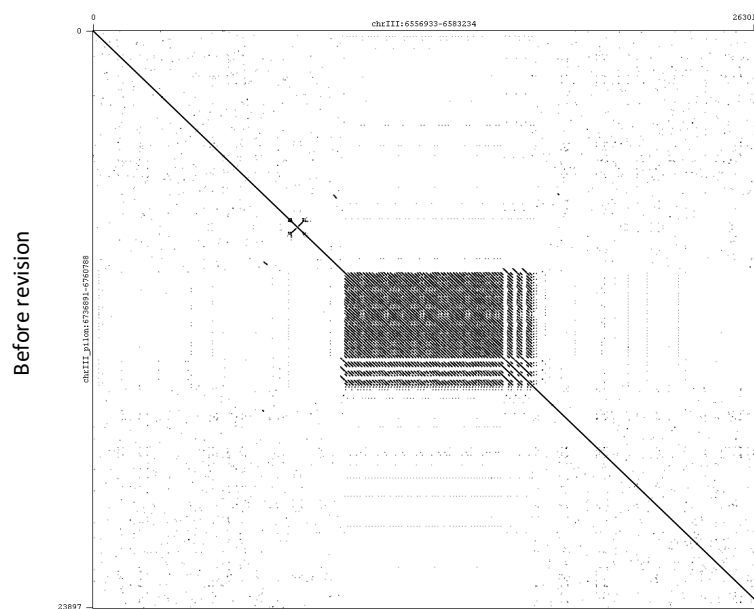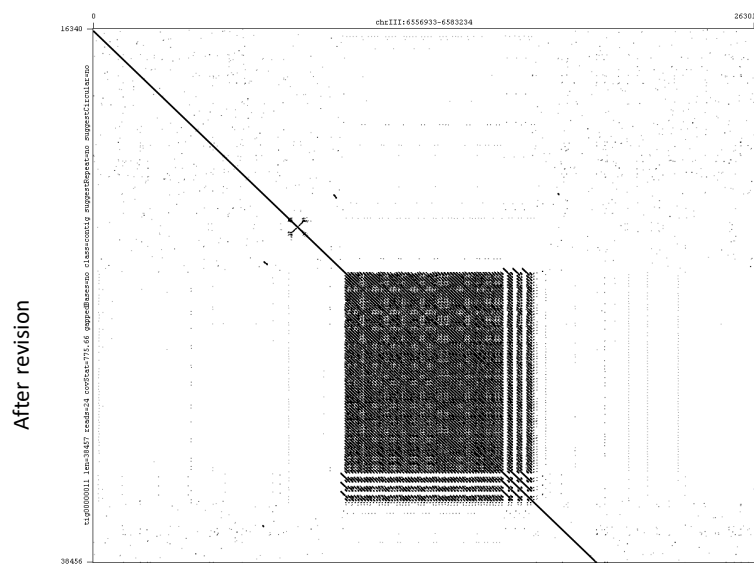

|                                                  |                                               |
|--------------------------------------------------|-----------------------------------------------|
| Assembler, read set, and<br>contig with an error | miniasm, PacBio,<br>vc2010.miniasm.quiver.003 |
|--------------------------------------------------|-----------------------------------------------|

| Revised | chromosome | start      | end        |
|---------|------------|------------|------------|
| region  | chrIII     | 11,895,171 | 11,908,856 |

Blue disks in the arrowed region show insertions into the contig, implying a missing part in the VC2010 genome. The revised contig had a tandem repeat expansion slightly shorter than that in the ce10 reference.

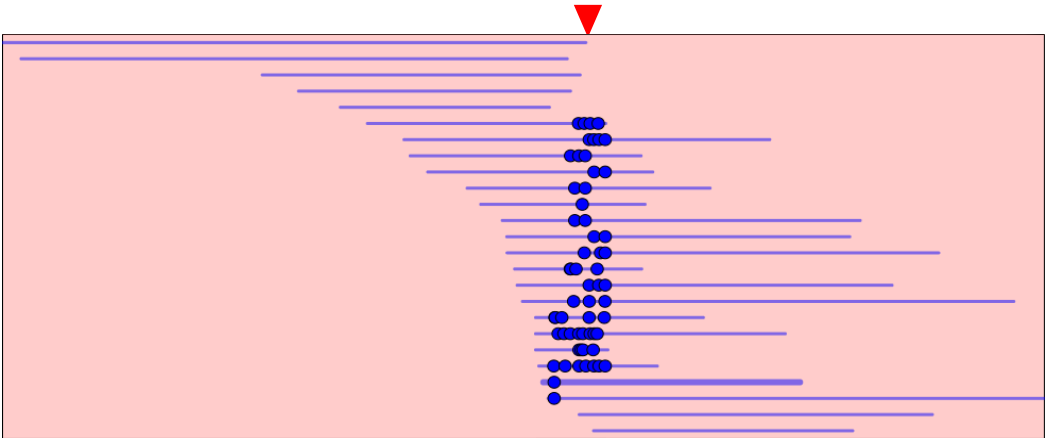

Corresponding region in ce10

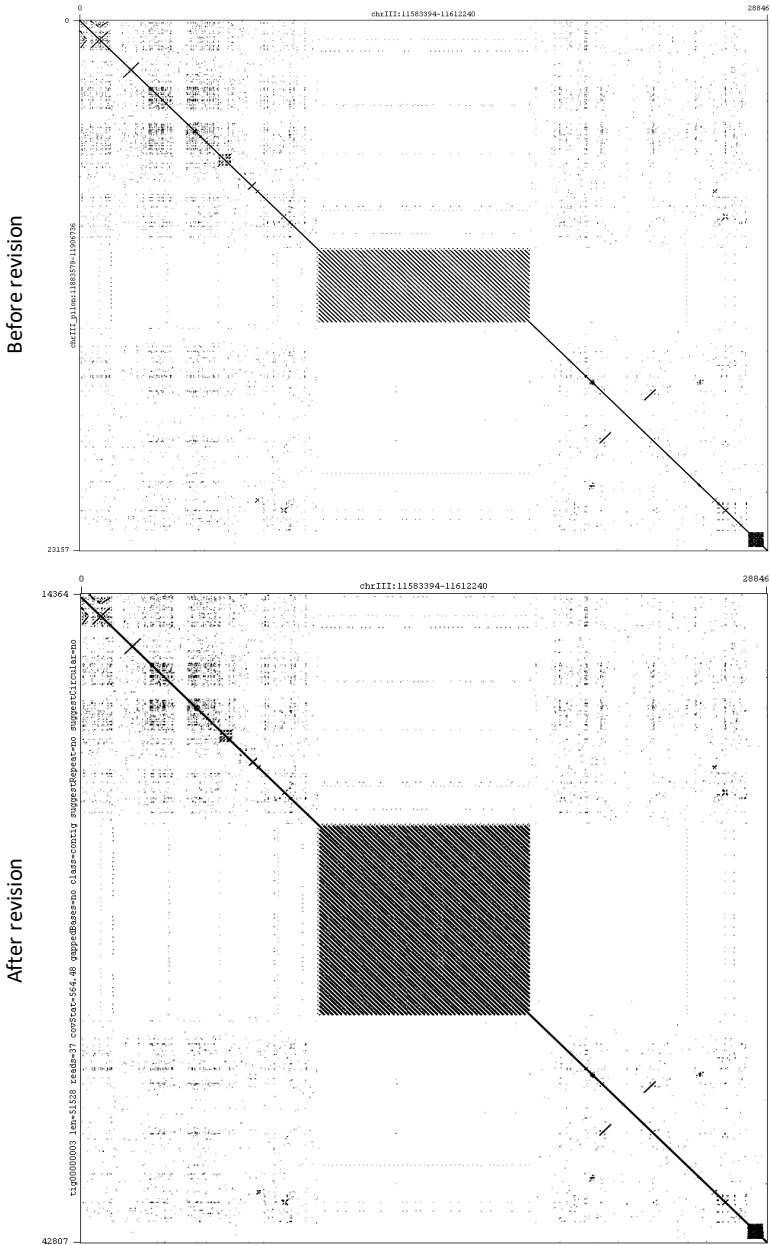

|                                                  |                                               |
|--------------------------------------------------|-----------------------------------------------|
| Assembler, read set, and<br>contig with an error | miniasm, PacBio,<br>vc2010.miniasm.quiver.003 |
|--------------------------------------------------|-----------------------------------------------|

| Revised | chromosome | start      | end        |
|---------|------------|------------|------------|
| region  | chrIII     | 13,332,333 | 13,339,443 |

Blue disks in the arrowed region show insertions into the contig, implying a missing part in the VC2010 genome. The revised contig had a tandem repeat expansion longer than that in the ce10 reference.

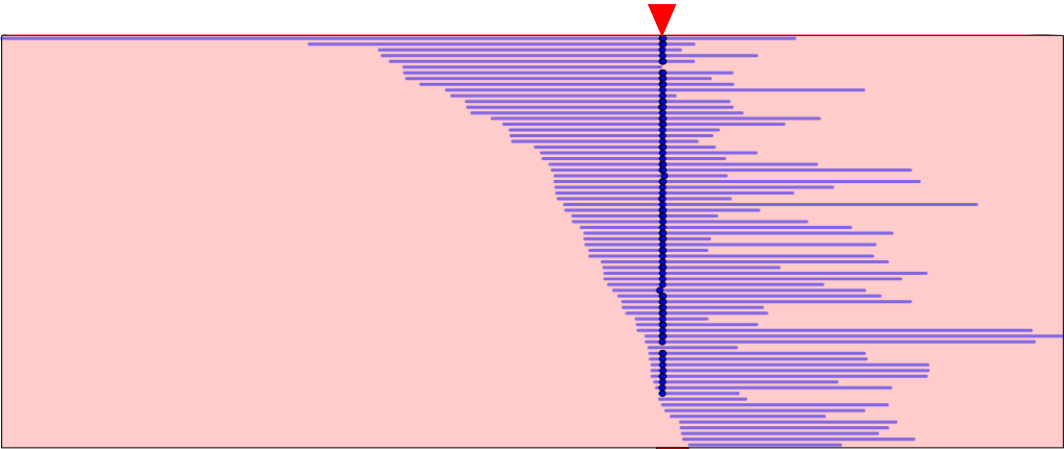

Corresponding region in ce10

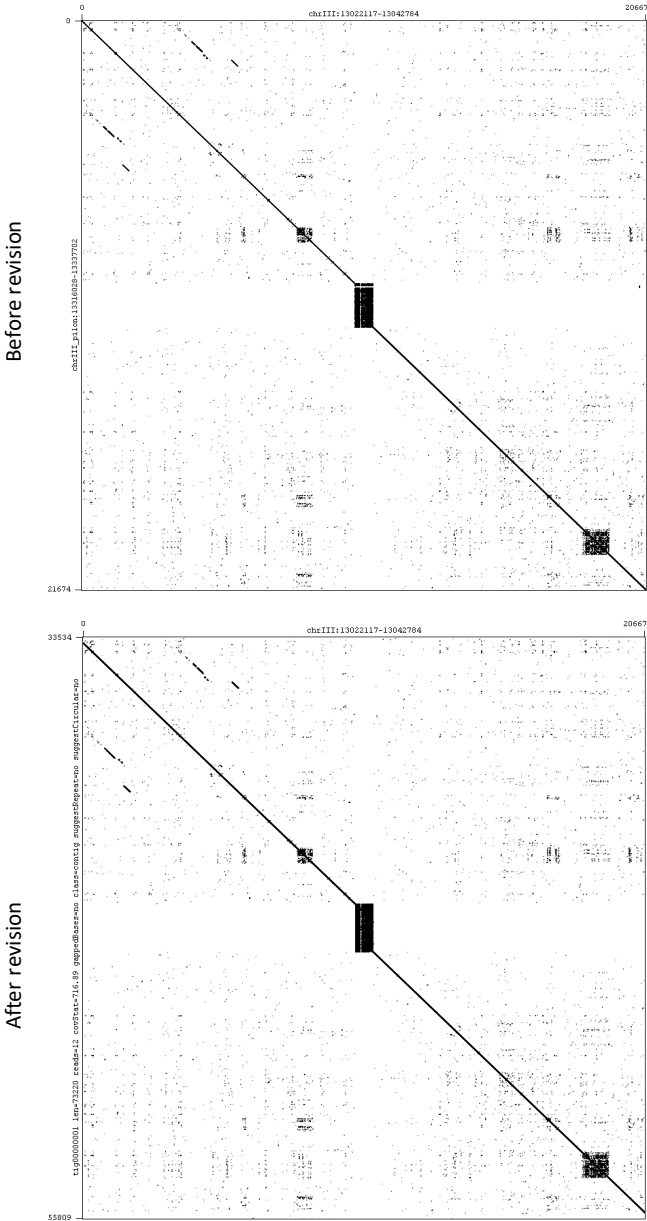



|                                                  |                                               |
|--------------------------------------------------|-----------------------------------------------|
| Assembler, read set, and<br>contig with an error | miniasm, PacBio,<br>vc2010.miniasm.quiver.003 |
|--------------------------------------------------|-----------------------------------------------|

| Revised | chromosome | start      | end        |
|---------|------------|------------|------------|
| region  | chrIII     | 13,725,597 | 13,736,906 |

Blue disks in the arrowed region show insertions into the contig, implying a missing part in the VC2010 genome. The revised contig is identical to its corresponding region in the N2 genome and has separated tandem repeat expansions.

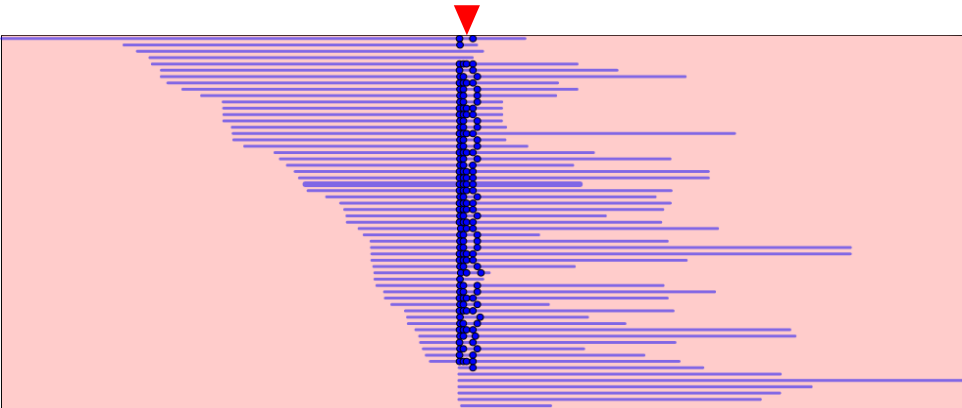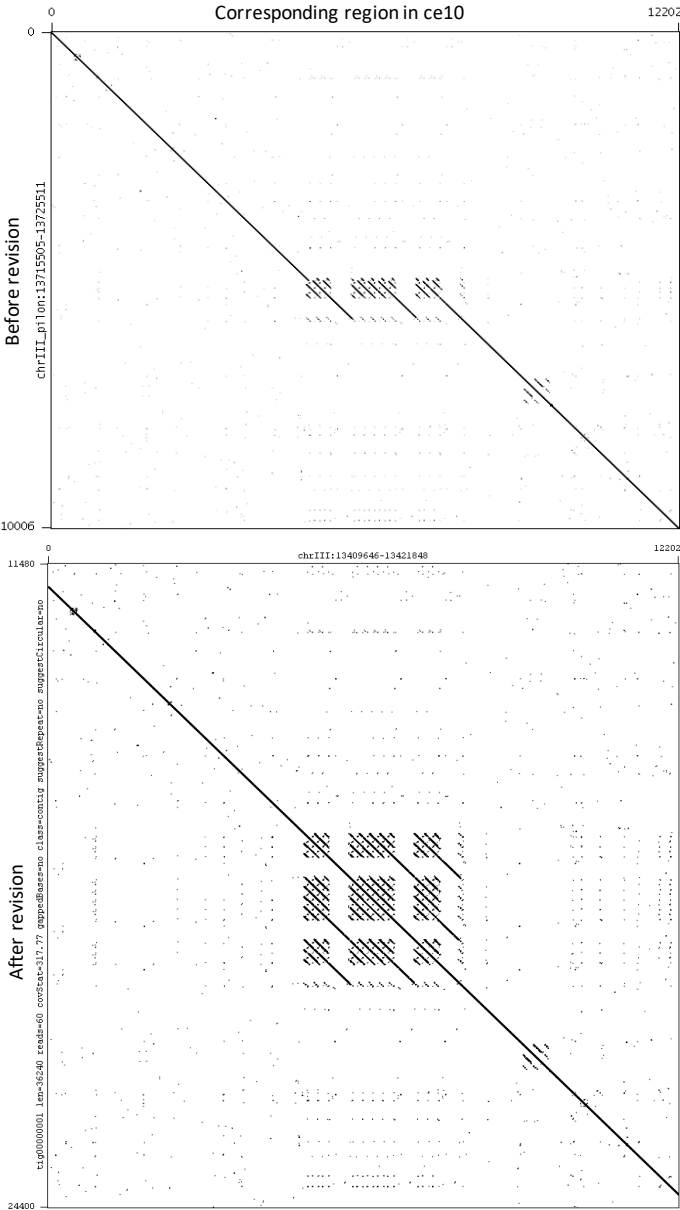

|                                                  |                                               |
|--------------------------------------------------|-----------------------------------------------|
| Assembler, read set, and<br>contig with an error | miniasm, PacBio,<br>vc2010.miniasm.quiver.006 |
|--------------------------------------------------|-----------------------------------------------|

| Revised | chromosome | start     | end       |
|---------|------------|-----------|-----------|
| region  | chrIV      | 6,063,597 | 6,071,178 |

Alignments of raw reads to the focal VC2010 contig are partial in the arrowed region, implying the presence of an undesirable region in the contig. Indeed, the contig before revision has false positive duplicated regions, while the revised contig perfectly matched the ce10 reference in the x-axis.

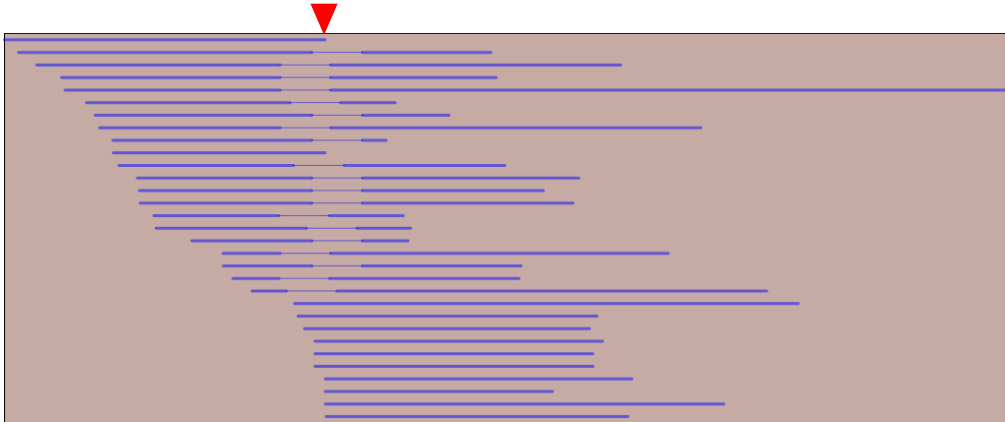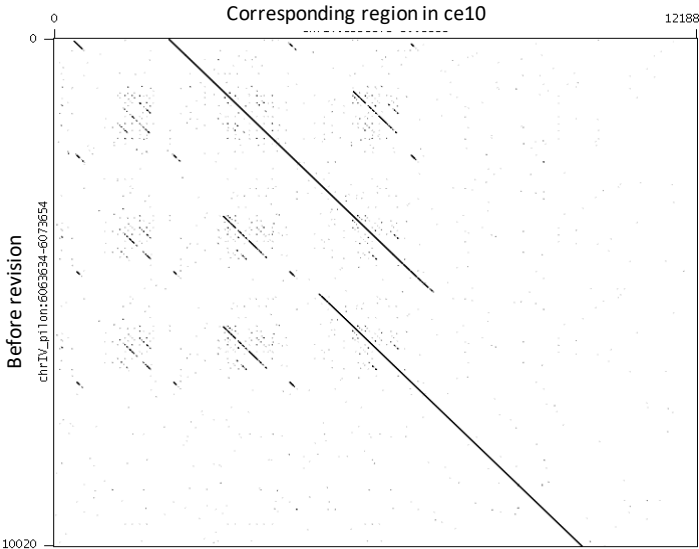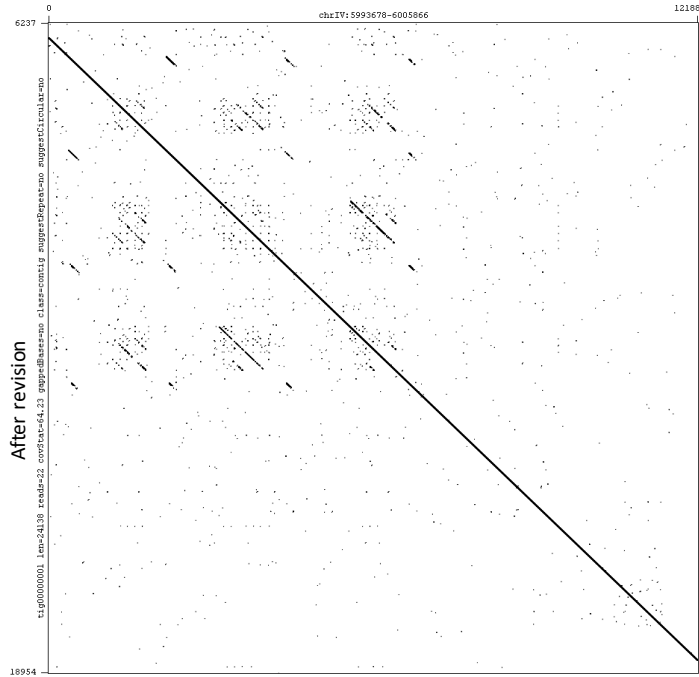

|                                                  |                                               |
|--------------------------------------------------|-----------------------------------------------|
| Assembler, read set, and<br>contig with an error | miniasm, PacBio,<br>vc2010.miniasm.quiver.007 |
|--------------------------------------------------|-----------------------------------------------|

| Revised | chromosome | start   | end     |
|---------|------------|---------|---------|
| region  | chrV       | 427,343 | 436,627 |

Alignments of raw reads to the focal VC2010 contig are partial in the arrowed region, implying the presence of an undesirable region in the contig. Indeed, the contig before revision has false positive duplicated regions, while the revised contig perfectly matched the ce10 reference in the x-axis.

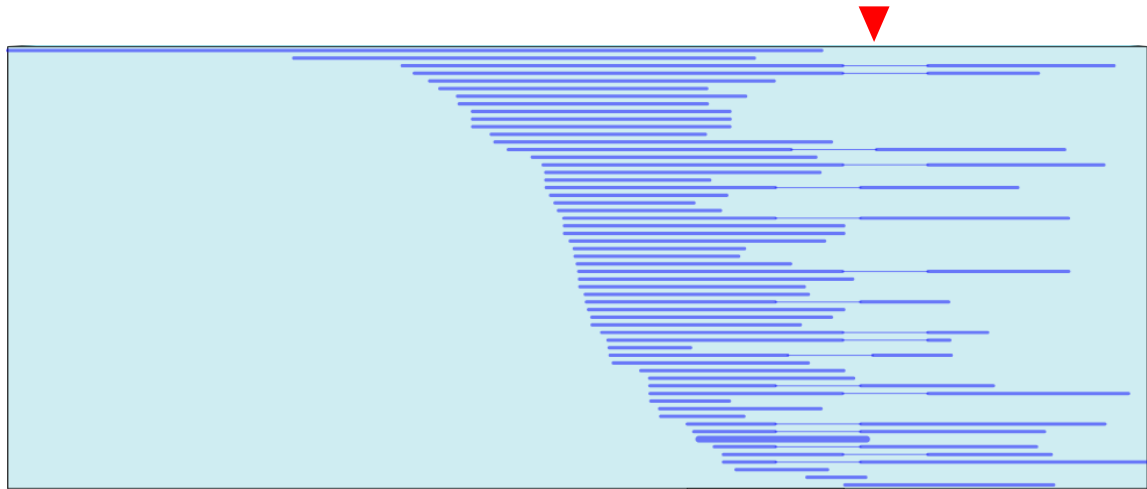

The revised contig perfectly matched the ce10 reference in the x-axis.

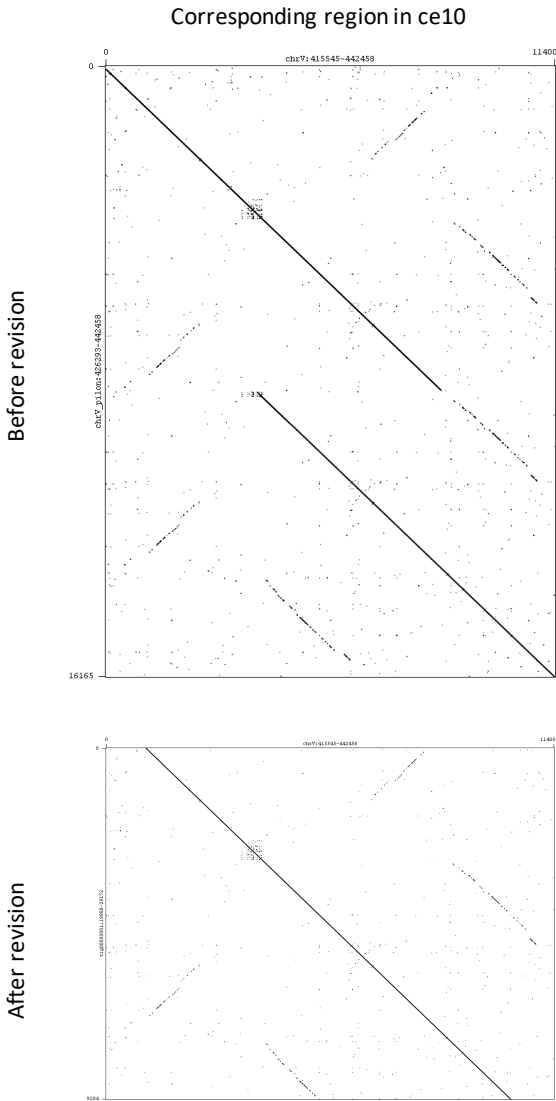

|                                                  |                                               |
|--------------------------------------------------|-----------------------------------------------|
| Assembler, read set, and<br>contig with an error | miniasm, PacBio,<br>vc2010.miniasm.quiver.007 |
|--------------------------------------------------|-----------------------------------------------|

| Revised | chromosome | start   | end     |
|---------|------------|---------|---------|
| region  | chrV       | 824,103 | 832,294 |

Alignments of raw reads to the focal VC2010 contig are partial in the arrowed region, implying the presence of an undesirable region in the contig. Indeed, the contig before revision has false positive duplicated regions, while the revised contig perfectly matched the ce10 reference in the x-axis.

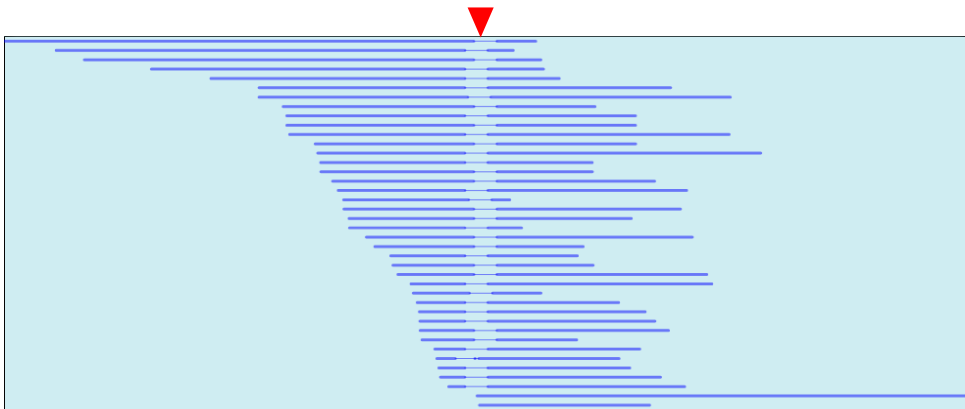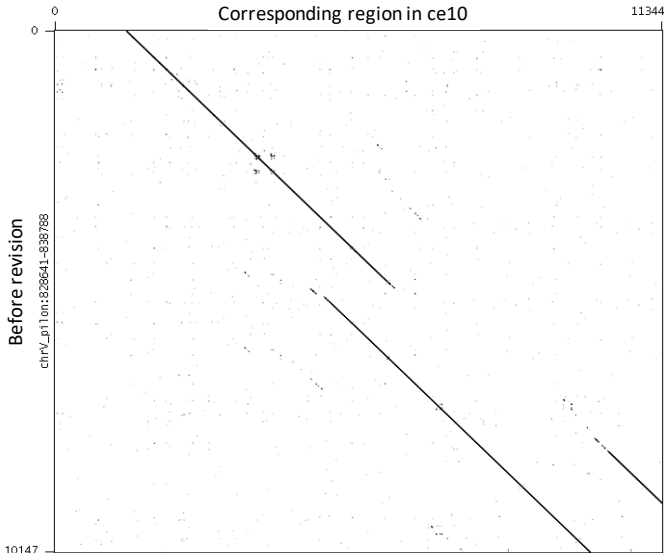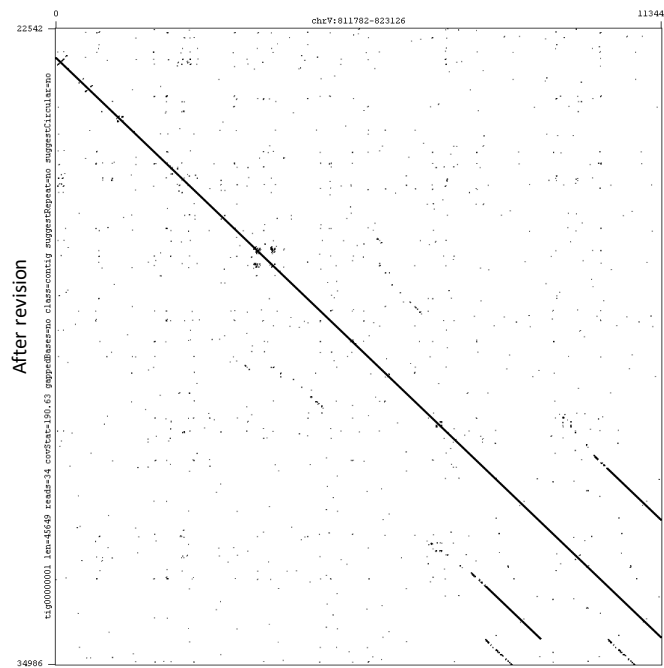

|                                                  |                                        |
|--------------------------------------------------|----------------------------------------|
| Assembler, read set, and<br>contig with an error | miniasm, PacBio and ONT,<br>utg0000051 |
|--------------------------------------------------|----------------------------------------|

| Revised | chromosome | start     | end       |
|---------|------------|-----------|-----------|
| region  | chrV       | 5,067,935 | 5,080,560 |

Blue disks in the arrowed region show insertions into the contig, implying a missing part in the VC2010 genome. The revised contig perfectly matched the ce10 reference in the x-axis.

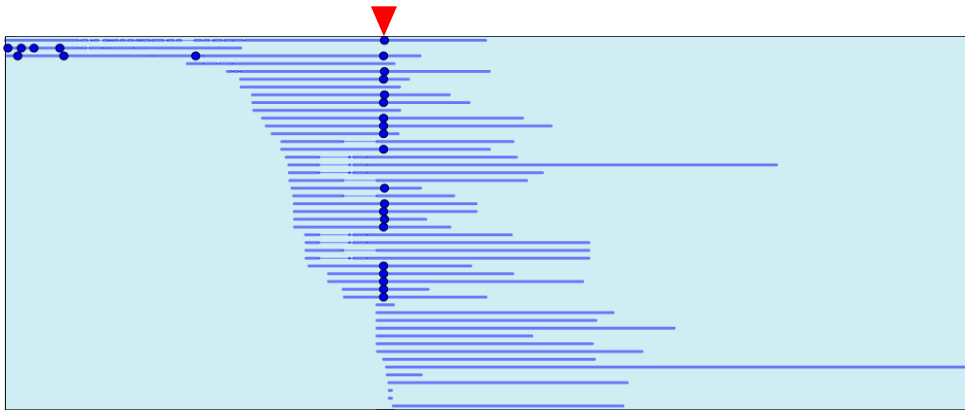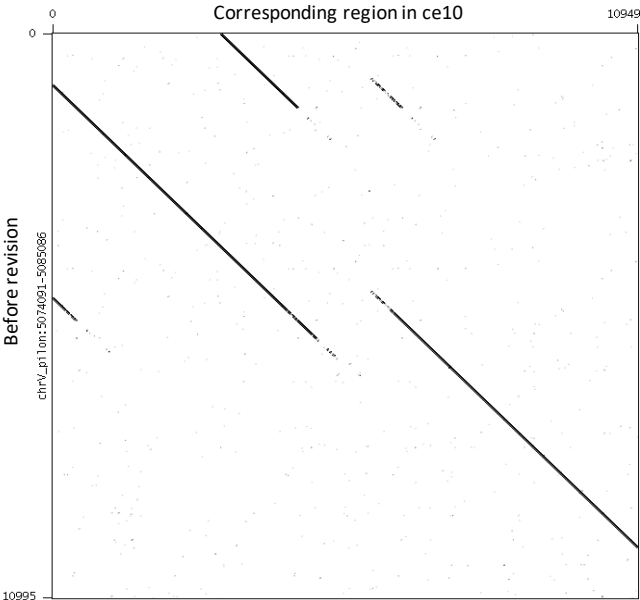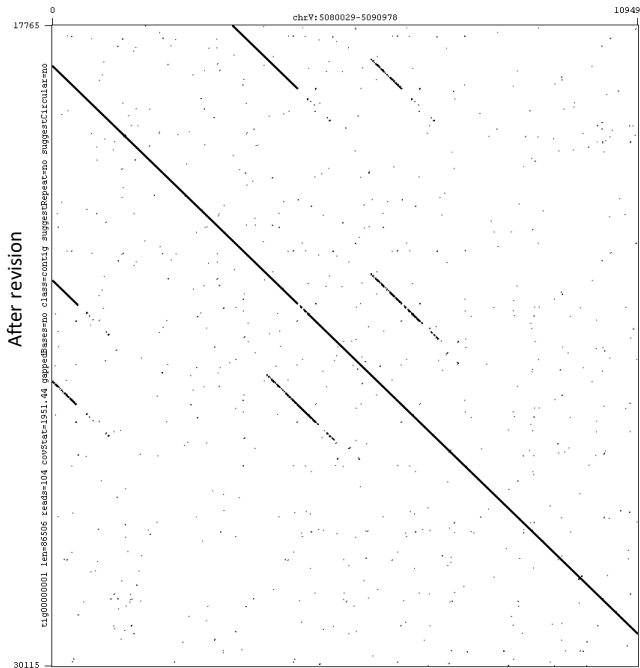



|                                                  |                                        |
|--------------------------------------------------|----------------------------------------|
| Assembler, read set, and<br>contig with an error | miniasm, PacBio and ONT,<br>utg000005l |
|--------------------------------------------------|----------------------------------------|

|         |            |           |           |
|---------|------------|-----------|-----------|
| Revised | chromosome | start     | end       |
| region  | chrV       | 6,006,957 | 6,009,592 |

Alignments of raw reads to the focal VC2010 contig are partial in the arrowed region, implying the presence of an undesirable region in the contig. Indeed, the contig before revision has false positive duplicated regions, while the revised contig perfectly matched the ce10 reference in the x-axis.

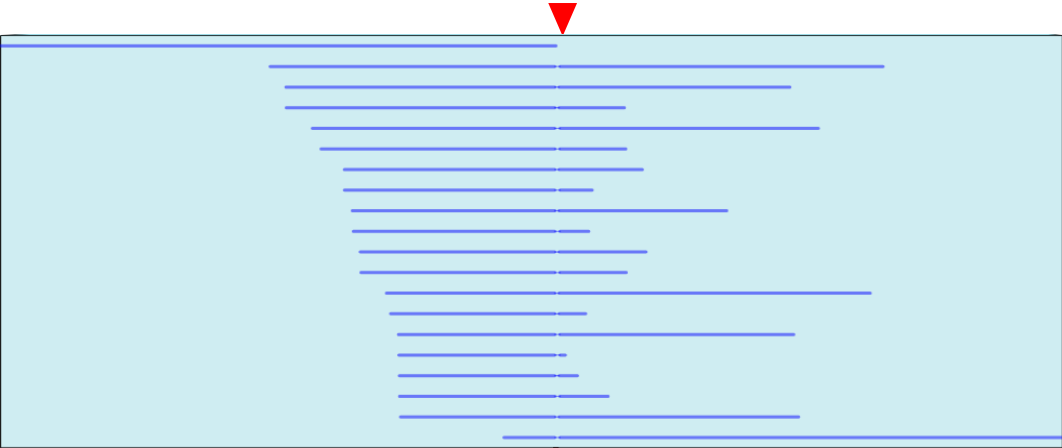

Corresponding region in ce10

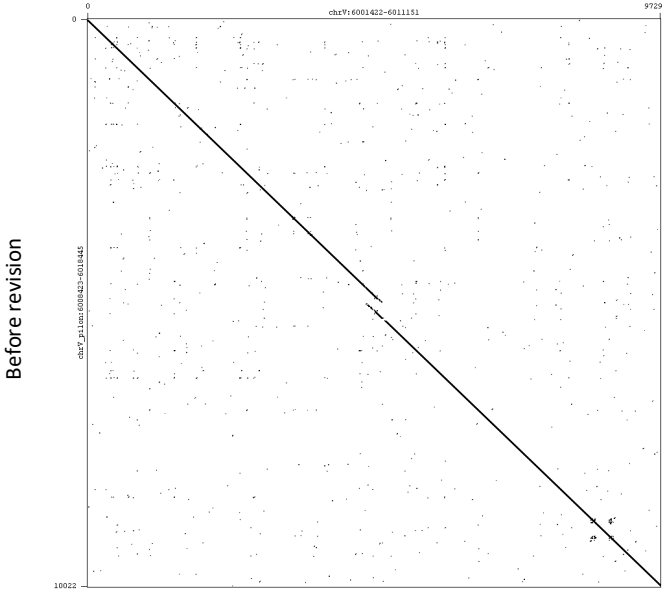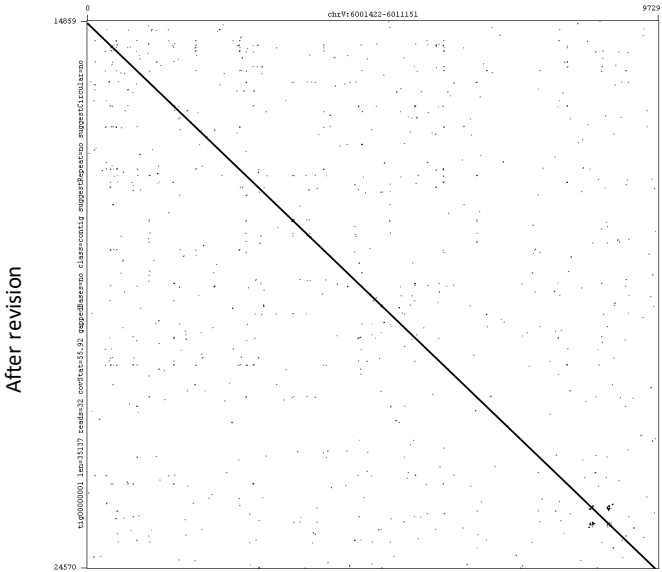

|                                                  |                                        |
|--------------------------------------------------|----------------------------------------|
| Assembler, read set, and<br>contig with an error | miniasm, PacBio and ONT,<br>utg000005l |
|--------------------------------------------------|----------------------------------------|

| Revised | chromosome | start     | end       |
|---------|------------|-----------|-----------|
| region  | chrV       | 6,129,224 | 6,138,343 |

Alignments of raw reads to the focal VC2010 contig are partial in the arrowed region, implying the presence of an undesirable region in the contig. Indeed, the contig before revision has a false positive insertion, while the revised contig perfectly matched the ce10 reference in the x-axis.

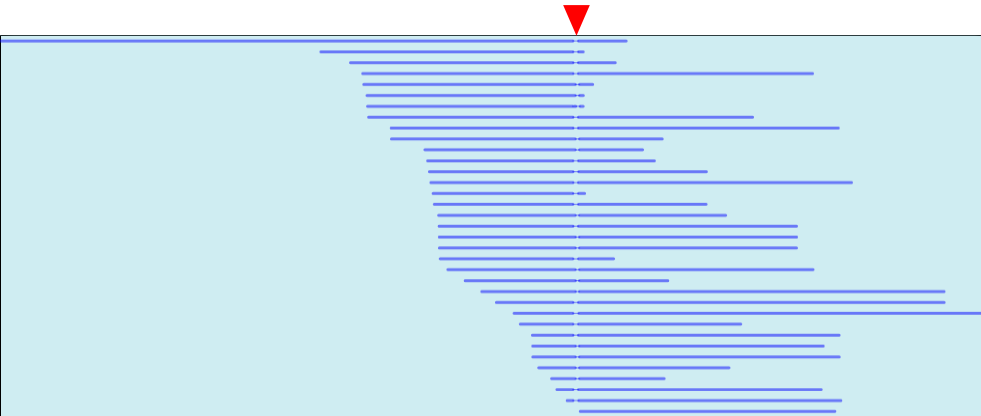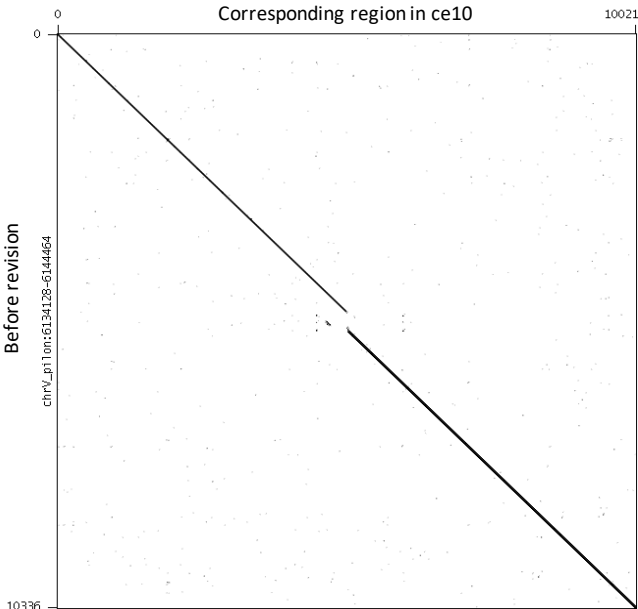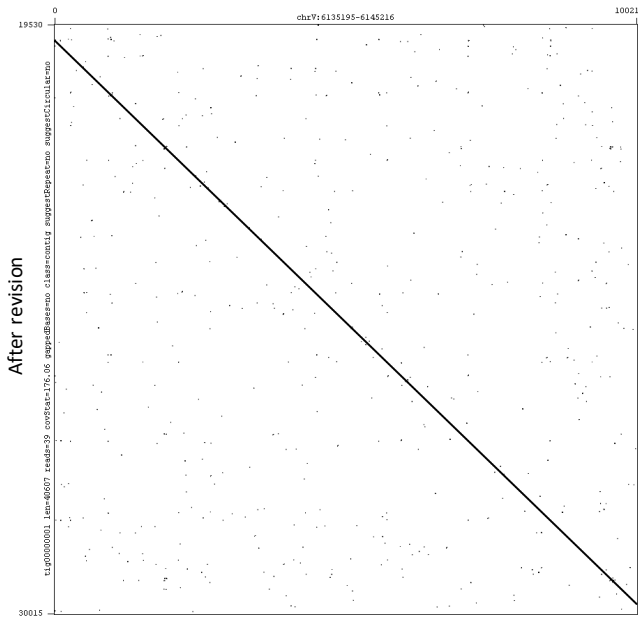



|                                                  |                                         |
|--------------------------------------------------|-----------------------------------------|
| Assembler, read set, and<br>contig with an error | Canu, PacBio,<br>vc2010.canu.quiver.002 |
|--------------------------------------------------|-----------------------------------------|

| Revised | chromosome | start      | end        |
|---------|------------|------------|------------|
| region  | chrV       | 12,566,583 | 12,575,930 |

Alignments of raw reads to the focal VC2010 contig are partial in the arrowed region, implying the presence of an undesirable region in the contig. Indeed, the contig before revision has a false positive insertion, while the revised contig perfectly matched the ce10 reference in the x-axis.

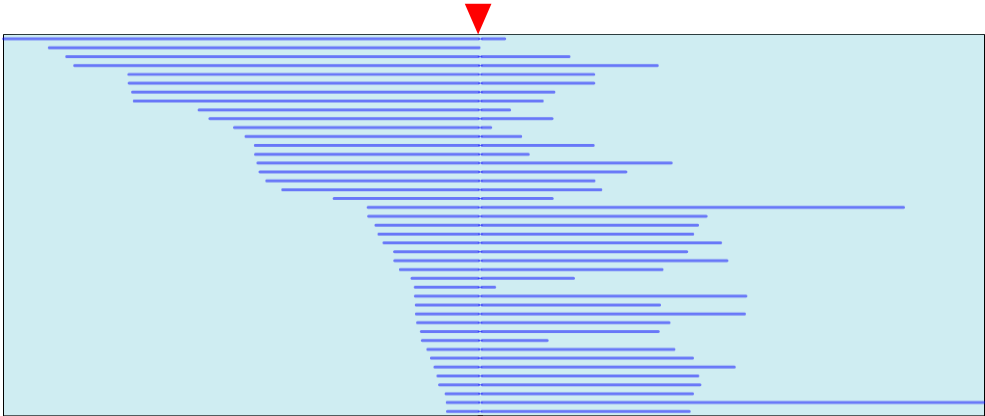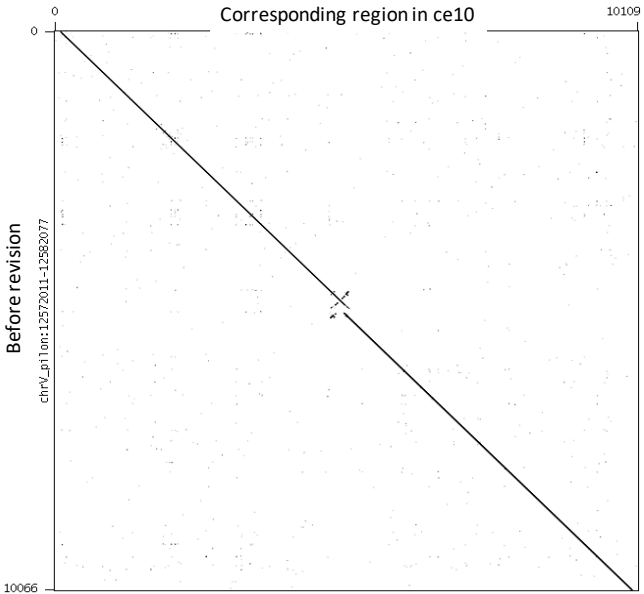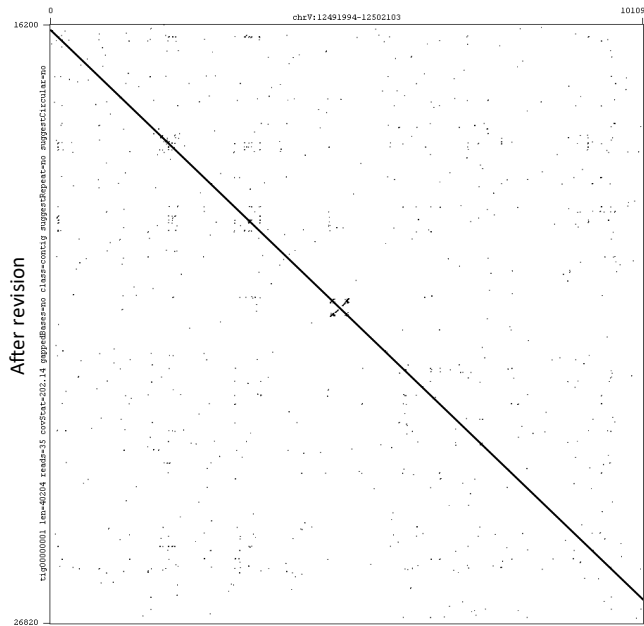

|                                                  |                                               |
|--------------------------------------------------|-----------------------------------------------|
| Assembler, read set, and<br>contig with an error | miniasm, PacBio,<br>vc2010.miniasm.quiver.009 |
|--------------------------------------------------|-----------------------------------------------|

| Revised | chromosome | start     | end       |
|---------|------------|-----------|-----------|
| region  | chrX       | 1,663,381 | 1,712,186 |

Blue disks in the arrowed region show insertions into the contig, implying a missing part in the VC2010 genome. The revised contig had a longer tandem repeat expansion in the first half and one more genome duplication in the latter half than the previous version had.

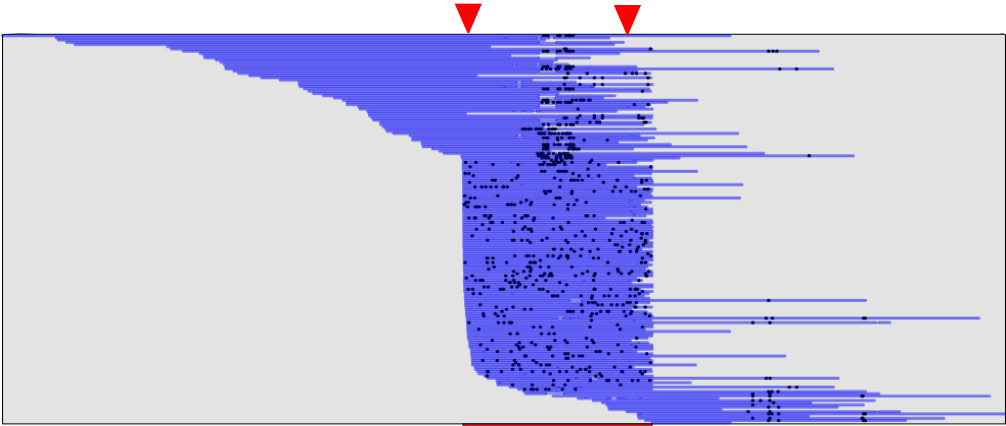

Corresponding region in ce10

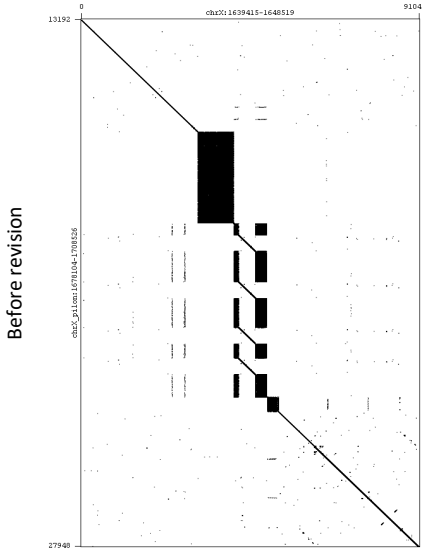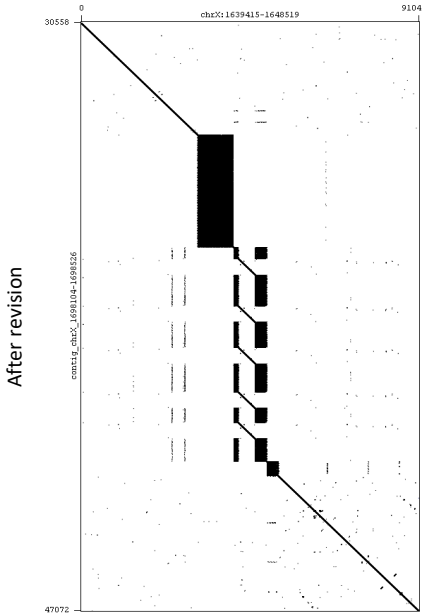

|                                                  |                                               |
|--------------------------------------------------|-----------------------------------------------|
| Assembler, read set, and<br>contig with an error | miniasm, PacBio,<br>vc2010.miniasm.quiver.009 |
|--------------------------------------------------|-----------------------------------------------|

| Revised | chromosome | start     | end       |
|---------|------------|-----------|-----------|
| region  | chrX       | 2,151,788 | 2,173,448 |

Blue disks in the arrowed regions show insertions into the contig, implying a missing part in the VC2010 genome. In the revised contig, tandem repeat expansions are corrected properly.

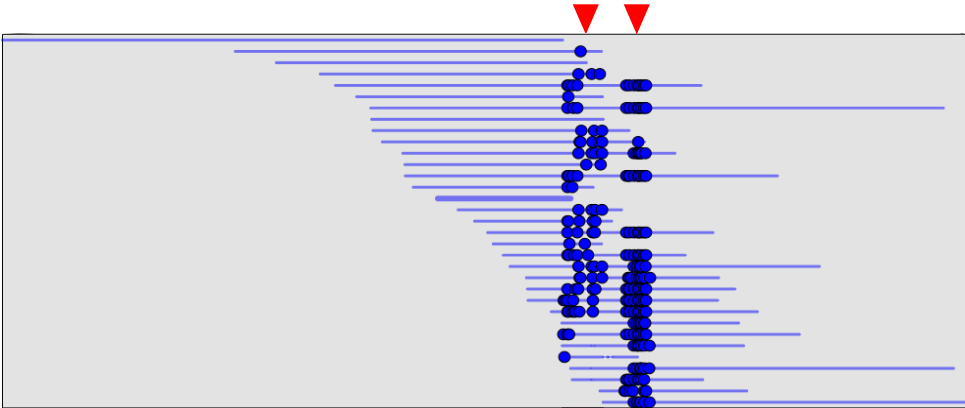

Corresponding region in ce10

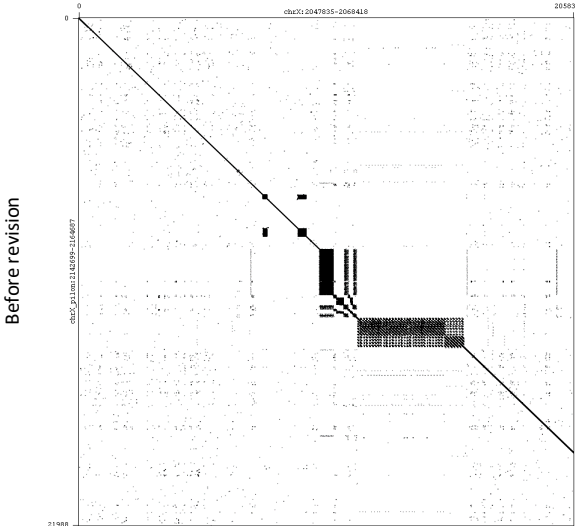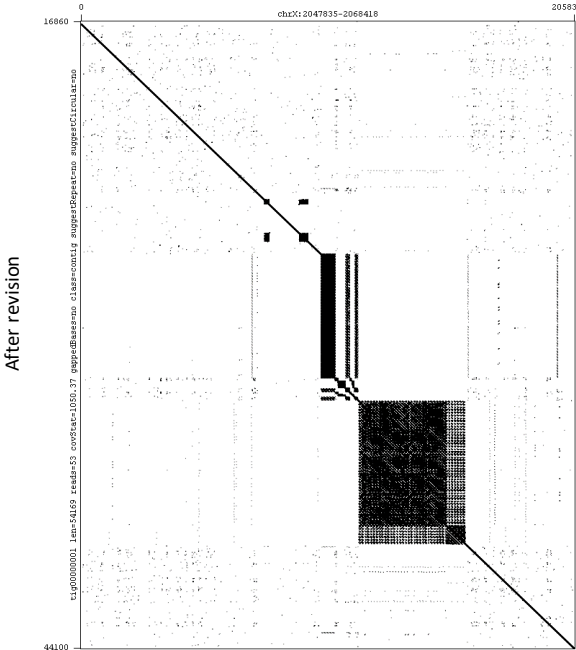

|                                                  |                                               |
|--------------------------------------------------|-----------------------------------------------|
| Assembler, read set, and<br>contig with an error | miniasm, PacBio,<br>vc2010.miniasm.quiver.008 |
|--------------------------------------------------|-----------------------------------------------|

| Revised | chromosome | start      | end        |
|---------|------------|------------|------------|
| region  | chrX       | 17,683,237 | 17,691,717 |

Blue disks in the arrowed region show insertions into the contig, implying a missing part in the VC2010 genome. In the revised contig, tandem repeat expansions are corrected slightly.

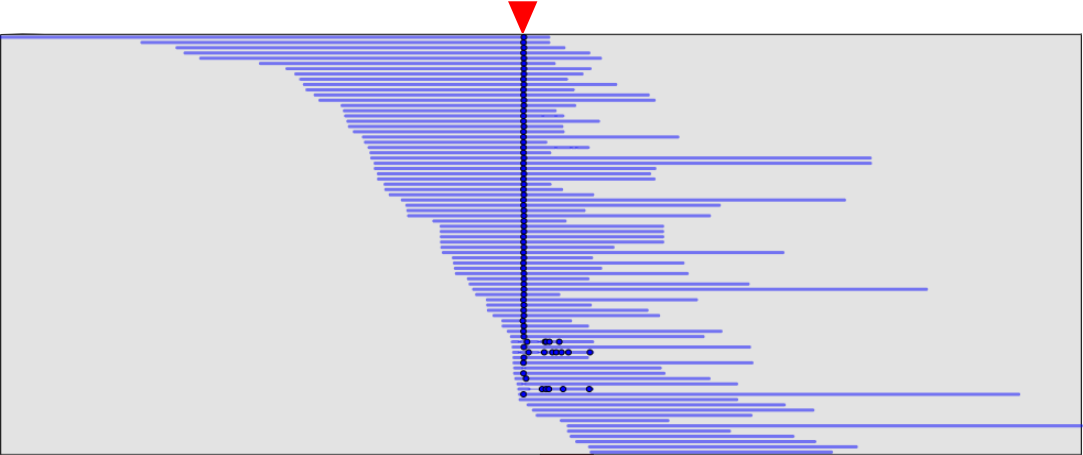

Corresponding region in ce10

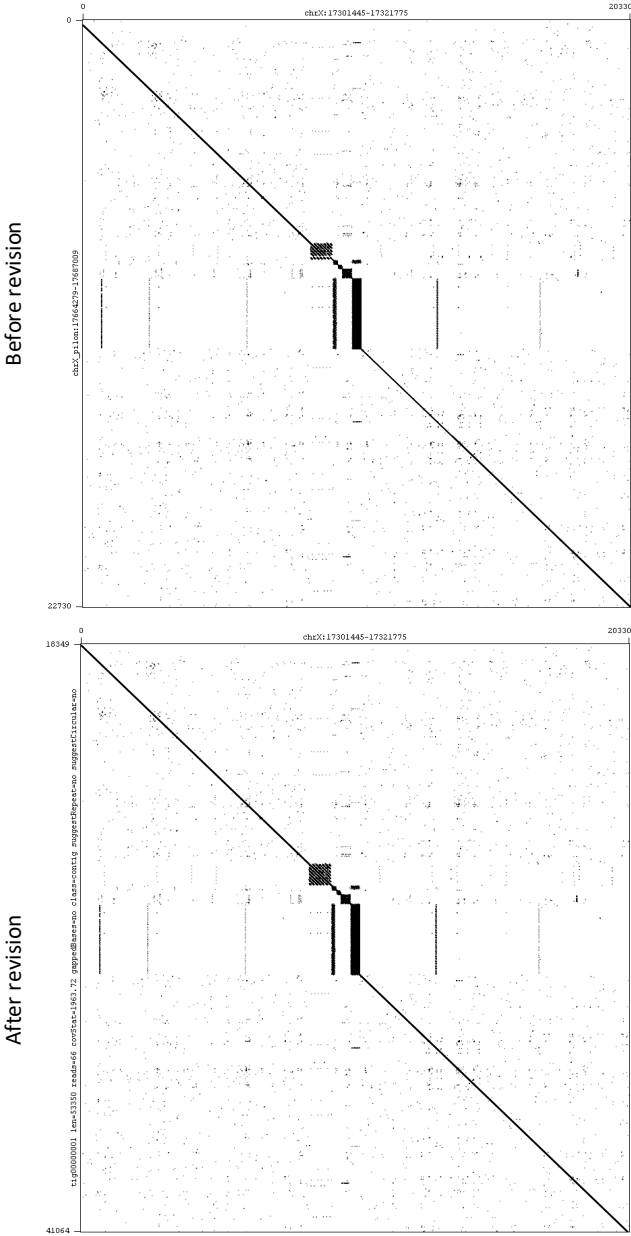

Supplement: Supplemental_Figure_S1.pdf [file Supplemental_Figure_S1.pdf]
