# Supplementary material for: Recompleting the Caenorhabditis elegans genome
Source: HighWire-hosted journal article supplement (doi:10.1101/gr.244830.118), 2019-05-23
Supplement: Supplemental_Table_S1.xlsx [file Supplemental_Table_S1.xlsx]

## Sheet: VC2010_Supp_Table_01
Table 1: Raw reads
read type	Illumina MiSeq	PacBio RS II				ONT nanopore
Strain	PD1074	PD1073	PD1074	PD1075	Sum of PD1073,4,5	PD1074
						Breakdown of nanopore runs
						1st	2nd	3rd	4th	5th	6th	7th	1st - 7th	2nd - 7th **
Number of reads	135172969	414142	2543379	358588	3316109	59637	221	35252	2451	39065	51441	37768	225835	166198
Average length	73.62	10413.5	8446	9449.64	8800.11	8200.79	16153.4	15542.9	15620.7	17740	16370.5	15961.9	14244.1	16412.7
Max length	96	45372	71498	46168	71498	151883	154463	253612	194913	262785	249179	336266	336266	336266
Min length	15	500	50	500	50	65	61	26	189	62	31	15	15	15
Total Bases	9951909721	4312645007	21480953905	3388525965	29182124877	489070709	3569897	547916554	38286232	693014370	842115251	602849422	3216822435	2727751726
Coverage	99.51	43.1265	214.81	33.8853	291.821	4.89	0.04	5.48	0.38	6.93	8.42	6.03	32.17	27.2775	coverage by Nxx
N10		23444	22916	22548		37851	118936	81909	83462	76877	70512	67055	69886	73683	2.72775
N20		20960	19001	20206		27592	59954	58762	59149	57958	53243	50939	51317	54923	5.4555
N30		19163	16619	18145		21811	49887	45240	46488	46121	42904	40831	40272	43697	8.18326
N40		17060	14722	15882		17694	39227	36008	37948	37635	34852	33358	32247	35443	10.911
N50		14919	13170	13746		14373	29895	28791	30345	30729	28496	27400	25962	28858	13.6388
N60		12855	11605	11732		11678	26698	22854	23233	24677	23089	22382	20687	23243	16.3665
N70		10810	9629	9780		9084	19759	17380	17809	19305	17967	17579	15914	18121	19.0943
N80		8704	7428	7760		6696	13484	12442	12619	14422	13474	13371	11803	13461	21.822
N90		6041	4798	5278		4173	7719	7979	7799	9468	8700	8703	7386	8704	24.5498
N99		1869	1390	1678		1039	2063	1973	1932	2362	2129	2164	1756	2151	27.0047
														** The quality of the 1st Nanopore run was low and removed.
