# Supplementary material for: Recompleting the Caenorhabditis elegans genome
Source: HighWire-hosted journal article supplement (doi:10.1101/gr.244830.118), 2019-05-23
Supplement: Supplemental_Table_S2.xlsx [file Supplemental_Table_S2.xlsx]

## Sheet: VC2010_Supp_Table_02
Table 2: Seven assemblies
	Primary assembly	Used for filling gaps in the Canu assembly
Read sets	Pacbio			PacBio and Oxford nanopore MinION
Assembler	Canu+quiver	miniasm+quiver	FALCON+quiver	Canu+quiver	miniasm+quiver	FALCON+quiver	HINGE+quiver
Assembly name	Canu_PacBio	miniasm_PacBio	FALCON_PacBio	Canu_PacBio_ONT	miniasm_PacBio_ONT	FALCON_PacBio_ONT	HINGE_PacBio_ONT
Number of contigs	116	136	81	107	188	85	207
Average length	889176	746694	1.24854e+06	970473	570387	1.18851e+06	1.00835e+06
Max length	4709104	5956019	6920990	4594104	6661009	6298386	6853139
Min length	14442	3079	3754	23192	8116	2975	2680
Total Bases	103144427	101550414	101131383	103840599	107232765	101023162	208727524
Coverage	1.03	1.02	1.01	1.04	1.07	1.01	2.09
N10	4190767	5253635	5317733	4193691	5945127	5297042	5649419
N20	3069039	3492464	4523747	3300246	4621609	4505816	4768418
N30	2696435	2839862	3610869	2898263	4080195	3420137	4080827
N40	2047309	2216755	2833763	2536966	3463416	2820797	3725818
N50	1875571	1917690	2616834	2106598	2753689	2659900	2516009
N60	1481471	1574604	2062178	1905177	1830456	2052426	2407914
N70	1089411	969466	1853784	1457007	1426000	1849119	1539719
N80	857692	741599	1218750	1060393	967908	1405024	1071461
N90	527373	406508	954722	641258	567082	935449	650435
N99	83876	80322	109826	74904	15749	109468	60378
