# Supplementary material for: Recompleting the Caenorhabditis elegans genome
Source: HighWire-hosted journal article supplement (doi:10.1101/gr.244830.118), 2019-05-23
Supplement: Supplemental_Table_S3.xlsx [file Supplemental_Table_S3.xlsx]

## Sheet: VC2010_Supp_Table_03
chr	contig of canu_PacBio	How the gap is filled	Contigs covering a gap
			miniasm_PacBio	FALCON_PacBio	canu_PacBio_ONT	miniasm_PacBio_ONT	FALCON_PacBio_ONT	HINGE_PacBio_ONT	Number of contigs or corrected reads spanning the gap
chrI		vc2010.miniasm.quiver.051	vc2010.miniasm.quiver.051						1
chrI	vc2010.canu.quiver.053
chrI		vc2010.miniasm.quiver.064	vc2010.miniasm.quiver.064	000039F	tig00000386	utg000063l	000037F		5
chrI	vc2010.canu.quiver.073
chrI	merged into a single contig
chrI	vc2010.canu.quiver.004
chrI		000005F		000005F	tig00000428	utg000058l	000005F		4
chrI	vc2010.canu.quiver.078
chrI		a gap filled by a Nanopore read							1
chrI	vc2010.canu.quiver.056	removed
chrI		vc2010.miniasm.quiver.005	vc2010.miniasm.quiver.005	000001F	tig00000039		000001F		4
chrI	vc2010.canu.quiver.001
chrI		vc2010.miniasm.quiver.012	vc2010.miniasm.quiver.012		tig00000124				2
chrI	vc2010.canu.quiver.067
chrI			vc2010.miniasm.quiver.012			utg000087l			2
chrI	vc2010.canu.quiver.091
chrI									1
		subsequence of a corrected read							1
chrI	vc2010.canu.quiver.097
chrI		subsequence of a corrected read							1
chrI	vc2010.canu.quiver.051
chrI		vc2010.miniasm.quiver.041	vc2010.miniasm.quiver.041			utg000018l			2
chrI	vc2010.canu.quiver.003
chrII		000003F		000003F	tig00000001	utg000023l	000003F		4
chrII	vc2010.canu.quiver.022
chrII		vc2010.miniasm.quiver.002	vc2010.miniasm.quiver.002	000003F	tig00000001		000003F		4
chrII	vc2010.canu.quiver.055
chrII			vc2010.miniasm.quiver.002	000003F	tig00000001	utg000043l	000003F		5
chrII	vc2010.canu.quiver.074
chrII			vc2010.miniasm.quiver.002	000003F	tig00000001	utg000043l	000003F		5
chrII	vc2010.canu.quiver.052
chrII			vc2010.miniasm.quiver.002	000043F		utg000043l	000043F		4
chrII	vc2010.canu.quiver.058
chrII			vc2010.miniasm.quiver.002			utg000043l			2
chrII	vc2010.canu.quiver.005
chrII		subsequence of a corrected read							1
chrII	vc2010.canu.quiver.032
chrII		utg000042l				utg000042l			1
chrII	vc2010.canu.quiver.064
chrII		vc2010.miniasm.quiver.017	vc2010.miniasm.quiver.017			utg000042l	000039F		3
chrII	vc2010.canu.quiver.057
chrII		vc2010.miniasm.quiver.017	vc2010.miniasm.quiver.017		tig00000156	utg000042l			3
chrII	vc2010.canu.quiver.011
chrII		000004F		000004F					1
		subsequence of a corrected read							1
chrII	vc2010.canu.quiver.066
		subsequence of a corrected read							1
chrII		a gap filled by a Nanopore read							1
chrII	vc2010.canu.quiver.042
chrII		vc2010.miniasm.quiver.077	vc2010.miniasm.quiver.077						1
chrIII	vc2010.canu.quiver.040
chrIII		subsequence of a corrected read							1
chrIII	vc2010.canu.quiver.088
chrIII		subsequence of a corrected read							1
chrIII	vc2010.canu.quiver.069
chrIII		subsequence of a corrected read							1
chrIII	vc2010.canu.quiver.047
chrIII		000029F		000029F		utg000049l			2
chrIII	vc2010.canu.quiver.063
chrIII		subsequence of a corrected read							1
chrIII	vc2010.canu.quiver.043
chrIII		subsequence of a corrected read							1
chrIII	vc2010.canu.quiver.015
chrIII		tig00000044			tig00000044				1
chrIII	vc2010.canu.quiver.095
chrIII					tig00000044				1
chrIII	vc2010.canu.quiver.030
chrIII		vc2010.miniasm.quiver.022	vc2010.miniasm.quiver.022	000017F		utg000033l	000017F		4
chrIII	vc2010.canu.quiver.044
chrIII		a gap							0
chrIII	vc2010.canu.quiver.083
chrIII		000009F		000009F					1
chrIII	vc2010.canu.quiver.009
chrIII		vc2010.miniasm.quiver.003	vc2010.miniasm.quiver.003				000000F		2
chrIII	vc2010.canu.quiver.007
chrIII			vc2010.miniasm.quiver.003	000006F		utg000014l	000000F		4
chrIII	vc2010.canu.quiver.059
chrIII			vc2010.miniasm.quiver.003	000006F		utg000014l	000000F		4
chrIII	vc2010.canu.quiver.080
chrIV	vc2010.canu.quiver.045
chrIV		000010F		000010F	tig00004643	utg000021l	000009F		4
chrIV	vc2010.canu.quiver.013
chrIV		utg000021l				utg000021l			1
chrIV	vc2010.canu.quiver.065
chrIV		tig00000238			tig00000238	utg000021l			2
chrIV	vc2010.canu.quiver.029
chrIV		vc2010.miniasm.quiver.006	vc2010.miniasm.quiver.006			utg000021l			2
chrIV	vc2010.canu.quiver.017
chrIV			vc2010.miniasm.quiver.006	000015F		utg000021l	000016F		4
chrIV	vc2010.canu.quiver.068
chrIV		subsequence of a corrected read							1
chrIV	vc2010.canu.quiver.019
chrIV		vc2010.miniasm.quiver.035	vc2010.miniasm.quiver.035						1
chrIV	vc2010.canu.quiver.060
chrIV			vc2010.miniasm.quiver.035			utg000003l			2
chrIV	vc2010.canu.quiver.018
chrIV		vc2010.miniasm.quiver.019	vc2010.miniasm.quiver.019			utg000003l			2
chrIV	vc2010.canu.quiver.102
chrIV			vc2010.miniasm.quiver.019						1
		subsequence of a corrected read							1
chrIV	vc2010.canu.quiver.087
chrIV		subsequence of a corrected read							1
chrIV	vc2010.canu.quiver.038
chrIV		vc2010.miniasm.quiver.011	vc2010.miniasm.quiver.011	000028F	tig00000119	utg000013l	000029F		5
chrIV	vc2010.canu.quiver.070
chrIV			vc2010.miniasm.quiver.011		tig00000119	utg000013l			3
chrIV	vc2010.canu.quiver.033
chrIV		utg000030l				utg000030l			1
chrIV	vc2010.canu.quiver.026
chrIV		vc2010.miniasm.quiver.026	vc2010.miniasm.quiver.026	000014F	tig00000003	utg000030l	000014F		5
chrIV	vc2010.canu.quiver.061
chrIV		vc2010.miniasm.quiver.024	vc2010.miniasm.quiver.024	000014F	tig00000003	utg000030l	000014F		5
chrIV	vc2010.canu.quiver.103
chrIV			vc2010.miniasm.quiver.024	000014F	tig00000003	utg000030l	000014F		5
chrIV	vc2010.canu.quiver.049
chrIV			vc2010.miniasm.quiver.024		tig00000003	utg000030l			3
chrIV	vc2010.canu.quiver.023
chrV	vc2010.canu.quiver.075
chrV		vc2010.miniasm.quiver.007	vc2010.miniasm.quiver.007						1
chrV	vc2010.canu.quiver.028
chrV			vc2010.miniasm.quiver.007	000002F		utg000004l	000002F		4
chrV	vc2010.canu.quiver.054
chrV			vc2010.miniasm.quiver.007	000002F	tig00000029	utg000004l	000002F		5
chrV	vc2010.canu.quiver.008
chrV		utg000005l				utg000005l		Consensus31_quiver_734077_662413	1
chrV	vc2010.canu.quiver.077
chrV		Consensus31_quiver_734077_662413						Consensus31_quiver_734077_662413	1
chrV	vc2010.canu.quiver.046
chrV		utg000005l				utg000005l			1
chrV	vc2010.canu.quiver.089
chrV						utg000005l			1
		subsequence of a corrected read							1
chrV	vc2010.canu.quiver.021
chrV		utg000031l				utg000031l			1
chrV	vc2010.canu.quiver.093
chrV			vc2010.miniasm.quiver.047			utg000031l			2
chrV	vc2010.canu.quiver.048
chrV		vc2010.miniasm.quiver.061	vc2010.miniasm.quiver.061	000000F	tig00000107	utg000029l	000011F		5
chrV	vc2010.canu.quiver.050
chrV		vc2010.miniasm.quiver.001	vc2010.miniasm.quiver.001	000000F	tig00000107	utg000029l	000011F		5
chrV	vc2010.canu.quiver.081
chrV			vc2010.miniasm.quiver.001	000000F	tig00000107	utg000029l	000011F		5
chrV	vc2010.canu.quiver.039
chrV		Consensus70_quiver_1857482_1763434	vc2010.miniasm.quiver.001	000000F				Consensus70_quiver_1857482_1763434	2
chrV	vc2010.canu.quiver.002
		subsequence of a corrected read							1
chrV		utg000028l				utg000028l			1
chrV	vc2010.canu.quiver.016
chrV		utg000036l				utg000036l			1
chrV	vc2010.canu.quiver.062
chrV		utg000036l				utg000036l			1
chrV	vc2010.canu.quiver.079
chrV		subsequence of a corrected read							1
chrV	vc2010.canu.quiver.090
chrV		subsequence of a corrected read							1
chrV	vc2010.canu.quiver.034
chrV		vc2010.miniasm.quiver.059	vc2010.miniasm.quiver.059			utg000016l			2
chrV	vc2010.canu.quiver.010
chrX	vc2010.canu.quiver.085
chrX		subsequence of a corrected read				utg000089l			1
chrX	vc2010.canu.quiver.082
chrX		subsequence of a corrected read							1
chrX	vc2010.canu.quiver.024
chrX		vc2010.miniasm.quiver.009	vc2010.miniasm.quiver.009	000023F	tig00004645	utg000050l	000023F		5
chrX	vc2010.canu.quiver.084
chrX			vc2010.miniasm.quiver.009	000023F	tig00004645	utg000050l	000023F		5
chrX	vc2010.canu.quiver.092
chrX			vc2010.miniasm.quiver.009		tig00004645		000023F		3
chrX	vc2010.canu.quiver.094
chrX			vc2010.miniasm.quiver.009						1
chrX	vc2010.canu.quiver.036
chrX		Consensus83_quiver_506992_366005						Consensus83_quiver_506992_366005	1
chrX		subsequence of a corrected read							1
chrX		utg000061l				utg000061l			1
chrX	vc2010.canu.quiver.035
chrX		a gap filled by a Nanopore read							1
chrX	vc2010.canu.quiver.037
chrX		a gap							0
		subsequence of a corrected read							1
chrX	vc2010.canu.quiver.014
chrX		vc2010.miniasm.quiver.004	vc2010.miniasm.quiver.004			utg000035l			2
chrX	vc2010.canu.quiver.071
chrX			vc2010.miniasm.quiver.004	000016F	tig00000178	utg000035l	000007F		5
chrX	vc2010.canu.quiver.020
chrX		000007F					000007F		1
chrX	vc2010.canu.quiver.076
chrX		vc2010.miniasm.quiver.027	vc2010.miniasm.quiver.027	000030F	tig00000356	utg000024l	000007F		5
chrX	vc2010.canu.quiver.041
chrX			vc2010.miniasm.quiver.027						1
chrX	vc2010.canu.quiver.027
chrX		subsequence of a corrected read							1
chrX	vc2010.canu.quiver.086
chrX		subsequence of a corrected read							1
chrX	vc2010.canu.quiver.006
chrX		subsequence of a corrected read							1
chrX	vc2010.canu.quiver.012
chrX		vc2010.miniasm.quiver.008	vc2010.miniasm.quiver.008	000011F	tig00000285	utg000022l	000010F		5
		Consensus99_quiver_295576_221462						Consensus99_quiver_295576_221462	1
chrX	vc2010.canu.quiver.072
chrM		vc2010.miniasm.quiver.130	vc2010.miniasm.quiver.130						1
