# Supplementary material for: Recompleting the Caenorhabditis elegans genome
Source: HighWire-hosted journal article supplement (doi:10.1101/gr.244830.118), 2019-05-23
Supplement: Supplemental_Table_S6.xlsx [file Supplemental_Table_S6.xlsx]

## Sheet: VC2010_Supp_Table_06
Effect of polishing the VC2010 genome assembly by Illumina short reads (Pilon)
	Before polishing with Pilon	After polishing with Pilon
	ratio (%)	ratio (%)
mismatch ratio	0.000155	0.0001577
insertion/deletion ratio	6.65e-05	6.15e-05
mismatch and indel ratio	0.0002215	0.0002192
nucleotide identity	0.999779	0.999781
