# Supplementary material for: Recompleting the Caenorhabditis elegans genome
Source: HighWire-hosted journal article supplement (doi:10.1101/gr.244830.118), 2019-05-23
Supplement: Supplemental_Table_S8.xlsx [file Supplemental_Table_S8.xlsx]

## Sheet: Summary
Gene type	Status	Number
Protein-coding	total canonical	20104
	no.lift	40
	lifted_bad.trans	108
	lifted_no.ident	66
	lifted_some.ident	11
	lifted_all.ident	19879
ncRNA	total canonical	25042
	no.lift	26
	lifted_bad.coding	321
	lifted_no.ident	183
	lifted_all.ident	24512
Pseudogene	total canonical	1900
	no.lift	3
	lifted_bad.coding	3
	lifted_no.ident	41
	lifted_all.ident	1853

## Sheet: Protein-coding
Gene	Gene_type	Liftover_status	Shared_coding_AUGUSTUS_gene
WBGene00000001|Y110A7A.10|aap-1	protein_coding	lifted_all.ident	chrI_pilon.g841
WBGene00000002|F27C8.1|aat-1	protein_coding	lifted_all.ident	chrIV_pilon.g11359
WBGene00000003|F07C3.7|aat-2	protein_coding	lifted_all.ident	chrV_pilon.g15205
WBGene00000004|F52H2.2|aat-3	protein_coding	lifted_all.ident	chrX_pilon.g18634
WBGene00000005|T13A10.10|aat-4	protein_coding	lifted_all.ident	chrIV_pilon.g10585
WBGene00000006|C55C2.5|aat-5	protein_coding	lifted_all.ident	chrI_pilon.g359
WBGene00000007|T11F9.4|aat-6	protein_coding	lifted_all.ident	chrV_pilon.g15779
WBGene00000008|F54D12.3|aat-7	protein_coding	lifted_all.ident	chrII_pilon.g3337
WBGene00000009|F28F9.4|aat-8	protein_coding	lifted_all.ident	chrIV_pilon.g10047
WBGene00000010|Y53H1C.1|aat-9	protein_coding	lifted_all.ident	chrI_pilon.g2259
WBGene00000012|C50F2.9|abf-1	protein_coding	lifted_all.ident	chrI_pilon.g602
WBGene00000013|C50F2.10|abf-2	protein_coding	lifted_all.ident	chrI_pilon.g601
WBGene00000014|F54B8.5|abf-3	protein_coding	lifted_all.ident	chrV_pilon.g16935
WBGene00000015|Y38H6C.22|abf-4	protein_coding	lifted_all.ident	chrV_pilon.g18115
WBGene00000016|T22H6.5|abf-5	protein_coding	lifted_all.ident	chrX_pilon.g20312
WBGene00000017|T22H6.7|abf-6	protein_coding	lifted_all.ident	chrX_pilon.g20313
WBGene00000018|M79.1|abl-1	protein_coding	lifted_all.ident	chrX_pilon.g19928
WBGene00000019|C24F3.5|abt-1	protein_coding	lifted_all.ident	chrIV_pilon.g11536
WBGene00000020|F12B6.1|abt-2	protein_coding	lifted_all.ident	chrI_pilon.g307
WBGene00000022|Y39D8C.1|abt-4	protein_coding	lifted_all.ident	chrV_pilon.g12974
WBGene00000023|Y53C10A.9|abt-5	protein_coding	lifted_all.ident	chrI_pilon.g2383
WBGene00000024|AC3.3|abu-1	protein_coding	lifted_all.ident	chrV_pilon.g15503
WBGene00000025|F19G12.7|abu-2	protein_coding	lifted_all.ident	chrX_pilon.g18432
WBGene00000027|Y5H2A.3|abu-4	protein_coding	lifted_all.ident	chrV_pilon.g13442
WBGene00000028|Y105C5A.4|abu-5	protein_coding	lifted_all.ident	chrIV_pilon.g12641
WBGene00000029|C03A7.7|abu-6	protein_coding	lifted_all.ident	chrV_pilon.g14181
WBGene00000030|C03A7.8|abu-7	protein_coding	lifted_all.ident	chrV_pilon.g14182
WBGene00000031|C03A7.14|abu-8	protein_coding	lifted_all.ident	chrV_pilon.g14192
WBGene00000032|R09F10.2|abu-9	protein_coding	lifted_all.ident	chrX_pilon.g19556
WBGene00000033|F35A5.3|abu-10	protein_coding	lifted_all.ident	chrX_pilon.g18821
WBGene00000034|T01D1.6|abu-11	protein_coding	lifted_all.ident	chrII_pilon.g3064
WBGene00000035|W09B12.1|ace-1	protein_coding	lifted_all.ident	chrX_pilon.g20875
WBGene00000036|Y44E3A.2|ace-2	protein_coding	lifted_all.ident	chrI_pilon.g491
WBGene00000037|Y48B6A.8|ace-3	protein_coding	lifted_all.ident	chrII_pilon.g6499
WBGene00000038|Y48B6A.7|ace-4	protein_coding	lifted_all.ident	chrII_pilon.g6498
WBGene00000039|C42D8.5|acn-1	protein_coding	lifted_all.ident	chrX_pilon.g19014
WBGene00000040|ZK455.1|aco-1	protein_coding	lifted_all.ident	chrX_pilon.g20056
WBGene00000041|F54H12.1|aco-2	protein_coding	lifted_all.ident	chrIII_pilon.g8278
WBGene00000042|K11G12.2|acr-2	protein_coding	lifted_all.ident	chrX_pilon.g19287
WBGene00000043|K11G12.7|acr-3	protein_coding	lifted_all.ident	chrX_pilon.g19288
WBGene00000044|K03F8.2|acr-5	protein_coding	lifted_all.ident	chrIII_pilon.g7961
WBGene00000045|ZK973.5|acr-6	protein_coding	lifted_all.ident	chrI_pilon.g687
WBGene00000046|T09A5.3|acr-7	protein_coding	lifted_all.ident	chrII_pilon.g5109
WBGene00000047|ZC504.2|acr-8	protein_coding	lifted_all.ident	chrX_pilon.g19900
WBGene00000048|C40C9.2|acr-9	protein_coding	lifted_all.ident	chrX_pilon.g20455
WBGene00000049|R02E12.8|acr-10	protein_coding	lifted_all.ident	chrX_pilon.g18852
WBGene00000050|D2092.3|acr-11	protein_coding	lifted_all.ident	chrI_pilon.g1205
WBGene00000051|R01E6.4|acr-12	protein_coding	lifted_all.ident	chrX_pilon.g20432
WBGene00000053|T05C12.2|acr-14	protein_coding	lifted_all.ident	chrII_pilon.g5179
WBGene00000054|F25G6.4|acr-15	protein_coding	lifted_all.ident	chrV_pilon.g15017
WBGene00000055|F25G6.3|acr-16	protein_coding	lifted_all.ident	chrV_pilon.g15018
WBGene00000056|F53E10.2|acr-17	protein_coding	lifted_all.ident	chrV_pilon.g13505
WBGene00000057|F28F8.1|acr-18	protein_coding	lifted_all.ident	chrV_pilon.g16847
WBGene00000058|C31H5.3|acr-19	protein_coding	lifted_all.ident	chrI_pilon.g1731
WBGene00000059|R06A4.10|acr-20	protein_coding	lifted_all.ident	chrII_pilon.g6527
WBGene00000060|F27B3.2|acr-21	protein_coding	lifted_all.ident	chrIII_pilon.g7974
WBGene00000061|F48E3.7|lgc-11	protein_coding	lifted_all.ident	chrX_pilon.g19421
WBGene00000062|F59B1.9|acr-23	protein_coding	lifted_all.ident	chrV_pilon.g13806
WBGene00000063|T04C12.6|act-1	protein_coding	lifted_all.ident	chrV_pilon.g15681
WBGene00000064|T04C12.5|act-2	protein_coding	lifted_all.ident	chrV_pilon.g15680
WBGene00000065|T04C12.4|act-3	protein_coding	lifted_all.ident	chrV_pilon.g15679
WBGene00000066|M03F4.2|act-4	protein_coding	lifted_all.ident	chrX_pilon.g18989
WBGene00000067|T25C8.2|act-5	protein_coding	lifted_all.ident	chrIII_pilon.g9389
WBGene00000068|F17C8.1|acy-1	protein_coding	lifted_all.ident	chrIII_pilon.g7523
WBGene00000069|C10F3.3|acy-2	protein_coding	lifted_all.ident	chrV_pilon.g14353
WBGene00000070|C44F1.5|acy-3	protein_coding	lifted_all.ident	chrIII_pilon.g7316
WBGene00000071|T01C2.1|acy-4	protein_coding	lifted_no.ident	chrV_pilon.g14282
WBGene00000072|F39C12.2|add-1	protein_coding	lifted_all.ident	chrX_pilon.g18976
WBGene00000073|F57F5.4|add-2	protein_coding	lifted_all.ident	chrV_pilon.g15902
WBGene00000074|C04A11.4|adm-2	protein_coding	lifted_all.ident	chrX_pilon.g20462
WBGene00000075|ZK154.7|adm-4	protein_coding	lifted_all.ident	chrX_pilon.g19469
WBGene00000079|H15N14.1|adr-1	protein_coding	lifted_all.ident	chrI_pilon.g1453
WBGene00000080|T20H4.4|adr-2	protein_coding	lifted_all.ident	chrIII_pilon.g8116
WBGene00000081|Y50D7A.7|ads-1	protein_coding	lifted_all.ident	chrIII_pilon.g6742
WBGene00000082|C02B4.1|adt-1	protein_coding	lifted_all.ident	chrX_pilon.g20296
WBGene00000083|F08C6.1|adt-2	protein_coding	lifted_all.ident	chrX_pilon.g19437
WBGene00000084|D2030.10|aex-1	protein_coding	lifted_all.ident	chrI_pilon.g1423
WBGene00000085|T14B1.2|aex-2	protein_coding	lifted_all.ident	chrX_pilon.g19775
WBGene00000086|C02H7.3|aex-3	protein_coding	lifted_all.ident	chrX_pilon.g18320
WBGene00000088|F32A7.6|aex-5	protein_coding	lifted_all.ident	chrI_pilon.g2980
WBGene00000089|Y87G2A.4|aex-6	protein_coding	lifted_all.ident	chrI_pilon.g2748
WBGene00000090|B0334.8|age-1	protein_coding	lifted_all.ident	chrII_pilon.g5970; chrII_pilon.g5972
WBGene00000092|F32A6.4|ags-3	protein_coding	lifted_all.ident	chrX_pilon.g19052
WBGene00000093|Y62E10A.5|agt-1	protein_coding	lifted_all.ident	chrIV_pilon.g12283
WBGene00000094|F09E5.13|agt-2	protein_coding	lifted_all.ident	chrII_pilon.g4475
WBGene00000095|C25A1.11|aha-1	protein_coding	lifted_all.ident	chrI_pilon.g1993
WBGene00000096|C41G7.5|ahr-1	protein_coding	lifted_all.ident	chrI_pilon.g1831; chrI_pilon.g1833
WBGene00000097|F58E10.4|aip-1	protein_coding	lifted_all.ident	chrV_pilon.g16401
WBGene00000098|K07C11.2|air-1	protein_coding	lifted_all.ident	chrV_pilon.g14934
WBGene00000099|B0207.4|air-2	protein_coding	lifted_all.ident	chrI_pilon.g1026
WBGene00000100|C25A11.4|ajm-1	protein_coding	lifted_all.ident	chrX_pilon.g19688
WBGene00000101|D1022.7|aka-1	protein_coding	lifted_all.ident	chrII_pilon.g5028
WBGene00000102|C12D8.10|akt-1	protein_coding	lifted_all.ident	chrV_pilon.g15468
WBGene00000103|F28H6.1|akt-2	protein_coding	lifted_all.ident	chrX_pilon.g20529
WBGene00000105|F48F7.1|alg-1	protein_coding	lifted_all.ident	chrX_pilon.g20496
WBGene00000106|T07D3.7|alg-2	protein_coding	lifted_all.ident	chrII_pilon.g3217
WBGene00000107|F54D8.3|alh-1	protein_coding	lifted_all.ident	chrIII_pilon.g7636
WBGene00000108|K04F1.15|alh-2	protein_coding	lifted_bad.trans
WBGene00000109|F36H1.6|alh-3	protein_coding	lifted_all.ident	chrIV_pilon.g11744
WBGene00000110|T05H4.13|alh-4	protein_coding	lifted_all.ident	chrV_pilon.g14432
WBGene00000111|T08B1.3|alh-5	protein_coding	lifted_all.ident	chrV_pilon.g13352
WBGene00000112|F56D12.1|alh-6	protein_coding	lifted_all.ident	chrII_pilon.g3328
WBGene00000113|F45H10.1|alh-7	protein_coding	lifted_all.ident	chrII_pilon.g6370
WBGene00000114|F13D12.4|alh-8	protein_coding	lifted_all.ident	chrII_pilon.g6022
WBGene00000115|F01F1.6|alh-9	protein_coding	lifted_all.ident	chrIII_pilon.g7806
WBGene00000116|C54D1.4|alh-10	protein_coding	lifted_all.ident	chrX_pilon.g19356
WBGene00000117|F42G9.5|alh-11	protein_coding	lifted_all.ident	chrIII_pilon.g6814
WBGene00000118|Y69F12A.2|alh-12	protein_coding	lifted_all.ident	chrIII_pilon.g8161
WBGene00000120|C01F6.5|aly-1	protein_coding	lifted_all.ident	chrIV_pilon.g11239
WBGene00000121|F23B2.6|aly-2	protein_coding	lifted_all.ident	chrIV_pilon.g11245
WBGene00000122|M18.7|aly-3	protein_coding	lifted_all.ident	chrIV_pilon.g12006
WBGene00000123|F36A4.7|ama-1	protein_coding	lifted_all.ident	chrIV_pilon.g10157
WBGene00000133|C05E11.4|amt-1	protein_coding	lifted_all.ident	chrX_pilon.g18936
WBGene00000134|F49E11.3|amt-2	protein_coding	lifted_all.ident	chrIV_pilon.g12199
WBGene00000135|M195.3|amt-3	protein_coding	lifted_all.ident	chrII_pilon.g5226
WBGene00000136|C05E11.5|amt-4	protein_coding	lifted_all.ident	chrX_pilon.g18935
WBGene00000137|R13G10.2|amx-1	protein_coding	lifted_all.ident	chrIII_pilon.g7321
WBGene00000138|B0019.1|amx-2	protein_coding	lifted_all.ident	chrI_pilon.g2591
WBGene00000139|F25C8.2|amx-3	protein_coding	lifted_all.ident	chrV_pilon.g18190
WBGene00000140|ZK973.6|anc-1	protein_coding	lifted_no.ident	chrI_pilon.g686
WBGene00000142|C08B6.9|aos-1	protein_coding	lifted_all.ident	chrV_pilon.g15427
WBGene00000143|K06H7.6|apc-2	protein_coding	lifted_all.ident	chrIII_pilon.g8301
WBGene00000144|F15H10.3|apc-10	protein_coding	lifted_all.ident	chrV_pilon.g15518
WBGene00000145|F35G12.9|apc-11	protein_coding	lifted_all.ident	chrIII_pilon.g7486
WBGene00000146|F46F3.4|ape-1	protein_coding	lifted_all.ident	chrV_pilon.g15836
WBGene00000147|VF36H2L.1|aph-1	protein_coding	lifted_all.ident	chrI_pilon.g1765
WBGene00000148|ZC434.6|aph-2	protein_coding	lifted_all.ident	chrI_pilon.g2019
WBGene00000149|C42D8.8|apl-1	protein_coding	lifted_all.ident	chrX_pilon.g19019
WBGene00000150|F55A12.7|apm-1	protein_coding	lifted_all.ident	chrI_pilon.g894
WBGene00000151|T05H10.2|apn-1	protein_coding	lifted_all.ident	chrII_pilon.g5147
WBGene00000155|W03G9.4|app-1	protein_coding	lifted_all.ident	chrI_pilon.g810
WBGene00000156|K04G2.8|apr-1	protein_coding	lifted_all.ident	chrI_pilon.g1515
WBGene00000157|F02E8.3|aps-2	protein_coding	lifted_all.ident	chrX_pilon.g18920
WBGene00000158|Y105E8A.9|apg-1	protein_coding	lifted_all.ident	chrI_pilon.g2910
WBGene00000159|F29G9.3|aps-1	protein_coding	lifted_all.ident	chrV_pilon.g14360
WBGene00000160|Y71H2B.10|apb-1	protein_coding	lifted_all.ident	chrIII_pilon.g7132; chrIII_pilon.g7134
WBGene00000161|T20B5.1|apa-2	protein_coding	lifted_all.ident	chrX_pilon.g19733
WBGene00000162|W09G10.4|apd-3	protein_coding	lifted_all.ident	chrII_pilon.g4019
WBGene00000163|R11A5.1|apb-3	protein_coding	lifted_all.ident	chrI_pilon.g1468
WBGene00000164|F53H8.1|apm-3	protein_coding	lifted_all.ident	chrX_pilon.g18356
WBGene00000165|Y48G8AL.14|aps-3	protein_coding	lifted_all.ident	chrI_pilon.g165
WBGene00000166|W04G3.4|apt-9	protein_coding	lifted_all.ident	chrX_pilon.g20000
WBGene00000168|K08D9.3|apx-1	protein_coding	lifted_all.ident	chrV_pilon.g13674
WBGene00000169|F32A5.5|aqp-1	protein_coding	lifted_all.ident	chrII_pilon.g4976
WBGene00000170|C01G6.1|aqp-2	protein_coding	lifted_all.ident	chrII_pilon.g5441
WBGene00000171|Y69E1A.7|aqp-3	protein_coding	lifted_all.ident	chrIV_pilon.g11731
WBGene00000172|F40F9.9|aqp-4	protein_coding	lifted_all.ident	chrV_pilon.g15325
WBGene00000173|C35A5.1|aqp-5	protein_coding	lifted_all.ident	chrV_pilon.g15533
WBGene00000174|C32C4.2|aqp-6	protein_coding	lifted_all.ident	chrV_pilon.g15576
WBGene00000175|M02F4.8|aqp-7	protein_coding	lifted_no.ident	chrX_pilon.g18687
WBGene00000176|K02G10.7|aqp-8	protein_coding	lifted_all.ident	chrX_pilon.g18956
WBGene00000177|K07A1.16|aqp-9	protein_coding	lifted_all.ident	chrI_pilon.g1854
WBGene00000178|ZK1321.3|aqp-10	protein_coding	lifted_all.ident	chrII_pilon.g5587
WBGene00000179|ZK525.2|aqp-11	protein_coding	lifted_all.ident	chrIII_pilon.g9402
WBGene00000180|ZK1320.6|arc-1	protein_coding	lifted_all.ident	chrII_pilon.g5566
WBGene00000181|F01G4.2|ard-1	protein_coding	lifted_all.ident	chrIV_pilon.g11779
WBGene00000182|B0336.2|arf-1.2	protein_coding	lifted_all.ident	chrIII_pilon.g7776
WBGene00000183|F57H12.1|arf-3	protein_coding	lifted_all.ident	chrIV_pilon.g10970
WBGene00000184|Y116A8C.12|arf-6	protein_coding	lifted_all.ident	chrIV_pilon.g12803
WBGene00000185|F31A9.3|arg-1	protein_coding	lifted_all.ident	chrX_pilon.g18504
WBGene00000186|C01C7.1|ark-1	protein_coding	lifted_all.ident	chrIV_pilon.g12120
WBGene00000187|F54C9.10|arl-1	protein_coding	lifted_all.ident	chrII_pilon.g5291
WBGene00000188|F19H8.3|arl-3	protein_coding	lifted_all.ident	chrII_pilon.g6580
WBGene00000189|ZK632.8|arl-5	protein_coding	lifted_all.ident	chrIII_pilon.g8717
WBGene00000190|F45E4.1|arf-1.1	protein_coding	lifted_all.ident	chrIV_pilon.g10881
WBGene00000192|Y57G11C.13|arl-8	protein_coding	lifted_all.ident	chrIV_pilon.g12539
WBGene00000193|C38D4.8|arl-6	protein_coding	lifted_all.ident	chrIII_pilon.g7548
WBGene00000195|F53H8.2|arr-1	protein_coding	lifted_all.ident	chrX_pilon.g18355
WBGene00000196|W02B12.6|aars-1	protein_coding	lifted_all.ident	chrII_pilon.g5948
WBGene00000197|F28H1.3|aars-2	protein_coding	lifted_all.ident	chrI_pilon.g625
WBGene00000198|C15F1.6|art-1	protein_coding	lifted_all.ident	chrII_pilon.g4904
WBGene00000199|Y71F9AL.16|arx-1	protein_coding	lifted_all.ident	chrI_pilon.g415; chrI_pilon.g419
WBGene00000200|K07C5.1|arx-2	protein_coding	lifted_all.ident	chrV_pilon.g15490
WBGene00000201|Y79H2A.6|arx-3	protein_coding	lifted_all.ident	chrIII_pilon.g9137
WBGene00000202|Y6D11A.1|exos-4.2	protein_coding	lifted_all.ident	chrIII_pilon.g6833
WBGene00000203|Y37D8A.1|arx-5	protein_coding	lifted_all.ident	chrIII_pilon.g9242
WBGene00000204|C35D10.16|arx-6	protein_coding	lifted_all.ident	chrIII_pilon.g7575
WBGene00000205|M01B12.3|arx-7	protein_coding	lifted_all.ident	chrI_pilon.g453
WBGene00000206|F35G12.10|asb-1	protein_coding	lifted_all.ident	chrIII_pilon.g7487
WBGene00000207|F02E8.1|asb-2	protein_coding	lifted_all.ident	chrX_pilon.g18923
WBGene00000208|Y53F4B.15|trip-4	protein_coding	lifted_all.ident	chrII_pilon.g6651
WBGene00000209|K07A12.3|asg-1	protein_coding	lifted_all.ident	chrI_pilon.g1650
WBGene00000210|C53B7.4|asg-2	protein_coding	lifted_all.ident	chrX_pilon.g19309
WBGene00000211|B0252.2|asm-1	protein_coding	lifted_all.ident	chrII_pilon.g4892
WBGene00000212|ZK455.4|asm-2	protein_coding	lifted_all.ident	chrX_pilon.g20053
WBGene00000213|W03G1.7|asm-3	protein_coding	lifted_all.ident	chrIV_pilon.g9520
WBGene00000214|Y39B6A.20|asp-1	protein_coding	lifted_all.ident	chrV_pilon.g17812
WBGene00000215|T18H9.2|asp-2	protein_coding	lifted_all.ident	chrV_pilon.g15198
WBGene00000216|H22K11.1|asp-3	protein_coding	lifted_all.ident	chrX_pilon.g19301
WBGene00000217|R12H7.2|asp-4	protein_coding	lifted_all.ident	chrX_pilon.g20364
WBGene00000218|F21F8.3|asp-5	protein_coding	lifted_all.ident	chrV_pilon.g14948
WBGene00000219|F21F8.7|asp-6	protein_coding	lifted_all.ident	chrV_pilon.g14946
WBGene00000220|K08F8.2|atf-2	protein_coding	lifted_all.ident	chrII_pilon.g5335
WBGene00000221|T04C10.4|atf-5	protein_coding	lifted_all.ident	chrX_pilon.g20647
WBGene00000222|F45E6.2|atf-6	protein_coding	lifted_all.ident	chrX_pilon.g20273
WBGene00000223|C07G2.2|atf-7	protein_coding	lifted_all.ident	chrIII_pilon.g7464
WBGene00000224|F26D10.9|atgp-1	protein_coding	lifted_all.ident	chrIV_pilon.g12861
WBGene00000225|C38C6.2|atgp-2	protein_coding	lifted_all.ident	chrII_pilon.g6586
WBGene00000226|T06E4.3|atl-1	protein_coding	lifted_all.ident	chrV_pilon.g15299
WBGene00000227|Y48G1BL.2|atm-1	protein_coding	lifted_all.ident	chrI_pilon.g31
WBGene00000228|W04D2.1|atn-1	protein_coding	lifted_all.ident	chrV_pilon.g16024
WBGene00000229|C34E10.6|atp-2	protein_coding	lifted_all.ident	chrIII_pilon.g7670
WBGene00000230|F27C1.7|atp-3	protein_coding	lifted_all.ident	chrI_pilon.g914
WBGene00000231|D2045.1|atx-2	protein_coding	lifted_all.ident	chrIII_pilon.g8873
WBGene00000232|B0207.12|avr-14	protein_coding	lifted_all.ident	chrI_pilon.g1034
WBGene00000233|R11G10.1|avr-15	protein_coding	lifted_all.ident	chrV_pilon.g16260
WBGene00000235|B0464.7|baf-1	protein_coding	lifted_all.ident	chrIII_pilon.g8625
WBGene00000236|F57B10.11|bag-1	protein_coding	lifted_all.ident	chrI_pilon.g1193
WBGene00000237|Y71F9AR.1|bam-2	protein_coding	lifted_all.ident	chrI_pilon.g436
WBGene00000238|C54D1.6|bar-1	protein_coding	lifted_all.ident	chrX_pilon.g19360
WBGene00000239|C05D2.4|bas-1	protein_coding	lifted_all.ident	chrIII_pilon.g7752
WBGene00000240|K08F8.4|pah-1	protein_coding	lifted_all.ident	chrII_pilon.g5337
WBGene00000241|Y105E8A.5|bbs-1	protein_coding	lifted_all.ident	chrI_pilon.g2905
WBGene00000242|F20D12.3|bbs-2	protein_coding	lifted_all.ident	chrIV_pilon.g10959
WBGene00000244|T25F10.5|bbs-8	protein_coding	lifted_all.ident	chrV_pilon.g14508
WBGene00000245|T13C5.5|bca-1	protein_coding	lifted_all.ident	chrX_pilon.g19191
WBGene00000246|M7.3|bcc-1	protein_coding	lifted_all.ident	chrIV_pilon.g11763
WBGene00000247|T19E7.3|bec-1	protein_coding	lifted_all.ident	chrIV_pilon.g10484
WBGene00000248|C54C6.2|ben-1	protein_coding	lifted_all.ident	chrIII_pilon.g7274
WBGene00000249|T27F2.3|bir-1	protein_coding	lifted_all.ident	chrV_pilon.g15830
WBGene00000250|C50B8.2|bir-2	protein_coding	lifted_all.ident	chrV_pilon.g16274
WBGene00000251|C09G5.6|bli-1	protein_coding	lifted_all.ident	chrII_pilon.g5798
WBGene00000252|F59E12.12|bli-2	protein_coding	lifted_all.ident	chrII_pilon.g4572
WBGene00000253|F56C11.1|bli-3	protein_coding	lifted_all.ident	chrI_pilon.g26
WBGene00000254|K04F10.4|bli-4	protein_coding	lifted_all.ident	chrI_pilon.g1133; chrI_pilon.g1135
WBGene00000255|F45G2.5|bli-5	protein_coding	lifted_all.ident	chrIII_pilon.g9352
WBGene00000256|Y73B6BL.34|bli-6	protein_coding	lifted_all.ident	chrIV_pilon.g10613
WBGene00000257|F23B12.8|bmk-1	protein_coding	lifted_all.ident	chrV_pilon.g16530
WBGene00000259|F13H8.10|bpl-1	protein_coding	lifted_all.ident	chrII_pilon.g4723
WBGene00000262|F54B11.6|bra-1	protein_coding	lifted_all.ident	chrX_pilon.g20447
WBGene00000263|F23H11.5	protein_coding	lifted_all.ident	chrIII_pilon.g6846
WBGene00000264|C36A4.8|brc-1	protein_coding	lifted_all.ident	chrIII_pilon.g7331
WBGene00000265|K04C2.4|brd-1	protein_coding	lifted_all.ident	chrIII_pilon.g8021
WBGene00000266|C53B4.7|bre-1	protein_coding	lifted_all.ident	chrIV_pilon.g11210
WBGene00000267|Y39E4B.9|bre-2	protein_coding	lifted_all.ident	chrIII_pilon.g9291
WBGene00000268|B0464.4|bre-3	protein_coding	lifted_all.ident	chrIII_pilon.g8627
WBGene00000269|Y73E7A.7|bre-4	protein_coding	lifted_all.ident	chrI_pilon.g215
WBGene00000270|T12G3.8|bre-5	protein_coding	lifted_all.ident	chrIV_pilon.g11985
WBGene00000271|F45E12.2|brf-1	protein_coding	lifted_all.ident	chrII_pilon.g4989
WBGene00000272|F56A3.5|bro-1	protein_coding	lifted_all.ident	chrI_pilon.g862
WBGene00000273|Y79H2A.1|brp-1	protein_coding	lifted_all.ident	chrIII_pilon.g9132
WBGene00000274|F15D4.1|btf-1	protein_coding	lifted_all.ident	chrII_pilon.g6337
WBGene00000275|R06C7.8|bub-1	protein_coding	lifted_all.ident	chrI_pilon.g1348
WBGene00000276|F57B9.5|byn-1	protein_coding	lifted_all.ident	chrIII_pilon.g8033; chrIII_pilon.g8035
WBGene00000277|C23H4.1|cab-1	protein_coding	lifted_all.ident	chrX_pilon.g20206
WBGene00000279|F54D8.4|cah-1	protein_coding	lifted_all.ident	chrIII_pilon.g7638
WBGene00000280|D1022.8|cah-2	protein_coding	lifted_all.ident	chrII_pilon.g5030
WBGene00000281|K05G3.3|cah-3	protein_coding	lifted_all.ident	chrX_pilon.g20887
WBGene00000282|R01E6.3|cah-4	protein_coding	lifted_all.ident	chrX_pilon.g20435
WBGene00000283|R173.1|cah-5	protein_coding	lifted_all.ident	chrX_pilon.g19339
WBGene00000284|T28F2.3|cah-6	protein_coding	lifted_all.ident	chrI_pilon.g542
WBGene00000285|C13C12.1|cal-1	protein_coding	lifted_all.ident	chrV_pilon.g16035
WBGene00000286|C18E9.1|cal-2	protein_coding	lifted_all.ident	chrII_pilon.g5378
WBGene00000287|M02B7.6|cal-3	protein_coding	lifted_all.ident	chrIV_pilon.g10044
WBGene00000288|T07G12.1|cal-4	protein_coding	lifted_all.ident	chrIV_pilon.g11613
WBGene00000289|C01G6.8|cam-1	protein_coding	lifted_all.ident	chrII_pilon.g5449
WBGene00000292|D2024.6|cap-1	protein_coding	lifted_all.ident	chrIV_pilon.g10794
WBGene00000293|M106.5|cap-2	protein_coding	lifted_all.ident	chrII_pilon.g5825
WBGene00000294|F41G4.2|cas-1	protein_coding	lifted_all.ident	chrX_pilon.g20925
WBGene00000295|W01C8.6|cat-1	protein_coding	lifted_all.ident	chrX_pilon.g19109
WBGene00000296|B0432.5|cat-2	protein_coding	lifted_all.ident	chrII_pilon.g3071
WBGene00000298|F32G8.6|cat-4	protein_coding	lifted_all.ident	chrV_pilon.g15554
WBGene00000301|T13F2.8|cav-1	protein_coding	lifted_all.ident	chrIV_pilon.g11406
WBGene00000302|C56A3.7|cav-2	protein_coding	lifted_all.ident	chrV_pilon.g16269
WBGene00000366|R10E11.1|cbp-1	protein_coding	lifted_all.ident	chrIII_pilon.g8699
WBGene00000367|C54D2.5|cca-1	protein_coding	lifted_all.ident	chrX_pilon.g19478
WBGene00000368|T28F2.5|ccb-1	protein_coding	lifted_all.ident	chrI_pilon.g546
WBGene00000369|Y56A3A.20|ccf-1	protein_coding	lifted_all.ident	chrIII_pilon.g9121
WBGene00000370|Y73F8A.6|ccg-1	protein_coding	lifted_all.ident	chrIV_pilon.g12608
WBGene00000371|F26E4.9|cox-5B	protein_coding	lifted_all.ident	chrI_pilon.g1909
WBGene00000372|T10B9.10|cyp-13A7	protein_coding	lifted_all.ident	chrII_pilon.g5597
WBGene00000373|F08F3.7|cyp-14A5	protein_coding	lifted_all.ident	chrV_pilon.g14236
WBGene00000375|ZK177.5|cyp-44A1	protein_coding	lifted_all.ident	chrII_pilon.g4520
WBGene00000376|ZC518.3|ccr-4	protein_coding	lifted_all.ident	chrIV_pilon.g12055; chrIV_pilon.g12056
WBGene00000377|T05C12.7|cct-1	protein_coding	lifted_all.ident	chrII_pilon.g5183
WBGene00000378|T21B10.7|cct-2	protein_coding	lifted_all.ident	chrII_pilon.g5370
WBGene00000379|K01C8.10|cct-4	protein_coding	lifted_all.ident	chrII_pilon.g5211
WBGene00000380|C07G2.3|cct-5	protein_coding	lifted_all.ident	chrIII_pilon.g7466
WBGene00000381|F01F1.8|cct-6	protein_coding	lifted_all.ident	chrIII_pilon.g7805
WBGene00000382|C43E11.10|cdc-6	protein_coding	lifted_all.ident	chrI_pilon.g680
WBGene00000383|C17G10.4|cdc-14	protein_coding	lifted_all.ident	chrII_pilon.g4552
WBGene00000386|K06A5.7|cdc-25.1	protein_coding	lifted_all.ident	chrI_pilon.g1162
WBGene00000387|F16B4.8|cdc-25.2	protein_coding	lifted_all.ident	chrV_pilon.g13249
WBGene00000388|ZK637.11|cdc-25.3	protein_coding	lifted_all.ident	chrIII_pilon.g8503
WBGene00000389|R05H5.2|cdc-25.4	protein_coding	lifted_all.ident	chrII_pilon.g5680
WBGene00000390|R07G3.1|cdc-42	protein_coding	lifted_all.ident	chrII_pilon.g5065
WBGene00000391|C47D2.2|cdd-1	protein_coding	lifted_all.ident	chrX_pilon.g19534
WBGene00000392|F49E8.4|cdd-2	protein_coding	lifted_all.ident	chrIV_pilon.g10862
WBGene00000393|C15B12.7|cdf-1	protein_coding	lifted_all.ident	chrX_pilon.g19253
WBGene00000395|ZK112.7|cdh-3	protein_coding	lifted_all.ident	chrIII_pilon.g8215
WBGene00000396|F25F2.2|cdh-4	protein_coding	lifted_bad.trans	chrIII_pilon.g7469
WBGene00000397|F08B4.2|cdh-5	protein_coding	lifted_all.ident	chrIV_pilon.g11130
WBGene00000399|R05H10.6|cdh-7	protein_coding	lifted_all.ident	chrII_pilon.g6621
WBGene00000401|F59C12.1|cdh-9	protein_coding	lifted_all.ident	chrX_pilon.g20898
WBGene00000402|C45G7.5|cdh-10	protein_coding	lifted_all.ident	chrIV_pilon.g9804; chrIV_pilon.g9805
WBGene00000403|B0034.3|casy-1	protein_coding	lifted_all.ident	chrII_pilon.g4652
WBGene00000405|T05G5.3|cdk-1	protein_coding	lifted_all.ident	chrIII_pilon.g8691
WBGene00000406|F18H3.5|cdk-4	protein_coding	lifted_all.ident	chrX_pilon.g20427
WBGene00000407|T27E9.3|cdk-5	protein_coding	lifted_all.ident	chrIII_pilon.g9364
WBGene00000408|Y39G10AL.3|cdk-7	protein_coding	lifted_all.ident	chrI_pilon.g309
WBGene00000409|F39H11.3|cdk-8	protein_coding	lifted_all.ident	chrI_pilon.g1655
WBGene00000410|H25P06.2|cdk-9	protein_coding	lifted_all.ident	chrI_pilon.g2248
WBGene00000411|R06F6.1|cdl-1	protein_coding	lifted_all.ident	chrII_pilon.g5806
WBGene00000412|F35E8.11|cdr-1	protein_coding	lifted_all.ident	chrV_pilon.g16972
WBGene00000413|Y54E10A.15|cdt-1	protein_coding	lifted_all.ident	chrI_pilon.g479
WBGene00000414|ZK1236.2|cec-1	protein_coding	lifted_all.ident	chrIII_pilon.g8401
WBGene00000415|Y47H9C.4|ced-1	protein_coding	lifted_all.ident	chrI_pilon.g2352
WBGene00000416|Y41D4B.13|ced-2	protein_coding	lifted_all.ident	chrIV_pilon.g9703
WBGene00000417|C48D1.2|ced-3	protein_coding	lifted_all.ident	chrIV_pilon.g12242
WBGene00000418|C35D10.9|ced-4	protein_coding	lifted_all.ident	chrIII_pilon.g7562
WBGene00000419|C02F4.1|ced-5	protein_coding	lifted_all.ident	chrIV_pilon.g11609
WBGene00000420|F56D2.7|ced-6	protein_coding	lifted_all.ident	chrIII_pilon.g7747
WBGene00000421|C48B4.4|ced-7	protein_coding	lifted_all.ident	chrIII_pilon.g8655
WBGene00000422|F08F1.5|ced-8	protein_coding	lifted_all.ident	chrX_pilon.g19574
WBGene00000423|T07C4.8|ced-9	protein_coding	lifted_all.ident	chrIII_pilon.g8849
WBGene00000424|C09G12.8|ced-10	protein_coding	lifted_all.ident	chrIV_pilon.g9988
WBGene00000425|ZK512.3|ced-11	protein_coding	lifted_all.ident	chrIII_pilon.g8550
WBGene00000426|Y106G6E.5|ced-12	protein_coding	lifted_all.ident	chrI_pilon.g1998
WBGene00000427|R09F10.9|ced-13	protein_coding	lifted_all.ident	chrX_pilon.g19552
WBGene00000428|F16H11.4|ceh-1	protein_coding	lifted_all.ident	chrX_pilon.g18949
WBGene00000429|C27A12.5|ceh-2	protein_coding	lifted_all.ident	chrI_pilon.g1054
WBGene00000430|C16C2.1|ceh-5	protein_coding	lifted_all.ident	chrI_pilon.g1895
WBGene00000431|K02B12.1|ceh-6	protein_coding	lifted_all.ident	chrI_pilon.g1602
WBGene00000432|C34C6.8|ceh-7	protein_coding	lifted_all.ident	chrII_pilon.g5322
WBGene00000433|ZK265.4|ceh-8	protein_coding	lifted_all.ident	chrI_pilon.g1545
WBGene00000434|Y65B4BR.9|ceh-9	protein_coding	lifted_all.ident	chrI_pilon.g90
WBGene00000435|W03A3.1|ceh-10	protein_coding	lifted_all.ident	chrIII_pilon.g7793
WBGene00000436|F33D11.4|ceh-12	protein_coding	lifted_all.ident	chrI_pilon.g1007
WBGene00000437|R13A5.5|ceh-13	protein_coding	lifted_all.ident	chrIII_pilon.g8180
WBGene00000438|F46C8.5|ceh-14	protein_coding	lifted_all.ident	chrX_pilon.g19424
WBGene00000439|C13G5.1|ceh-16	protein_coding	lifted_all.ident	chrIII_pilon.g8434
WBGene00000440|D1007.1|ceh-17	protein_coding	lifted_all.ident	chrI_pilon.g725
WBGene00000441|ZC64.3|ceh-18	protein_coding	lifted_all.ident	chrX_pilon.g18828
WBGene00000442|F20D12.6|ceh-19	protein_coding	lifted_all.ident	chrIV_pilon.g10963
WBGene00000443|F31E3.1|ceh-20	protein_coding	lifted_all.ident	chrIII_pilon.g8046
WBGene00000444|T26C11.6|ceh-21	protein_coding	lifted_all.ident	chrX_pilon.g18516
WBGene00000445|F29F11.5|ceh-22	protein_coding	lifted_all.ident	chrV_pilon.g15581
WBGene00000446|ZK652.5|ceh-23	protein_coding	lifted_all.ident	chrIII_pilon.g8231
WBGene00000447|F55B12.1|ceh-24	protein_coding	lifted_all.ident	chrV_pilon.g16333
WBGene00000448|K12H4.1|pros-1	protein_coding	lifted_all.ident	chrIII_pilon.g8299
WBGene00000449|F46F3.1|ceh-27	protein_coding	lifted_all.ident	chrV_pilon.g15833
WBGene00000450|K03A11.3|ceh-28	protein_coding	lifted_all.ident	chrX_pilon.g20344
WBGene00000451|C33D12.7|ceh-30	protein_coding	lifted_all.ident	chrX_pilon.g18694
WBGene00000452|C33D12.1|ceh-31	protein_coding	lifted_all.ident	chrX_pilon.g18695
WBGene00000453|W05E10.3|ceh-32	protein_coding	lifted_all.ident	chrV_pilon.g15840
WBGene00000454|C10G8.7|ceh-33	protein_coding	lifted_all.ident	chrV_pilon.g14215
WBGene00000455|C10G8.6|ceh-34	protein_coding	lifted_all.ident	chrV_pilon.g14214
WBGene00000457|C37E2.4|ceh-36	protein_coding	lifted_all.ident	chrX_pilon.g20537
WBGene00000458|C37E2.5|ceh-37	protein_coding	lifted_all.ident	chrX_pilon.g20538
WBGene00000459|F22D3.1|ceh-38	protein_coding	lifted_all.ident	chrII_pilon.g4900
WBGene00000460|T26C11.7|ceh-39	protein_coding	lifted_all.ident	chrX_pilon.g18518
WBGene00000461|F17A2.5|ceh-40	protein_coding	lifted_all.ident	chrX_pilon.g20233
WBGene00000462|T26C11.5|ceh-41	protein_coding	lifted_all.ident	chrX_pilon.g18515
WBGene00000463|C28A5.4|ceh-43	protein_coding	lifted_all.ident	chrIII_pilon.g7457
WBGene00000464|Y54F10AM.4|ceh-44	protein_coding	lifted_all.ident	chrIII_pilon.g7123; chrIII_pilon.g7124
WBGene00000465|C07G2.1|cpg-1	protein_coding	lifted_all.ident	chrIII_pilon.g7463
WBGene00000466|C03D6.3|cel-1	protein_coding	lifted_all.ident	chrI_pilon.g1877
WBGene00000467|F52B5.5|cep-1	protein_coding	lifted_all.ident	chrI_pilon.g1560
WBGene00000468|F43G9.11|ces-1	protein_coding	lifted_all.ident	chrI_pilon.g1633
WBGene00000469|ZK909.4|ces-2	protein_coding	lifted_all.ident	chrI_pilon.g2994
WBGene00000472|F33A8.3|cey-1	protein_coding	lifted_all.ident	chrII_pilon.g5863
WBGene00000473|F46F11.2|cey-2	protein_coding	lifted_all.ident	chrI_pilon.g960
WBGene00000474|M01E11.5|cey-3	protein_coding	lifted_all.ident	chrI_pilon.g950
WBGene00000475|Y39A1C.3|cey-4	protein_coding	lifted_all.ident	chrIII_pilon.g8953
WBGene00000476|T23D8.8|cfi-1	protein_coding	lifted_all.ident	chrI_pilon.g1950
WBGene00000477|C18C4.2|cft-1	protein_coding	lifted_all.ident	chrV_pilon.g14262
WBGene00000478|F27E11.3|cfz-2	protein_coding	lifted_all.ident	chrV_pilon.g13749
WBGene00000479|C07H6.5|cgh-1	protein_coding	lifted_all.ident	chrIII_pilon.g8171
WBGene00000480|Y38C9A.2|cgp-1	protein_coding	lifted_all.ident	chrV_pilon.g12935
WBGene00000481|ZC416.8|cha-1	protein_coding	lifted_all.ident	chrIV_pilon.g10011
WBGene00000482|T14G8.1|chd-3	protein_coding	lifted_all.ident	chrX_pilon.g20317
WBGene00000483|C55B7.12|che-1	protein_coding	lifted_all.ident	chrI_pilon.g1176
WBGene00000484|F38G1.1|che-2	protein_coding	lifted_all.ident	chrX_pilon.g18279
WBGene00000485|F18C12.1|che-3	protein_coding	lifted_all.ident	chrI_pilon.g1519
WBGene00000487|C23H5.7|che-6	protein_coding	lifted_all.ident	chrIV_pilon.g9766
WBGene00000488|F26D11.10|che-7	protein_coding	lifted_all.ident	chrV_pilon.g14865
WBGene00000490|C27A7.4|che-11	protein_coding	lifted_all.ident	chrV_pilon.g15935
WBGene00000491|B0024.8|che-12	protein_coding	lifted_all.ident	chrV_pilon.g15482
WBGene00000492|F59C6.7|che-13	protein_coding	lifted_all.ident	chrI_pilon.g2057
WBGene00000493|F56H1.1|che-14	protein_coding	lifted_all.ident	chrI_pilon.g987
WBGene00000496|T25G3.2|chs-1	protein_coding	lifted_all.ident	chrI_pilon.g1409
WBGene00000497|F48A11.1|chs-2	protein_coding	lifted_all.ident	chrII_pilon.g3065
WBGene00000498|Y39H10A.7|chk-1	protein_coding	lifted_all.ident	chrV_pilon.g13819
WBGene00000499|Y60A3A.12|chk-2	protein_coding	lifted_all.ident	chrV_pilon.g17986
WBGene00000500|T09B4.10|chn-1	protein_coding	lifted_all.ident	chrI_pilon.g1090
WBGene00000501|C48D1.3|cho-1	protein_coding	lifted_all.ident	chrIV_pilon.g12243
WBGene00000502|Y110A7A.13|chp-1	protein_coding	lifted_all.ident	chrI_pilon.g838
WBGene00000503|C04F6.3|cht-1	protein_coding	lifted_all.ident	chrX_pilon.g18751
WBGene00000506|H14E04.5|cic-1	protein_coding	lifted_all.ident	chrIII_pilon.g7096
WBGene00000507|F44B9.4|cit-1.1	protein_coding	lifted_all.ident	chrIII_pilon.g8284
WBGene00000508|F44B9.3|cit-1.2	protein_coding	lifted_all.ident	chrIII_pilon.g8285
WBGene00000509|C28D4.2|cka-1	protein_coding	lifted_all.ident	chrIV_pilon.g11392
WBGene00000510|C52B9.1|cka-2	protein_coding	lifted_all.ident	chrX_pilon.g18891
WBGene00000511|B0285.8|ckb-1	protein_coding	lifted_all.ident	chrIII_pilon.g7431
WBGene00000512|B0285.9|ckb-2	protein_coding	lifted_all.ident	chrIII_pilon.g7432
WBGene00000513|B0285.10|ckb-3	protein_coding	lifted_all.ident	chrIII_pilon.g7433
WBGene00000514|F22F7.5|ckb-4	protein_coding	lifted_all.ident	chrV_pilon.g13385
WBGene00000515|T27A10.3|ckc-1	protein_coding	lifted_all.ident	chrX_pilon.g18777
WBGene00000516|T05A6.1|cki-1	protein_coding	lifted_all.ident	chrII_pilon.g5102
WBGene00000517|T05A6.2|cki-2	protein_coding	lifted_all.ident	chrII_pilon.g5103
WBGene00000518|C05H8.1|ckk-1	protein_coding	lifted_all.ident	chrIII_pilon.g7755
WBGene00000519|Y47D3A.4|cku-70	protein_coding	lifted_all.ident	chrIII_pilon.g8998
WBGene00000520|R07E5.8|cku-80	protein_coding	lifted_all.ident	chrIII_pilon.g7451
WBGene00000521|C15C8.2|cky-1	protein_coding	lifted_all.ident	chrV_pilon.g16085
WBGene00000522|C09F12.1|clc-1	protein_coding	lifted_all.ident	chrX_pilon.g19996
WBGene00000523|C01C10.1|clc-2	protein_coding	lifted_all.ident	chrX_pilon.g19408
WBGene00000524|ZK563.4|clc-3	protein_coding	lifted_all.ident	chrX_pilon.g18746
WBGene00000525|T05A10.2|clc-4	protein_coding	lifted_all.ident	chrX_pilon.g19947
WBGene00000526|C01C10.4|clc-5	protein_coding	lifted_all.ident	chrX_pilon.g19409
WBGene00000527|C36B1.1|cle-1	protein_coding	lifted_all.ident	chrI_pilon.g1656
WBGene00000528|T27D12.2|clh-1	protein_coding	lifted_all.ident	chrII_pilon.g6049
WBGene00000529|B0491.8|clh-2	protein_coding	lifted_all.ident	chrII_pilon.g5928
WBGene00000530|E04F6.11|clh-3	protein_coding	lifted_all.ident	chrII_pilon.g4973
WBGene00000531|T06F4.2|clh-4	protein_coding	lifted_all.ident	chrX_pilon.g18855
WBGene00000532|C07H4.2|clh-5	protein_coding	lifted_all.ident	chrII_pilon.g5406
WBGene00000533|R07B7.1|clh-6	protein_coding	lifted_all.ident	chrV_pilon.g15911
WBGene00000534|R01B10.1|cpi-2	protein_coding	lifted_all.ident	chrV_pilon.g14365
WBGene00000535|K08B4.6|cpi-1	protein_coding	lifted_all.ident	chrIV_pilon.g10550
WBGene00000536|ZC395.2|clk-1	protein_coding	lifted_all.ident	chrIII_pilon.g7685
WBGene00000537|C07H6.6|clk-2	protein_coding	lifted_all.ident	chrIII_pilon.g8175
WBGene00000539|F07B10.1|cln-3.1	protein_coding	lifted_all.ident	chrV_pilon.g15728
WBGene00000540|C01G8.2|cln-3.2	protein_coding	lifted_all.ident	chrI_pilon.g878
WBGene00000541|ZC190.1|cln-3.3	protein_coding	lifted_all.ident	chrV_pilon.g15049
WBGene00000542|C06G4.2|clp-1	protein_coding	lifted_all.ident	chrIII_pilon.g8280
WBGene00000543|T04A8.16|clp-2	protein_coding	lifted_all.ident	chrIII_pilon.g7517
WBGene00000544|Y47H10A.1|clp-3	protein_coding	lifted_all.ident	chrI_pilon.g2395
WBGene00000545|Y39A3CL.5|clp-4	protein_coding	lifted_all.ident	chrIII_pilon.g7011
WBGene00000546|Y77E11A.10|clp-6	protein_coding	lifted_all.ident	chrIV_pilon.g9676
WBGene00000547|Y77E11A.11|clp-7	protein_coding	lifted_all.ident	chrIV_pilon.g9677
WBGene00000548|F56D1.4|clr-1	protein_coding	lifted_all.ident	chrII_pilon.g4506
WBGene00000549|R107.6|cls-2	protein_coding	lifted_all.ident	chrIII_pilon.g8535
WBGene00000550|F55H2.6|clu-1	protein_coding	lifted_all.ident	chrIII_pilon.g8635
WBGene00000551|C50F7.2|clx-1	protein_coding	lifted_no.ident
WBGene00000552|T21H3.3|cmd-1	protein_coding	lifted_all.ident	chrV_pilon.g13183
WBGene00000553|K07A9.2|cmk-1	protein_coding	lifted_all.ident	chrIV_pilon.g9738
WBGene00000554|F55C10.1|cnb-1	protein_coding	lifted_all.ident	chrV_pilon.g15754
WBGene00000555|R09B5.2|cnc-1	protein_coding	lifted_all.ident
WBGene00000556|R09B5.3|cnc-2	protein_coding	lifted_all.ident	chrV_pilon.g13223
WBGene00000557|R09B5.8|cnc-3	protein_coding	lifted_all.ident	chrV_pilon.g13222
WBGene00000558|R09B5.9|cnc-4	protein_coding	lifted_all.ident	chrV_pilon.g13221
WBGene00000559|R09B5.10|cnc-5	protein_coding	lifted_all.ident	chrV_pilon.g13220
WBGene00000560|Y46E12A.1|cnc-6	protein_coding	lifted_all.ident	chrIII_pilon.g7007
WBGene00000561|C34E10.7|cnd-1	protein_coding	lifted_all.ident	chrIII_pilon.g7673
WBGene00000562|F14H8.6|cng-1	protein_coding	lifted_all.ident	chrV_pilon.g16672
WBGene00000563|F38E11.12|cng-3	protein_coding	lifted_all.ident	chrIV_pilon.g11325
WBGene00000564|R01H10.8|cnk-1	protein_coding	lifted_all.ident	chrIII_pilon.g8834
WBGene00000565|Y17G7B.15|cnt-1	protein_coding	lifted_all.ident	chrII_pilon.g6092; chrII_pilon.g6093
WBGene00000566|Y39A1A.15|cnt-2	protein_coding	lifted_all.ident	chrIII_pilon.g8915; chrIII_pilon.g8917
WBGene00000567|ZK632.6|cnx-1	protein_coding	lifted_all.ident	chrIII_pilon.g8715
WBGene00000583|C48E7.5|cof-2	protein_coding	lifted_all.ident	chrI_pilon.g1110
WBGene00000584|R03C1.3|cog-1	protein_coding	lifted_all.ident	chrII_pilon.g6628
WBGene00000585|C06G3.10|cogc-2	protein_coding	lifted_all.ident	chrIV_pilon.g10738
WBGene00000591|K08A8.3|coh-1	protein_coding	lifted_all.ident	chrX_pilon.g19413
WBGene00000592|F08H9.1|coh-3	protein_coding	lifted_all.ident	chrV_pilon.g16531
WBGene00000593|W01B6.7|col-2	protein_coding	lifted_all.ident	chrIV_pilon.g11498
WBGene00000594|T28C6.6|col-3	protein_coding	lifted_all.ident	chrIV_pilon.g11174
WBGene00000596|C15A11.5|col-7	protein_coding	lifted_all.ident	chrI_pilon.g1383
WBGene00000597|F11H8.3|col-8	protein_coding	lifted_all.ident	chrIII_pilon.g8053
WBGene00000598|F54B11.1|col-9	protein_coding	lifted_all.ident	chrX_pilon.g20443
WBGene00000599|B0222.8|col-10	protein_coding	lifted_all.ident	chrV_pilon.g15188
WBGene00000601|F15H10.1|col-12	protein_coding	lifted_all.ident	chrV_pilon.g15517
WBGene00000602|F15H10.2|col-13	protein_coding	lifted_all.ident	chrV_pilon.g15516
WBGene00000603|C46A5.3|col-14	protein_coding	lifted_all.ident	chrIV_pilon.g10906
WBGene00000606|F11G11.10|col-17	protein_coding	lifted_all.ident
WBGene00000608|ZK1193.1|col-19	protein_coding	lifted_all.ident	chrX_pilon.g18272
WBGene00000609|F11G11.11|col-20	protein_coding	lifted_all.ident	chrII_pilon.g4351
WBGene00000610|F36A4.6|col-33	protein_coding	lifted_all.ident	chrIV_pilon.g10158
WBGene00000611|F36A4.10|col-34	protein_coding	lifted_all.ident	chrIV_pilon.g10154
WBGene00000612|C15A11.1|col-35	protein_coding	lifted_all.ident	chrI_pilon.g1379
WBGene00000613|C27H5.5|col-36	protein_coding	lifted_all.ident	chrII_pilon.g4954
WBGene00000614|ZK863.2|col-37	protein_coding	lifted_no.ident	chrV_pilon.g15940
WBGene00000615|F54C9.4|col-38	protein_coding	lifted_all.ident	chrII_pilon.g5285
WBGene00000616|C09G5.4|col-39	protein_coding	lifted_all.ident	chrII_pilon.g5796
WBGene00000617|T13B5.4|col-40	protein_coding	lifted_all.ident	chrII_pilon.g3297
WBGene00000618|T10B10.1|col-41	protein_coding	lifted_all.ident	chrX_pilon.g20714
WBGene00000620|ZC513.8|col-43	protein_coding	lifted_all.ident	chrV_pilon.g14889
WBGene00000621|F54B11.2|col-44	protein_coding	lifted_all.ident	chrX_pilon.g20444
WBGene00000622|F53G12.7|col-45	protein_coding	lifted_all.ident	chrI_pilon.g20
WBGene00000623|Y18H1A.13|col-46	protein_coding	lifted_all.ident	chrI_pilon.g117
WBGene00000624|Y18H1A.12|col-47	protein_coding	lifted_all.ident	chrI_pilon.g118
WBGene00000625|Y54E10BL.2|col-48	protein_coding	lifted_all.ident	chrI_pilon.g443
WBGene00000626|K09H9.3|col-49	protein_coding	lifted_all.ident	chrI_pilon.g461
WBGene00000627|T28F2.6|col-50	protein_coding	lifted_all.ident	chrI_pilon.g547
WBGene00000628|T28F2.8|col-51	protein_coding	lifted_all.ident
WBGene00000629|D1007.2|col-52	protein_coding	lifted_all.ident	chrI_pilon.g726
WBGene00000630|M01A12.1|col-53	protein_coding	lifted_all.ident	chrI_pilon.g965
WBGene00000631|F33D11.3|col-54	protein_coding	lifted_all.ident	chrI_pilon.g1008
WBGene00000632|T05E7.2|col-55	protein_coding	lifted_all.ident	chrI_pilon.g1095
WBGene00000633|T08B2.2|col-56	protein_coding	lifted_all.ident	chrI_pilon.g1106
WBGene00000634|F26B1.4|col-58	protein_coding	lifted_all.ident	chrI_pilon.g1126
WBGene00000636|F22D6.10|col-60	protein_coding	lifted_all.ident	chrI_pilon.g1311
WBGene00000637|C01H6.1|col-61	protein_coding	lifted_all.ident	chrI_pilon.g1332
WBGene00000638|C15A11.6|col-62	protein_coding	lifted_all.ident	chrI_pilon.g1384
WBGene00000639|ZK265.2|col-63	protein_coding	lifted_all.ident	chrI_pilon.g1544
WBGene00000640|F52F12.2|col-64	protein_coding	lifted_all.ident	chrI_pilon.g1925
WBGene00000641|K08C9.4|col-65	protein_coding	lifted_all.ident	chrI_pilon.g2282
WBGene00000644|C50D2.4|col-68	protein_coding	lifted_all.ident	chrII_pilon.g3045
WBGene00000645|K01A2.7|col-69	protein_coding	lifted_all.ident	chrII_pilon.g3085
WBGene00000646|H17B01.2	protein_coding	lifted_all.ident	chrII_pilon.g3358
WBGene00000647|Y49F6B.10|col-71	protein_coding	lifted_all.ident	chrII_pilon.g4009
WBGene00000648|W09G10.1|col-72	protein_coding	lifted_all.ident	chrII_pilon.g4017
WBGene00000649|F11G11.12|col-73	protein_coding	lifted_all.ident	chrII_pilon.g4352
WBGene00000650|ZK1248.2|col-74	protein_coding	lifted_all.ident	chrII_pilon.g4624
WBGene00000651|K03H9.2|col-75	protein_coding	lifted_all.ident	chrII_pilon.g4763
WBGene00000652|M110.1|col-76	protein_coding	lifted_all.ident	chrII_pilon.g5187
WBGene00000653|M195.1|col-77	protein_coding	lifted_all.ident	chrII_pilon.g5224
WBGene00000654|W07A12.5|col-78	protein_coding	lifted_all.ident	chrII_pilon.g5421
WBGene00000655|C09G5.3|col-79	protein_coding	lifted_all.ident	chrII_pilon.g5795
WBGene00000656|C09G5.5|col-80	protein_coding	lifted_all.ident	chrII_pilon.g5797
WBGene00000657|F38A3.1|col-81	protein_coding	lifted_all.ident	chrII_pilon.g5856
WBGene00000658|F33A8.9|col-83	protein_coding	lifted_all.ident	chrII_pilon.g5864
WBGene00000659|K12D12.3|col-84	protein_coding	lifted_all.ident	chrII_pilon.g6054
WBGene00000660|T21B4.2|col-85	protein_coding	lifted_all.ident	chrII_pilon.g6187
WBGene00000661|Y81G3A.5|col-86	protein_coding	lifted_all.ident	chrII_pilon.g6317
WBGene00000662|Y39G8C.4|col-87	protein_coding	lifted_all.ident	chrII_pilon.g6479
WBGene00000663|W05G11.3|col-88	protein_coding	lifted_all.ident
WBGene00000664|F17C8.2|col-89	protein_coding	lifted_all.ident	chrIII_pilon.g7530
WBGene00000665|C29E4.1|col-90	protein_coding	lifted_all.ident	chrIII_pilon.g8264
WBGene00000666|F09G8.6|col-91	protein_coding	lifted_all.ident	chrIII_pilon.g8348
WBGene00000667|W05B2.6|col-92	protein_coding	lifted_all.ident	chrIII_pilon.g8972
WBGene00000668|W05B2.5|col-93	protein_coding	lifted_all.ident	chrIII_pilon.g8973
WBGene00000669|W05B2.1|col-94	protein_coding	lifted_all.ident	chrIII_pilon.g8974
WBGene00000670|Y41C4A.16|col-95	protein_coding	lifted_all.ident	chrIII_pilon.g9075
WBGene00000671|Y41C4A.19|col-96	protein_coding	lifted_all.ident	chrIII_pilon.g9076
WBGene00000672|ZK1010.7|col-97	protein_coding	lifted_all.ident	chrIII_pilon.g9275
WBGene00000673|F14F7.1|col-98	protein_coding	lifted_all.ident	chrIII_pilon.g9279
WBGene00000674|F29C4.8|col-99	protein_coding	lifted_all.ident	chrIV_pilon.g9449
WBGene00000675|K02D7.3|col-101	protein_coding	lifted_all.ident	chrIV_pilon.g9487
WBGene00000676|C18H7.3|col-102	protein_coding	lifted_all.ident	chrIV_pilon.g9536
WBGene00000677|F56B3.1|col-103	protein_coding	lifted_all.ident	chrIV_pilon.g9563
WBGene00000678|F58F6.1|col-104	protein_coding	lifted_all.ident	chrIV_pilon.g9666
WBGene00000679|F58F6.2|col-105	protein_coding	lifted_all.ident	chrIV_pilon.g9667
WBGene00000680|Y77E11A.15|col-106	protein_coding	lifted_all.ident	chrIV_pilon.g9681
WBGene00000681|C34H4.4|col-107	protein_coding	lifted_all.ident	chrIV_pilon.g9692
WBGene00000682|Y41D4A.2|col-108	protein_coding	lifted_all.ident	chrIV_pilon.g9731
WBGene00000683|Y38C1BA.3|col-109	protein_coding	lifted_all.ident	chrIV_pilon.g9737
WBGene00000684|F19C7.7|col-110	protein_coding	lifted_all.ident	chrIV_pilon.g10232
WBGene00000685|F29B9.9|col-111	protein_coding	lifted_all.ident	chrIV_pilon.g10243
WBGene00000687|C34D4.15|col-113	protein_coding	lifted_all.ident	chrIV_pilon.g10769
WBGene00000688|D2024.8|col-114	protein_coding	lifted_all.ident	chrIV_pilon.g10799
WBGene00000689|Y42H9B.1|col-115	protein_coding	lifted_all.ident	chrIV_pilon.g10972
WBGene00000690|F17E9.1|col-116	protein_coding	lifted_all.ident	chrIV_pilon.g11057
WBGene00000691|T28C6.4|col-117	protein_coding	lifted_all.ident	chrIV_pilon.g11173
WBGene00000692|T11B7.3|col-118	protein_coding	lifted_all.ident	chrIV_pilon.g11178
WBGene00000693|C53B4.5|col-119	protein_coding	lifted_all.ident	chrIV_pilon.g11207
WBGene00000694|Y11D7A.11|col-120	protein_coding	lifted_all.ident	chrIV_pilon.g11266
WBGene00000695|F56D5.1|col-121	protein_coding	lifted_all.ident	chrIV_pilon.g11302
WBGene00000696|T05A1.2|col-122	protein_coding	lifted_all.ident	chrIV_pilon.g11351
WBGene00000697|W08D2.6|col-123	protein_coding	lifted_all.ident	chrIV_pilon.g11418
WBGene00000698|C24F3.6|col-124	protein_coding	lifted_all.ident	chrIV_pilon.g11538
WBGene00000699|C29F4.1|col-125	protein_coding	lifted_no.ident	chrIV_pilon.g11802
WBGene00000700|F54D1.2|col-126	protein_coding	lifted_all.ident	chrIV_pilon.g11811
WBGene00000701|F54D1.3|col-127	protein_coding	lifted_all.ident	chrIV_pilon.g11812
WBGene00000702|F12F6.9|col-128	protein_coding	lifted_all.ident	chrIV_pilon.g11875
WBGene00000703|M18.1|col-129	protein_coding	lifted_all.ident	chrIV_pilon.g12002
WBGene00000704|F08G5.4|col-130	protein_coding	lifted_all.ident	chrIV_pilon.g12072
WBGene00000705|C39E9.3|col-131	protein_coding	lifted_all.ident	chrIV_pilon.g12208
WBGene00000706|C39E9.9|col-132	protein_coding	lifted_all.ident	chrIV_pilon.g12215
WBGene00000707|F52B11.4|col-133	protein_coding	lifted_all.ident	chrIV_pilon.g12422
WBGene00000708|M199.5|col-135	protein_coding	lifted_no.ident	chrIV_pilon.g12591
WBGene00000710|Y51H4A.9|col-137	protein_coding	lifted_all.ident	chrIV_pilon.g12754
WBGene00000711|C52D10.13|col-138	protein_coding	lifted_all.ident	chrIV_pilon.g12845
WBGene00000712|F41F3.4|col-139	protein_coding	lifted_all.ident	chrV_pilon.g14042
WBGene00000713|F26F12.1|col-140	protein_coding	lifted_all.ident	chrV_pilon.g14323
WBGene00000714|T15B7.5|col-141	protein_coding	lifted_all.ident	chrV_pilon.g14528
WBGene00000715|T15B7.4|col-142	protein_coding	lifted_all.ident	chrV_pilon.g14529
WBGene00000716|T15B7.3|col-143	protein_coding	lifted_all.ident	chrV_pilon.g14531
WBGene00000717|B0222.6|col-144	protein_coding	lifted_all.ident	chrV_pilon.g15186
WBGene00000718|B0222.7|col-145	protein_coding	lifted_all.ident	chrV_pilon.g15187
WBGene00000719|T06E4.6|col-146	protein_coding	lifted_all.ident	chrV_pilon.g15296
WBGene00000720|T06E4.4|col-147	protein_coding	lifted_all.ident	chrV_pilon.g15298
WBGene00000721|C12D8.8|col-148	protein_coding	lifted_all.ident	chrV_pilon.g15466
WBGene00000722|B0024.1|col-149	protein_coding	lifted_all.ident	chrV_pilon.g15479
WBGene00000723|B0024.2|col-150	protein_coding	lifted_all.ident	chrV_pilon.g15480
WBGene00000724|AC3.6|col-151	protein_coding	lifted_all.ident	chrV_pilon.g15507
WBGene00000725|F32G8.5|col-152	protein_coding	lifted_all.ident	chrV_pilon.g15553
WBGene00000726|F17C11.3|col-153	protein_coding	lifted_all.ident	chrV_pilon.g15648
WBGene00000727|F55C10.2|col-154	protein_coding	lifted_all.ident	chrV_pilon.g15756
WBGene00000728|F55C10.3|col-155	protein_coding	lifted_all.ident	chrV_pilon.g15758
WBGene00000729|F57B7.3|col-156	protein_coding	lifted_all.ident	chrV_pilon.g15776
WBGene00000730|T11F9.9|col-157	protein_coding	lifted_all.ident	chrV_pilon.g15786
WBGene00000731|D2023.7|col-158	protein_coding	lifted_all.ident	chrV_pilon.g15865
WBGene00000732|F57B1.3|col-159	protein_coding	lifted_all.ident	chrV_pilon.g16193
WBGene00000733|F57B1.4|col-160	protein_coding	lifted_all.ident	chrV_pilon.g16194
WBGene00000734|C50B6.4|col-161	protein_coding	lifted_all.ident	chrV_pilon.g16210
WBGene00000735|Y2H9A.3|col-162	protein_coding	lifted_all.ident	chrV_pilon.g16244
WBGene00000736|F46B3.17|col-163	protein_coding	lifted_all.ident	chrV_pilon.g18126
WBGene00000737|T21D9.1|col-164	protein_coding	lifted_all.ident	chrX_pilon.g18564
WBGene00000738|F14H12.1|col-165	protein_coding	lifted_all.ident	chrX_pilon.g18902
WBGene00000739|T07H6.3|col-166	protein_coding	lifted_all.ident
WBGene00000740|T10E10.2|col-167	protein_coding	lifted_all.ident
WBGene00000741|T10E10.1|col-168	protein_coding	lifted_all.ident
WBGene00000742|T10E10.5|col-169	protein_coding	lifted_all.ident
WBGene00000743|T10E10.6|col-170	protein_coding	lifted_all.ident
WBGene00000744|T10E10.7|col-171	protein_coding	lifted_all.ident
WBGene00000745|F38B6.5|col-172	protein_coding	lifted_all.ident	chrX_pilon.g19280
WBGene00000746|F41C6.5|col-173	protein_coding	lifted_all.ident	chrX_pilon.g19318
WBGene00000747|F46C8.2|col-174	protein_coding	lifted_all.ident	chrX_pilon.g19427
WBGene00000748|C35B8.1|col-175	protein_coding	lifted_all.ident	chrX_pilon.g19713
WBGene00000749|ZC373.7|col-176	protein_coding	lifted_all.ident	chrX_pilon.g19844
WBGene00000750|F59F3.2|col-177	protein_coding	lifted_all.ident	chrX_pilon.g19988
WBGene00000751|C34F6.2|col-178	protein_coding	lifted_all.ident	chrX_pilon.g20022
WBGene00000752|C34F6.3|col-179	protein_coding	lifted_all.ident	chrX_pilon.g20023
WBGene00000753|C44C10.1|col-180	protein_coding	lifted_all.ident	chrX_pilon.g20119
WBGene00000754|W03G11.1|col-181	protein_coding	lifted_all.ident	chrX_pilon.g20189
WBGene00000755|R09A8.4|col-182	protein_coding	lifted_all.ident	chrX_pilon.g20292
WBGene00000756|F02D10.1|col-183	protein_coding	lifted_all.ident	chrX_pilon.g20418
WBGene00000757|F15A2.1|col-184	protein_coding	lifted_all.ident	chrX_pilon.g20419
WBGene00000758|H06A10.2|col-185	protein_coding	lifted_all.ident	chrX_pilon.g20426
WBGene00000759|E03G2.4|col-186	protein_coding	lifted_all.ident	chrX_pilon.g20824
WBGene00000760|C30F2.1|col-187	protein_coding	lifted_all.ident	chrX_pilon.g20840
WBGene00000761|C24A11.9|coq-1	protein_coding	lifted_all.ident	chrI_pilon.g907
WBGene00000762|F57B9.4|coq-2	protein_coding	lifted_all.ident	chrIII_pilon.g8035
WBGene00000763|Y57G11C.11|coq-3	protein_coding	lifted_all.ident	chrIV_pilon.g12536
WBGene00000764|T03F1.2|coq-4	protein_coding	lifted_all.ident	chrI_pilon.g595
WBGene00000765|ZK652.9|coq-5	protein_coding	lifted_all.ident	chrIII_pilon.g8235
WBGene00000766|K07B1.2|coq-6	protein_coding	lifted_all.ident	chrV_pilon.g15226
WBGene00000767|C35D10.4|coq-8	protein_coding	lifted_all.ident	chrIII_pilon.g7568
WBGene00000768|R01H10.3|cor-1	protein_coding	lifted_all.ident	chrIII_pilon.g8829
WBGene00000770|C40H1.1|cpb-1	protein_coding	lifted_all.ident	chrIII_pilon.g8587
WBGene00000771|C30B5.3|cpb-2	protein_coding	lifted_all.ident	chrII_pilon.g4703
WBGene00000772|B0414.5|cpb-3	protein_coding	lifted_all.ident	chrI_pilon.g994
WBGene00000773|F28C6.3|cpf-1	protein_coding	lifted_all.ident	chrII_pilon.g5297
WBGene00000774|F56A8.6|cpf-2	protein_coding	lifted_all.ident	chrIII_pilon.g9310
WBGene00000775|F38E11.3|cpin-1	protein_coding	lifted_all.ident	chrIV_pilon.g11320
WBGene00000776|T03E6.7|cpl-1	protein_coding	lifted_all.ident	chrV_pilon.g17198
WBGene00000777|F43G9.9|cpn-1	protein_coding	lifted_all.ident	chrI_pilon.g1634
WBGene00000778|D1069.2|cpn-2	protein_coding	lifted_all.ident	chrII_pilon.g3093
WBGene00000779|F28H1.2|cpn-3	protein_coding	lifted_all.ident	chrI_pilon.g626
WBGene00000780|F49D11.8|cpn-4	protein_coding	lifted_all.ident	chrI_pilon.g2172
WBGene00000781|C52E4.1|cpr-1	protein_coding	lifted_all.ident	chrV_pilon.g15892
WBGene00000782|F36D3.9|cpr-2	protein_coding	lifted_all.ident	chrV_pilon.g17183
WBGene00000783|T10H4.12|cpr-3	protein_coding	lifted_all.ident	chrV_pilon.g16773
WBGene00000784|F44C4.3|cpr-4	protein_coding	lifted_all.ident	chrV_pilon.g14478
WBGene00000785|W07B8.5|cpr-5	protein_coding	lifted_all.ident	chrV_pilon.g13180
WBGene00000786|C25B8.3|cpr-6	protein_coding	lifted_all.ident	chrX_pilon.g19270
WBGene00000787|C41D11.8|cps-6	protein_coding	lifted_all.ident	chrI_pilon.g702
WBGene00000788|F32B5.8|cpz-1	protein_coding	lifted_all.ident	chrI_pilon.g375
WBGene00000789|M04G12.2|cpz-2	protein_coding	lifted_all.ident	chrV_pilon.g16230
WBGene00000792|F11C7.4|crb-1	protein_coding	lifted_all.ident	chrX_pilon.g21030
WBGene00000793|Y41C4A.4|crh-1	protein_coding	lifted_all.ident	chrIII_pilon.g9070
WBGene00000794|Y47G6A.8|crn-1	protein_coding	lifted_all.ident	chrI_pilon.g518
WBGene00000795|CD4.2|crn-2	protein_coding	lifted_all.ident	chrV_pilon.g14272
WBGene00000796|C14A4.4|crn-3	protein_coding	lifted_all.ident	chrII_pilon.g5769
WBGene00000797|AH9.2|crn-4	protein_coding	lifted_all.ident	chrX_pilon.g18590
WBGene00000798|C14A4.5|crn-5	protein_coding	lifted_all.ident	chrII_pilon.g5770
WBGene00000799|K04H4.6|crn-6	protein_coding	lifted_all.ident	chrIII_pilon.g8598
WBGene00000800|Y23H5A.7|cars-1	protein_coding	lifted_all.ident	chrI_pilon.g367
WBGene00000802|Y38A10A.5|crt-1	protein_coding	lifted_all.ident	chrV_pilon.g14377
WBGene00000803|F53H4.1|csb-1	protein_coding	lifted_all.ident	chrX_pilon.g20813
WBGene00000804|Y48E1B.12|csc-1	protein_coding	lifted_all.ident	chrII_pilon.g6387
WBGene00000812|Y48G1C.2|csk-1	protein_coding	lifted_all.ident	chrI_pilon.g9
WBGene00000813|Y59A8A.1|csn-1	protein_coding	lifted_all.ident	chrV_pilon.g17569
WBGene00000814|B0025.2|csn-2	protein_coding	lifted_all.ident	chrI_pilon.g1048
WBGene00000815|Y38C1AA.2|csn-3	protein_coding	lifted_all.ident	chrIV_pilon.g9457
WBGene00000816|Y55F3AM.15|csn-4	protein_coding	lifted_all.ident	chrIV_pilon.g9618
WBGene00000817|B0547.1|csn-5	protein_coding	lifted_all.ident	chrIV_pilon.g10481
WBGene00000818|Y67H2A.6|csn-6	protein_coding	lifted_all.ident	chrIV_pilon.g12268
WBGene00000819|Y48E1B.13|csp-1	protein_coding	lifted_all.ident	chrII_pilon.g6388
WBGene00000820|Y73B6BL.7|csp-2	protein_coding	lifted_all.ident	chrIV_pilon.g10594; chrIV_pilon.g10595
WBGene00000821|Y47H9C.6|csp-3	protein_coding	lifted_all.ident	chrI_pilon.g2354
WBGene00000822|F40E10.3|csq-1	protein_coding	lifted_all.ident	chrX_pilon.g20628
WBGene00000829|MTCE.21|ctb-1	protein_coding	lifted_bad.trans
WBGene00000830|Y54G11A.6|ctl-1	protein_coding	lifted_all.ident	chrII_pilon.g6514
WBGene00000831|Y54G11A.5|ctl-2	protein_coding	lifted_all.ident	chrII_pilon.g6513
WBGene00000832|Y23H5A.5|ctn-1	protein_coding	lifted_all.ident	chrI_pilon.g363
WBGene00000833|T20G5.2|cts-1	protein_coding	lifted_all.ident	chrIII_pilon.g8821
WBGene00000834|Y76A2A.2|cua-1	protein_coding	lifted_all.ident	chrIII_pilon.g9358
WBGene00000835|ZK652.11|cuc-1	protein_coding	lifted_all.ident	chrIII_pilon.g8237
WBGene00000836|D2045.6|cul-1	protein_coding	lifted_all.ident	chrIII_pilon.g8875
WBGene00000837|ZK520.4|cul-2	protein_coding	lifted_all.ident	chrIII_pilon.g9405
WBGene00000838|Y108G3AL.1|cul-3	protein_coding	lifted_all.ident	chrV_pilon.g12950
WBGene00000839|F45E12.3|cul-4	protein_coding	lifted_all.ident	chrII_pilon.g4988
WBGene00000840|ZK856.1|cul-5	protein_coding	lifted_all.ident	chrV_pilon.g15438
WBGene00000841|K08E7.7|cul-6	protein_coding	lifted_all.ident	chrIV_pilon.g12116
WBGene00000843|F25D7.1|cup-2	protein_coding	lifted_all.ident	chrI_pilon.g2032
WBGene00000845|C02C2.3|cup-4	protein_coding	lifted_all.ident	chrIII_pilon.g8240
WBGene00000846|R13A5.1|cup-5	protein_coding	lifted_all.ident	chrIII_pilon.g8189
WBGene00000851|C47G2.1|cut-1	protein_coding	lifted_all.ident	chrII_pilon.g5908
WBGene00000853|M142.2|cut-6	protein_coding	lifted_all.ident	chrIII_pilon.g8960
WBGene00000854|C07H6.8|cux-7	protein_coding	lifted_all.ident	chrIII_pilon.g8176
WBGene00000857|K10B4.6|cwn-1	protein_coding	lifted_all.ident	chrII_pilon.g3053
WBGene00000858|W01B6.1|cwn-2	protein_coding	lifted_all.ident	chrIV_pilon.g11492
WBGene00000859|C37H5.10|cwp-1	protein_coding	lifted_all.ident	chrV_pilon.g14089
WBGene00000860|C37H5.11|cwp-2	protein_coding	lifted_all.ident	chrV_pilon.g14090
WBGene00000861|C37H5.4|cwp-3	protein_coding	lifted_all.ident	chrV_pilon.g14091
WBGene00000862|K11D12.1|cwp-4	protein_coding	lifted_all.ident	chrV_pilon.g14152
WBGene00000863|ZK507.6|cya-1	protein_coding	lifted_all.ident	chrIII_pilon.g8547
WBGene00000864|F59H6.7|cya-2	protein_coding	lifted_all.ident	chrII_pilon.g3555
WBGene00000865|ZC168.4|cyb-1	protein_coding	lifted_all.ident	chrIV_pilon.g11663
WBGene00000866|Y43E12A.1|cyb-2.1	protein_coding	lifted_all.ident	chrIV_pilon.g11734
WBGene00000867|H31G24.4|cyb-2.2	protein_coding	lifted_all.ident	chrI_pilon.g634
WBGene00000868|T06E6.2|cyb-3	protein_coding	lifted_all.ident	chrV_pilon.g16807
WBGene00000869|C54G4.8|cyc-1	protein_coding	lifted_all.ident	chrI_pilon.g1504
WBGene00000870|Y38F1A.5|cyd-1	protein_coding	lifted_all.ident	chrII_pilon.g6296
WBGene00000871|C37A2.4|cye-1	protein_coding	lifted_all.ident	chrI_pilon.g1240
WBGene00000872|F11H8.4|cyk-1	protein_coding	lifted_all.ident	chrIII_pilon.g8055
WBGene00000874|ZK328.1|cyk-3	protein_coding	lifted_all.ident	chrIII_pilon.g7845
WBGene00000875|K08E3.6|cyk-4	protein_coding	lifted_all.ident	chrIII_pilon.g9418
WBGene00000876|C52E4.6|cyl-1	protein_coding	lifted_all.ident	chrV_pilon.g15897
WBGene00000877|Y49A3A.5|cyn-1	protein_coding	lifted_all.ident	chrV_pilon.g16508
WBGene00000878|ZK520.5|cyn-2	protein_coding	lifted_all.ident	chrIII_pilon.g9406
WBGene00000879|Y75B12B.5|cyn-3	protein_coding	lifted_all.ident	chrV_pilon.g16730
WBGene00000880|F59E10.2|cyn-4	protein_coding	lifted_all.ident	chrII_pilon.g5826
WBGene00000881|F31C3.1|cyn-5	protein_coding	lifted_all.ident	chrI_pilon.g3008
WBGene00000882|F42G9.2|cyn-6	protein_coding	lifted_all.ident	chrIII_pilon.g6813
WBGene00000883|Y75B12B.2|cyn-7	protein_coding	lifted_all.ident	chrV_pilon.g16728
WBGene00000884|D1009.2|cyn-8	protein_coding	lifted_all.ident	chrX_pilon.g19664
WBGene00000885|T27D1.1|cyn-9	protein_coding	lifted_all.ident	chrIII_pilon.g7294
WBGene00000886|B0252.4|cyn-10	protein_coding	lifted_all.ident	chrII_pilon.g4893
WBGene00000887|T01B7.4|cyn-11	protein_coding	lifted_all.ident	chrII_pilon.g5327
WBGene00000888|C34D4.12|cyn-12	protein_coding	lifted_all.ident	chrIV_pilon.g10764
WBGene00000889|Y116A8C.34|cyn-13	protein_coding	lifted_all.ident	chrIV_pilon.g12828; chrIV_pilon.g12830
WBGene00000890|F39H2.2|sig-7	protein_coding	lifted_all.ident	chrI_pilon.g1638
WBGene00000891|Y87G2A.6|cyn-15	protein_coding	lifted_all.ident	chrI_pilon.g2752
WBGene00000892|Y17G7B.9|cyn-16	protein_coding	lifted_all.ident	chrII_pilon.g6085
WBGene00000893|ZC250.1|cyn-17	protein_coding	lifted_all.ident	chrV_pilon.g14318
WBGene00000894|M110.5|dab-1	protein_coding	lifted_all.ident	chrII_pilon.g5193
WBGene00000895|B0412.1|dac-1	protein_coding	lifted_all.ident	chrIII_pilon.g6820
WBGene00000896|F57B10.10|dad-1	protein_coding	lifted_all.ident	chrI_pilon.g1189
WBGene00000897|F29C4.1|daf-1	protein_coding	lifted_all.ident	chrIV_pilon.g9448
WBGene00000898|Y55D5A.5|daf-2	protein_coding	lifted_all.ident	chrIII_pilon.g7194
WBGene00000899|F25E2.5|daf-3	protein_coding	lifted_all.ident	chrX_pilon.g18333
WBGene00000900|C05D2.1|daf-4	protein_coding	lifted_all.ident	chrIII_pilon.g7754
WBGene00000901|W01G7.1|daf-5	protein_coding	lifted_all.ident	chrII_pilon.g6474
WBGene00000902|F31F6.5|daf-6	protein_coding	lifted_all.ident	chrX_pilon.g20666
WBGene00000903|B0412.2|daf-7	protein_coding	lifted_all.ident	chrIII_pilon.g6819
WBGene00000904|R05D11.1|daf-8	protein_coding	lifted_all.ident	chrI_pilon.g1617
WBGene00000905|T13C5.1|daf-9	protein_coding	lifted_all.ident	chrX_pilon.g19190
WBGene00000906|F23B2.4|daf-10	protein_coding	lifted_all.ident	chrIV_pilon.g11243
WBGene00000907|B0240.3|daf-11	protein_coding	lifted_all.ident	chrV_pilon.g15842
WBGene00000908|F11A1.3|daf-12	protein_coding	lifted_all.ident	chrX_pilon.g19930; chrX_pilon.g19933
WBGene00000910|F01G10.8|daf-14	protein_coding	lifted_all.ident	chrIV_pilon.g11551
WBGene00000911|C10C5.6|daf-15	protein_coding	lifted_all.ident	chrIV_pilon.g11301
WBGene00000912|R13H8.1|daf-16	protein_coding	lifted_all.ident	chrI_pilon.g2131; chrI_pilon.g2132
WBGene00000913|T07A9.6|daf-18	protein_coding	lifted_all.ident	chrIV_pilon.g9506
WBGene00000914|F33H1.1|daf-19	protein_coding	lifted_all.ident	chrII_pilon.g5675
WBGene00000915|C47E8.5|hsp-90	protein_coding	lifted_all.ident	chrV_pilon.g16589
WBGene00000917|Y48G1A.3|daf-25	protein_coding	lifted_all.ident	chrI_pilon.g56
WBGene00000920|Y116F11B.1|daf-28	protein_coding	lifted_all.ident	chrV_pilon.g17969
WBGene00000923|K07H8.3|daf-31	protein_coding	lifted_all.ident	chrIV_pilon.g11031
WBGene00000928|M03A1.7|dao-2	protein_coding	lifted_all.ident	chrII_pilon.g4269
WBGene00000929|K07E3.3|dao-3	protein_coding	lifted_all.ident	chrX_pilon.g19511
WBGene00000930|ZC373.6|dao-4	protein_coding	lifted_all.ident	chrX_pilon.g19843
WBGene00000931|C25A1.10|dao-5	protein_coding	lifted_all.ident	chrI_pilon.g1990
WBGene00000932|T05G5.12|dao-6	protein_coding	lifted_all.ident	chrIII_pilon.g8688
WBGene00000933|C14A4.2|dap-3	protein_coding	lifted_all.ident	chrII_pilon.g5767
WBGene00000934|T23G5.5|dat-1	protein_coding	lifted_all.ident	chrIII_pilon.g8575
WBGene00000935|F56D1.7|daz-1	protein_coding	lifted_all.ident	chrII_pilon.g4505
WBGene00000936|T25F10.2|dbl-1	protein_coding	lifted_all.ident	chrV_pilon.g14506
WBGene00000937|C55B7.8|dbr-1	protein_coding	lifted_all.ident	chrI_pilon.g1167
WBGene00000938|C26C6.5|dcp-66	protein_coding	lifted_all.ident	chrI_pilon.g1407
WBGene00000939|K12H4.8|dcr-1	protein_coding	lifted_all.ident	chrIII_pilon.g8300
WBGene00000940|Y113G7A.9|dcs-1	protein_coding	lifted_all.ident	chrV_pilon.g18022
WBGene00000941|Y39A3CR.4|ddp-1	protein_coding	lifted_all.ident	chrIII_pilon.g7016
WBGene00000942|ZC477.9|deb-1	protein_coding	lifted_all.ident	chrIV_pilon.g10752
WBGene00000950|C47C12.6|deg-1	protein_coding	lifted_all.ident	chrX_pilon.g19463
WBGene00000951|K03B8.9|deg-3	protein_coding	lifted_all.ident	chrV_pilon.g15768
WBGene00000952|E02H4.1|del-1	protein_coding	lifted_all.ident	chrX_pilon.g20553
WBGene00000953|F58G6.6|del-2	protein_coding	lifted_all.ident	chrIV_pilon.g11367
WBGene00000955|T26H10.1|des-2	protein_coding	lifted_all.ident	chrV_pilon.g15769
WBGene00000958|C09E10.2|dgk-1	protein_coding	lifted_all.ident	chrX_pilon.g18363
WBGene00000959|F46H6.2|dgk-2	protein_coding	lifted_all.ident	chrX_pilon.g18926
WBGene00000960|F54G8.2|dgk-3	protein_coding	lifted_all.ident	chrIII_pilon.g8561
WBGene00000961|T21B6.1|dgn-1	protein_coding	lifted_all.ident	chrX_pilon.g19973
WBGene00000962|T21E12.4|dhc-1	protein_coding	lifted_all.ident	chrI_pilon.g695
WBGene00000963|R06C7.3|dhp-1	protein_coding	lifted_all.ident	chrI_pilon.g1343
WBGene00000964|C47E12.8|dhp-2	protein_coding	lifted_all.ident	chrIV_pilon.g11463
WBGene00000965|C01G8.3|dhs-1	protein_coding	lifted_all.ident	chrI_pilon.g879
WBGene00000966|F55A12.4|dhs-2	protein_coding	lifted_all.ident	chrI_pilon.g897
WBGene00000967|T02E1.5|dhs-3	protein_coding	lifted_all.ident	chrI_pilon.g1536; chrI_pilon.g1538
WBGene00000968|T05F1.10|dhs-4	protein_coding	lifted_all.ident	chrI_pilon.g1870
WBGene00000969|F56D1.5|dhs-5	protein_coding	lifted_all.ident	chrII_pilon.g4504
WBGene00000970|C17G10.8|dhs-6	protein_coding	lifted_all.ident	chrII_pilon.g4558
WBGene00000971|E04F6.7|dhs-7	protein_coding	lifted_all.ident	chrII_pilon.g4967
WBGene00000972|K10H10.3|dhs-8	protein_coding	lifted_all.ident	chrII_pilon.g6544
WBGene00000973|Y32H12A.3|dhs-9	protein_coding	lifted_all.ident	chrIII_pilon.g7698
WBGene00000974|Y39A1A.11|dhs-11	protein_coding	lifted_all.ident	chrIII_pilon.g8911
WBGene00000975|K08F4.9|dhs-12	protein_coding	lifted_all.ident	chrIV_pilon.g11521
WBGene00000976|F36H9.3|dhs-13	protein_coding	lifted_all.ident	chrV_pilon.g13301
WBGene00000977|R05D8.8|dhs-14	protein_coding	lifted_all.ident	chrV_pilon.g13547
WBGene00000978|R05D8.10|dhs-15	protein_coding	lifted_all.ident	chrV_pilon.g13549
WBGene00000979|C10F3.2|dhs-16	protein_coding	lifted_all.ident	chrV_pilon.g14354
WBGene00000980|F29G9.6|dhs-17	protein_coding	lifted_all.ident	chrV_pilon.g14362
WBGene00000981|C45B11.3|dhs-18	protein_coding	lifted_all.ident	chrV_pilon.g15670
WBGene00000982|T11F9.11|dhs-19	protein_coding	lifted_all.ident	chrV_pilon.g15789
WBGene00000983|F35B12.2|dhs-20	protein_coding	lifted_all.ident	chrV_pilon.g15822
WBGene00000984|R11D1.11|dhs-21	protein_coding	lifted_all.ident	chrV_pilon.g16083
WBGene00000985|C15H11.4|dhs-22	protein_coding	lifted_all.ident	chrV_pilon.g16520
WBGene00000986|R08H2.1|dhs-23	protein_coding	lifted_all.ident	chrV_pilon.g16802
WBGene00000987|Y60A3A.10|dhs-24	protein_coding	lifted_all.ident	chrV_pilon.g17992; chrV_pilon.g17994
WBGene00000988|F09E10.3|dhs-25	protein_coding	lifted_all.ident	chrX_pilon.g18449
WBGene00000989|ZK816.5|dhs-26	protein_coding	lifted_all.ident	chrX_pilon.g18744
WBGene00000990|C04F6.5|dhs-27	protein_coding	lifted_all.ident	chrX_pilon.g18754
WBGene00000991|M03A8.1|dhs-28	protein_coding	lifted_all.ident	chrX_pilon.g19303
WBGene00000992|F27D9.6|dhs-29	protein_coding	lifted_all.ident	chrX_pilon.g19446
WBGene00000993|T25G12.7|dhs-30	protein_coding	lifted_all.ident	chrX_pilon.g20993
WBGene00000994|F08B4.1|dic-1	protein_coding	lifted_all.ident	chrIV_pilon.g11136
WBGene00000995|C18D1.1|die-1	protein_coding	lifted_all.ident	chrII_pilon.g5657
WBGene00000996|F49E8.5|dif-1	protein_coding	lifted_all.ident	chrIV_pilon.g10864
WBGene00000998|K07E12.1|dig-1	protein_coding	lifted_all.ident	chrIII_pilon.g8002
WBGene00001000|C18A11.7|dim-1	protein_coding	lifted_all.ident	chrX_pilon.g19505
WBGene00001001|C04G2.6|dis-3	protein_coding	lifted_all.ident	chrIV_pilon.g11505
WBGene00001002|R01H10.1|div-1	protein_coding	lifted_all.ident	chrIII_pilon.g8828
WBGene00001005|T26A5.9|dlc-1	protein_coding	lifted_all.ident	chrIII_pilon.g7948
WBGene00001006|C25F6.2|dlg-1	protein_coding	lifted_all.ident	chrX_pilon.g19081
WBGene00001007|C39E9.14|dli-1	protein_coding	lifted_all.ident	chrIV_pilon.g12219
WBGene00001008|F33E2.2|dlk-1	protein_coding	lifted_all.ident	chrI_pilon.g2541
WBGene00001016|F43G6.1|dna-2	protein_coding	lifted_all.ident	chrII_pilon.g6033
WBGene00001017|ZK593.5|dnc-1	protein_coding	lifted_all.ident	chrIV_pilon.g11718
WBGene00001018|C28H8.12|dnc-2	protein_coding	lifted_all.ident	chrIII_pilon.g7827
WBGene00001019|B0035.14|dnj-1	protein_coding	lifted_all.ident	chrIV_pilon.g11818
WBGene00001020|B0035.2|dnj-2	protein_coding	lifted_all.ident	chrIV_pilon.g11821
WBGene00001021|C01G10.12|dnj-3	protein_coding	lifted_all.ident	chrV_pilon.g16686
WBGene00001022|C01G8.4|dnj-4	protein_coding	lifted_all.ident	chrI_pilon.g880
WBGene00001023|C04A2.7|dnj-5	protein_coding	lifted_all.ident	chrII_pilon.g4877
WBGene00001025|C55B6.2|dnj-7	protein_coding	lifted_all.ident	chrX_pilon.g19364
WBGene00001026|C56C10.13|dnj-8	protein_coding	lifted_all.ident	chrII_pilon.g4809
WBGene00001027|F11G11.7|dnj-9	protein_coding	lifted_all.ident	chrII_pilon.g4344
WBGene00001028|F22B7.5|dnj-10	protein_coding	lifted_all.ident	chrIII_pilon.g8437
WBGene00001029|F38A5.13|dnj-11	protein_coding	lifted_all.ident	chrIV_pilon.g10651
WBGene00001030|F39B2.10|dnj-12	protein_coding	lifted_all.ident	chrI_pilon.g2959
WBGene00001031|F54D5.8|dnj-13	protein_coding	lifted_all.ident	chrII_pilon.g5980
WBGene00001032|K02G10.8|dnj-14	protein_coding	lifted_all.ident	chrX_pilon.g18958
WBGene00001033|K08D10.2|dnj-15	protein_coding	lifted_all.ident	chrIV_pilon.g10138
WBGene00001034|R74.4|dnj-16	protein_coding	lifted_all.ident	chrIII_pilon.g7393
WBGene00001035|T03F6.2|dnj-17	protein_coding	lifted_all.ident	chrIII_pilon.g9338
WBGene00001036|T04A8.9|dnj-18	protein_coding	lifted_all.ident	chrIII_pilon.g7515
WBGene00001037|T05C3.5|dnj-19	protein_coding	lifted_all.ident	chrV_pilon.g14254
WBGene00001038|T15H9.7|dnj-20	protein_coding	lifted_all.ident	chrII_pilon.g5547
WBGene00001039|T19B4.4|dnj-21	protein_coding	lifted_all.ident	chrI_pilon.g976
WBGene00001040|T23B12.7|dnj-22	protein_coding	lifted_all.ident	chrV_pilon.g14989
WBGene00001041|T24H10.3|dnj-23	protein_coding	lifted_all.ident	chrII_pilon.g5410
WBGene00001042|W03A5.7|dnj-24	protein_coding	lifted_all.ident	chrIII_pilon.g7707
WBGene00001043|W07A8.3|dnj-25	protein_coding	lifted_all.ident	chrV_pilon.g18159
WBGene00001044|Y39C12A.8|dnj-26	protein_coding	lifted_all.ident	chrIV_pilon.g12030
WBGene00001045|Y47H9C.5|dnj-27	protein_coding	lifted_all.ident	chrI_pilon.g2353
WBGene00001046|Y54E10BL.4|dnj-28	protein_coding	lifted_all.ident	chrI_pilon.g440
WBGene00001047|Y63D3A.6|dnj-29	protein_coding	lifted_all.ident	chrI_pilon.g2855
WBGene00001048|Y71F9B.16|dnj-30	protein_coding	lifted_all.ident	chrI_pilon.g381
WBGene00001049|F33H2.1|dog-1	protein_coding	lifted_all.ident	chrI_pilon.g3002
WBGene00001050|F54C1.2|dom-3	protein_coding	lifted_all.ident	chrI_pilon.g819
WBGene00001051|C09G4.3|cks-1	protein_coding	lifted_all.ident	chrIV_pilon.g11100
WBGene00001052|F15A8.5|dop-1	protein_coding	lifted_all.ident	chrX_pilon.g18915
WBGene00001053|K09G1.4|dop-2	protein_coding	lifted_all.ident	chrV_pilon.g15289
WBGene00001054|T23F1.7|dpf-1	protein_coding	lifted_all.ident	chrV_pilon.g16829
WBGene00001055|C27C12.7|dpf-2	protein_coding	lifted_all.ident	chrX_pilon.g20651
WBGene00001056|K02F2.1|dpf-3	protein_coding	lifted_all.ident	chrI_pilon.g1254
WBGene00001057|F01F1.5|dpf-4	protein_coding	lifted_all.ident	chrIII_pilon.g7807
WBGene00001058|R11E3.8|dpf-5	protein_coding	lifted_all.ident	chrIV_pilon.g10282
WBGene00001059|F44B9.1|dpf-6	protein_coding	lifted_all.ident	chrIII_pilon.g8292
WBGene00001060|R11E3.7|dpf-7	protein_coding	lifted_all.ident	chrIV_pilon.g10281
WBGene00001061|T23G7.1|dpl-1	protein_coding	lifted_all.ident	chrII_pilon.g5427
WBGene00001062|R10D12.2|dpr-1	protein_coding	lifted_all.ident	chrV_pilon.g16377
WBGene00001063|M01E10.2|dpy-1	protein_coding	lifted_all.ident	chrIII_pilon.g7040
WBGene00001064|T14B4.6|dpy-2	protein_coding	lifted_all.ident	chrII_pilon.g4837
WBGene00001065|EGAP7.1|dpy-3	protein_coding	lifted_all.ident	chrX_pilon.g18572
WBGene00001066|Y41E3.2|dpy-4	protein_coding	lifted_all.ident	chrIV_pilon.g12564
WBGene00001067|F27C1.8|dpy-5	protein_coding	lifted_all.ident	chrI_pilon.g916
WBGene00001068|F16F9.2|dpy-6	protein_coding	lifted_all.ident	chrX_pilon.g19581
WBGene00001069|F46C8.6|dpy-7	protein_coding	lifted_all.ident	chrX_pilon.g19425
WBGene00001070|C31H2.2|dpy-8	protein_coding	lifted_all.ident	chrX_pilon.g19023
WBGene00001071|T21D12.2|dpy-9	protein_coding	lifted_all.ident	chrIV_pilon.g9470
WBGene00001072|T14B4.7|dpy-10	protein_coding	lifted_all.ident	chrII_pilon.g4835; chrII_pilon.g4836
WBGene00001073|F46E10.9|dpy-11	protein_coding	lifted_all.ident	chrV_pilon.g14452
WBGene00001074|F30B5.1|dpy-13	protein_coding	lifted_all.ident	chrIV_pilon.g10153
WBGene00001075|H27M09.4|dpy-14	protein_coding	lifted_all.ident	chrI_pilon.g1255
WBGene00001076|F54D8.1|dpy-17	protein_coding	lifted_all.ident	chrIII_pilon.g7644
WBGene00001077|Y47D3B.10|dpy-18	protein_coding	lifted_all.ident	chrIII_pilon.g9026
WBGene00001078|F22B7.10|dpy-19	protein_coding	lifted_all.ident	chrIII_pilon.g8442
WBGene00001079|T22B3.1|dpy-20	protein_coding	lifted_all.ident	chrIV_pilon.g11915
WBGene00001080|Y59A8B.1|dpy-21	protein_coding	lifted_all.ident	chrV_pilon.g17585
WBGene00001081|F47A4.2|dpy-22	protein_coding	lifted_all.ident	chrX_pilon.g19794
WBGene00001082|R160.1|dpy-23	protein_coding	lifted_all.ident	chrX_pilon.g18913
WBGene00001085|C25G4.5|dpy-26	protein_coding	lifted_all.ident	chrIV_pilon.g12080
WBGene00001086|R13G10.1|dpy-27	protein_coding	lifted_all.ident	chrIII_pilon.g7320
WBGene00001087|Y39A1B.3|dpy-28	protein_coding	lifted_all.ident	chrIII_pilon.g8939
WBGene00001088|ZK863.6|dpy-30	protein_coding	lifted_all.ident	chrV_pilon.g15947
WBGene00001089|K04A8.6|dre-1	protein_coding	lifted_all.ident	chrV_pilon.g14458
WBGene00001090|F15B10.2|drh-1	protein_coding	lifted_all.ident	chrIV_pilon.g10665
WBGene00001092|F53A2.5|dro-1	protein_coding	lifted_all.ident	chrIII_pilon.g9325
WBGene00001093|T12E12.4|drp-1	protein_coding	lifted_all.ident	chrIV_pilon.g10466
WBGene00001094|B0464.1|dars-1	protein_coding	lifted_all.ident	chrIII_pilon.g8629
WBGene00001095|F10C2.6|dars-2	protein_coding	lifted_all.ident	chrV_pilon.g15908
WBGene00001096|C18B12.3|dsc-1	protein_coding	lifted_all.ident	chrX_pilon.g20689
WBGene00001099|K02D7.4|dsc-4	protein_coding	lifted_all.ident	chrIV_pilon.g9484
WBGene00001101|C34F11.9|dsh-1	protein_coding	lifted_all.ident	chrII_pilon.g4449
WBGene00001102|C27A2.6|dsh-2	protein_coding	lifted_bad.trans	chrII_pilon.g4409
WBGene00001103|W09G12.4|dsl-1	protein_coding	lifted_all.ident	chrIV_pilon.g9639
WBGene00001104|W09G12.1|dsl-2	protein_coding	lifted_all.ident	chrIV_pilon.g9638
WBGene00001105|Y41D4B.10|dsl-3	protein_coding	lifted_all.ident	chrIV_pilon.g9706
WBGene00001106|F16B12.2|dsl-4	protein_coding	lifted_all.ident	chrX_pilon.g20518
WBGene00001107|F58B3.8|dsl-5	protein_coding	lifted_all.ident	chrIV_pilon.g11891
WBGene00001108|H02I12.4|dsl-6	protein_coding	lifted_all.ident	chrIV_pilon.g11845
WBGene00001109|F15B9.9|dsl-7	protein_coding	lifted_all.ident	chrV_pilon.g16152
WBGene00001110|F38B7.5|duo-1	protein_coding	lifted_all.ident	chrV_pilon.g15810
WBGene00001112|Y106G6H.12|duo-3	protein_coding	lifted_all.ident	chrI_pilon.g2047
WBGene00001113|F25H8.5|dur-1	protein_coding	lifted_all.ident	chrIV_pilon.g11451
WBGene00001115|F47G6.1|dyb-1	protein_coding	lifted_all.ident	chrI_pilon.g202
WBGene00001116|C33G3.1|dyc-1	protein_coding	lifted_all.ident	chrX_pilon.g20513
WBGene00001117|F54C1.5|dyf-1	protein_coding	lifted_all.ident	chrI_pilon.g817
WBGene00001118|ZK520.3|dyf-2	protein_coding	lifted_all.ident	chrIII_pilon.g9403
WBGene00001119|C04C3.5|dyf-3	protein_coding	lifted_all.ident	chrIV_pilon.g9961
WBGene00001121|M04C9.5|dyf-5	protein_coding	lifted_all.ident	chrI_pilon.g1789
WBGene00001122|F46F6.4|dyf-6	protein_coding	lifted_all.ident	chrX_pilon.g19896
WBGene00001123|C43C3.3|dyf-7	protein_coding	lifted_all.ident	chrX_pilon.g19780
WBGene00001127|C02H7.1|dyf-11	protein_coding	lifted_all.ident	chrX_pilon.g18321
WBGene00001129|C27H5.7|dyf-13	protein_coding	lifted_all.ident	chrII_pilon.g4955
WBGene00001130|C02C6.1|dyn-1	protein_coding	lifted_all.ident	chrX_pilon.g20765
WBGene00001131|F15D3.1|dys-1	protein_coding	lifted_all.ident	chrI_pilon.g2294
WBGene00001132|T11B7.4|alp-1	protein_coding	lifted_all.ident	chrIV_pilon.g11179; chrIV_pilon.g11181
WBGene00001133|Y48B6A.4|eat-2	protein_coding	lifted_all.ident	chrII_pilon.g6495
WBGene00001134|D2013.5|eat-3	protein_coding	lifted_all.ident	chrII_pilon.g5454
WBGene00001135|ZK512.6|eat-4	protein_coding	lifted_all.ident	chrIII_pilon.g8553
WBGene00001136|F13G3.8|eat-5	protein_coding	lifted_all.ident	chrI_pilon.g1364
WBGene00001137|B0365.3|eat-6	protein_coding	lifted_all.ident	chrV_pilon.g16178
WBGene00001145|C16C2.2|eat-16	protein_coding	lifted_all.ident	chrI_pilon.g1894
WBGene00001147|Y105E8A.7|eat-18	protein_coding	lifted_all.ident
WBGene00001148|H30A04.1|eat-20	protein_coding	lifted_all.ident	chrX_pilon.g20761
WBGene00001149|K02A4.1|bcat-1	protein_coding	lifted_all.ident	chrX_pilon.g20322
WBGene00001150|C29F3.1|ech-1.1	protein_coding	lifted_all.ident	chrV_pilon.g16795
WBGene00001151|F38H4.8|ech-2	protein_coding	lifted_all.ident	chrIV_pilon.g11949
WBGene00001152|F43H9.1|ech-3	protein_coding	lifted_all.ident	chrV_pilon.g14881
WBGene00001153|R06F6.9|ech-4	protein_coding	lifted_all.ident	chrII_pilon.g5815
WBGene00001154|F56B3.5|ech-5	protein_coding	lifted_all.ident	chrIV_pilon.g9573
WBGene00001155|T05G5.6|ech-6	protein_coding	lifted_all.ident	chrIII_pilon.g8694
WBGene00001156|Y105E8A.4|ech-7	protein_coding	lifted_all.ident	chrI_pilon.g2904
WBGene00001157|F01G10.2|ech-8	protein_coding	lifted_all.ident	chrIV_pilon.g11547
WBGene00001158|F01G10.3|ech-9	protein_coding	lifted_all.ident	chrIV_pilon.g11546
WBGene00001159|C26D10.5|eff-1	protein_coding	lifted_all.ident	chrII_pilon.g5222
WBGene00001160|F42A10.4|efk-1	protein_coding	lifted_all.ident	chrIII_pilon.g7869
WBGene00001161|Y102A5C.18|efl-1	protein_coding	lifted_all.ident	chrV_pilon.g17319
WBGene00001162|Y48C3A.17|efl-2	protein_coding	lifted_all.ident	chrII_pilon.g6359
WBGene00001163|C43F9.8|efn-2	protein_coding	lifted_all.ident	chrIV_pilon.g11623
WBGene00001164|F15A2.5|efn-3	protein_coding	lifted_all.ident	chrX_pilon.g20421
WBGene00001165|F56A11.3|efn-4	protein_coding	lifted_all.ident	chrIV_pilon.g9524
WBGene00001166|ZK328.2|eftu-2	protein_coding	lifted_all.ident	chrIII_pilon.g7843
WBGene00001167|F25H5.4|eef-2	protein_coding	lifted_all.ident	chrI_pilon.g1758
WBGene00001168|F31E3.5|eef-1A.1	protein_coding	lifted_all.ident	chrIII_pilon.g8043
WBGene00001169|R03G5.1|eef-1A.2	protein_coding	lifted_all.ident	chrX_pilon.g19473
WBGene00001170|F23B12.9|egl-1	protein_coding	lifted_all.ident	chrV_pilon.g16525
WBGene00001171|F16B3.1|egl-2	protein_coding	lifted_all.ident	chrV_pilon.g13205
WBGene00001172|C51E3.7|egl-3	protein_coding	lifted_all.ident	chrV_pilon.g15437
WBGene00001173|F55A8.2|egl-4	protein_coding	lifted_all.ident	chrIV_pilon.g9741
WBGene00001174|C08C3.1|egl-5	protein_coding	lifted_all.ident	chrIII_pilon.g8228
WBGene00001175|C46F4.1|egl-6	protein_coding	lifted_all.ident	chrX_pilon.g19140
WBGene00001177|B0348.4|egl-8	protein_coding	lifted_all.ident	chrV_pilon.g12926
WBGene00001178|F22E12.4|egl-9	protein_coding	lifted_all.ident	chrV_pilon.g15529
WBGene00001179|F28C1.2|egl-10	protein_coding	lifted_all.ident	chrV_pilon.g16022
WBGene00001182|T22B7.1|egl-13	protein_coding	lifted_all.ident	chrX_pilon.g19104
WBGene00001184|F58A3.2|egl-15	protein_coding	lifted_all.ident	chrX_pilon.g19993
WBGene00001185|F38G1.2|egl-17	protein_coding	lifted_all.ident	chrX_pilon.g18280
WBGene00001186|F55A8.1|egl-18	protein_coding	lifted_all.ident	chrIV_pilon.g9743
WBGene00001187|C48A7.1|egl-19	protein_coding	lifted_all.ident	chrIV_pilon.g10827
WBGene00001188|W08D2.1|egl-20	protein_coding	lifted_all.ident	chrIV_pilon.g11416
WBGene00001189|F01D4.4|egl-21	protein_coding	lifted_all.ident	chrIV_pilon.g11607
WBGene00001190|Y37A1B.11|egl-23	protein_coding	lifted_all.ident	chrIV_pilon.g12409
WBGene00001193|C23H3.1|egl-26	protein_coding	lifted_all.ident	chrII_pilon.g3038
WBGene00001194|C04A2.3|egl-27	protein_coding	lifted_all.ident	chrII_pilon.g4874
WBGene00001196|M01D7.7|egl-30	protein_coding	lifted_all.ident	chrI_pilon.g254
WBGene00001202|R07A4.1|egl-36	protein_coding	lifted_all.ident	chrX_pilon.g19942
WBGene00001204|C04G2.7|egl-38	protein_coding	lifted_all.ident	chrIV_pilon.g11506
WBGene00001207|R53.3|egl-43	protein_coding	lifted_all.ident	chrII_pilon.g5633
WBGene00001208|F28B12.2|egl-44	protein_coding	lifted_all.ident	chrII_pilon.g4649
WBGene00001209|C27D11.1|egl-45	protein_coding	lifted_all.ident	chrIII_pilon.g8229
WBGene00001210|K11G9.4|egl-46	protein_coding	lifted_all.ident	chrV_pilon.g14491
WBGene00001211|C50H2.2|egl-47	protein_coding	lifted_all.ident	chrV_pilon.g15367
WBGene00001214|F26A3.3|ego-1	protein_coding	lifted_all.ident	chrI_pilon.g1429
WBGene00001215|Y53H1C.2|ego-2	protein_coding	lifted_all.ident	chrI_pilon.g2260
WBGene00001223|ZK616.10|ehn-3	protein_coding	lifted_all.ident	chrIV_pilon.g10445
WBGene00001224|ZK1248.3|ehs-1	protein_coding	lifted_all.ident	chrII_pilon.g4620
WBGene00001225|Y54E2A.11|eif-3.B	protein_coding	lifted_all.ident	chrII_pilon.g6612
WBGene00001226|T23D8.4|eif-3.C	protein_coding	lifted_all.ident	chrI_pilon.g1945
WBGene00001227|R08D7.3|eif-3.D	protein_coding	lifted_all.ident	chrIII_pilon.g8516
WBGene00001228|B0511.10|eif-3.E	protein_coding	lifted_all.ident	chrI_pilon.g2099
WBGene00001229|D2013.7|eif-3.F	protein_coding	lifted_all.ident	chrII_pilon.g5456
WBGene00001230|F22B5.2|eif-3.G	protein_coding	lifted_all.ident	chrII_pilon.g5244
WBGene00001231|C41D11.2|eif-3.H	protein_coding	lifted_all.ident	chrI_pilon.g701
WBGene00001232|Y74C10AR.1|eif-3.I	protein_coding	lifted_all.ident	chrI_pilon.g344
WBGene00001233|T16G1.11|eif-3.K	protein_coding	lifted_all.ident	chrV_pilon.g16142
WBGene00001234|C47B2.5|eif-6	protein_coding	lifted_all.ident	chrI_pilon.g2629
WBGene00001235|Y41C4A.10|elb-1	protein_coding	lifted_all.ident	chrIII_pilon.g9079
WBGene00001236|Y82E9BR.15|elc-1	protein_coding	lifted_all.ident	chrIII_pilon.g6959
WBGene00001237|W03H1.2|elc-2	protein_coding	lifted_all.ident	chrX_pilon.g18502
WBGene00001239|F56H11.4|elo-1	protein_coding	lifted_all.ident	chrIV_pilon.g11341
WBGene00001240|F11E6.5|elo-2	protein_coding	lifted_all.ident	chrIV_pilon.g12916
WBGene00001241|D2024.3|elo-3	protein_coding	lifted_all.ident	chrIV_pilon.g10796
WBGene00001242|C40H1.4|elo-4	protein_coding	lifted_all.ident	chrIII_pilon.g8592
WBGene00001243|F41H10.7|elo-5	protein_coding	lifted_all.ident	chrIV_pilon.g10430
WBGene00001244|F41H10.8|elo-6	protein_coding	lifted_all.ident	chrIV_pilon.g10433
WBGene00001245|F56H11.3|elo-7	protein_coding	lifted_all.ident	chrIV_pilon.g11343
WBGene00001246|Y47D3A.30|elo-8	protein_coding	lifted_all.ident	chrIII_pilon.g9005
WBGene00001247|Y53F4B.2|elo-9	protein_coding	lifted_all.ident	chrII_pilon.g6632
WBGene00001248|F38A6.2|elp-1	protein_coding	lifted_all.ident	chrV_pilon.g18163
WBGene00001249|W09C2.1|elt-1	protein_coding	lifted_all.ident	chrIV_pilon.g11360
WBGene00001250|C33D3.1|elt-2	protein_coding	lifted_all.ident	chrX_pilon.g19909
WBGene00001251|K02B9.4|elt-3	protein_coding	lifted_all.ident	chrX_pilon.g20495
WBGene00001252|C39B10.6|elt-4	protein_coding	lifted_all.ident	chrX_pilon.g19908
WBGene00001253|F52C12.5|elt-6	protein_coding	lifted_all.ident	chrIV_pilon.g9744
WBGene00001258|Y80D3A.2|emb-4	protein_coding	lifted_all.ident	chrV_pilon.g17782; chrV_pilon.g17784
WBGene00001259|T04A8.14|emb-5	protein_coding	lifted_all.ident	chrIII_pilon.g7522
WBGene00001262|K10D2.6|emb-8	protein_coding	lifted_all.ident	chrIII_pilon.g7661
WBGene00001263|K04H4.1|emb-9	protein_coding	lifted_all.ident	chrIII_pilon.g8593
WBGene00001281|F10B5.6|emb-27	protein_coding	lifted_all.ident	chrII_pilon.g5174
WBGene00001284|F54C8.3|emb-30	protein_coding	lifted_all.ident	chrIII_pilon.g8615; chrIII_pilon.g8617
WBGene00001303|F32D8.6|emo-1	protein_coding	lifted_all.ident	chrV_pilon.g15630
WBGene00001309|M01D7.6|emr-1	protein_coding	lifted_all.ident	chrI_pilon.g255
WBGene00001310|F58E10.2|end-1	protein_coding	lifted_all.ident	chrV_pilon.g16394
WBGene00001311|F58E10.5|end-3	protein_coding	lifted_all.ident	chrV_pilon.g16402
WBGene00001320|ZK809.4|ent-1	protein_coding	lifted_all.ident	chrIV_pilon.g11905
WBGene00001324|R11E3.6|eor-1	protein_coding	lifted_all.ident	chrIV_pilon.g10280
WBGene00001325|C44H4.7|eor-2	protein_coding	lifted_all.ident	chrX_pilon.g20621
WBGene00001328|K08C7.3|epi-1	protein_coding	lifted_all.ident	chrIV_pilon.g11645
WBGene00001329|T04C10.2|epn-1	protein_coding	lifted_all.ident	chrX_pilon.g20649
WBGene00001330|Y57G11C.24|eps-8	protein_coding	lifted_all.ident	chrIV_pilon.g12553
WBGene00001331|F09B9.3|erd-2	protein_coding	lifted_all.ident	chrX_pilon.g19859
WBGene00001332|T07A9.5|eri-1	protein_coding	lifted_all.ident	chrIV_pilon.g9505
WBGene00001333|C01G8.5|erm-1	protein_coding	lifted_all.ident	chrI_pilon.g881
WBGene00001334|Y105E8B.8|ero-1	protein_coding	lifted_all.ident	chrI_pilon.g2938
WBGene00001335|F35A5.8	protein_coding	lifted_all.ident	chrX_pilon.g18822
WBGene00001336|Y41E3.4|qars-1	protein_coding	lifted_all.ident	chrIV_pilon.g12568
WBGene00001337|ZC434.5|ears-1	protein_coding	lifted_all.ident	chrI_pilon.g2018
WBGene00001338|T07A9.2|ears-2	protein_coding	lifted_all.ident	chrIV_pilon.g9497
WBGene00001340|T01D1.2|etr-1	protein_coding	lifted_all.ident	chrII_pilon.g3058
WBGene00001345|F29G9.4|fos-1	protein_coding	lifted_all.ident	chrV_pilon.g14358
WBGene00001352|H38K22.1|evl-14	protein_coding	lifted_all.ident	chrIII_pilon.g7417
WBGene00001358|F22B5.1|evl-20	protein_coding	lifted_all.ident	chrII_pilon.g5245
WBGene00001362|C46E1.3|exc-1	protein_coding	lifted_all.ident	chrX_pilon.g20754
WBGene00001365|Y105E8A.22|exc-4	protein_coding	lifted_all.ident	chrI_pilon.g2922
WBGene00001366|C33D9.1|exc-5	protein_coding	lifted_all.ident	chrIV_pilon.g11169
WBGene00001368|F35H8.5|exc-7	protein_coding	lifted_all.ident	chrII_pilon.g5531
WBGene00001371|F26H11.5|exl-1	protein_coding	lifted_all.ident	chrII_pilon.g6535
WBGene00001372|R09B3.1|exo-3	protein_coding	lifted_all.ident	chrI_pilon.g2364
WBGene00001373|H35N03.1|exp-1	protein_coding	lifted_all.ident	chrII_pilon.g4695
WBGene00001374|F12F3.1|exp-2	protein_coding	lifted_all.ident	chrV_pilon.g14388
WBGene00001377|C49A1.4|eya-1	protein_coding	lifted_all.ident	chrI_pilon.g2877
WBGene00001385|F02A9.2|far-1	protein_coding	lifted_all.ident	chrIII_pilon.g8540
WBGene00001386|F02A9.3|far-2	protein_coding	lifted_all.ident	chrIII_pilon.g8541
WBGene00001387|F15B9.1|far-3	protein_coding	lifted_all.ident	chrV_pilon.g16154
WBGene00001388|F15B9.2|far-4	protein_coding	lifted_all.ident	chrV_pilon.g16155
WBGene00001389|F15B9.3|far-5	protein_coding	lifted_all.ident	chrV_pilon.g16153
WBGene00001390|W02A2.2|far-6	protein_coding	lifted_all.ident	chrIV_pilon.g12274
WBGene00001391|K01A2.2|far-7	protein_coding	lifted_all.ident	chrII_pilon.g3089
WBGene00001392|K02F3.3|far-8	protein_coding	lifted_all.ident	chrIII_pilon.g6827
WBGene00001393|Y67H2A.8|fat-1	protein_coding	lifted_all.ident	chrIV_pilon.g12270
WBGene00001394|W02A2.1|fat-2	protein_coding	lifted_all.ident	chrIV_pilon.g12273
WBGene00001395|W08D2.4|fat-3	protein_coding	lifted_all.ident	chrIV_pilon.g11414
WBGene00001396|T13F2.1|fat-4	protein_coding	lifted_all.ident	chrIV_pilon.g11413
WBGene00001397|W06D12.3|fat-5	protein_coding	lifted_all.ident	chrV_pilon.g17539
WBGene00001398|VZK822L.1|fat-6	protein_coding	lifted_all.ident	chrIV_pilon.g11960
WBGene00001399|F10D2.9|fat-7	protein_coding	lifted_all.ident	chrV_pilon.g14611
WBGene00001400|F56E3.4|fax-1	protein_coding	lifted_all.ident	chrX_pilon.g18717
WBGene00001401|H12I13.4|fbf-1	protein_coding	lifted_all.ident	chrII_pilon.g4679
WBGene00001402|F21H12.5|fbf-2	protein_coding	lifted_all.ident	chrII_pilon.g4684
WBGene00001403|F56H11.1|fbl-1	protein_coding	lifted_all.ident	chrIV_pilon.g11345
WBGene00001404|K07A3.1|fbp-1	protein_coding	lifted_all.ident	chrI_pilon.g360
WBGene00001405|C04F12.10|fce-1	protein_coding	lifted_all.ident	chrI_pilon.g1890
WBGene00001406|F48F5.5|fce-2	protein_coding	lifted_all.ident	chrV_pilon.g18078
WBGene00001410|Y54F10AM.2|feh-1	protein_coding	lifted_all.ident	chrIII_pilon.g7125
WBGene00001411|F35D6.1|fem-1	protein_coding	lifted_all.ident	chrIV_pilon.g10465
WBGene00001412|T19C3.8|fem-2	protein_coding	lifted_all.ident	chrIII_pilon.g6787
WBGene00001413|C01F6.4|fem-3	protein_coding	lifted_all.ident	chrIV_pilon.g11238
WBGene00001414|F43G9.6|fer-1	protein_coding	lifted_all.ident	chrI_pilon.g1632
WBGene00001423|T01C3.7|fib-1	protein_coding	lifted_all.ident	chrV_pilon.g16663
WBGene00001424|F41G3.4|fis-1	protein_coding	lifted_all.ident	chrII_pilon.g4855
WBGene00001425|F13B9.8|fis-2	protein_coding	lifted_all.ident	chrX_pilon.g19548
WBGene00001426|F36H1.1|fkb-1	protein_coding	lifted_all.ident	chrIV_pilon.g11748
WBGene00001427|Y18D10A.19|fkb-2	protein_coding	lifted_all.ident	chrI_pilon.g2614
WBGene00001428|C05C8.3|fkb-3	protein_coding	lifted_all.ident	chrV_pilon.g14630
WBGene00001429|ZC455.10|fkb-4	protein_coding	lifted_all.ident	chrV_pilon.g16099
WBGene00001430|C50F2.6|fkb-5	protein_coding	lifted_all.ident	chrI_pilon.g606
WBGene00001431|F31D4.3|fkb-6	protein_coding	lifted_all.ident	chrV_pilon.g18183
WBGene00001432|B0511.1|fkb-7	protein_coding	lifted_all.ident	chrI_pilon.g2107
WBGene00001433|Y18D10A.25|fkb-8	protein_coding	lifted_all.ident	chrI_pilon.g2613
WBGene00001434|T14G12.4|fkh-2	protein_coding	lifted_all.ident	chrX_pilon.g18806
WBGene00001435|C29F7.4|fkh-3	protein_coding	lifted_all.ident	chrX_pilon.g20410
WBGene00001436|C29F7.5|fkh-4	protein_coding	lifted_all.ident	chrX_pilon.g20411
WBGene00001437|F26A1.2|fkh-5	protein_coding	lifted_all.ident	chrIII_pilon.g7559
WBGene00001438|B0286.5|fkh-6	protein_coding	lifted_all.ident	chrII_pilon.g4236
WBGene00001439|F26D12.1|fkh-7	protein_coding	lifted_all.ident	chrIV_pilon.g10470
WBGene00001440|F40H3.4|fkh-8	protein_coding	lifted_all.ident	chrII_pilon.g4702
WBGene00001441|K03C7.2|fkh-9	protein_coding	lifted_all.ident	chrX_pilon.g18825
WBGene00001442|C25A1.2|fkh-10	protein_coding	lifted_all.ident	chrI_pilon.g1983
WBGene00001443|B0523.5|fli-1	protein_coding	lifted_all.ident	chrIII_pilon.g8447
WBGene00001444|F23B2.5|flp-1	protein_coding	lifted_all.ident	chrIV_pilon.g11244
WBGene00001445|W07E11.3|flp-2	protein_coding	lifted_all.ident	chrX_pilon.g19848
WBGene00001446|W07E11.2|flp-3	protein_coding	lifted_all.ident	chrX_pilon.g19847
WBGene00001447|C18D1.3|flp-4	protein_coding	lifted_all.ident	chrII_pilon.g5654
WBGene00001448|C03G5.7|flp-5	protein_coding	lifted_all.ident	chrX_pilon.g19592
WBGene00001449|F07D3.2|flp-6	protein_coding	lifted_all.ident	chrV_pilon.g15254
WBGene00001450|F49E10.3|flp-7	protein_coding	lifted_all.ident	chrX_pilon.g19134
WBGene00001451|F31F6.4|flp-8	protein_coding	lifted_all.ident	chrX_pilon.g20665
WBGene00001452|C36H8.3|flp-9	protein_coding	lifted_all.ident	chrIV_pilon.g12139
WBGene00001453|T06C10.4|flp-10	protein_coding	lifted_all.ident	chrIV_pilon.g10941
WBGene00001454|K02G10.4|flp-11	protein_coding	lifted_all.ident	chrX_pilon.g18952
WBGene00001455|C05E11.8|flp-12	protein_coding	lifted_all.ident	chrX_pilon.g18941
WBGene00001456|F33D4.3|flp-13	protein_coding	lifted_all.ident	chrIV_pilon.g10890
WBGene00001457|Y37D8A.15|flp-14	protein_coding	lifted_all.ident	chrIII_pilon.g9258
WBGene00001458|ZK525.1|flp-15	protein_coding	lifted_all.ident	chrIII_pilon.g9401
WBGene00001459|F15D4.8|flp-16	protein_coding	lifted_all.ident	chrII_pilon.g6339
WBGene00001460|C52D10.11|flp-17	protein_coding	lifted_all.ident	chrIV_pilon.g12847
WBGene00001461|Y48D7A.2|flp-18	protein_coding	lifted_all.ident	chrX_pilon.g18686
WBGene00001462|M79.4|flp-19	protein_coding	lifted_all.ident	chrX_pilon.g19927
WBGene00001463|E01H11.3|flp-20	protein_coding	lifted_all.ident	chrX_pilon.g19735
WBGene00001464|C26F1.10|flp-21	protein_coding	lifted_all.ident	chrV_pilon.g14820
WBGene00001465|F02D10.5|flr-1	protein_coding	lifted_all.ident	chrX_pilon.g20416
WBGene00001466|F58H1.4|flr-2	protein_coding	lifted_all.ident	chrV_pilon.g15888
WBGene00001468|F09B12.6|flr-4	protein_coding	lifted_all.ident	chrX_pilon.g20703
WBGene00001470|ZK783.4|baz-2	protein_coding	lifted_all.ident	chrIII_pilon.g8204
WBGene00001475|F15B9.7|fmi-1	protein_coding	lifted_all.ident	chrV_pilon.g16160; chrV_pilon.g16161
WBGene00001476|K08C7.2|fmo-1	protein_coding	lifted_all.ident	chrIV_pilon.g11643
WBGene00001477|K08C7.5|fmo-2	protein_coding	lifted_all.ident	chrIV_pilon.g11647
WBGene00001478|Y39A1A.19|fmo-3	protein_coding	lifted_all.ident	chrIII_pilon.g8921
WBGene00001479|F53F4.5|fmo-4	protein_coding	lifted_all.ident	chrV_pilon.g16284
WBGene00001480|H24K24.5|fmo-5	protein_coding	lifted_all.ident	chrV_pilon.g13153
WBGene00001481|Y54E10A.4|fog-1	protein_coding	lifted_all.ident	chrI_pilon.g477
WBGene00001482|Y113G7B.5|fog-2	protein_coding	lifted_all.ident	chrV_pilon.g18042
WBGene00001483|C03C11.2|fog-3	protein_coding	lifted_all.ident	chrI_pilon.g1952
WBGene00001484|T07D1.4|fox-1	protein_coding	lifted_all.ident	chrX_pilon.g18620
WBGene00001485|Y113G7A.8|fre-1	protein_coding	lifted_all.ident	chrV_pilon.g18021
WBGene00001486|F59G1.7|frh-1	protein_coding	lifted_all.ident	chrII_pilon.g4646
WBGene00001487|T04B2.2|frk-1	protein_coding	lifted_all.ident	chrIV_pilon.g11486
WBGene00001488|ZK270.2|frm-1	protein_coding	lifted_some.ident	chrI_pilon.g2985
WBGene00001489|T04C9.6|frm-2	protein_coding	lifted_all.ident	chrIII_pilon.g7840
WBGene00001490|H05G16.1|frm-3	protein_coding	lifted_all.ident	chrX_pilon.g20092
WBGene00001491|C24A11.8|frm-4	protein_coding	lifted_all.ident	chrI_pilon.g906
WBGene00001492|Y38C1AB.8|frm-5.1	protein_coding	lifted_all.ident	chrIV_pilon.g9438
WBGene00001493|C51F7.1|frm-7	protein_coding	lifted_all.ident	chrV_pilon.g15975
WBGene00001494|H09G03.2|frm-8	protein_coding	lifted_all.ident	chrIII_pilon.g7218
WBGene00001495|F31B12.3|frm-9	protein_coding	lifted_all.ident	chrX_pilon.g19952
WBGene00001496|F25H9.5|frm-10	protein_coding	lifted_all.ident	chrV_pilon.g16250
WBGene00001497|T08B2.9|fars-1	protein_coding	lifted_all.ident	chrI_pilon.g1099
WBGene00001498|F22B5.9|fars-3	protein_coding	lifted_all.ident	chrII_pilon.g5251
WBGene00001499|C26E6.5|fsn-1	protein_coding	lifted_all.ident	chrIII_pilon.g7597
WBGene00001500|C54F6.14|ftn-1	protein_coding	lifted_all.ident	chrV_pilon.g14746
WBGene00001501|D1037.3|ftn-2	protein_coding	no.lift_good.trans
WBGene00001502|F52D10.3|ftt-2	protein_coding	lifted_all.ident	chrX_pilon.g20095
WBGene00001503|H14A12.2|fum-1	protein_coding	lifted_all.ident	chrIII_pilon.g8167
WBGene00001505|K08F8.3|fut-1	protein_coding	lifted_all.ident	chrII_pilon.g5336
WBGene00001506|EGAP9.2|fut-2	protein_coding	lifted_all.ident	chrV_pilon.g14469
WBGene00001507|K12H6.3|fut-4	protein_coding	lifted_all.ident	chrII_pilon.g3792
WBGene00001508|C10F3.6|fut-8	protein_coding	lifted_all.ident	chrV_pilon.g14356
WBGene00001509|ZK1248.14|fzo-1	protein_coding	lifted_all.ident	chrII_pilon.g4626
WBGene00001510|ZK1307.6|fzr-1	protein_coding	lifted_all.ident	chrII_pilon.g5551
WBGene00001511|ZK177.6|fzy-1	protein_coding	lifted_all.ident	chrII_pilon.g4519
WBGene00001512|ZC482.1|gab-1	protein_coding	lifted_all.ident	chrIII_pilon.g9234
WBGene00001513|T05H4.14|gad-1	protein_coding	lifted_all.ident	chrV_pilon.g14433
WBGene00001514|C05D2.5|xnd-1	protein_coding	lifted_all.ident	chrIII_pilon.g7750
WBGene00001515|T24C12.2|gap-1	protein_coding	lifted_no.ident	chrX_pilon.g18579
WBGene00001516|ZK899.8|gap-2	protein_coding	lifted_all.ident	chrX_pilon.g19751; chrX_pilon.g19753
WBGene00001517|C15B12.5|gar-1	protein_coding	lifted_all.ident	chrX_pilon.g19251
WBGene00001518|F47D12.1|gar-2	protein_coding	lifted_all.ident	chrIII_pilon.g7911
WBGene00001519|Y40H4A.1|gar-3	protein_coding	lifted_all.ident	chrV_pilon.g16562
WBGene00001520|K09A9.5|gas-1	protein_coding	lifted_all.ident	chrX_pilon.g20767
WBGene00001522|D2089.5|gbh-1	protein_coding	lifted_all.ident	chrII_pilon.g5792
WBGene00001523|M05D6.7|gbh-2	protein_coding	lifted_all.ident	chrII_pilon.g5262
WBGene00001526|T19A5.2|gck-1	protein_coding	lifted_all.ident	chrV_pilon.g15118
WBGene00001527|F37B12.2|gcs-1	protein_coding	lifted_all.ident	chrII_pilon.g5397
WBGene00001528|AH6.1|gcy-1	protein_coding	lifted_all.ident	chrII_pilon.g5512
WBGene00001529|R134.2|gcy-2	protein_coding	lifted_all.ident	chrII_pilon.g5511
WBGene00001530|R134.1|gcy-3	protein_coding	lifted_all.ident	chrII_pilon.g5510
WBGene00001531|ZK970.5|gcy-4	protein_coding	lifted_all.ident	chrII_pilon.g5701
WBGene00001532|ZK970.6|gcy-5	protein_coding	lifted_all.ident	chrII_pilon.g5703; chrII_pilon.g5705
WBGene00001533|B0024.6|gcy-6	protein_coding	lifted_all.ident	chrV_pilon.g15483
WBGene00001534|F52E1.4|gcy-7	protein_coding	lifted_all.ident	chrV_pilon.g14977
WBGene00001535|C49H3.1|gcy-8	protein_coding	lifted_all.ident	chrIV_pilon.g10958
WBGene00001536|ZK455.2|gcy-9	protein_coding	lifted_all.ident	chrX_pilon.g20055
WBGene00001537|C30G4.3|gcy-11	protein_coding	lifted_all.ident	chrX_pilon.g20965
WBGene00001538|F08B1.2|gcy-12	protein_coding	lifted_all.ident	chrII_pilon.g4462
WBGene00001539|F23H12.6|gcy-13	protein_coding	lifted_all.ident	chrV_pilon.g15989
WBGene00001540|ZC412.2|gcy-14	protein_coding	lifted_all.ident	chrV_pilon.g16625
WBGene00001541|ZC239.7|gcy-15	protein_coding	lifted_all.ident	chrII_pilon.g3891
WBGene00001542|W03F11.2|gcy-17	protein_coding	lifted_all.ident	chrI_pilon.g302
WBGene00001543|ZK896.8|gcy-18	protein_coding	lifted_all.ident	chrIV_pilon.g12152
WBGene00001544|C17F4.6|gcy-19	protein_coding	lifted_all.ident	chrII_pilon.g3920
WBGene00001545|F21H7.9|gcy-20	protein_coding	lifted_all.ident	chrV_pilon.g17096
WBGene00001546|F22E5.3|gcy-21	protein_coding	lifted_all.ident	chrII_pilon.g3742
WBGene00001547|T03D8.5|gcy-22	protein_coding	lifted_all.ident	chrV_pilon.g18176
WBGene00001548|T26C12.4|gcy-23	protein_coding	lifted_all.ident	chrIV_pilon.g9933
WBGene00001549|Y105C5B.2|gcy-25	protein_coding	lifted_all.ident	chrIV_pilon.g12665
WBGene00001550|C06A12.4|gcy-27	protein_coding	lifted_all.ident	chrIV_pilon.g12907
WBGene00001551|T07D1.1|gcy-31	protein_coding	lifted_all.ident	chrX_pilon.g18617
WBGene00001552|C06B3.8|gcy-32	protein_coding	lifted_all.ident	chrV_pilon.g16367
WBGene00001553|F57F5.2|gcy-33	protein_coding	lifted_all.ident	chrV_pilon.g15899
WBGene00001554|M04G12.3|gcy-34	protein_coding	lifted_all.ident	chrV_pilon.g16231
WBGene00001555|T04D3.4|gcy-35	protein_coding	lifted_all.ident	chrI_pilon.g2707; chrI_pilon.g2709
WBGene00001556|C46E1.2|gcy-36	protein_coding	lifted_all.ident	chrX_pilon.g20755
WBGene00001557|C54E4.3|gcy-37	protein_coding	lifted_all.ident	chrIV_pilon.g9775
WBGene00001558|Y57G11C.10|gdi-1	protein_coding	lifted_all.ident	chrIV_pilon.g12535
WBGene00001559|F45H7.2|gei-1	protein_coding	lifted_all.ident	chrIII_pilon.g7237
WBGene00001560|T22H6.6|gei-3	protein_coding	lifted_all.ident	chrX_pilon.g20314
WBGene00001561|W07B3.2|gei-4	protein_coding	lifted_all.ident	chrIII_pilon.g6746
WBGene00001562|B0513.1|lin-66	protein_coding	lifted_all.ident	chrIV_pilon.g12400
WBGene00001563|C05C8.4|gei-6	protein_coding	lifted_all.ident	chrV_pilon.g14631
WBGene00001564|C05E4.9|icl-1	protein_coding	lifted_all.ident	chrV_pilon.g13096
WBGene00001565|C14B9.6|gei-8	protein_coding	lifted_all.ident	chrIII_pilon.g8310
WBGene00001566|C28C12.9|acdh-13	protein_coding	lifted_all.ident	chrIV_pilon.g11095
WBGene00001568|F32H2.1|snpc-4	protein_coding	lifted_all.ident	chrI_pilon.g1710
WBGene00001569|F52D2.4|meg-3	protein_coding	lifted_all.ident	chrX_pilon.g18541
WBGene00001570|F58A4.11|gei-13	protein_coding	lifted_all.ident	chrIII_pilon.g8671
WBGene00001571|K01C8.5|gei-14	protein_coding	lifted_all.ident	chrII_pilon.g5206
WBGene00001572|M03A8.4|gei-15	protein_coding	lifted_all.ident	chrX_pilon.g19304
WBGene00001574|W10D5.3|gei-17	protein_coding	lifted_all.ident	chrI_pilon.g1744
WBGene00001575|Y37A1B.15|gei-18	protein_coding	lifted_all.ident	chrIV_pilon.g12406
WBGene00001577|T12A7.1|gem-4	protein_coding	lifted_all.ident	chrIV_pilon.g11925
WBGene00001578|R12A1.4|ges-1	protein_coding	lifted_all.ident	chrV_pilon.g13216
WBGene00001579|F56A11.1|gex-2	protein_coding	lifted_all.ident	chrIV_pilon.g9526; chrIV_pilon.g9528
WBGene00001580|F28D1.10|gex-3	protein_coding	lifted_all.ident	chrIV_pilon.g12067
WBGene00001581|F57F4.3|gfi-1	protein_coding	lifted_no.ident	chrV_pilon.g14426
WBGene00001582|K02A11.1|gfi-2	protein_coding	lifted_all.ident	chrI_pilon.g1896
WBGene00001583|M163.4|gfi-3	protein_coding	lifted_all.ident	chrX_pilon.g20591
WBGene00001584|F45E4.10|nrde-4	protein_coding	lifted_all.ident	chrIV_pilon.g10885
WBGene00001585|M04B2.3|gfl-1	protein_coding	lifted_all.ident	chrIV_pilon.g11870
WBGene00001586|C09G5.1|ggr-1	protein_coding	lifted_all.ident	chrII_pilon.g5793
WBGene00001587|C45B2.4|ggr-2	protein_coding	lifted_all.ident	chrX_pilon.g19163
WBGene00001588|F09C12.1|ggr-3	protein_coding	lifted_all.ident	chrII_pilon.g4423
WBGene00001589|H04J21.3|gip-1	protein_coding	lifted_all.ident	chrIII_pilon.g7090
WBGene00001590|C45G3.3	protein_coding	lifted_all.ident	chrI_pilon.g1763
WBGene00001591|F11A5.10|glc-1	protein_coding	lifted_all.ident	chrV_pilon.g17082
WBGene00001592|F25F8.2|glc-2	protein_coding	lifted_all.ident	chrI_pilon.g791
WBGene00001593|ZC317.3|glc-3	protein_coding	lifted_all.ident	chrV_pilon.g14242
WBGene00001594|C27H5.8|glc-4	protein_coding	lifted_all.ident	chrII_pilon.g4956
WBGene00001595|T23G11.3|gld-1	protein_coding	lifted_all.ident	chrI_pilon.g1440
WBGene00001596|ZC308.1|gld-2	protein_coding	lifted_all.ident	chrI_pilon.g1142; chrI_pilon.g1143
WBGene00001597|T07F8.3|gld-3	protein_coding	lifted_all.ident	chrII_pilon.g4949
WBGene00001598|T21G5.3|glh-1	protein_coding	lifted_all.ident	chrI_pilon.g1260
WBGene00001599|C55B7.1|glh-2	protein_coding	lifted_all.ident	chrI_pilon.g1175
WBGene00001600|B0414.6|glh-3	protein_coding	lifted_all.ident	chrI_pilon.g995
WBGene00001601|T12F5.3|glh-4	protein_coding	lifted_all.ident	chrI_pilon.g561
WBGene00001602|C45B2.5|gln-1	protein_coding	lifted_all.ident	chrX_pilon.g19161
WBGene00001603|K03H1.1|gln-2	protein_coding	lifted_all.ident	chrIII_pilon.g8749
WBGene00001604|Y105C5B.28|gln-3	protein_coding	lifted_all.ident	chrIV_pilon.g12692
WBGene00001606|F26D10.10|gln-5	protein_coding	lifted_all.ident	chrIV_pilon.g12862
WBGene00001607|C28D4.3|gln-6	protein_coding	lifted_all.ident	chrIV_pilon.g11394
WBGene00001608|R07B1.8	protein_coding	lifted_all.ident	chrX_pilon.g19807
WBGene00001609|F02A9.6|glp-1	protein_coding	lifted_all.ident	chrIII_pilon.g8543
WBGene00001612|C06E1.4|glr-1	protein_coding	lifted_all.ident	chrIII_pilon.g8426
WBGene00001613|B0280.12|glr-2	protein_coding	lifted_all.ident	chrIII_pilon.g8088
WBGene00001614|K10D3.1|glr-3	protein_coding	lifted_all.ident	chrI_pilon.g1315
WBGene00001615|C06A8.9|glr-4	protein_coding	lifted_all.ident	chrII_pilon.g5099; chrII_pilon.g5101
WBGene00001616|ZC196.7|glr-5	protein_coding	lifted_all.ident	chrV_pilon.g15062
WBGene00001617|F41B4.4|glr-6	protein_coding	lifted_all.ident	chrX_pilon.g19308
WBGene00001618|C43H6.9|glr-7	protein_coding	lifted_all.ident	chrX_pilon.g18616
WBGene00001619|F22A3.3|glr-8	protein_coding	lifted_all.ident	chrX_pilon.g19254
WBGene00001620|C12D12.2|glt-1	protein_coding	lifted_all.ident	chrX_pilon.g18766
WBGene00001621|K08F4.4|glt-3	protein_coding	lifted_all.ident	chrIV_pilon.g11514
WBGene00001622|T22E5.2|glt-4	protein_coding	lifted_all.ident	chrX_pilon.g19229
WBGene00001623|Y53C12A.2|glt-5	protein_coding	lifted_all.ident	chrII_pilon.g5576
WBGene00001624|R05G6.6|glt-6	protein_coding	lifted_all.ident	chrIV_pilon.g10851
WBGene00001625|W03G1.1|glt-7	protein_coding	lifted_all.ident	chrIV_pilon.g9522
WBGene00001626|F44F4.6|gly-1	protein_coding	lifted_all.ident	chrII_pilon.g5834
WBGene00001627|C55B7.2|gly-2	protein_coding	lifted_all.ident	chrI_pilon.g1173
WBGene00001628|ZK688.8|gly-3	protein_coding	lifted_all.ident	chrIII_pilon.g8254
WBGene00001629|Y116F11B.12|gly-4	protein_coding	lifted_all.ident	chrV_pilon.g17982
WBGene00001630|Y39E4B.12|gly-5	protein_coding	lifted_all.ident	chrIII_pilon.g9297
WBGene00001631|H38K22.5|gly-6	protein_coding	lifted_all.ident	chrIII_pilon.g7422
WBGene00001632|Y46H3A.6|gly-7	protein_coding	lifted_all.ident	chrV_pilon.g13314
WBGene00001633|Y66A7A.6|gly-8	protein_coding	lifted_all.ident	chrIII_pilon.g9063
WBGene00001635|Y45F10D.3|gly-10	protein_coding	lifted_all.ident	chrIV_pilon.g12376
WBGene00001636|Y75B8A.9|gly-11	protein_coding	lifted_all.ident	chrIII_pilon.g9147
WBGene00001637|F48E3.1|gly-12	protein_coding	lifted_all.ident	chrX_pilon.g19416
WBGene00001638|B0416.6|gly-13	protein_coding	lifted_all.ident	chrX_pilon.g19725
WBGene00001639|M01F1.1|gly-14	protein_coding	lifted_all.ident	chrIII_pilon.g7264
WBGene00001640|C54C8.11|gly-15	protein_coding	lifted_all.ident	chrI_pilon.g2511
WBGene00001641|T15D6.2|gly-16	protein_coding	lifted_all.ident	chrI_pilon.g2479
WBGene00001642|T15D6.3|gly-17	protein_coding	lifted_all.ident	chrI_pilon.g2478
WBGene00001643|F22D6.11|gly-18	protein_coding	lifted_all.ident	chrI_pilon.g1312
WBGene00001644|F22D6.12|gly-19	protein_coding	lifted_all.ident	chrI_pilon.g1313
WBGene00001645|C03E10.4|gly-20	protein_coding	lifted_all.ident	chrV_pilon.g15733
WBGene00001646|B0024.12|gna-1	protein_coding	lifted_all.ident	chrV_pilon.g15487
WBGene00001647|T23G11.2|gna-2	protein_coding	lifted_all.ident	chrI_pilon.g1441
WBGene00001648|C26C6.2|goa-1	protein_coding	lifted_all.ident	chrI_pilon.g1404
WBGene00001649|H13N06.3|gob-1	protein_coding	lifted_all.ident	chrX_pilon.g20757
WBGene00001650|F25H8.3|gon-1	protein_coding	lifted_all.ident	chrIV_pilon.g11455
WBGene00001651|T01H8.5|gon-2	protein_coding	lifted_all.ident	chrI_pilon.g1614
WBGene00001653|K04D7.5|gon-4	protein_coding	lifted_all.ident	chrIV_pilon.g11534
WBGene00001660|C34E10.3|gop-1	protein_coding	lifted_all.ident	chrIII_pilon.g7675
WBGene00001661|C34E10.2|gop-2	protein_coding	lifted_all.ident	chrIII_pilon.g7676
WBGene00001662|C34E10.1|gop-3	protein_coding	lifted_all.ident	chrIII_pilon.g7677
WBGene00001663|T19C4.6|gpa-1	protein_coding	lifted_all.ident	chrV_pilon.g15708
WBGene00001664|F38E1.5|gpa-2	protein_coding	lifted_all.ident	chrV_pilon.g14971
WBGene00001665|E02C12.5|gpa-3	protein_coding	lifted_all.ident	chrV_pilon.g15237
WBGene00001666|T07A9.7|gpa-4	protein_coding	lifted_all.ident	chrIV_pilon.g9502
WBGene00001667|F53B1.7|gpa-5	protein_coding	lifted_all.ident	chrX_pilon.g18570
WBGene00001668|F48C11.1|gpa-6	protein_coding	lifted_all.ident	chrX_pilon.g20360
WBGene00001669|R10H10.5|gpa-7	protein_coding	lifted_all.ident	chrIV_pilon.g11589
WBGene00001670|F56H9.3|gpa-8	protein_coding	lifted_all.ident	chrV_pilon.g16061
WBGene00001671|F56H9.4|gpa-9	protein_coding	lifted_all.ident	chrV_pilon.g16063
WBGene00001672|C55H1.2|gpa-10	protein_coding	lifted_all.ident	chrV_pilon.g14537
WBGene00001673|C16A11.1|gpa-11	protein_coding	lifted_all.ident	chrII_pilon.g4207
WBGene00001674|F18G5.3|gpa-12	protein_coding	lifted_all.ident	chrX_pilon.g19715
WBGene00001675|F18E2.5|gpa-13	protein_coding	lifted_all.ident	chrV_pilon.g16091
WBGene00001676|B0207.3|gpa-14	protein_coding	lifted_all.ident	chrI_pilon.g1027
WBGene00001677|M04C7.1|gpa-15	protein_coding	lifted_all.ident	chrI_pilon.g1612
WBGene00001678|Y95B8A.5|gpa-16	protein_coding	lifted_all.ident	chrI_pilon.g131
WBGene00001679|F13D12.7|gpb-1	protein_coding	lifted_all.ident	chrII_pilon.g6025
WBGene00001680|F52A8.2|gpb-2	protein_coding	lifted_all.ident	chrI_pilon.g1368
WBGene00001681|K02A4.2|gpc-1	protein_coding	lifted_all.ident
WBGene00001682|F08B6.2|gpc-2	protein_coding	lifted_all.ident
WBGene00001683|T09F3.3|gpd-1	protein_coding	lifted_all.ident	chrII_pilon.g5720
WBGene00001684|K10B3.8|gpd-2	protein_coding	lifted_all.ident	chrX_pilon.g18705
WBGene00001685|K10B3.7|gpd-3	protein_coding	lifted_all.ident	chrX_pilon.g18704
WBGene00001686|F33H1.2|gpd-4	protein_coding	lifted_all.ident	chrII_pilon.g5676
WBGene00001687|F59D12.4|gpn-1	protein_coding	lifted_all.ident	chrX_pilon.g20784
WBGene00001688|F22B7.13|gpr-1	protein_coding	lifted_all.ident	chrIII_pilon.g8436
WBGene00001689|C38C10.4|gpr-2	protein_coding	lifted_all.ident	chrIII_pilon.g8602
WBGene00001690|R08B4.1|grd-1	protein_coding	lifted_all.ident	chrX_pilon.g20010
WBGene00001691|F46B3.5|grd-2	protein_coding	lifted_all.ident	chrV_pilon.g18131
WBGene00001692|W05E7.1|grd-3	protein_coding	lifted_all.ident	chrIV_pilon.g9968
WBGene00001693|T01B10.1|grd-4	protein_coding	lifted_all.ident	chrX_pilon.g19588
WBGene00001694|F41E6.2|grd-5	protein_coding	lifted_all.ident	chrV_pilon.g15033
WBGene00001695|T18H9.1|grd-6	protein_coding	lifted_all.ident	chrV_pilon.g15201
WBGene00001696|F46H5.6|grd-7	protein_coding	lifted_all.ident	chrX_pilon.g19374
WBGene00001697|C37C3.4|grd-8	protein_coding	lifted_all.ident	chrV_pilon.g14832
WBGene00001698|C04E6.6|grd-9	protein_coding	lifted_all.ident	chrV_pilon.g14333
WBGene00001699|F09D12.1|grd-10	protein_coding	lifted_all.ident	chrIV_pilon.g9969
WBGene00001700|K02E2.2|grd-11	protein_coding	lifted_all.ident	chrV_pilon.g18068
WBGene00001701|F02D8.2|grd-12	protein_coding	lifted_all.ident	chrV_pilon.g16655
WBGene00001702|W05E7.3|grd-13	protein_coding	lifted_all.ident	chrIV_pilon.g9967
WBGene00001703|T01B10.2|grd-14	protein_coding	lifted_all.ident	chrX_pilon.g19587
WBGene00001704|Y87G2A.15|grd-15	protein_coding	lifted_all.ident	chrI_pilon.g2751
WBGene00001705|Y69A2AL.1|grd-16	protein_coding	lifted_all.ident	chrIV_pilon.g9808
WBGene00001707|Y48G8AR.1|grh-1	protein_coding	lifted_all.ident	chrI_pilon.g178
WBGene00001708|F19C6.1|grk-1	protein_coding	lifted_all.ident	chrX_pilon.g19829
WBGene00001709|W02B3.2|grk-2	protein_coding	lifted_all.ident	chrIII_pilon.g6797
WBGene00001710|C24G6.7|grl-1	protein_coding	lifted_all.ident	chrV_pilon.g14259
WBGene00001711|T16G1.8|grl-2	protein_coding	lifted_all.ident	chrV_pilon.g16139
WBGene00001712|K03B8.7|grl-3	protein_coding	lifted_all.ident	chrV_pilon.g15767
WBGene00001713|F42C5.7|grl-4	protein_coding	lifted_all.ident	chrIV_pilon.g10814
WBGene00001714|Y47D7A.5|grl-5	protein_coding	lifted_all.ident	chrV_pilon.g13997
WBGene00001715|K10C2.5|grl-6	protein_coding	lifted_all.ident	chrX_pilon.g19241
WBGene00001716|T02E9.2|grl-7	protein_coding	lifted_all.ident	chrV_pilon.g15751
WBGene00001717|ZC487.5|grl-8	protein_coding	lifted_all.ident	chrV_pilon.g14503
WBGene00001718|ZC487.4|grl-9	protein_coding	lifted_all.ident	chrV_pilon.g14502
WBGene00001719|C26F1.5|grl-10	protein_coding	lifted_all.ident	chrV_pilon.g14815
WBGene00001720|ZK512.9|grl-11	protein_coding	lifted_all.ident	chrIII_pilon.g8549
WBGene00001721|F28A12.2|grl-12	protein_coding	lifted_all.ident	chrV_pilon.g15040
WBGene00001722|F32D1.4|grl-13	protein_coding	lifted_all.ident	chrV_pilon.g13981
WBGene00001723|T03D8.4|grl-14	protein_coding	lifted_all.ident	chrV_pilon.g18177
WBGene00001724|Y75B8A.20|grl-15	protein_coding	lifted_all.ident	chrIII_pilon.g9158
WBGene00001725|Y65B4BR.6|grl-16	protein_coding	lifted_all.ident	chrI_pilon.g91
WBGene00001726|C56A3.1|grl-17	protein_coding	lifted_all.ident	chrV_pilon.g16271
WBGene00001727|T05C3.4|grl-18	protein_coding	lifted_all.ident	chrV_pilon.g14251
WBGene00001728|R02D3.6|grl-19	protein_coding	lifted_all.ident	chrIV_pilon.g9467
WBGene00001729|C23H5.9|grl-20	protein_coding	lifted_all.ident	chrIV_pilon.g9770
WBGene00001730|ZC168.5|grl-21	protein_coding	lifted_all.ident	chrIV_pilon.g11664
WBGene00001731|W03A5.3|grl-22	protein_coding	lifted_all.ident	chrIII_pilon.g7706
WBGene00001732|E02A10.2|grl-23	protein_coding	lifted_all.ident	chrV_pilon.g16045
WBGene00001733|F11E6.2|grl-24	protein_coding	lifted_all.ident	chrIV_pilon.g12921
WBGene00001734|ZK643.8|grl-25	protein_coding	lifted_all.ident	chrIII_pilon.g8513
WBGene00001735|K02D7.6|grl-26	protein_coding	lifted_all.ident	chrIV_pilon.g9485
WBGene00001736|F40C5.3|grl-27	protein_coding	lifted_all.ident	chrV_pilon.g13788
WBGene00001737|T24A6.15|grl-28	protein_coding	lifted_all.ident	chrV_pilon.g13780
WBGene00001738|T24A6.18|grl-29	protein_coding	lifted_all.ident	chrV_pilon.g13782
WBGene00001739|T24A6.3|grl-30	protein_coding	lifted_all.ident	chrV_pilon.g13783
WBGene00001740|ZC395.6|gro-1	protein_coding	lifted_all.ident	chrIII_pilon.g7678
WBGene00001743|K06H7.4|grp-1	protein_coding	lifted_all.ident	chrIII_pilon.g8303
WBGene00001744|T10F2.1|gars-1	protein_coding	lifted_all.ident	chrIII_pilon.g7651
WBGene00001745|R06A10.2|gsa-1	protein_coding	lifted_all.ident	chrI_pilon.g156
WBGene00001746|Y18D10A.5|gsk-3	protein_coding	lifted_all.ident	chrI_pilon.g2598
WBGene00001747|F29F11.6|gsp-1	protein_coding	lifted_all.ident	chrV_pilon.g15582
WBGene00001748|F56C9.1|gsp-2	protein_coding	lifted_all.ident	chrIII_pilon.g8142
WBGene00001749|R107.7|gst-1	protein_coding	lifted_all.ident	chrIII_pilon.g8536
WBGene00001750|K08F4.6|gst-2	protein_coding	lifted_all.ident	chrIV_pilon.g11518
WBGene00001751|K08F4.11|gst-3	protein_coding	lifted_all.ident	chrIV_pilon.g11517
WBGene00001752|K08F4.7|gst-4	protein_coding	lifted_all.ident	chrIV_pilon.g11519
WBGene00001753|R03D7.6|gst-5	protein_coding	lifted_all.ident	chrII_pilon.g5850
WBGene00001754|F11G11.3|gst-6	protein_coding	lifted_all.ident	chrII_pilon.g4353
WBGene00001755|F11G11.2|gst-7	protein_coding	lifted_all.ident	chrII_pilon.g4354
WBGene00001756|F11G11.1|gst-8	protein_coding	lifted_all.ident	chrII_pilon.g4355
WBGene00001757|R05F9.5|gst-9	protein_coding	lifted_all.ident
WBGene00001758|Y45G12C.2|gst-10	protein_coding	lifted_all.ident
WBGene00001759|R11G1.3|gst-11	protein_coding	lifted_all.ident	chrX_pilon.g18786
WBGene00001760|F37B1.2|gst-12	protein_coding	lifted_all.ident	chrII_pilon.g6393
WBGene00001761|T26C5.1|gst-13	protein_coding	lifted_all.ident	chrII_pilon.g5437
WBGene00001762|F37B1.3|gst-14	protein_coding	lifted_all.ident	chrII_pilon.g6392
WBGene00001763|F37B1.4|gst-15	protein_coding	lifted_all.ident	chrII_pilon.g6391
WBGene00001764|F37B1.5|gst-16	protein_coding	lifted_all.ident	chrII_pilon.g6394
WBGene00001765|F37B1.6|gst-17	protein_coding	lifted_all.ident	chrII_pilon.g6397
WBGene00001766|F37B1.7|gst-18	protein_coding	lifted_all.ident	chrII_pilon.g6398
WBGene00001767|F37B1.8|gst-19	protein_coding	lifted_all.ident	chrII_pilon.g6396
WBGene00001768|Y48E1B.10|gst-20	protein_coding	lifted_all.ident	chrII_pilon.g6389
WBGene00001769|ZK697.6|gst-21	protein_coding	lifted_all.ident	chrV_pilon.g13292
WBGene00001770|F21H7.1|gst-22	protein_coding	lifted_all.ident	chrV_pilon.g17088
WBGene00001771|T28A11.11|gst-23	protein_coding	lifted_all.ident	chrV_pilon.g13679
WBGene00001772|F37B1.1|gst-24	protein_coding	lifted_all.ident	chrII_pilon.g6390
WBGene00001773|F37F2.3|gst-25	protein_coding	lifted_all.ident	chrI_pilon.g198
WBGene00001774|Y53F4B.29|gst-26	protein_coding	lifted_all.ident	chrII_pilon.g6667
WBGene00001775|Y53F4B.30|gst-27	protein_coding	lifted_all.ident	chrII_pilon.g6668
WBGene00001776|Y53F4B.31|gst-28	protein_coding	lifted_all.ident	chrII_pilon.g6669
WBGene00001777|Y53F4B.32|gst-29	protein_coding	lifted_all.ident	chrII_pilon.g6670
WBGene00001778|ZK546.11|gst-30	protein_coding	lifted_all.ident	chrII_pilon.g4369
WBGene00001779|Y53F4B.35|gst-31	protein_coding	lifted_all.ident	chrII_pilon.g6673
WBGene00001780|Y53F4B.37|gst-32	protein_coding	lifted_all.ident	chrII_pilon.g6675
WBGene00001781|C02A12.1|gst-33	protein_coding	lifted_all.ident	chrV_pilon.g13752
WBGene00001782|Y1H11.1|gst-34	protein_coding	lifted_all.ident	chrII_pilon.g6676
WBGene00001783|Y1H11.2|gst-35	protein_coding	lifted_all.ident	chrII_pilon.g6677
WBGene00001784|R07B1.4|gst-36	protein_coding	lifted_all.ident	chrX_pilon.g19802
WBGene00001785|Y32G9A.1|gst-37	protein_coding	lifted_all.ident	chrV_pilon.g13339
WBGene00001786|F35E8.8|gst-38	protein_coding	lifted_all.ident	chrV_pilon.g16969
WBGene00001787|Y53F4B.33|gst-39	protein_coding	lifted_all.ident	chrII_pilon.g6671
WBGene00001788|F56B3.10|gst-40	protein_coding	lifted_all.ident	chrIV_pilon.g9562
WBGene00001789|R13D7.7|gst-41	protein_coding	lifted_all.ident	chrV_pilon.g14689
WBGene00001790|D1053.1|gst-42	protein_coding	lifted_all.ident	chrX_pilon.g20122
WBGene00001791|Y71F9AL.5|gst-43	protein_coding	lifted_all.ident	chrI_pilon.g421
WBGene00001792|F13A7.10|gst-44	protein_coding	lifted_all.ident	chrV_pilon.g17134
WBGene00001793|Y46G5A.31|gsy-1	protein_coding	lifted_all.ident	chrII_pilon.g6273
WBGene00001794|K04D7.3|gta-1	protein_coding	lifted_all.ident	chrIV_pilon.g11532
WBGene00001795|C05C12.3|gtl-1	protein_coding	lifted_all.ident	chrIV_pilon.g11806; chrIV_pilon.g11808
WBGene00001796|F54D1.5|gtl-2	protein_coding	lifted_all.ident	chrIV_pilon.g11814
WBGene00001803|C14F11.3|lite-1	protein_coding	lifted_all.ident	chrX_pilon.g19196
WBGene00001804|ZC504.5|gur-3	protein_coding	lifted_all.ident	chrX_pilon.g19898
WBGene00001805|K09E4.5|gur-4	protein_coding	lifted_all.ident	chrII_pilon.g6481
WBGene00001806|ZK622.2|gur-5	protein_coding	lifted_all.ident	chrII_pilon.g4458
WBGene00001808|T10G3.6|gut-2	protein_coding	lifted_all.ident	chrV_pilon.g16259
WBGene00001811|C30H6.6|haf-1	protein_coding	lifted_all.ident	chrIV_pilon.g12892
WBGene00001812|F43E2.4|haf-2	protein_coding	lifted_all.ident	chrII_pilon.g5000
WBGene00001813|F57A10.3|haf-3	protein_coding	lifted_all.ident	chrV_pilon.g16914
WBGene00001814|W04C9.1|haf-4	protein_coding	lifted_all.ident	chrI_pilon.g76
WBGene00001815|W09D6.6|hmt-1	protein_coding	lifted_all.ident	chrIII_pilon.g8992
WBGene00001816|Y48G8AL.11|haf-6	protein_coding	lifted_all.ident	chrI_pilon.g168
WBGene00001817|Y50E8A.16|haf-7	protein_coding	lifted_all.ident	chrV_pilon.g16614
WBGene00001818|Y57G11C.1|haf-8	protein_coding	lifted_all.ident	chrIV_pilon.g12513
WBGene00001819|ZK484.2|haf-9	protein_coding	lifted_all.ident	chrI_pilon.g1061
WBGene00001820|F53B2.6|ham-1	protein_coding	lifted_all.ident	chrIV_pilon.g12104
WBGene00001821|C07A12.1|ham-2	protein_coding	lifted_all.ident	chrX_pilon.g18934
WBGene00001823|ZC395.7|hap-1	protein_coding	lifted_all.ident
WBGene00001824|F13D11.2|hbl-1	protein_coding	lifted_all.ident	chrX_pilon.g19126
WBGene00001827|C46A5.9|hcf-1	protein_coding	lifted_all.ident	chrIV_pilon.g10914
WBGene00001828|F40E10.1|hch-1	protein_coding	lifted_all.ident	chrX_pilon.g20630
WBGene00001829|ZK1055.1|hcp-1	protein_coding	lifted_all.ident	chrV_pilon.g14474
WBGene00001830|T06E4.1|hcp-2	protein_coding	lifted_all.ident	chrV_pilon.g15300
WBGene00001831|F58A4.3|hcp-3	protein_coding	lifted_all.ident	chrIII_pilon.g8666
WBGene00001832|T03F1.9|hcp-4	protein_coding	lifted_all.ident	chrI_pilon.g593
WBGene00001833|Y110A7A.1|hcp-6	protein_coding	lifted_all.ident	chrI_pilon.g858
WBGene00001834|C53A5.3|hda-1	protein_coding	lifted_all.ident	chrV_pilon.g16553
WBGene00001835|C08B11.2|hda-2	protein_coding	lifted_all.ident	chrII_pilon.g5140
WBGene00001836|R06C1.1|hda-3	protein_coding	lifted_all.ident	chrI_pilon.g2369
WBGene00001837|C10E2.3|hda-4	protein_coding	lifted_all.ident	chrX_pilon.g20913
WBGene00001838|Y51H1A.5|hda-10	protein_coding	lifted_all.ident	chrII_pilon.g6442
WBGene00001839|ZK829.2|hdl-1	protein_coding	lifted_all.ident	chrIV_pilon.g11969
WBGene00001840|C26D10.2|hel-1	protein_coding	lifted_all.ident	chrII_pilon.g5219
WBGene00001841|C36B7.7|hen-1	protein_coding	lifted_all.ident	chrX_pilon.g19353
WBGene00001842|ZK287.8|her-1	protein_coding	lifted_all.ident	chrV_pilon.g15314
WBGene00001843|W06D4.1|hgo-1	protein_coding	lifted_all.ident	chrI_pilon.g1735
WBGene00001844|K02E10.2|hid-1	protein_coding	lifted_all.ident	chrX_pilon.g18627
WBGene00001851|F38A6.3|hif-1	protein_coding	lifted_all.ident	chrV_pilon.g18166
WBGene00001852|C30G7.1|hil-1	protein_coding	lifted_all.ident	chrV_pilon.g16651
WBGene00001853|Y73B6BL.9|hil-2	protein_coding	lifted_all.ident	chrIV_pilon.g10590
WBGene00001854|F22F1.1|hil-3	protein_coding	lifted_all.ident	chrX_pilon.g19525
WBGene00001855|C18G1.5|hil-4	protein_coding	lifted_all.ident	chrV_pilon.g14065
WBGene00001856|B0414.3|hil-5	protein_coding	lifted_all.ident	chrI_pilon.g992
WBGene00001857|F59A7.4|hil-6	protein_coding	lifted_all.ident	chrV_pilon.g13366
WBGene00001858|C01B10.5|hil-7	protein_coding	lifted_all.ident	chrIV_pilon.g10675
WBGene00001859|T05E8.2|hil-8	protein_coding	lifted_all.ident	chrI_pilon.g924
WBGene00001860|F28B3.7|him-1	protein_coding	lifted_all.ident	chrI_pilon.g806
WBGene00001862|ZK381.1|him-3	protein_coding	lifted_all.ident	chrIV_pilon.g10727
WBGene00001863|F15G9.4|him-4	protein_coding	lifted_all.ident	chrX_pilon.g19784
WBGene00001864|D1086.4|him-5	protein_coding	lifted_all.ident	chrV_pilon.g16429
WBGene00001865|T04A11.6|him-6	protein_coding	lifted_all.ident	chrIV_pilon.g12091
WBGene00001867|T07G12.12|him-8	protein_coding	lifted_all.ident	chrIV_pilon.g11622
WBGene00001869|R12B2.4|him-10	protein_coding	lifted_all.ident	chrIII_pilon.g7795
WBGene00001872|ZK1127.11|him-14	protein_coding	lifted_all.ident	chrII_pilon.g4925
WBGene00001874|T09E8.2|him-17	protein_coding	lifted_all.ident	chrV_pilon.g16185
WBGene00001875|T10C6.14|his-1	protein_coding	lifted_all.ident
WBGene00001876|T10C6.13|his-2	protein_coding	lifted_all.ident	chrV_pilon.g17018
WBGene00001877|T10C6.12|his-3	protein_coding	lifted_all.ident
WBGene00001878|T10C6.11|his-4	protein_coding	lifted_all.ident
WBGene00001879|F45F2.3|his-5	protein_coding	lifted_all.ident
WBGene00001880|F45F2.13|his-6	protein_coding	lifted_all.ident	chrV_pilon.g15010
WBGene00001881|F45F2.4|his-7	protein_coding	lifted_all.ident
WBGene00001882|F45F2.12|his-8	protein_coding	lifted_all.ident	chrV_pilon.g15008
WBGene00001883|ZK131.3|his-9	protein_coding	lifted_all.ident
WBGene00001884|ZK131.4|his-10	protein_coding	lifted_all.ident	chrII_pilon.g6427
WBGene00001885|ZK131.5|his-11	protein_coding	lifted_all.ident
WBGene00001886|ZK131.6|his-12	protein_coding	lifted_all.ident	chrII_pilon.g6425
WBGene00001887|ZK131.7|his-13	protein_coding	lifted_all.ident
WBGene00001888|ZK131.8|his-14	protein_coding	lifted_all.ident	chrII_pilon.g6423
WBGene00001889|ZK131.9|his-15	protein_coding	lifted_all.ident
WBGene00001890|ZK131.10|his-16	protein_coding	lifted_all.ident	chrII_pilon.g6421
WBGene00001891|K06C4.5|his-17	protein_coding	lifted_all.ident	chrV_pilon.g15106
WBGene00001892|K06C4.10|his-18	protein_coding	lifted_all.ident
WBGene00001893|K06C4.11|his-19	protein_coding	no.lift_good.trans
WBGene00001894|K06C4.4|his-20	protein_coding	no.lift_good.trans	chrV_pilon.g15104
WBGene00001895|K06C4.3|his-21	protein_coding	no.lift_good.trans	chrV_pilon.g15102
WBGene00001896|K06C4.12|his-22	protein_coding	no.lift_good.trans
WBGene00001898|M163.3|his-24	protein_coding	lifted_all.ident	chrX_pilon.g20593
WBGene00001899|ZK131.2|his-25	protein_coding	lifted_all.ident	chrII_pilon.g6429
WBGene00001900|ZK131.1|his-26	protein_coding	lifted_all.ident
WBGene00001901|K06C4.13|his-27	protein_coding	no.lift_good.trans
WBGene00001902|K06C4.2|his-28	protein_coding	no.lift_good.trans	chrV_pilon.g15100
WBGene00001903|F35H10.11|his-29	protein_coding	lifted_all.ident	chrIV_pilon.g11041
WBGene00001904|F35H10.1|his-30	protein_coding	lifted_all.ident
WBGene00001905|F17E9.12|his-31	protein_coding	lifted_all.ident	chrIV_pilon.g11044
WBGene00001906|F17E9.10|his-32	protein_coding	lifted_all.ident
WBGene00001907|F17E9.13|his-33	protein_coding	lifted_all.ident	chrIV_pilon.g11046
WBGene00001908|F17E9.9|his-34	protein_coding	lifted_all.ident
WBGene00001909|C50F4.13|his-35	protein_coding	lifted_all.ident	chrV_pilon.g15275
WBGene00001910|C50F4.6	protein_coding	lifted_all.ident	chrV_pilon.g15277
WBGene00001911|C50F4.7|his-37	protein_coding	lifted_all.ident	chrV_pilon.g15278
WBGene00001912|K03A1.6|his-38	protein_coding	lifted_all.ident	chrX_pilon.g19378
WBGene00001913|F45F2.2|his-39	protein_coding	lifted_all.ident
WBGene00001914|K03A1.1|his-40	protein_coding	lifted_all.ident
WBGene00001915|C50F4.5|his-41	protein_coding	lifted_all.ident	chrV_pilon.g15276
WBGene00001916|F08G2.3|his-42	protein_coding	lifted_all.ident	chrII_pilon.g6433
WBGene00001917|F08G2.2|his-43	protein_coding	lifted_all.ident
WBGene00001918|F08G2.1|his-44	protein_coding	lifted_all.ident	chrII_pilon.g6431
WBGene00001919|B0035.10|his-45	protein_coding	lifted_all.ident
WBGene00001920|B0035.9|his-46	protein_coding	lifted_all.ident	chrIV_pilon.g11829
WBGene00001921|B0035.7|his-47	protein_coding	lifted_all.ident	chrIV_pilon.g11827
WBGene00001922|B0035.8|his-48	protein_coding	lifted_all.ident
WBGene00001923|F07B7.5|his-49	protein_coding	lifted_all.ident
WBGene00001924|F07B7.9|his-50	protein_coding	lifted_all.ident
WBGene00001925|F07B7.10|his-51	protein_coding	lifted_all.ident
WBGene00001926|F07B7.4|his-52	protein_coding	lifted_all.ident
WBGene00001927|F07B7.3|his-53	protein_coding	lifted_all.ident
WBGene00001928|F07B7.11|his-54	protein_coding	lifted_all.ident
WBGene00001929|F54E12.1|his-55	protein_coding	lifted_all.ident	chrIV_pilon.g11834
WBGene00001930|F54E12.3|his-56	protein_coding	lifted_all.ident
WBGene00001931|F54E12.5|his-57	protein_coding	lifted_all.ident	chrIV_pilon.g11837
WBGene00001932|F54E12.4|his-58	protein_coding	lifted_all.ident	chrIV_pilon.g11836
WBGene00001933|F55G1.2|his-59	protein_coding	lifted_all.ident
WBGene00001934|F55G1.11|his-60	protein_coding	lifted_all.ident	chrIV_pilon.g10846
WBGene00001935|F55G1.10|his-61	protein_coding	lifted_all.ident	chrIV_pilon.g10844
WBGene00001936|F55G1.3|his-62	protein_coding	lifted_all.ident
WBGene00001937|F22B3.2|his-63	protein_coding	lifted_all.ident	chrIV_pilon.g11850
WBGene00001938|F22B3.1|his-64	protein_coding	lifted_all.ident
WBGene00001939|H02I12.7|his-65	protein_coding	lifted_all.ident
WBGene00001940|H02I12.6|his-66	protein_coding	lifted_all.ident	chrIV_pilon.g11846
WBGene00001941|T23D8.5|his-67	protein_coding	lifted_all.ident	chrI_pilon.g1947
WBGene00001942|T23D8.6|his-68	protein_coding	lifted_all.ident
WBGene00001943|E03A3.3|his-69	protein_coding	lifted_all.ident	chrIII_pilon.g7364
WBGene00001944|E03A3.4|his-70	protein_coding	lifted_all.ident	chrIII_pilon.g7365
WBGene00001945|F45E1.6|his-71	protein_coding	lifted_all.ident	chrX_pilon.g19495
WBGene00001946|Y49E10.6|his-72	protein_coding	lifted_all.ident	chrIII_pilon.g9176
WBGene00001947|W09H1.2|his-73	protein_coding	lifted_all.ident
WBGene00001948|B0304.1|hlh-1	protein_coding	lifted_all.ident	chrII_pilon.g4258
WBGene00001949|M05B5.5|hlh-2	protein_coding	lifted_all.ident	chrI_pilon.g1331
WBGene00001950|T24B8.6|hlh-3	protein_coding	lifted_all.ident	chrII_pilon.g5404
WBGene00001951|T05G5.2|hlh-4	protein_coding	lifted_all.ident	chrIII_pilon.g8688
WBGene00001952|T15H9.3|hlh-6	protein_coding	lifted_all.ident	chrII_pilon.g5545
WBGene00001953|C02B8.4|hlh-8	protein_coding	lifted_all.ident	chrX_pilon.g19517
WBGene00001954|ZK682.4|hlh-10	protein_coding	lifted_all.ident	chrV_pilon.g15212
WBGene00001955|F58A4.7|hlh-11	protein_coding	lifted_all.ident	chrIII_pilon.g8667
WBGene00001956|C28C12.8|hlh-12	protein_coding	lifted_all.ident	chrIV_pilon.g11090
WBGene00001957|F48D6.3|hlh-13	protein_coding	lifted_all.ident	chrX_pilon.g18881
WBGene00001958|C18A3.8|hlh-14	protein_coding	lifted_all.ident	chrII_pilon.g4597
WBGene00001959|C43H6.8|hlh-15	protein_coding	lifted_all.ident	chrX_pilon.g18615
WBGene00001960|DY3.3|hlh-16	protein_coding	lifted_all.ident	chrI_pilon.g1670
WBGene00001961|F38C2.2|hlh-17	protein_coding	lifted_all.ident	chrIV_pilon.g12706
WBGene00001962|F57C12.3|hlh-19	protein_coding	lifted_all.ident	chrX_pilon.g18296
WBGene00001964|C17C3.7|hlh-25	protein_coding	lifted_all.ident	chrII_pilon.g4531
WBGene00001965|C17C3.8|hlh-26	protein_coding	lifted_all.ident	chrII_pilon.g4530
WBGene00001966|C17C3.10|hlh-27	protein_coding	lifted_all.ident	chrII_pilon.g4534
WBGene00001967|F31A3.2|hlh-28	protein_coding	lifted_all.ident	chrX_pilon.g21049
WBGene00001968|F31A3.4|hlh-29	protein_coding	lifted_all.ident	chrX_pilon.g21048
WBGene00001971|Y48B6A.14|hmg-1.1	protein_coding	lifted_all.ident	chrII_pilon.g6505
WBGene00001972|F47D12.4|hmg-1.2	protein_coding	lifted_all.ident	chrIII_pilon.g7905
WBGene00001973|C32F10.5|hmg-3	protein_coding	lifted_all.ident	chrI_pilon.g1002
WBGene00001974|T20B12.8|hmg-4	protein_coding	lifted_all.ident	chrIII_pilon.g8155
WBGene00001975|F45E4.9|hmg-5	protein_coding	lifted_all.ident	chrIV_pilon.g10884
WBGene00001976|T05A7.4|hmg-11	protein_coding	lifted_all.ident	chrII_pilon.g4289
WBGene00001977|Y17G7A.1|hmg-12	protein_coding	lifted_all.ident	chrII_pilon.g6064
WBGene00001978|R13H4.4|hmp-1	protein_coding	lifted_all.ident	chrV_pilon.g15872
WBGene00001979|K05C4.6|hmp-2	protein_coding	lifted_all.ident	chrI_pilon.g2955
WBGene00001980|W02B9.1|hmr-1	protein_coding	lifted_all.ident	chrI_pilon.g2193
WBGene00001981|C44C10.8|hnd-1	protein_coding	lifted_all.ident	chrX_pilon.g20110
WBGene00001983|E04A4.4|hoe-1	protein_coding	lifted_all.ident	chrIV_pilon.g10261
WBGene00001984|W06B11.4|hog-1	protein_coding	lifted_all.ident	chrX_pilon.g19131
WBGene00001985|C18E3.8|hop-1	protein_coding	lifted_all.ident	chrI_pilon.g666
WBGene00001986|F43D2.4|hot-1	protein_coding	lifted_all.ident	chrV_pilon.g16572
WBGene00001987|Y39B6A.48|hot-2	protein_coding	lifted_all.ident	chrV_pilon.g17829
WBGene00001988|W02B8.5|hot-3	protein_coding	lifted_all.ident	chrII_pilon.g6448
WBGene00001989|T12A2.16|hot-4	protein_coding	lifted_all.ident	chrIII_pilon.g7884
WBGene00001990|K07A12.6|hot-5	protein_coding	lifted_all.ident	chrI_pilon.g1647
WBGene00001991|C13G3.2|hot-6	protein_coding	lifted_all.ident	chrV_pilon.g15663
WBGene00001992|Y48B6A.9|hot-7	protein_coding	lifted_all.ident	chrII_pilon.g6500
WBGene00001993|T21C12.2|hpd-1	protein_coding	lifted_all.ident	chrIII_pilon.g8888
WBGene00001994|F20B6.8|hpk-1	protein_coding	lifted_all.ident	chrX_pilon.g18877
WBGene00001995|K08H2.6|hpl-1	protein_coding	lifted_all.ident	chrX_pilon.g20373
WBGene00001996|K01G5.2|hpl-2	protein_coding	lifted_all.ident	chrIII_pilon.g8936
WBGene00001997|Y39A1A.23|hpr-9	protein_coding	lifted_all.ident	chrIII_pilon.g8907
WBGene00001998|F32A11.2|hpr-17	protein_coding	lifted_all.ident	chrII_pilon.g6328
WBGene00001999|F42A6.7|hrp-1	protein_coding	lifted_all.ident	chrIV_pilon.g9949
WBGene00002000|F58D5.1|hrp-2	protein_coding	lifted_all.ident	chrI_pilon.g2392
WBGene00002001|T11G6.1|hars-1	protein_coding	lifted_all.ident	chrIV_pilon.g11693
WBGene00002002|K08E7.2|hsb-1	protein_coding	lifted_all.ident	chrIV_pilon.g12110
WBGene00002003|B0285.5|hse-5	protein_coding	lifted_all.ident	chrIII_pilon.g7426
WBGene00002004|Y53C10A.12|hsf-1	protein_coding	lifted_all.ident	chrI_pilon.g2374
WBGene00002005|F26D10.3|hsp-1	protein_coding	lifted_all.ident	chrIV_pilon.g12865
WBGene00002007|C15H9.6|hsp-3	protein_coding	lifted_all.ident	chrX_pilon.g19168
WBGene00002008|F43E2.8|hsp-4	protein_coding	lifted_all.ident	chrII_pilon.g4999
WBGene00002010|C37H5.8|hsp-6	protein_coding	lifted_all.ident	chrV_pilon.g14084
WBGene00002011|C14B9.1|hsp-12.2	protein_coding	lifted_all.ident	chrIII_pilon.g8313
WBGene00002012|F38E11.1|hsp-12.3	protein_coding	lifted_all.ident	chrIV_pilon.g11317
WBGene00002013|F38E11.2|hsp-12.6	protein_coding	lifted_all.ident	chrIV_pilon.g11318
WBGene00002015|T27E4.8|hsp-16.1	protein_coding	lifted_all.ident	chrV_pilon.g15161
WBGene00002016|Y46H3A.3|hsp-16.2	protein_coding	lifted_all.ident	chrV_pilon.g13309
WBGene00002017|T27E4.2|hsp-16.11	protein_coding	lifted_all.ident	chrV_pilon.g15164
WBGene00002018|Y46H3A.2|hsp-16.41	protein_coding	lifted_all.ident	chrV_pilon.g13310
WBGene00002019|T27E4.3|hsp-16.48	protein_coding	lifted_all.ident	chrV_pilon.g15162
WBGene00002020|T27E4.9|hsp-16.49	protein_coding	lifted_all.ident	chrV_pilon.g15163
WBGene00002021|F52E1.7|hsp-17	protein_coding	lifted_all.ident	chrV_pilon.g14976
WBGene00002023|C09B8.6|hsp-25	protein_coding	lifted_all.ident	chrX_pilon.g19158
WBGene00002024|C14F11.5|hsp-43	protein_coding	lifted_all.ident	chrX_pilon.g19198
WBGene00002025|Y22D7AL.5|hsp-60	protein_coding	lifted_all.ident	chrIII_pilon.g6984
WBGene00002026|C12C8.1|hsp-70	protein_coding	lifted_all.ident	chrI_pilon.g1781
WBGene00002027|T05F1.6|hsr-9	protein_coding	lifted_all.ident	chrI_pilon.g1863
WBGene00002028|F08B4.6|hst-1	protein_coding	lifted_all.ident	chrIV_pilon.g11135
WBGene00002029|C34F6.4|hst-2	protein_coding	lifted_all.ident	chrX_pilon.g20025
WBGene00002030|F40H3.5|hst-3.1	protein_coding	lifted_all.ident	chrII_pilon.g4696
WBGene00002031|Y34B4A.3|hst-6	protein_coding	lifted_all.ident	chrX_pilon.g19049
WBGene00002032|F41H10.10|htp-1	protein_coding	lifted_all.ident	chrIV_pilon.g10434
WBGene00002033|Y73B6BL.2|htp-2	protein_coding	lifted_all.ident	chrIV_pilon.g10621
WBGene00002034|F57C9.5|htp-3	protein_coding	lifted_all.ident	chrI_pilon.g785
WBGene00002035|F29D10.4|hum-1	protein_coding	lifted_all.ident	chrI_pilon.g1691
WBGene00002036|F36D4.3|hum-2	protein_coding	lifted_all.ident	chrV_pilon.g15245
WBGene00002037|F46C3.3|hum-4	protein_coding	lifted_all.ident	chrX_pilon.g20070
WBGene00002038|T02C12.1|hum-5	protein_coding	lifted_all.ident	chrIII_pilon.g7360
WBGene00002039|T10H10.1|hum-6	protein_coding	lifted_all.ident	chrX_pilon.g18596
WBGene00002040|F56A6.2|hum-7	protein_coding	lifted_all.ident	chrI_pilon.g94
WBGene00002041|Y66H1A.6|hum-8	protein_coding	lifted_all.ident	chrIV_pilon.g9509
WBGene00002042|H26D21.1|hus-1	protein_coding	lifted_all.ident	chrI_pilon.g556
WBGene00002043|C09G4.1|hyl-1	protein_coding	lifted_all.ident	chrIV_pilon.g11102
WBGene00002044|K02G10.6|hyl-2	protein_coding	lifted_all.ident	chrX_pilon.g18955
WBGene00002045|C56C10.8|icd-1	protein_coding	lifted_all.ident	chrII_pilon.g4806
WBGene00002046|C01F6.8|icln-1	protein_coding	lifted_all.ident	chrIV_pilon.g11233
WBGene00002047|Y39G10AR.13|icp-1	protein_coding	lifted_all.ident	chrI_pilon.g314
WBGene00002048|B0244.2|ida-1	protein_coding	lifted_all.ident	chrIII_pilon.g7788
WBGene00002050|F38B2.1|ifa-1	protein_coding	lifted_all.ident	chrX_pilon.g20036
WBGene00002051|F52E10.5|ifa-3	protein_coding	lifted_all.ident	chrX_pilon.g20865
WBGene00002052|K05B2.3|ifa-4	protein_coding	lifted_all.ident	chrX_pilon.g18984
WBGene00002053|F10C1.2|ifb-1	protein_coding	lifted_all.ident	chrII_pilon.g4602
WBGene00002054|F10C1.7|ifb-2	protein_coding	lifted_all.ident	chrII_pilon.g4599
WBGene00002055|F37B4.2|ifc-1	protein_coding	lifted_all.ident	chrV_pilon.g13578
WBGene00002056|M6.1|ifc-2	protein_coding	lifted_all.ident	chrX_pilon.g18308
WBGene00002057|R04E5.10|ifd-1	protein_coding	lifted_all.ident	chrX_pilon.g19647
WBGene00002058|F25E2.4|ifd-2	protein_coding	lifted_all.ident	chrX_pilon.g18332
WBGene00002059|F53A2.6|ife-1	protein_coding	lifted_all.ident	chrIII_pilon.g9326
WBGene00002060|R04A9.4|ife-2	protein_coding	lifted_all.ident	chrX_pilon.g18264
WBGene00002061|B0348.6|ife-3	protein_coding	lifted_all.ident	chrV_pilon.g12925
WBGene00002062|C05D9.5|ife-4	protein_coding	lifted_all.ident	chrX_pilon.g18383
WBGene00002063|Y57A10A.30|ife-5	protein_coding	lifted_all.ident	chrII_pilon.g6129
WBGene00002064|T05G5.10|iff-1	protein_coding	lifted_all.ident	chrIII_pilon.g8690
WBGene00002065|F54C9.1|iff-2	protein_coding	lifted_all.ident	chrII_pilon.g5281
WBGene00002066|M110.4|ifg-1	protein_coding	lifted_all.ident	chrII_pilon.g5192
WBGene00002067|C43C3.1|ifp-1	protein_coding	lifted_all.ident	chrX_pilon.g19778
WBGene00002068|C27A2.3|ify-1	protein_coding	lifted_all.ident	chrII_pilon.g4401
WBGene00002069|C04F12.3|ikb-1	protein_coding	lifted_all.ident	chrI_pilon.g1882
WBGene00002070|K07A1.8|ile-1	protein_coding	lifted_all.ident	chrI_pilon.g1856
WBGene00002071|T04G9.3|ile-2	protein_coding	lifted_all.ident	chrX_pilon.g18323
WBGene00002072|T19B10.7|ima-1	protein_coding	lifted_all.ident	chrV_pilon.g15720
WBGene00002073|F26B1.3|ima-2	protein_coding	lifted_all.ident	chrI_pilon.g1128
WBGene00002074|F32E10.4|ima-3	protein_coding	lifted_all.ident	chrIV_pilon.g10868
WBGene00002075|F28B3.8|imb-1	protein_coding	lifted_all.ident	chrI_pilon.g800
WBGene00002076|R06A4.4|imb-2	protein_coding	lifted_all.ident	chrII_pilon.g6526
WBGene00002077|C53D5.6|imb-3	protein_coding	lifted_all.ident	chrI_pilon.g53
WBGene00002078|ZK742.1|xpo-1	protein_coding	lifted_all.ident	chrV_pilon.g14823; chrV_pilon.g14826
WBGene00002079|Y48G1A.5|xpo-2	protein_coding	lifted_all.ident	chrI_pilon.g54
WBGene00002080|C49H3.10|xpo-3	protein_coding	lifted_all.ident	chrIV_pilon.g10953
WBGene00002081|F54G8.3|ina-1	protein_coding	lifted_all.ident	chrIII_pilon.g8562
WBGene00002083|F57B9.6|inf-1	protein_coding	lifted_all.ident	chrIII_pilon.g8032
WBGene00002084|F13B12.5|ins-1	protein_coding	lifted_all.ident	chrIV_pilon.g11595
WBGene00002085|ZK75.2|ins-2	protein_coding	lifted_all.ident	chrII_pilon.g4657
WBGene00002086|ZK75.3|ins-3	protein_coding	lifted_all.ident	chrII_pilon.g4658
WBGene00002087|ZK75.1|ins-4	protein_coding	lifted_all.ident	chrII_pilon.g4659
WBGene00002088|ZK84.3|ins-5	protein_coding	lifted_all.ident	chrII_pilon.g4660
WBGene00002089|ZK84.6|ins-6	protein_coding	lifted_all.ident	chrII_pilon.g4661
WBGene00002090|ZK1251.2|ins-7	protein_coding	lifted_all.ident	chrIV_pilon.g11377
WBGene00002091|ZK1251.11|ins-8	protein_coding	lifted_all.ident	chrIV_pilon.g11376
WBGene00002092|C06E2.8|ins-9	protein_coding	lifted_all.ident	chrX_pilon.g19657
WBGene00002093|T08G5.12|ins-10	protein_coding	lifted_all.ident	chrV_pilon.g16411
WBGene00002094|C17C3.4|ins-11	protein_coding	lifted_all.ident	chrII_pilon.g4541
WBGene00002095|C17C3.19|ins-12	protein_coding	lifted_all.ident	chrII_pilon.g4540
WBGene00002096|C17C3.18|ins-13	protein_coding	lifted_all.ident	chrII_pilon.g4536
WBGene00002097|F41G3.16|ins-14	protein_coding	lifted_all.ident	chrII_pilon.g4848
WBGene00002098|F41G3.17|ins-15	protein_coding	lifted_all.ident	chrII_pilon.g4847
WBGene00002099|Y39A3A.5|ins-16	protein_coding	lifted_all.ident	chrIII_pilon.g7044
WBGene00002100|F56F3.6|ins-17	protein_coding	lifted_all.ident	chrIII_pilon.g7462
WBGene00002101|T28B8.2|ins-18	protein_coding	lifted_all.ident	chrI_pilon.g1527
WBGene00002102|T10D4.13|ins-19	protein_coding	lifted_all.ident	chrII_pilon.g3868
WBGene00002103|ZK84.7|ins-20	protein_coding	lifted_all.ident	chrII_pilon.g4663
WBGene00002104|M04D8.1|ins-21	protein_coding	lifted_all.ident	chrIII_pilon.g8769
WBGene00002105|M04D8.2|ins-22	protein_coding	lifted_all.ident	chrIII_pilon.g8770
WBGene00002106|M04D8.3|ins-23	protein_coding	lifted_all.ident	chrIII_pilon.g8771
WBGene00002107|ZC334.3|ins-24	protein_coding	lifted_all.ident	chrI_pilon.g2835
WBGene00002108|ZC334.8|ins-25	protein_coding	lifted_all.ident	chrI_pilon.g2832
WBGene00002109|ZC334.1|ins-26	protein_coding	lifted_all.ident	chrI_pilon.g2837
WBGene00002110|ZC334.11|ins-27	protein_coding	lifted_all.ident	chrI_pilon.g2834
WBGene00002111|ZC334.9|ins-28	protein_coding	lifted_all.ident	chrI_pilon.g2829
WBGene00002112|ZC334.10|ins-29	protein_coding	lifted_all.ident	chrI_pilon.g2831
WBGene00002113|ZC334.2|ins-30	protein_coding	lifted_all.ident	chrI_pilon.g2836
WBGene00002114|T10D4.4|ins-31	protein_coding	lifted_all.ident	chrII_pilon.g3869
WBGene00002115|Y8A9A.6|ins-32	protein_coding	lifted_all.ident	chrII_pilon.g4113
WBGene00002116|W09C5.4|ins-33	protein_coding	lifted_all.ident	chrI_pilon.g2765
WBGene00002117|F52B11.6|ins-34	protein_coding	lifted_all.ident	chrIV_pilon.g12424
WBGene00002118|K02E2.4|ins-35	protein_coding	lifted_all.ident	chrV_pilon.g18071
WBGene00002119|Y53H1A.4|ins-36	protein_coding	lifted_all.ident	chrI_pilon.g2211
WBGene00002120|F08G2.6|ins-37	protein_coding	lifted_all.ident	chrII_pilon.g6436
WBGene00002121|C17C3.20|ins-38	protein_coding	lifted_all.ident
WBGene00002123|C16E9.4|inx-1	protein_coding	lifted_all.ident	chrX_pilon.g19331
WBGene00002124|F08G12.10|inx-2	protein_coding	lifted_all.ident	chrX_pilon.g20043
WBGene00002125|F22F4.2|inx-3	protein_coding	lifted_all.ident	chrX_pilon.g19150
WBGene00002127|R09F10.4|inx-5	protein_coding	lifted_all.ident	chrX_pilon.g19552
WBGene00002128|C36H8.2|inx-6	protein_coding	lifted_all.ident	chrIV_pilon.g12138
WBGene00002129|K02B2.4|inx-7	protein_coding	lifted_all.ident	chrIV_pilon.g10532
WBGene00002130|ZK792.2|inx-8	protein_coding	lifted_all.ident	chrIV_pilon.g11909
WBGene00002131|ZK792.3|inx-9	protein_coding	lifted_all.ident	chrIV_pilon.g11910
WBGene00002132|T18H9.5|inx-10	protein_coding	lifted_all.ident	chrV_pilon.g15199
WBGene00002133|W04D2.3|inx-11	protein_coding	lifted_all.ident	chrV_pilon.g16026
WBGene00002134|ZK770.3|inx-12	protein_coding	lifted_all.ident	chrI_pilon.g567
WBGene00002135|Y8G1A.2|inx-13	protein_coding	lifted_all.ident	chrI_pilon.g566
WBGene00002136|F07A5.1|inx-14	protein_coding	lifted_all.ident	chrI_pilon.g1373
WBGene00002137|R12E2.9|inx-15	protein_coding	lifted_all.ident	chrI_pilon.g652
WBGene00002138|R12E2.5|inx-16	protein_coding	lifted_all.ident	chrI_pilon.g653
WBGene00002139|R12E2.4|inx-17	protein_coding	lifted_all.ident	chrI_pilon.g654
WBGene00002140|C18H7.2|inx-18	protein_coding	lifted_all.ident	chrIV_pilon.g9537
WBGene00002141|T16H5.1|inx-19	protein_coding	lifted_all.ident	chrI_pilon.g341
WBGene00002142|T23H4.1|inx-20	protein_coding	lifted_all.ident	chrI_pilon.g1921
WBGene00002143|Y47G6A.1|inx-21	protein_coding	lifted_all.ident	chrI_pilon.g539
WBGene00002144|Y47G6A.2|inx-22	protein_coding	lifted_all.ident	chrI_pilon.g538
WBGene00002146|C09B8.1|ipp-5	protein_coding	lifted_all.ident	chrX_pilon.g19157
WBGene00002147|C41C4.4|ire-1	protein_coding	lifted_all.ident	chrII_pilon.g5162
WBGene00002148|F44C4.4|gon-14	protein_coding	lifted_all.ident	chrV_pilon.g14477
WBGene00002149|R03E9.4|irk-1	protein_coding	lifted_all.ident	chrX_pilon.g19297
WBGene00002150|M02A10.2|irk-2	protein_coding	lifted_all.ident	chrX_pilon.g18317
WBGene00002151|K04G11.5|irk-3	protein_coding	lifted_all.ident	chrX_pilon.g20567
WBGene00002152|R11A8.6|iars-1	protein_coding	lifted_all.ident	chrIV_pilon.g11581
WBGene00002153|C25A1.7|iars-2	protein_coding	lifted_all.ident	chrI_pilon.g1987
WBGene00002162|F42G8.12|isp-1	protein_coding	lifted_all.ident	chrIV_pilon.g10999
WBGene00002163|C54D1.3|ist-1	protein_coding	lifted_all.ident	chrX_pilon.g19354
WBGene00002169|F37A4.8|isw-1	protein_coding	lifted_all.ident	chrIII_pilon.g7988
WBGene00002173|F33D4.2|itr-1	protein_coding	lifted_all.ident	chrIV_pilon.g10889
WBGene00002174|W03D8.6|itx-1	protein_coding	lifted_all.ident	chrI_pilon.g399
WBGene00002175|Y105C5B.21|jac-1	protein_coding	lifted_all.ident	chrIV_pilon.g12683; chrIV_pilon.g12685
WBGene00002176|F56D12.4|jip-1	protein_coding	lifted_all.ident	chrII_pilon.g3331
WBGene00002177|F35C8.3|jkk-1	protein_coding	lifted_all.ident	chrX_pilon.g19065
WBGene00002178|B0478.1|jnk-1	protein_coding	lifted_all.ident	chrIV_pilon.g10721
WBGene00002179|T22C1.7|jph-1	protein_coding	lifted_all.ident	chrI_pilon.g1487
WBGene00002180|Y77E11A.4|jtr-1	protein_coding	lifted_all.ident	chrIV_pilon.g9672
WBGene00002181|K03D10.1|kal-1	protein_coding	lifted_all.ident	chrI_pilon.g2859
WBGene00002182|F08F8.3|kap-1	protein_coding	lifted_all.ident	chrIII_pilon.g8143
WBGene00002183|T02G5.8|kat-1	protein_coding	lifted_all.ident	chrII_pilon.g4928
WBGene00002184|C47D12.7|kel-1	protein_coding	lifted_all.ident	chrII_pilon.g6009; chrII_pilon.g6011
WBGene00002185|T27E9.4|kel-3	protein_coding	lifted_all.ident	chrIII_pilon.g9365
WBGene00002186|T16H12.6|kel-10	protein_coding	lifted_all.ident	chrIII_pilon.g8796; chrIII_pilon.g8797
WBGene00002187|T07A9.3|kgb-1	protein_coding	lifted_all.ident	chrIV_pilon.g9503
WBGene00002188|ZC416.4|kgb-2	protein_coding	lifted_all.ident	chrIV_pilon.g10009
WBGene00002189|ZK909.2|kin-1	protein_coding	lifted_all.ident	chrI_pilon.g2990; chrI_pilon.g2991
WBGene00002190|R07E4.6|kin-2	protein_coding	lifted_all.ident	chrX_pilon.g19147
WBGene00002191|B0205.7|kin-3	protein_coding	lifted_all.ident	chrI_pilon.g2127
WBGene00002192|C10C6.1|kin-4	protein_coding	lifted_all.ident	chrIV_pilon.g11857
WBGene00002193|T13H10.1|kin-5	protein_coding	lifted_all.ident	chrIV_pilon.g11457
WBGene00002194|ZK20.2|kin-6	protein_coding	lifted_all.ident	chrII_pilon.g5998
WBGene00002195|F08F1.1|kin-9	protein_coding	lifted_all.ident	chrX_pilon.g19579
WBGene00002196|T01G9.6|kin-10	protein_coding	lifted_all.ident	chrI_pilon.g1554
WBGene00002198|F22D6.1|kin-14	protein_coding	lifted_all.ident	chrI_pilon.g1302
WBGene00002199|M176.6|kin-15	protein_coding	lifted_all.ident	chrII_pilon.g5489
WBGene00002200|M176.7|kin-16	protein_coding	lifted_all.ident	chrII_pilon.g5490
WBGene00002201|T17E9.1|kin-18	protein_coding	lifted_all.ident	chrIII_pilon.g7857
WBGene00002202|C03C10.1|kin-19	protein_coding	lifted_all.ident	chrIII_pilon.g7368
WBGene00002203|F46F2.2|kin-20	protein_coding	lifted_all.ident	chrX_pilon.g20730
WBGene00002204|W08D2.8|kin-21	protein_coding	lifted_all.ident	chrIV_pilon.g11421
WBGene00002205|W04G5.6|kin-23	protein_coding	lifted_all.ident	chrI_pilon.g2316
WBGene00002206|K07F5.4|kin-24	protein_coding	lifted_all.ident	chrIV_pilon.g11424
WBGene00002207|B0302.1|sid-3	protein_coding	lifted_all.ident	chrX_pilon.g20986
WBGene00002208|T06C10.6|kin-26	protein_coding	lifted_all.ident	chrIV_pilon.g10944
WBGene00002210|F58H12.1|kin-29	protein_coding	lifted_all.ident	chrX_pilon.g18665
WBGene00002211|M01B2.1|kin-30	protein_coding	lifted_all.ident	chrV_pilon.g16752
WBGene00002213|C30F8.4|kin-32	protein_coding	lifted_all.ident
WBGene00002214|M7.2|klc-1	protein_coding	lifted_all.ident	chrIV_pilon.g11762
WBGene00002215|C18C4.10|klc-2	protein_coding	lifted_all.ident	chrV_pilon.g14268
WBGene00002216|T09A5.2|klp-3	protein_coding	lifted_all.ident	chrII_pilon.g5108
WBGene00002217|F56E3.3|klp-4	protein_coding	lifted_all.ident	chrX_pilon.g18716
WBGene00002218|R144.1|klp-6	protein_coding	lifted_all.ident	chrIII_pilon.g7621
WBGene00002219|K11D9.1|klp-7	protein_coding	lifted_all.ident	chrIII_pilon.g8944
WBGene00002220|C15C7.2|gcc-1	protein_coding	lifted_all.ident	chrX_pilon.g18712
WBGene00002222|F20C5.2|klp-11	protein_coding	lifted_all.ident	chrIV_pilon.g11154
WBGene00002223|T01G1.1|klp-12	protein_coding	lifted_all.ident	chrIV_pilon.g11838
WBGene00002224|F22F4.3|klp-13	protein_coding	lifted_all.ident	chrX_pilon.g19148
WBGene00002225|M01E11.6|klp-15	protein_coding	lifted_all.ident	chrI_pilon.g952
WBGene00002226|C41G7.2|klp-16	protein_coding	lifted_all.ident	chrI_pilon.g1827
WBGene00002227|W02B12.7|klp-17	protein_coding	lifted_all.ident	chrII_pilon.g5950
WBGene00002228|C06G3.2|klp-18	protein_coding	lifted_all.ident	chrIV_pilon.g10739
WBGene00002229|Y43F4B.6|klp-19	protein_coding	lifted_all.ident	chrIII_pilon.g9316
WBGene00002230|Y50D7A.6|klp-20	protein_coding	lifted_all.ident	chrIII_pilon.g6735
WBGene00002231|C02F5.1|knl-1	protein_coding	lifted_all.ident	chrIII_pilon.g8345
WBGene00002232|F11A6.1|kpc-1	protein_coding	lifted_all.ident	chrI_pilon.g2322
WBGene00002233|C25B8.1|kqt-1	protein_coding	lifted_all.ident	chrX_pilon.g19273
WBGene00002234|M60.5|kqt-2	protein_coding	lifted_all.ident	chrX_pilon.g19542
WBGene00002235|Y54G9A.3|kqt-3	protein_coding	lifted_all.ident	chrII_pilon.g6405
WBGene00002238|T02G5.9|kars-1	protein_coding	lifted_all.ident	chrII_pilon.g4927
WBGene00002239|F13B9.5|ksr-1	protein_coding	lifted_all.ident	chrX_pilon.g19547
WBGene00002240|F58D5.4|ksr-2	protein_coding	lifted_all.ident	chrI_pilon.g2391
WBGene00002241|F10C2.2|kup-1	protein_coding	lifted_all.ident	chrV_pilon.g15905
WBGene00002242|C53C9.3|kvs-1	protein_coding	lifted_all.ident	chrX_pilon.g19452
WBGene00002243|Y54G2A.25|lad-2	protein_coding	lifted_all.ident	chrIV_pilon.g9896
WBGene00002244|Y71H2AM.19|laf-1	protein_coding	lifted_all.ident	chrIII_pilon.g7156
WBGene00002245|K08B4.1|lag-1	protein_coding	lifted_all.ident	chrIV_pilon.g10551; chrIV_pilon.g10552
WBGene00002246|Y73C8B.4|lag-2	protein_coding	lifted_all.ident	chrV_pilon.g13668
WBGene00002247|W03F8.5|lam-1	protein_coding	lifted_all.ident	chrIV_pilon.g10367
WBGene00002248|T22A3.8|lam-3	protein_coding	lifted_all.ident	chrI_pilon.g2089
WBGene00002249|ZK353.6|lap-1	protein_coding	lifted_all.ident	chrIII_pilon.g8395
WBGene00002250|W07G4.4|lap-2	protein_coding	lifted_all.ident	chrV_pilon.g16166
WBGene00002251|B0457.1|lat-1	protein_coding	lifted_all.ident	chrII_pilon.g5366
WBGene00002252|B0286.2|lat-2	protein_coding	lifted_all.ident	chrII_pilon.g4231
WBGene00002253|F40F4.3|lbp-1	protein_coding	lifted_all.ident	chrX_pilon.g18726
WBGene00002254|F40F4.2|lbp-2	protein_coding	lifted_all.ident	chrX_pilon.g18727
WBGene00002255|F40F4.4|lbp-3	protein_coding	lifted_all.ident	chrX_pilon.g18725
WBGene00002256|ZK742.5|lbp-4	protein_coding	lifted_all.ident	chrV_pilon.g14827
WBGene00002257|W02D3.7|lbp-5	protein_coding	lifted_all.ident	chrI_pilon.g1228
WBGene00002258|W02D3.5|lbp-6	protein_coding	lifted_all.ident	chrI_pilon.g1226
WBGene00002259|T22G5.2|lbp-7	protein_coding	lifted_all.ident	chrV_pilon.g16354
WBGene00002260|T22G5.6|lbp-8	protein_coding	lifted_all.ident	chrV_pilon.g16358
WBGene00002261|F58A3.1|ldb-1	protein_coding	lifted_all.ident	chrX_pilon.g19994
WBGene00002262|F13D12.2|ldh-1	protein_coding	lifted_all.ident	chrII_pilon.g6020
WBGene00002263|K08H10.1|lea-1	protein_coding	lifted_all.ident	chrV_pilon.g15398
WBGene00002264|W09H1.6|lec-1	protein_coding	lifted_all.ident	chrII_pilon.g6336
WBGene00002265|F52H3.7|lec-2	protein_coding	lifted_all.ident	chrII_pilon.g5647
WBGene00002266|ZK892.1|lec-3	protein_coding	lifted_all.ident	chrII_pilon.g5642
WBGene00002267|C44F1.3|lec-4	protein_coding	lifted_all.ident	chrIII_pilon.g7315
WBGene00002268|ZK1248.16|lec-5	protein_coding	lifted_all.ident	chrII_pilon.g4629
WBGene00002269|Y55B1AR.1|lec-6	protein_coding	lifted_all.ident	chrIII_pilon.g6777
WBGene00002270|R07B1.2|lec-7	protein_coding	lifted_all.ident	chrX_pilon.g19799
WBGene00002271|R07B1.10|lec-8	protein_coding	lifted_all.ident	chrX_pilon.g19798
WBGene00002272|C16H3.2|lec-9	protein_coding	lifted_all.ident	chrX_pilon.g21054
WBGene00002273|W01A11.4|lec-10	protein_coding	lifted_all.ident	chrV_pilon.g14443
WBGene00002274|F38A5.3|lec-11	protein_coding	lifted_all.ident	chrIV_pilon.g10652
WBGene00002275|W01G7.5|lem-2	protein_coding	lifted_all.ident	chrII_pilon.g6477
WBGene00002276|F42H11.2|lem-3	protein_coding	lifted_all.ident	chrI_pilon.g1843
WBGene00002278|Y55F3AM.6|lep-2	protein_coding	lifted_all.ident	chrIV_pilon.g9603
WBGene00002280|F01G12.5|let-2	protein_coding	lifted_all.ident	chrX_pilon.g20877
WBGene00002282|C44H4.2|let-4	protein_coding	lifted_all.ident	chrX_pilon.g20615
WBGene00002295|K08F8.6|let-19	protein_coding	lifted_all.ident	chrII_pilon.g5339
WBGene00002297|T19E10.1|ect-2	protein_coding	lifted_all.ident	chrII_pilon.g5805
WBGene00002299|ZK1067.1|let-23	protein_coding	lifted_all.ident	chrII_pilon.g5432
WBGene00002324|Y54E5B.3|let-49	protein_coding	lifted_all.ident	chrI_pilon.g2973
WBGene00002335|ZK792.6|let-60	protein_coding	lifted_all.ident	chrIV_pilon.g11913
WBGene00002344|M7.1|let-70	protein_coding	lifted_all.ident	chrIV_pilon.g11761
WBGene00002348|R06C7.10|myo-1	protein_coding	lifted_all.ident	chrI_pilon.g1349
WBGene00002363|F38H4.9|let-92	protein_coding	lifted_all.ident	chrIV_pilon.g11950
WBGene00002368|K08E7.3|let-99	protein_coding	lifted_all.ident	chrIV_pilon.g12111
WBGene00002393|Y65B4BR.2|lpr-1	protein_coding	lifted_all.ident	chrI_pilon.g88
WBGene00002497|F52H3.1|let-268	protein_coding	lifted_all.ident	chrII_pilon.g5651
WBGene00002583|B0261.2|let-363	protein_coding	lifted_all.ident	chrI_pilon.g871
WBGene00002601|F26B1.7|let-381	protein_coding	lifted_all.ident	chrI_pilon.g1130
WBGene00002632|F26D11.11|let-413	protein_coding	lifted_all.ident	chrV_pilon.g14866
WBGene00002637|F26F12.7|let-418	protein_coding	lifted_all.ident	chrV_pilon.g14321
WBGene00002694|C10H11.9|let-502	protein_coding	lifted_all.ident	chrI_pilon.g770
WBGene00002696|E01A2.4|let-504	protein_coding	lifted_all.ident	chrI_pilon.g639
WBGene00002717|C01G8.9|let-526	protein_coding	lifted_all.ident	chrI_pilon.g883
WBGene00002783|F57B10.1|let-607	protein_coding	lifted_all.ident	chrI_pilon.g1197
WBGene00002804|Y110A7A.19|let-630	protein_coding	lifted_all.ident	chrI_pilon.g857
WBGene00002827|C29E6.1|let-653	protein_coding	lifted_all.ident	chrIV_pilon.g11957
WBGene00002845|F57B9.2|let-711	protein_coding	lifted_all.ident	chrIII_pilon.g8038
WBGene00002850|C16A3.3|let-716	protein_coding	lifted_all.ident	chrIII_pilon.g7927
WBGene00002855|C05D11.12|let-721	protein_coding	lifted_all.ident	chrIII_pilon.g7942
WBGene00002879|C29E4.8|let-754	protein_coding	lifted_all.ident	chrIII_pilon.g8265
WBGene00002881|C05D11.4|let-756	protein_coding	lifted_all.ident	chrIII_pilon.g7931
WBGene00002889|F20H11.2|let-765	protein_coding	lifted_all.ident	chrIII_pilon.g7977
WBGene00002891|C56G2.6|let-767	protein_coding	lifted_all.ident	chrIII_pilon.g7914
WBGene00002915|H19M22.2|let-805	protein_coding	lifted_all.ident	chrIII_pilon.g7142
WBGene00002957|F33A8.1|let-858	protein_coding	lifted_no.ident	chrII_pilon.g5858; chrII_pilon.g5860
WBGene00002974|F09E8.7|lev-1	protein_coding	lifted_all.ident	chrIV_pilon.g12237
WBGene00002975|C35C5.5|lev-8	protein_coding	lifted_all.ident	chrX_pilon.g20089
WBGene00002976|T07H6.5|lev-9	protein_coding	lifted_all.ident
WBGene00002977|Y105E8A.7|lev-10	protein_coding	lifted_all.ident	chrI_pilon.g2908
WBGene00002978|Y105E8B.1|lev-11	protein_coding	lifted_all.ident	chrI_pilon.g2929; chrI_pilon.g2930; chrI_pilon.g2931
WBGene00002979|C46H11.4|lfe-2	protein_coding	lifted_all.ident	chrI_pilon.g826
WBGene00002980|C32D5.9|lgg-1	protein_coding	lifted_all.ident	chrII_pilon.g4744
WBGene00002981|ZK593.6|lgg-2	protein_coding	lifted_all.ident	chrIV_pilon.g11720
WBGene00002982|B0336.8|lgg-3	protein_coding	lifted_all.ident	chrIII_pilon.g7769
WBGene00002983|C54G7.3|lgx-1	protein_coding	lifted_all.ident	chrX_pilon.g19087
WBGene00002985|C29A12.3|lig-1	protein_coding	lifted_all.ident	chrV_pilon.g15614
WBGene00002986|C07H6.1|lig-4	protein_coding	lifted_all.ident	chrIII_pilon.g8178
WBGene00002987|ZC64.4|lim-4	protein_coding	lifted_all.ident	chrX_pilon.g18830
WBGene00002988|K03E6.1|lim-6	protein_coding	lifted_all.ident	chrX_pilon.g18378
WBGene00002989|C04F1.3|lim-7	protein_coding	lifted_all.ident	chrI_pilon.g981
WBGene00002990|C37F5.1|lin-1	protein_coding	lifted_all.ident	chrIV_pilon.g9788
WBGene00002991|F17E5.1|lin-2	protein_coding	lifted_all.ident	chrX_pilon.g20261
WBGene00002992|F36H1.4|lin-3	protein_coding	lifted_all.ident	chrIV_pilon.g11753
WBGene00002994|T09A5.10|lin-5	protein_coding	lifted_all.ident	chrII_pilon.g5117
WBGene00002996|Y54G11A.10|lin-7	protein_coding	lifted_all.ident	chrII_pilon.g6520
WBGene00002997|B0454.1|lin-8	protein_coding	lifted_all.ident	chrII_pilon.g3850
WBGene00002998|ZK637.7|lin-9	protein_coding	lifted_all.ident	chrIII_pilon.g8499
WBGene00002999|C09H6.2|lin-10	protein_coding	lifted_all.ident	chrI_pilon.g1523
WBGene00003000|ZC247.3|lin-11	protein_coding	lifted_all.ident	chrI_pilon.g2003
WBGene00003001|R107.8|lin-12	protein_coding	lifted_all.ident	chrIII_pilon.g8537
WBGene00003002|C03B8.4|lin-13	protein_coding	lifted_all.ident	chrIII_pilon.g8212
WBGene00003003|T25C12.1|lin-14	protein_coding	lifted_all.ident	chrX_pilon.g20075
WBGene00003006|Y71F9B.5|lin-17	protein_coding	lifted_all.ident	chrI_pilon.g380
WBGene00003007|C16B8.1|lin-18	protein_coding	lifted_all.ident	chrX_pilon.g18844
WBGene00003008|Y54G2A.1|lin-22	protein_coding	lifted_all.ident	chrIV_pilon.g9902
WBGene00003009|K10B2.1|lin-23	protein_coding	lifted_all.ident	chrII_pilon.g4752
WBGene00003010|B0001.1|lin-24	protein_coding	lifted_all.ident	chrIV_pilon.g12008
WBGene00003011|F56H9.5|lin-25	protein_coding	lifted_all.ident	chrV_pilon.g16064
WBGene00003012|F18A1.2|lin-26	protein_coding	lifted_all.ident	chrII_pilon.g5073
WBGene00003014|F02E9.2|lin-28	protein_coding	lifted_all.ident	chrI_pilon.g1578
WBGene00003015|W03C9.4|lin-29	protein_coding	lifted_all.ident	chrII_pilon.g6065; chrII_pilon.g6066
WBGene00003017|K10G6.1|lin-31	protein_coding	lifted_all.ident	chrII_pilon.g4161
WBGene00003018|T14F9.5|lin-32	protein_coding	lifted_all.ident	chrX_pilon.g18585
WBGene00003019|H32C10.2|lin-33	protein_coding	lifted_all.ident	chrIV_pilon.g10528
WBGene00003020|C32F10.2|lin-35	protein_coding	lifted_all.ident	chrI_pilon.g1001; chrI_pilon.g999
WBGene00003021|F44B9.6|lin-36	protein_coding	lifted_all.ident	chrIII_pilon.g8287
WBGene00003022|ZK418.4|lin-37	protein_coding	lifted_all.ident	chrIII_pilon.g8063
WBGene00003024|C07H6.7|lin-39	protein_coding	lifted_all.ident	chrIII_pilon.g8179
WBGene00003025|T27C4.4|lin-40	protein_coding	lifted_all.ident	chrV_pilon.g13813
WBGene00003026|C12C8.3|lin-41	protein_coding	lifted_all.ident	chrI_pilon.g1784
WBGene00003029|E01A2.3|lin-44	protein_coding	lifted_all.ident	chrI_pilon.g638
WBGene00003030|Y73B6A.5|lin-45	protein_coding	lifted_all.ident	chrIV_pilon.g10681
WBGene00003031|R186.4|lin-46	protein_coding	lifted_all.ident	chrV_pilon.g16148
WBGene00003033|F34D10.5|lin-48	protein_coding	lifted_all.ident	chrIII_pilon.g7311
WBGene00003034|F42A9.2|lin-49	protein_coding	lifted_all.ident	chrIV_pilon.g11120
WBGene00003035|ZK632.13|lin-52	protein_coding	lifted_all.ident	chrIII_pilon.g8718
WBGene00003036|K07A1.12|lin-53	protein_coding	lifted_all.ident	chrI_pilon.g1859
WBGene00003037|JC8.6|lin-54	protein_coding	lifted_all.ident	chrIV_pilon.g12252
WBGene00003038|ZK673.3|lin-56	protein_coding	lifted_all.ident	chrII_pilon.g5730
WBGene00003040|T12F5.4|lin-59	protein_coding	lifted_all.ident	chrI_pilon.g560
WBGene00003041|R06C7.7|lin-61	protein_coding	lifted_all.ident	chrI_pilon.g1347
WBGene00003043|C05B10.1|lip-1	protein_coding	lifted_all.ident	chrIV_pilon.g10702
WBGene00003044|F18A1.3|lir-1	protein_coding	lifted_all.ident	chrII_pilon.g5072
WBGene00003045|F18A1.4|lir-2	protein_coding	lifted_all.ident	chrII_pilon.g5071
WBGene00003046|F37H8.1|lir-3	protein_coding	lifted_all.ident	chrII_pilon.g5894
WBGene00003047|T03F6.5|lis-1	protein_coding	lifted_all.ident	chrIII_pilon.g9333
WBGene00003048|W06F12.1|lit-1	protein_coding	lifted_all.ident	chrIII_pilon.g9407
WBGene00003052|DY3.2|lmn-1	protein_coding	lifted_all.ident	chrI_pilon.g1669
WBGene00003053|C03B1.12|lmp-1	protein_coding	lifted_all.ident	chrX_pilon.g19225
WBGene00003055|F48E8.1|lon-1	protein_coding	lifted_all.ident	chrIII_pilon.g7716
WBGene00003056|C39E6.1|lon-2	protein_coding	lifted_all.ident	chrX_pilon.g18964
WBGene00003057|ZK836.1|lon-3	protein_coding	lifted_all.ident	chrV_pilon.g15951
WBGene00003058|ZK945.9|lov-1	protein_coding	lifted_all.ident	chrII_pilon.g5665
WBGene00003059|C48E7.3|lpd-2	protein_coding	lifted_all.ident	chrI_pilon.g1111
WBGene00003060|Y47G6A.23|lpd-3	protein_coding	lifted_all.ident	chrI_pilon.g533
WBGene00003061|ZK973.10|lpd-5	protein_coding	lifted_all.ident	chrI_pilon.g692
WBGene00003062|K09H9.6|lpd-6	protein_coding	lifted_all.ident	chrI_pilon.g464
WBGene00003063|R13A5.12|lpd-7	protein_coding	lifted_all.ident	chrIII_pilon.g8186
WBGene00003064|R10H10.1|lpd-8	protein_coding	lifted_all.ident	chrIV_pilon.g11584
WBGene00003065|T21C9.5|lpd-9	protein_coding	lifted_all.ident	chrV_pilon.g15560
WBGene00003066|ZC410.7|lpl-1	protein_coding	lifted_all.ident	chrIV_pilon.g11232
WBGene00003068|T27C10.6|lrk-1	protein_coding	lifted_all.ident	chrI_pilon.g2160; chrI_pilon.g2163
WBGene00003071|F29D11.1|lrp-1	protein_coding	lifted_all.ident	chrI_pilon.g1424
WBGene00003072|T21E3.3|lrp-2	protein_coding	lifted_all.ident	chrI_pilon.g616
WBGene00003073|R74.1|lars-1	protein_coding	lifted_all.ident	chrIII_pilon.g7390
WBGene00003074|ZK524.3|lars-2	protein_coding	lifted_all.ident	chrI_pilon.g1388
WBGene00003075|T04H1.6|lrx-1	protein_coding	lifted_all.ident	chrV_pilon.g15960
WBGene00003076|F40F8.9|lsm-1	protein_coding	lifted_all.ident	chrII_pilon.g5882
WBGene00003077|Y62E10A.12|lsm-3	protein_coding	lifted_all.ident	chrIV_pilon.g12294
WBGene00003078|F32A5.7|lsm-4	protein_coding	lifted_all.ident	chrII_pilon.g4979
WBGene00003079|F28F8.3|lsm-5	protein_coding	lifted_all.ident
WBGene00003080|Y71G12B.14|lsm-6	protein_coding	lifted_all.ident	chrI_pilon.g229
WBGene00003081|ZK593.7|lsm-7	protein_coding	lifted_all.ident	chrIV_pilon.g11719
WBGene00003082|Y73B6BL.32|lsm-8	protein_coding	lifted_all.ident	chrIV_pilon.g10599
WBGene00003083|T22A3.3|lst-1	protein_coding	lifted_all.ident	chrI_pilon.g2084
WBGene00003084|R160.7|lst-2	protein_coding	lifted_all.ident	chrX_pilon.g18912
WBGene00003085|Y37A1B.1|ccar-1	protein_coding	lifted_all.ident	chrIV_pilon.g12418
WBGene00003086|Y37A1B.2|lst-4	protein_coding	lifted_all.ident	chrIV_pilon.g12417
WBGene00003087|F49H12.1|lsy-2	protein_coding	lifted_all.ident	chrX_pilon.g18562
WBGene00003089|K02C4.4|ltd-1	protein_coding	lifted_all.ident	chrII_pilon.g5157
WBGene00003090|Y22F5A.4|lys-1	protein_coding	lifted_all.ident	chrV_pilon.g15474
WBGene00003091|Y22F5A.5|lys-2	protein_coding	lifted_all.ident	chrV_pilon.g15475
WBGene00003092|Y22F5A.6|lys-3	protein_coding	lifted_all.ident	chrV_pilon.g15476
WBGene00003093|F58B3.1|lys-4	protein_coding	lifted_all.ident	chrIV_pilon.g11892
WBGene00003094|F58B3.2|lys-5	protein_coding	lifted_all.ident	chrIV_pilon.g11893
WBGene00003095|F58B3.3|lys-6	protein_coding	lifted_all.ident	chrIV_pilon.g11894
WBGene00003096|C02A12.4|lys-7	protein_coding	lifted_all.ident	chrV_pilon.g13757
WBGene00003097|C17G10.5|lys-8	protein_coding	lifted_all.ident	chrII_pilon.g4550
WBGene00003098|C54C8.6|lys-9	protein_coding	lifted_all.ident	chrI_pilon.g2506
WBGene00003099|F17E9.11|lys-10	protein_coding	lifted_all.ident
WBGene00003100|Y53C12B.5|mab-3	protein_coding	lifted_all.ident	chrII_pilon.g5580
WBGene00003102|C08C3.3|mab-5	protein_coding	lifted_all.ident	chrIII_pilon.g8226
WBGene00003104|ZC13.4|mab-7	protein_coding	lifted_all.ident	chrX_pilon.g18345
WBGene00003106|T27A1.6|mab-9	protein_coding	lifted_all.ident	chrII_pilon.g3127
WBGene00003107|R166.1|mab-10	protein_coding	lifted_all.ident	chrII_pilon.g5755
WBGene00003111|Y71G12B.20|mab-20	protein_coding	lifted_all.ident	chrI_pilon.g218
WBGene00003112|F35G12.6|mab-21	protein_coding	lifted_all.ident	chrIII_pilon.g7489
WBGene00003114|C32C4.5|mab-23	protein_coding	lifted_all.ident	chrV_pilon.g15573
WBGene00003119|Y48C3A.7|mac-1	protein_coding	lifted_all.ident	chrII_pilon.g6351
WBGene00003123|R09B3.5|mag-1	protein_coding	lifted_all.ident	chrI_pilon.g2368
WBGene00003124|K10B3.9|mai-1	protein_coding	lifted_all.ident	chrX_pilon.g18706
WBGene00003129|Y37E11AL.7|map-1	protein_coding	lifted_all.ident	chrIV_pilon.g10018
WBGene00003130|Y116A8A.9|map-2	protein_coding	lifted_all.ident	chrIV_pilon.g12786
WBGene00003132|Y110A7A.17|mat-1	protein_coding	lifted_all.ident	chrI_pilon.g846
WBGene00003133|W10C6.1|mat-2	protein_coding	lifted_all.ident	chrII_pilon.g5879
WBGene00003134|F10C5.1|mat-3	protein_coding	lifted_all.ident	chrIII_pilon.g6761
WBGene00003136|C09H6.3|mau-2	protein_coding	lifted_all.ident	chrI_pilon.g1524
WBGene00003142|Y62E10A.8|mau-8	protein_coding	lifted_all.ident	chrIV_pilon.g12288
WBGene00003143|C34B4.1|max-1	protein_coding	lifted_all.ident	chrV_pilon.g16176
WBGene00003144|Y38F1A.10|max-2	protein_coding	lifted_all.ident	chrII_pilon.g6302
WBGene00003148|H21P03.1|mbf-1	protein_coding	lifted_all.ident	chrIV_pilon.g11863
WBGene00003149|T04C10.1|mbk-1	protein_coding	lifted_all.ident	chrX_pilon.g20650
WBGene00003150|F49E11.1|mbk-2	protein_coding	lifted_all.ident	chrIV_pilon.g12196
WBGene00003151|W09C2.3|mca-1	protein_coding	lifted_all.ident	chrIV_pilon.g11367
WBGene00003153|Y67D8C.10|mca-3	protein_coding	lifted_all.ident	chrIV_pilon.g9914; chrIV_pilon.g9915
WBGene00003154|Y17G7B.5|mcm-2	protein_coding	lifted_all.ident	chrII_pilon.g6081
WBGene00003155|C25D7.6|mcm-3	protein_coding	lifted_all.ident	chrV_pilon.g16681
WBGene00003156|Y39G10AR.14|mcm-4	protein_coding	lifted_all.ident	chrI_pilon.g319
WBGene00003157|R10E4.4|mcm-5	protein_coding	lifted_all.ident	chrIII_pilon.g7411
WBGene00003158|ZK632.1|mcm-6	protein_coding	lifted_all.ident	chrIII_pilon.g8708
WBGene00003159|F32D1.10|mcm-7	protein_coding	lifted_all.ident	chrV_pilon.g13979
[truncated: 18,105 more rows]

## Sheet: ncRNA
Gene	Gene_type	Liftover_status
Transcript:AC8.13	ncRNA	lifted_bad.coding
Transcript:AC8.8	ncRNA	lifted_bad.coding
Transcript:AH9.5	ncRNA	lifted_bad.coding
Transcript:B0034.6	ncRNA	lifted_bad.coding
Transcript:B0035.17	ncRNA	lifted_bad.coding
Transcript:B0286.7	ncRNA	lifted_bad.coding
Transcript:B0361.12	ncRNA	lifted_bad.coding
Transcript:B0395.4	ncRNA	lifted_bad.coding
Transcript:C01B12.11	ncRNA	lifted_bad.coding
Transcript:C01B12.12	ncRNA	lifted_bad.coding
Transcript:C04E12.13	ncRNA	lifted_bad.coding
Transcript:C04F6.6	ncRNA	lifted_bad.coding
Transcript:C05G5.6	ncRNA	lifted_bad.coding
Transcript:C06A6.6	ncRNA	lifted_bad.coding
Transcript:C06H2.8	ncRNA	lifted_bad.coding
Transcript:C07B3.1	ncRNA	lifted_bad.coding
Transcript:C09B9.86	ncRNA	lifted_bad.coding
Transcript:C11D2.102	ncRNA	lifted_bad.coding
Transcript:C11H1.12	ncRNA	lifted_bad.coding
Transcript:C12C8.4	ncRNA	lifted_bad.coding
Transcript:C13B4.3	ncRNA	lifted_bad.coding
Transcript:C14A11.8	ncRNA	lifted_bad.coding
Transcript:C14E2.8	ncRNA	lifted_bad.coding
Transcript:C16H3.5	ncRNA	lifted_bad.coding
Transcript:C16H3.8	ncRNA	lifted_bad.coding
Transcript:C18A11.8	ncRNA	lifted_bad.coding
Transcript:C18D11.11	ncRNA	lifted_bad.coding
Transcript:C23G10.13	ncRNA	lifted_bad.coding
Transcript:C24H12.16	ncRNA	lifted_bad.coding
Transcript:C24H12.17	ncRNA	lifted_bad.coding
Transcript:C27A12.13	ncRNA	lifted_bad.coding
Transcript:C28D4.16	ncRNA	lifted_bad.coding
Transcript:C29E6.7	ncRNA	lifted_bad.coding
Transcript:C31B8.17	ncRNA	lifted_bad.coding
Transcript:C32C4.6	ncRNA	lifted_bad.coding
Transcript:C32D5.13	ncRNA	lifted_bad.coding
Transcript:C34E11.5	ncRNA	lifted_bad.coding
Transcript:C34E11.6	ncRNA	lifted_bad.coding
Transcript:C39D10.10	ncRNA	lifted_bad.coding
Transcript:C39D10.12	ncRNA	lifted_bad.coding
Transcript:C39D10.18	ncRNA	lifted_bad.coding
Transcript:C39E6.7	ncRNA	lifted_bad.coding
Transcript:C39E6.8	ncRNA	lifted_bad.coding
Transcript:C40A11.10	ncRNA	lifted_bad.coding
Transcript:C41G7.14	ncRNA	lifted_bad.coding
Transcript:C44B11.5	ncRNA	lifted_bad.coding
Transcript:C44C11.7	ncRNA	lifted_bad.coding
Transcript:C46A5.10	ncRNA	lifted_bad.coding
Transcript:C46F2.2	ncRNA	lifted_bad.coding
Transcript:C50H11.19	ncRNA	lifted_bad.coding
Transcript:C52E12.7	ncRNA	lifted_bad.coding
Transcript:C54G10.6	ncRNA	lifted_bad.coding
Transcript:C55B6.8	ncRNA	lifted_bad.coding
Transcript:D1007.17	ncRNA	lifted_bad.coding
Transcript:E01F3.2	ncRNA	lifted_bad.coding
Transcript:E01G4.9	ncRNA	lifted_bad.coding
Transcript:EGAP1.2	ncRNA	lifted_bad.coding
Transcript:F07A11.16	ncRNA	lifted_bad.coding
Transcript:F07A11.8	ncRNA	lifted_bad.coding
Transcript:F08F3.11	ncRNA	lifted_bad.coding
Transcript:F08G12.12	ncRNA	lifted_bad.coding
Transcript:F09A5.5	ncRNA	lifted_bad.coding
Transcript:F09A5.6	ncRNA	lifted_bad.coding
Transcript:F09A5.8	ncRNA	lifted_bad.coding
Transcript:F10C2.8	ncRNA	lifted_bad.coding
Transcript:F13D11.5	ncRNA	lifted_bad.coding
Transcript:F13H10.7	ncRNA	lifted_bad.coding
Transcript:F16A11.4	ncRNA	lifted_bad.coding
Transcript:F18E9.9	ncRNA	lifted_bad.coding
Transcript:F19C6.6	ncRNA	lifted_bad.coding
Transcript:F20D1.11	ncRNA	lifted_bad.coding
Transcript:F21A9.4	ncRNA	lifted_bad.coding
Transcript:F22D3.9	ncRNA	lifted_bad.coding
Transcript:F22F1.4	ncRNA	lifted_bad.coding
Transcript:F25D1.6	ncRNA	lifted_bad.coding
Transcript:F25G6.10	ncRNA	lifted_bad.coding
Transcript:F25G6.11	ncRNA	lifted_bad.coding
Transcript:F26H11.7	ncRNA	lifted_bad.coding
Transcript:F31E3.11	ncRNA	lifted_bad.coding
Transcript:F31E3.7	ncRNA	lifted_bad.coding
Transcript:F33E2.9	ncRNA	lifted_bad.coding
Transcript:F35F10.16	ncRNA	lifted_bad.coding
Transcript:F35G12.13	ncRNA	lifted_bad.coding
Transcript:F36A4.16	ncRNA	lifted_bad.coding
Transcript:F36H1.7	ncRNA	lifted_bad.coding
Transcript:F36H1.8	ncRNA	lifted_bad.coding
Transcript:F36H12.64	ncRNA	lifted_bad.coding
Transcript:F37B1.9	ncRNA	lifted_bad.coding
Transcript:F39B1.2	ncRNA	lifted_bad.coding
Transcript:F39E9.13	ncRNA	lifted_bad.coding
Transcript:F41G3.23	ncRNA	lifted_bad.coding
Transcript:F42G8.17	ncRNA	lifted_bad.coding
Transcript:F44E7.11	ncRNA	lifted_bad.coding
Transcript:F46A9.7	ncRNA	lifted_bad.coding
Transcript:F46F2.8	ncRNA	lifted_bad.coding
Transcript:F46G11.5	ncRNA	lifted_bad.coding
Transcript:F49E12.11	ncRNA	lifted_bad.coding
Transcript:F53G2.11	ncRNA	lifted_bad.coding
Transcript:F53G2.9	ncRNA	lifted_bad.coding
Transcript:F54B11.12	ncRNA	lifted_bad.coding
Transcript:F55A11.12	ncRNA	lifted_bad.coding
Transcript:F55A11.9	ncRNA	lifted_bad.coding
Transcript:F55D12.7	ncRNA	lifted_bad.coding
Transcript:F55F3.10	ncRNA	lifted_bad.coding
Transcript:F55F3.11	ncRNA	lifted_bad.coding
Transcript:F56A12.3	ncRNA	lifted_bad.coding
Transcript:F56A12.4	ncRNA	lifted_bad.coding
Transcript:F56C3.13	ncRNA	lifted_bad.coding
Transcript:F59D6.8	ncRNA	lifted_bad.coding
Transcript:F59D6.9	ncRNA	lifted_bad.coding
Transcript:F59F3.7	ncRNA	lifted_bad.coding
Transcript:F59G1.6	ncRNA	lifted_bad.coding
Transcript:H25K10.142	ncRNA	lifted_bad.coding
Transcript:K01A6.22	ncRNA	lifted_bad.coding
Transcript:K01F9.1	ncRNA	lifted_bad.coding
Transcript:K01F9.3	ncRNA	lifted_bad.coding
Transcript:K01F9.5	ncRNA	lifted_bad.coding
Transcript:K02B9.5	ncRNA	lifted_bad.coding
Transcript:K02E7.13	ncRNA	lifted_bad.coding
Transcript:K09A9.7	ncRNA	lifted_bad.coding
Transcript:K09F6.12	ncRNA	lifted_bad.coding
Transcript:K10C2.9	ncRNA	lifted_bad.coding
Transcript:K12D12.10	ncRNA	lifted_bad.coding
Transcript:LLC1.122	ncRNA	lifted_bad.coding
Transcript:M01F1.11	ncRNA	lifted_bad.coding
Transcript:M03B6.6	ncRNA	lifted_bad.coding
Transcript:M04C9.7	ncRNA	lifted_bad.coding
Transcript:M04C9.8	ncRNA	lifted_bad.coding
Transcript:M106.9	ncRNA	lifted_bad.coding
Transcript:R04A9.8	ncRNA	lifted_bad.coding
Transcript:R05C11.6	ncRNA	lifted_bad.coding
Transcript:R08C7.14	ncRNA	lifted_bad.coding
Transcript:R11.5	ncRNA	lifted_bad.coding
Transcript:R11.6	ncRNA	lifted_bad.coding
Transcript:R13A5.14	ncRNA	lifted_bad.coding
Transcript:T01B10.6	ncRNA	lifted_bad.coding
Transcript:T01B6.12	ncRNA	lifted_bad.coding
Transcript:T04D1.5	ncRNA	lifted_bad.coding
Transcript:T07A9.17	ncRNA	lifted_bad.coding
Transcript:T07C5.6	ncRNA	lifted_bad.coding
Transcript:T07D1.6	ncRNA	lifted_bad.coding
Transcript:T07D1.7	ncRNA	lifted_bad.coding
Transcript:T07D10.7	ncRNA	lifted_bad.coding
Transcript:T07D10.9	ncRNA	lifted_bad.coding
Transcript:T07H8.8	ncRNA	lifted_bad.coding
Transcript:T09A5.13	ncRNA	lifted_bad.coding
Transcript:T09B4.11	ncRNA	lifted_bad.coding
Transcript:T09B4.12	ncRNA	lifted_bad.coding
Transcript:T09B4.20	ncRNA	lifted_bad.coding
Transcript:T09F5.21	ncRNA	lifted_bad.coding
Transcript:T10H9.7	ncRNA	lifted_bad.coding
Transcript:T11G6.10	ncRNA	lifted_bad.coding
Transcript:T11G6.12	ncRNA	lifted_bad.coding
Transcript:T12E12.7	ncRNA	lifted_bad.coding
Transcript:T12E12.8	ncRNA	lifted_bad.coding
Transcript:T14G12.7	ncRNA	lifted_bad.coding
Transcript:T16G12.11	ncRNA	lifted_bad.coding
Transcript:T19E7.28	ncRNA	lifted_bad.coding
Transcript:T21B4.13	ncRNA	lifted_bad.coding
Transcript:T21D12.13	ncRNA	lifted_bad.coding
Transcript:T22A3.9	ncRNA	lifted_bad.coding
Transcript:T22C1.13	ncRNA	lifted_bad.coding
Transcript:T23F6.6	ncRNA	lifted_bad.coding
Transcript:T24D8.7	ncRNA	lifted_bad.coding
Transcript:T24D8.8	ncRNA	lifted_bad.coding
Transcript:T24D8.9	ncRNA	lifted_bad.coding
Transcript:T26C12.5	ncRNA	lifted_bad.coding
Transcript:T27D12.11	ncRNA	lifted_bad.coding
Transcript:T27D12.5	ncRNA	lifted_bad.coding
Transcript:T28F3.10	ncRNA	lifted_bad.coding
Transcript:W02B12.14	ncRNA	lifted_bad.coding
Transcript:W02B9.4	ncRNA	lifted_bad.coding
Transcript:W03G11.5	ncRNA	lifted_bad.coding
Transcript:W06F12.9	ncRNA	lifted_bad.coding
Transcript:W08D2.14	ncRNA	lifted_bad.coding
Transcript:W09C5.16	ncRNA	lifted_bad.coding
Transcript:W09G3.10	ncRNA	lifted_bad.coding
Transcript:W09G3.11	ncRNA	lifted_bad.coding
Transcript:W09H1.8	ncRNA	lifted_bad.coding
Transcript:Y102A5D.4	ncRNA	lifted_bad.coding
Transcript:Y105C5A.1286	ncRNA	lifted_bad.coding
Transcript:Y105E8A.31	ncRNA	lifted_bad.coding
Transcript:Y105E8A.51	ncRNA	lifted_bad.coding
Transcript:Y116A8C.464	ncRNA	lifted_bad.coding
Transcript:Y23B4A.3	ncRNA	lifted_bad.coding
Transcript:Y23H5B.14	ncRNA	lifted_bad.coding
Transcript:Y37A1B.16	ncRNA	lifted_bad.coding
Transcript:Y37B11A.6	ncRNA	lifted_bad.coding
Transcript:Y37F4.9	ncRNA	lifted_bad.coding
Transcript:Y38E10A.27	ncRNA	lifted_bad.coding
Transcript:Y38F2AR.22	ncRNA	lifted_bad.coding
Transcript:Y40H7A.12	ncRNA	lifted_bad.coding
Transcript:Y41C4A.20	ncRNA	lifted_bad.coding
Transcript:Y41E3.214	ncRNA	lifted_bad.coding
Transcript:Y41G9A.11	ncRNA	lifted_bad.coding
Transcript:Y41G9A.7	ncRNA	lifted_bad.coding
Transcript:Y41G9A.9	ncRNA	lifted_bad.coding
Transcript:Y47H9C.21	ncRNA	lifted_bad.coding
Transcript:Y48C3A.21	ncRNA	lifted_bad.coding
Transcript:Y48D7A.3	ncRNA	lifted_bad.coding
Transcript:Y48G9A.13	ncRNA	lifted_bad.coding
Transcript:Y48G9A.14	ncRNA	lifted_bad.coding
Transcript:Y48G9A.15	ncRNA	lifted_bad.coding
Transcript:Y48G9A.16	ncRNA	lifted_bad.coding
Transcript:Y50D4A.11	ncRNA	lifted_bad.coding
Transcript:Y51A2D.39	ncRNA	lifted_bad.coding
Transcript:Y51H4A.34	ncRNA	lifted_bad.coding
Transcript:Y51H4A.402	ncRNA	lifted_bad.coding
Transcript:Y53G8AL.5	ncRNA	lifted_bad.coding
Transcript:Y55F3AM.16	ncRNA	lifted_bad.coding
Transcript:Y55F3AM.17	ncRNA	lifted_bad.coding
Transcript:Y55F3AM.18	ncRNA	lifted_bad.coding
Transcript:Y55F3AM.19	ncRNA	lifted_bad.coding
Transcript:Y55F3AM.20	ncRNA	lifted_bad.coding
Transcript:Y56A3A.34	ncRNA	lifted_bad.coding
Transcript:Y56A3A.40	ncRNA	lifted_bad.coding
Transcript:Y57A10A.42	ncRNA	lifted_bad.coding
Transcript:Y59A8B.39	ncRNA	lifted_bad.coding
Transcript:Y59E1B.10	ncRNA	lifted_bad.coding
Transcript:Y59E1B.11	ncRNA	lifted_bad.coding
Transcript:Y59E1B.12	ncRNA	lifted_bad.coding
Transcript:Y59E1B.13	ncRNA	lifted_bad.coding
Transcript:Y59E1B.15	ncRNA	lifted_bad.coding
Transcript:Y59E1B.3	ncRNA	lifted_bad.coding
Transcript:Y59E1B.4	ncRNA	lifted_bad.coding
Transcript:Y59E1B.6	ncRNA	lifted_bad.coding
Transcript:Y59E1B.7	ncRNA	lifted_bad.coding
Transcript:Y59E1B.8	ncRNA	lifted_bad.coding
Transcript:Y59E1B.9	ncRNA	lifted_bad.coding
Transcript:Y62F5A.2	ncRNA	lifted_bad.coding
Transcript:Y62F5A.3	ncRNA	lifted_bad.coding
Transcript:Y62F5A.4	ncRNA	lifted_bad.coding
Transcript:Y62F5A.5	ncRNA	lifted_bad.coding
Transcript:Y62F5A.6	ncRNA	lifted_bad.coding
Transcript:Y62F5A.7	ncRNA	lifted_bad.coding
Transcript:Y62F5A.8	ncRNA	lifted_bad.coding
Transcript:Y64G10A.14	ncRNA	lifted_bad.coding
Transcript:Y67D8A.4	ncRNA	lifted_bad.coding
Transcript:Y71A12B.20	ncRNA	lifted_bad.coding
Transcript:Y71F9AL.22	ncRNA	lifted_bad.coding
Transcript:Y71F9AL.23	ncRNA	lifted_bad.coding
Transcript:Y71G12B.29	ncRNA	lifted_bad.coding
Transcript:Y73B6A.7	ncRNA	lifted_bad.coding
Transcript:Y73B6BL.290	ncRNA	lifted_bad.coding
Transcript:Y87G2A.21	ncRNA	lifted_bad.coding
Transcript:ZK384.5	ncRNA	lifted_bad.coding
Transcript:ZK455.9	ncRNA	lifted_bad.coding
Transcript:ZK525.3	ncRNA	lifted_bad.coding
Transcript:ZK593.10	ncRNA	lifted_bad.coding
Transcript:ZK593.12	ncRNA	lifted_bad.coding
Transcript:ZK652.12	ncRNA	lifted_bad.coding
Transcript:ZK652.13	ncRNA	lifted_bad.coding
Transcript:ZK84.8	ncRNA	lifted_bad.coding
Transcript:ZK930.10	ncRNA	lifted_bad.coding
Transcript:ZK930.11	ncRNA	lifted_bad.coding
Transcript:ZK930.8	ncRNA	lifted_bad.coding
Transcript:ZK930.9	ncRNA	lifted_bad.coding
WBGene00000308|C04A11.t1	ncRNA	lifted_all.ident
WBGene00000310|C05C9.t1	ncRNA	lifted_all.ident
WBGene00000311|C05C9.t2	ncRNA	lifted_all.ident
WBGene00002285|C05G5.6|let-7	ncRNA	lifted_all.ident
WBGene00002993|F59G1.6|lin-4	ncRNA	lifted_all.ident
WBGene00003039|F56A12.3|mir-48	ncRNA	lifted_all.ident
WBGene00003088|C32C4.6|lsy-6	ncRNA	lifted_all.ident
WBGene00003260|T09B4.11|mir-1	ncRNA	lifted_all.ident
WBGene00003261|M04C9.7|mir-2	ncRNA	lifted_all.ident
WBGene00003262|Y41G9A.7|mir-34	ncRNA	lifted_all.ident
WBGene00003263|Y62F5A.2|mir-35	ncRNA	lifted_all.ident
WBGene00003264|Y62F5A.3|mir-36	ncRNA	lifted_all.ident
WBGene00003265|Y62F5A.4|mir-37	ncRNA	lifted_all.ident
WBGene00003266|Y62F5A.5|mir-38	ncRNA	lifted_all.ident
WBGene00003267|Y62F5A.6|mir-39	ncRNA	lifted_all.ident
WBGene00003268|Y62F5A.7|mir-40	ncRNA	lifted_all.ident
WBGene00003269|Y62F5A.8|mir-41	ncRNA	lifted_all.ident
WBGene00003270|ZK930.8|mir-42	ncRNA	lifted_all.ident
WBGene00003271|ZK930.9|mir-43	ncRNA	lifted_all.ident
WBGene00003272|ZK930.10|mir-44	ncRNA	lifted_all.ident
WBGene00003273|ZK930.11|mir-45	ncRNA	lifted_all.ident
WBGene00003274|ZK525.3|mir-46	ncRNA	lifted_all.ident
WBGene00003275|K02B9.5|mir-47	ncRNA	lifted_all.ident
WBGene00003277|F19C6.6|mir-49	ncRNA	lifted_all.ident
WBGene00003278|Y71G12B.29|mir-50	ncRNA	lifted_all.ident
WBGene00003279|F36H1.7|mir-51	ncRNA	lifted_all.ident
WBGene00003280|Y37A1B.16|mir-52	ncRNA	lifted_all.ident
WBGene00003281|F36H1.8|mir-53	ncRNA	lifted_all.ident
WBGene00003282|F09A5.5|mir-54	ncRNA	lifted_all.ident
WBGene00003283|F09A5.6|mir-55	ncRNA	lifted_all.ident
WBGene00003284|F09A5.8|mir-56	ncRNA	lifted_all.ident
WBGene00003285|T09A5.13|mir-57	ncRNA	lifted_all.ident
WBGene00003286|Y67D8A.4|mir-58.1	ncRNA	lifted_all.ident
WBGene00003287|B0035.17|mir-59	ncRNA	lifted_all.ident
WBGene00003288|C32D5.13|mir-60	ncRNA	lifted_all.ident
WBGene00003289|F55A11.9|mir-61	ncRNA	lifted_all.ident
WBGene00003290|T07C5.6|mir-62	ncRNA	lifted_all.ident
WBGene00003291|C16H3.5|mir-63	ncRNA	lifted_all.ident
WBGene00003292|Y48G9A.13|mir-64	ncRNA	lifted_all.ident
WBGene00003293|Y48G9A.14|mir-65	ncRNA	lifted_all.ident
WBGene00003294|Y48G9A.15|mir-66	ncRNA	lifted_all.ident
WBGene00003295|EGAP1.2|mir-67	ncRNA	lifted_all.ident
WBGene00003296|Y51H4A.27	ncRNA	lifted_all.ident
WBGene00003297|Y41D4B.25	ncRNA	lifted_all.ident
WBGene00003298|T10H9.7|mir-70	ncRNA	lifted_all.ident
WBGene00003299|F16A11.4|mir-71	ncRNA	lifted_all.ident
WBGene00003300|F53G2.9|mir-72	ncRNA	lifted_all.ident
WBGene00003301|T24D8.9|mir-73	ncRNA	lifted_all.ident
WBGene00003302|T24D8.7|mir-74	ncRNA	lifted_all.ident
WBGene00003303|T24D8.8|mir-75	ncRNA	lifted_all.ident
WBGene00003304|C44B11.5|mir-76	ncRNA	lifted_all.ident
WBGene00003305|T21B4.13|mir-77	ncRNA	lifted_all.ident
WBGene00003306|Y40H7A.12|mir-78	ncRNA	lifted_all.ident
WBGene00003307|C12C8.4|mir-79	ncRNA	lifted_all.ident
WBGene00003308|K01F9.3|mir-80	ncRNA	lifted_all.ident
WBGene00003309|T07D1.6|mir-81	ncRNA	lifted_all.ident
WBGene00003310|T07D1.7|mir-82	ncRNA	lifted_all.ident
WBGene00003311|C06A6.6|mir-83	ncRNA	lifted_all.ident
WBGene00003312|B0395.4|mir-84	ncRNA	lifted_all.ident
WBGene00003313|F49E12.11|mir-85	ncRNA	lifted_all.ident
WBGene00003314|Y56A3A.34|mir-86	ncRNA	lifted_all.ident
WBGene00003315|F10C2.8|mir-87	ncRNA	lifted_all.ident
WBGene00003316|C32E12.6	ncRNA	lifted_all.ident
WBGene00003317|C32C4.4	ncRNA	lifted_all.ident
WBGene00003318|K01F9.1|mir-90	ncRNA	lifted_all.ident
WBGene00003319|C29E6.7|mir-124	ncRNA	lifted_all.ident
WBGene00003321|T12E12.7|mir-228	ncRNA	lifted_all.ident
WBGene00003322|Y48G9A.16|mir-229	ncRNA	lifted_all.ident
WBGene00003323|F46G11.5|mir-230	ncRNA	lifted_all.ident
WBGene00003324|R13A5.14|mir-231	ncRNA	lifted_all.ident
WBGene00003325|F13H10.7|mir-232	ncRNA	lifted_all.ident
WBGene00003326|W03G11.5|mir-233	ncRNA	lifted_all.ident
WBGene00003327|C13B4.3|mir-234	ncRNA	lifted_all.ident
WBGene00003328|T09B4.12|mir-235	ncRNA	lifted_all.ident
WBGene00003329|C52E12.7|mir-236	ncRNA	lifted_all.ident
WBGene00003330|F22F1.4|mir-237	ncRNA	lifted_all.ident
WBGene00003331|K01F9.5|mir-238	ncRNA	lifted_all.ident
WBGene00003332|C34E11.5|mir-239.1	ncRNA	lifted_all.ident
WBGene00003333|C34E11.6|mir-239.2	ncRNA	lifted_all.ident
WBGene00003334|C39D10.10|mir-240	ncRNA	lifted_all.ident
WBGene00003335|F56A12.4|mir-241	ncRNA	lifted_all.ident
WBGene00003336|F36A4.16|mir-242	ncRNA	lifted_all.ident
WBGene00003337|R08C7.14|mir-243	ncRNA	lifted_all.ident
WBGene00003338|T04D1.5|mir-244	ncRNA	lifted_all.ident
WBGene00003339|F55D12.7|mir-245	ncRNA	lifted_all.ident
WBGene00003340|ZK593.10|mir-246	ncRNA	lifted_all.ident
WBGene00003341|C39E6.7|mir-247	ncRNA	lifted_all.ident
WBGene00003342|AH9.5|mir-248	ncRNA	lifted_all.ident
WBGene00003343|Y48D7A.3|mir-249	ncRNA	lifted_all.ident
WBGene00003344|F55A11.12|mir-250	ncRNA	lifted_all.ident
WBGene00003345|F59F3.7|mir-251	ncRNA	lifted_all.ident
WBGene00003346|W02B12.14|mir-252	ncRNA	lifted_all.ident
WBGene00003347|F44E7.11|mir-253	ncRNA	lifted_all.ident
WBGene00003348|ZK455.9|mir-254	ncRNA	lifted_all.ident
WBGene00003349|F08F3.11|mir-255	ncRNA	lifted_all.ident
WBGene00003350|T07H8.8|mir-256	ncRNA	lifted_all.ident
WBGene00003351|Y102A5D.4|mir-257	ncRNA	lifted_all.ident
WBGene00003352|AC8.8|mir-258.1	ncRNA	lifted_all.ident
WBGene00003353|F25D1.6|mir-259	ncRNA	lifted_all.ident
WBGene00003354|F39E9.13|mir-260	ncRNA	lifted_all.ident
WBGene00003355|B0034.6|mir-261	ncRNA	lifted_all.ident
WBGene00003356|ZK384.5|mir-262	ncRNA	lifted_all.ident
WBGene00003357|C14A11.8|mir-264	ncRNA	lifted_all.ident
WBGene00003358|T23F6.6|mir-265	ncRNA	lifted_all.ident
WBGene00003359|T14G12.7|mir-266	ncRNA	lifted_all.ident
WBGene00003360|Y38E10A.27|mir-267	ncRNA	lifted_all.ident
WBGene00003361|C06H2.8|mir-268	ncRNA	lifted_all.ident
WBGene00003362|T21D12.13|mir-269	ncRNA	lifted_all.ident
WBGene00003363|T26C12.5|mir-270	ncRNA	lifted_all.ident
WBGene00003364|C04F6.6|mir-271	ncRNA	lifted_all.ident
WBGene00003365|Y41C4A.20|mir-272	ncRNA	lifted_all.ident
WBGene00003366|E01F3.2|mir-273	ncRNA	lifted_all.ident
WBGene00004512|F31C3.7|rrn-1.1	ncRNA	lifted_all.ident
WBGene00004513|F31C3.8|rrn-1.2	ncRNA	lifted_all.ident
WBGene00004567|F31C3.11|rrn-2.1	ncRNA	lifted_all.ident
WBGene00004622|F31C3.9|rrn-3.1	ncRNA	lifted_no.ident
WBGene00004708|C04C11.t1|rte-1	ncRNA	lifted_all.ident
WBGene00004716|K06G5.t1|rtw-5	ncRNA	lifted_all.ident
WBGene00004717|Y40C5A.t1|rtw-6	ncRNA	lifted_all.ident
WBGene00004833|ZK1248.18|sls-2.1	ncRNA	lifted_all.ident
WBGene00004834|C17C3.16|sls-2.2	ncRNA	lifted_all.ident
WBGene00004835|C17C3.17|sls-2.3	ncRNA	lifted_all.ident
WBGene00004836|R12E2.16|sls-2.4	ncRNA	lifted_all.ident
WBGene00004837|B0280.14|sls-2.5	ncRNA	lifted_all.ident
WBGene00004838|W06D4.7|sls-2.6	ncRNA	lifted_all.ident
WBGene00004839|W06D4.8|sls-2.7	ncRNA	lifted_all.ident
WBGene00004840|Y75B8A.38|sls-2.8	ncRNA	lifted_all.ident
WBGene00004841|M01E5.7|sls-2.9	ncRNA	lifted_all.ident
WBGene00004842|F23B2.14|sls-2.10	ncRNA	lifted_all.ident
WBGene00004843|F23B2.15|sls-2.11	ncRNA	lifted_all.ident
WBGene00004844|F36H12.19|sls-2.12	ncRNA	lifted_all.ident
WBGene00004845|R13H9.7|sls-2.13	ncRNA	lifted_all.ident
WBGene00004846|W09D6.7|sls-2.14	ncRNA	lifted_all.ident
WBGene00004847|W09D6.8|sls-2.15	ncRNA	lifted_all.ident
WBGene00004848|B0280.15|sls-2.16	ncRNA	lifted_all.ident
WBGene00004849|ZK354.12|sls-2.17	ncRNA	lifted_all.ident
WBGene00004850|B0280.16|sls-2.18	ncRNA	lifted_all.ident
WBGene00006314|B0523.t1|sup-5	ncRNA	lifted_all.ident
WBGene00006315|F58G1.10|sup-6	ncRNA	lifted_all.ident
WBGene00006316|C03B1.t1|sup-7	ncRNA	lifted_all.ident
WBGene00006327|C06E2.t1|sup-21	ncRNA	lifted_all.ident
WBGene00006330|Y73F8A.t2|sup-24	ncRNA	lifted_all.ident
WBGene00006333|C48C5.t6|sup-28	ncRNA	lifted_all.ident
WBGene00006334|Y37E11AL.t1|sup-29	ncRNA	lifted_all.ident
WBGene00006338|D1073.t1|sup-33	ncRNA	lifted_all.ident
WBGene00006344|C15F1.9|sup-39	ncRNA	lifted_all.ident
WBGene00006650|F09E10.11|tts-1	ncRNA	lifted_all.ident
WBGene00006651|R05H5.8|tts-2	ncRNA	lifted_all.ident
WBGene00006967|F55G1.16|yrn-1	ncRNA	lifted_all.ident
WBGene00007475|B0285.t1	ncRNA	lifted_all.ident
WBGene00007539|B0334.12	ncRNA	lifted_all.ident
WBGene00008104|B0395.t1	ncRNA	lifted_all.ident
WBGene00008135|B0491.t1	ncRNA	lifted_all.ident
WBGene00008179|B0491.t2	ncRNA	lifted_all.ident
WBGene00009206|B0513.t1	ncRNA	lifted_all.ident
WBGene00009527|C02B4.t1	ncRNA	lifted_all.ident
WBGene00009555|C02B4.t2	ncRNA	lifted_all.ident
WBGene00009936|C02D4.t1	ncRNA	lifted_all.ident
WBGene00010276|C03A3.t1	ncRNA	lifted_all.ident
WBGene00010376|C05E7.t1	ncRNA	lifted_all.ident
WBGene00010424|H36L18.2|lep-5	ncRNA	lifted_all.ident
WBGene00010430|C05E7.t2	ncRNA	lifted_all.ident
WBGene00010431|C05E7.t3	ncRNA	lifted_all.ident
WBGene00010733|C06B8.t1	ncRNA	lifted_all.ident
WBGene00010777|C06B8.t2	ncRNA	lifted_all.ident
WBGene00011346|C06B8.t3	ncRNA	lifted_all.ident
WBGene00011470|C08E8.t3	ncRNA	lifted_all.ident
WBGene00012284|W05H5.2	ncRNA	lifted_all.ident
WBGene00012292|C11E4.t1	ncRNA	lifted_all.ident
WBGene00012350|C11G10.t1	ncRNA	lifted_all.ident
WBGene00012377|C12C8.t1	ncRNA	lifted_all.ident
WBGene00012653|C12C8.t2	ncRNA	lifted_all.ident
WBGene00012752|C12C8.t3	ncRNA	lifted_all.ident
WBGene00012839|Y43F8C.18	ncRNA	lifted_all.ident
WBGene00013010|C12C8.t4	ncRNA	lifted_all.ident
WBGene00013386|C12C8.t5	ncRNA	lifted_all.ident
WBGene00013640|Y105C5A.17	ncRNA	lifted_all.ident
WBGene00013918|C12C8.t6	ncRNA	lifted_all.ident
WBGene00013948|C13B4.t1	ncRNA	lifted_all.ident
WBGene00013993|C15C6.t1	ncRNA	lifted_all.ident
WBGene00014026|C17D12.t1	ncRNA	lifted_all.ident
WBGene00014126|C17D12.t2	ncRNA	lifted_all.ident
WBGene00014147|C17D12.t3	ncRNA	lifted_all.ident
WBGene00014263|C18D4.t1	ncRNA	lifted_all.ident
WBGene00014264|C24H11.t1	ncRNA	lifted_all.ident
WBGene00014265|C26G2.t1	ncRNA	lifted_all.ident
WBGene00014266|C28A5.7	ncRNA	lifted_all.ident
WBGene00014267|C28A5.t1	ncRNA	lifted_all.ident
WBGene00014268|C28A5.t2	ncRNA	lifted_all.ident
WBGene00014269|C28A5.t3	ncRNA	lifted_no.ident
WBGene00014270|C29F4.t1	ncRNA	lifted_all.ident
WBGene00014271|C29F7.t1	ncRNA	lifted_all.ident
WBGene00014272|C29F7.t2	ncRNA	lifted_all.ident
WBGene00014273|C29F7.t3	ncRNA	lifted_all.ident
WBGene00014274|C31E10.t1	ncRNA	lifted_all.ident
WBGene00014275|C33G3.t2	ncRNA	lifted_all.ident
WBGene00014276|C34E11.t1	ncRNA	lifted_all.ident
WBGene00014277|C35D6.6	ncRNA	lifted_all.ident
WBGene00014278|C35D6.7	ncRNA	lifted_all.ident
WBGene00014279|C36F7.t1	ncRNA	lifted_all.ident
WBGene00014280|C36F7.t2	ncRNA	lifted_all.ident
WBGene00014281|C36F7.t3	ncRNA	lifted_all.ident
WBGene00014282|C37A5.t1	ncRNA	lifted_all.ident
WBGene00014283|C38C6.t1	ncRNA	lifted_all.ident
WBGene00014284|C40C9.t1	ncRNA	lifted_all.ident
WBGene00014285|C40C9.t2	ncRNA	lifted_all.ident
WBGene00014286|C40H5.t1	ncRNA	lifted_all.ident
WBGene00014287|C47E8.t1	ncRNA	lifted_all.ident
WBGene00014288|C47F8.9	ncRNA	lifted_all.ident
WBGene00014289|C49F5.t1	ncRNA	lifted_all.ident
WBGene00014290|C51F7.3	ncRNA	lifted_all.ident
WBGene00014291|C52E4.8	ncRNA	lifted_all.ident
WBGene00014292|C52G5.t1	ncRNA	lifted_all.ident
WBGene00014293|C53B4.9	ncRNA	lifted_all.ident
WBGene00014295|C53C7.t1	ncRNA	lifted_all.ident
WBGene00014296|C53C7.t2	ncRNA	lifted_all.ident
WBGene00014297|C53C7.t3	ncRNA	lifted_all.ident
WBGene00014298|C53D6.t1	ncRNA	lifted_all.ident
WBGene00014299|C56G7.t1	ncRNA	lifted_all.ident
WBGene00014301|DY3.t2	ncRNA	lifted_all.ident
WBGene00014302|F02D10.t1|rte-5	ncRNA	lifted_all.ident
WBGene00014303|F02D10.t2	ncRNA	lifted_all.ident
WBGene00014304|F02D10.t3	ncRNA	lifted_all.ident
WBGene00014305|F02H6.t1	ncRNA	lifted_all.ident
WBGene00014306|F07C6.5	ncRNA	lifted_all.ident
WBGene00014310|F08G2.9	ncRNA	lifted_all.ident
WBGene00014311|F08G2.10	ncRNA	lifted_all.ident
WBGene00014312|F08G2.11	ncRNA	lifted_all.ident
WBGene00014313|F08G5.t1	ncRNA	lifted_all.ident
WBGene00014314|F08G5.t2	ncRNA	lifted_all.ident
WBGene00014315|F08G5.t3	ncRNA	lifted_all.ident
WBGene00014316|F08H9.10	ncRNA	lifted_all.ident
WBGene00014317|F08H9.11	ncRNA	lifted_all.ident
WBGene00014318|F09B9.t1	ncRNA	lifted_all.ident
WBGene00014319|F09B9.t2	ncRNA	lifted_all.ident
WBGene00014320|F11A1.t1	ncRNA	lifted_all.ident
WBGene00014321|F11A1.t2	ncRNA	lifted_all.ident
WBGene00014322|F11A5.14	ncRNA	lifted_all.ident
WBGene00014323|F11A5.t1	ncRNA	lifted_all.ident
WBGene00014324|F13G11.t1	ncRNA	lifted_all.ident
WBGene00014325|F14B4.t1	ncRNA	lifted_all.ident
WBGene00014326|F14B4.t2	ncRNA	lifted_all.ident
WBGene00014327|F14B6.t1	ncRNA	lifted_all.ident
WBGene00014328|F14B6.t2	ncRNA	lifted_all.ident
WBGene00014329|F14F7.t1	ncRNA	lifted_all.ident
WBGene00014330|F14H8.t1	ncRNA	lifted_all.ident
WBGene00014331|F15B9.t1	ncRNA	lifted_all.ident
WBGene00014332|F15D3.t1	ncRNA	lifted_all.ident
WBGene00014333|F15G9.t1	ncRNA	lifted_all.ident
WBGene00014334|F15G9.t2	ncRNA	lifted_all.ident
WBGene00014335|F15H9.5	ncRNA	lifted_all.ident
WBGene00014336|F15H9.6	ncRNA	lifted_all.ident
WBGene00014337|F15H9.t1	ncRNA	lifted_all.ident
WBGene00014338|F17A2.t1	ncRNA	lifted_all.ident
WBGene00014339|F17H10.t1	ncRNA	lifted_all.ident
WBGene00014340|F19H6.t1	ncRNA	lifted_all.ident
WBGene00014341|F21A3.t1	ncRNA	lifted_all.ident
WBGene00014342|F21A3.t2	ncRNA	lifted_all.ident
WBGene00014343|F21C3.t1	ncRNA	lifted_all.ident
WBGene00014344|F22G12.t1	ncRNA	lifted_all.ident
WBGene00014345|F22G12.t2	ncRNA	lifted_all.ident
WBGene00014346|F23A7.t1	ncRNA	lifted_all.ident
WBGene00014347|F23D12.t1	ncRNA	lifted_all.ident
WBGene00014348|F23D12.t2	ncRNA	lifted_all.ident
WBGene00014349|F27D4.t1	ncRNA	lifted_all.ident
WBGene00014350|F28F8.t1	ncRNA	lifted_all.ident
WBGene00014351|F28F8.t2	ncRNA	lifted_all.ident
WBGene00014352|F28F8.t3	ncRNA	lifted_all.ident
WBGene00014353|F28F8.t4	ncRNA	lifted_all.ident
WBGene00014354|F28H6.t1	ncRNA	lifted_all.ident
WBGene00014355|F28H6.t2	ncRNA	lifted_all.ident
WBGene00014356|F28H6.t3	ncRNA	no.lift
WBGene00014357|F28H6.t4	ncRNA	lifted_all.ident
WBGene00014358|F28H6.t5	ncRNA	lifted_all.ident
WBGene00014359|F28H6.t6	ncRNA	lifted_all.ident
WBGene00014360|F28H6.t7	ncRNA	no.lift
WBGene00014361|F31B12.t1	ncRNA	lifted_all.ident
WBGene00014362|F31E9.t1	ncRNA	lifted_all.ident
WBGene00014363|F32B4.t1	ncRNA	lifted_all.ident
WBGene00014364|F34H10.t1	ncRNA	lifted_all.ident
WBGene00014365|F35H8.t1	ncRNA	lifted_all.ident
WBGene00014366|F38E11.10	ncRNA	lifted_all.ident
WBGene00014367|F38E11.11	ncRNA	lifted_all.ident
WBGene00014368|F39B1.t1	ncRNA	lifted_all.ident
WBGene00014369|F39B1.t2	ncRNA	lifted_all.ident
WBGene00014370|F40G12.13	ncRNA	lifted_all.ident
WBGene00014371|F40G12.14	ncRNA	lifted_all.ident
WBGene00014372|F42D1.t1	ncRNA	lifted_all.ident
WBGene00014373|F42F12.t1	ncRNA	lifted_all.ident
WBGene00014374|F42G10.t1	ncRNA	lifted_all.ident
WBGene00014376|F45G2.t1	ncRNA	lifted_all.ident
WBGene00014377|F47A4.t1	ncRNA	lifted_all.ident
WBGene00014378|F49C5.t1	ncRNA	lifted_all.ident
WBGene00014379|F49C5.t2	ncRNA	lifted_all.ident
WBGene00014380|F49C5.t3	ncRNA	lifted_all.ident
WBGene00014381|F49C5.t4	ncRNA	lifted_all.ident
WBGene00014382|F49E2.t1	ncRNA	lifted_all.ident
WBGene00014384|F52E10.t1	ncRNA	lifted_all.ident
WBGene00014385|F52E10.t2	ncRNA	lifted_all.ident
WBGene00014386|F52E10.t3	ncRNA	lifted_all.ident
WBGene00014387|F52E10.t4	ncRNA	lifted_all.ident
WBGene00014388|F52E10.t5	ncRNA	lifted_all.ident
WBGene00014389|F53B6.t1	ncRNA	lifted_all.ident
WBGene00014390|F53F8.t1	ncRNA	lifted_all.ident
WBGene00014391|F54B11.12|mir-392	ncRNA	lifted_all.ident
WBGene00014392|F54C8.8	ncRNA	lifted_all.ident
WBGene00014393|F54C8.9	ncRNA	lifted_all.ident
WBGene00014394|F54C8.10	ncRNA	lifted_all.ident
WBGene00014395|F54F7.t1	ncRNA	lifted_all.ident
WBGene00014396|F54F7.t2	ncRNA	lifted_all.ident
WBGene00014397|F55A11.10	ncRNA	lifted_all.ident
WBGene00014398|F55F3.t1	ncRNA	lifted_all.ident
WBGene00014399|F55F3.t2	ncRNA	lifted_all.ident
WBGene00014400|F55G7.t1	ncRNA	lifted_all.ident
WBGene00014401|F55G7.t2	ncRNA	lifted_all.ident
WBGene00014402|F56F3.t1	ncRNA	lifted_all.ident
WBGene00014403|F56H6.14	ncRNA	lifted_all.ident
WBGene00014404|F56H6.15	ncRNA	lifted_all.ident
WBGene00014405|F56H6.16	ncRNA	lifted_all.ident
WBGene00014406|F57F5.t1	ncRNA	lifted_all.ident
WBGene00014407|F57G8.t1	ncRNA	lifted_all.ident
WBGene00014408|F57G8.t2	ncRNA	lifted_all.ident
WBGene00014409|F57G8.t3	ncRNA	lifted_all.ident
WBGene00014410|F57G8.t4	ncRNA	lifted_all.ident
WBGene00014411|F58D5.t1	ncRNA	lifted_all.ident
WBGene00014413|H06A10.t1	ncRNA	lifted_all.ident
WBGene00014414|K01A6.t1	ncRNA	lifted_all.ident
WBGene00014415|K01A11.t1	ncRNA	lifted_all.ident
WBGene00014416|K02A4.t1	ncRNA	lifted_all.ident
WBGene00014417|K02A4.t2	ncRNA	lifted_all.ident
WBGene00014418|K02B12.t1	ncRNA	lifted_all.ident
WBGene00014419|K02E2.t1	ncRNA	lifted_all.ident
WBGene00014420|K02E11.t1	ncRNA	lifted_all.ident
WBGene00014421|K03B8.10	ncRNA	lifted_all.ident
WBGene00014422|K03B8.t1	ncRNA	lifted_all.ident
WBGene00014423|K06A4.t1	ncRNA	lifted_all.ident
WBGene00014424|K07A1.t1	ncRNA	lifted_all.ident
WBGene00014425|K07C10.2	ncRNA	lifted_all.ident
WBGene00014426|K07C10.t1	ncRNA	lifted_all.ident
WBGene00014427|K08E7.t1	ncRNA	lifted_all.ident
WBGene00014428|K08H2.t1	ncRNA	lifted_all.ident
WBGene00014429|K09A11.t1	ncRNA	lifted_all.ident
WBGene00014430|K09B11.11	ncRNA	lifted_all.ident
WBGene00014431|K09B11.12	ncRNA	lifted_all.ident
WBGene00014432|K09B11.13	ncRNA	lifted_all.ident
WBGene00014433|K09B11.14	ncRNA	lifted_all.ident
WBGene00014434|K09B11.15	ncRNA	lifted_all.ident
WBGene00014435|K09B11.16	ncRNA	lifted_all.ident
WBGene00014436|K09C8.t1	ncRNA	lifted_all.ident
WBGene00014437|K10C8.t1	ncRNA	lifted_all.ident
WBGene00014438|K11E4.t1	ncRNA	lifted_all.ident
WBGene00014439|K11E4.t2	ncRNA	lifted_all.ident
WBGene00014440|K11E4.t3	ncRNA	lifted_all.ident
WBGene00014441|K11E4.t4	ncRNA	lifted_all.ident
WBGene00014442|K11E4.t5	ncRNA	lifted_all.ident
WBGene00014443|K11E4.t6	ncRNA	lifted_all.ident
WBGene00014444|K11H3.t1	ncRNA	lifted_all.ident
WBGene00014445|K11H3.t2	ncRNA	lifted_all.ident
WBGene00014446|M01E5.t1	ncRNA	lifted_all.ident
WBGene00014447|M106.6	ncRNA	lifted_all.ident
WBGene00014448|M163.t1	ncRNA	lifted_all.ident
WBGene00014449|M163.t2	ncRNA	lifted_all.ident
WBGene00014450|MTCE.1	ncRNA	lifted_all.ident
WBGene00014451|MTCE.2	ncRNA	lifted_all.ident
WBGene00014452|MTCE.5	ncRNA	lifted_all.ident
WBGene00014453|MTCE.6	ncRNA	lifted_all.ident
WBGene00014454|MTCE.7	ncRNA	lifted_all.ident
WBGene00014455|MTCE.8	ncRNA	lifted_all.ident
WBGene00014456|MTCE.9	ncRNA	lifted_all.ident
WBGene00014457|MTCE.10	ncRNA	lifted_all.ident
WBGene00014458|MTCE.13	ncRNA	lifted_all.ident
WBGene00014459|MTCE.14	ncRNA	lifted_all.ident
WBGene00014460|MTCE.15	ncRNA	lifted_all.ident
WBGene00014461|MTCE.17	ncRNA	lifted_all.ident
WBGene00014462|MTCE.18	ncRNA	lifted_all.ident
WBGene00014463|MTCE.19	ncRNA	lifted_all.ident
WBGene00014464|MTCE.20	ncRNA	lifted_all.ident
WBGene00014465|MTCE.22	ncRNA	lifted_all.ident
WBGene00014466|MTCE.24	ncRNA	lifted_all.ident
WBGene00014467|MTCE.27	ncRNA	lifted_all.ident
WBGene00014468|MTCE.28	ncRNA	lifted_all.ident
WBGene00014469|MTCE.29	ncRNA	lifted_all.ident
WBGene00014470|MTCE.30	ncRNA	lifted_all.ident
WBGene00014471|MTCE.32	ncRNA	lifted_all.ident
WBGene00014472|MTCE.33	ncRNA	lifted_all.ident
WBGene00014473|MTCE.36	ncRNA	lifted_all.ident
WBGene00014474|R01H5.t1	ncRNA	lifted_all.ident
WBGene00014475|R03E1.t1	ncRNA	lifted_all.ident
WBGene00014476|R03E1.t2	ncRNA	lifted_all.ident
WBGene00014477|R04D3.t1	ncRNA	lifted_all.ident
WBGene00014478|R04D3.t2	ncRNA	lifted_all.ident
WBGene00014479|R04D3.t3	ncRNA	lifted_all.ident
WBGene00014480|R04D3.t4	ncRNA	lifted_all.ident
WBGene00014481|R04D3.t5	ncRNA	lifted_all.ident
WBGene00014482|R04F11.t1	ncRNA	lifted_all.ident
WBGene00014483|R05D7.6	ncRNA	lifted_all.ident
WBGene00014484|R07E5.16	ncRNA	lifted_all.ident
WBGene00014485|R09E10.t1	ncRNA	lifted_all.ident
WBGene00014486|R11.t1	ncRNA	lifted_all.ident
WBGene00014487|R11.t2	ncRNA	lifted_all.ident
WBGene00014488|R11.t3	ncRNA	lifted_all.ident
WBGene00014489|R11.t4	ncRNA	lifted_all.ident
WBGene00014490|R11G10.t1	ncRNA	lifted_all.ident
WBGene00014491|R11G10.t2	ncRNA	lifted_all.ident
WBGene00014492|R166.6	ncRNA	lifted_all.ident
WBGene00014493|T01B4.t1	ncRNA	lifted_all.ident
WBGene00014494|T01B4.t2	ncRNA	lifted_all.ident
WBGene00014495|T01B4.t3	ncRNA	lifted_all.ident
WBGene00014496|T01B4.t4	ncRNA	lifted_all.ident
WBGene00014497|T01C1.t1	ncRNA	lifted_all.ident
WBGene00014498|T02G6.t1	ncRNA	lifted_all.ident
WBGene00014499|T03E6.t1	ncRNA	lifted_all.ident
WBGene00014500|T04D3.t1	ncRNA	lifted_all.ident
WBGene00014501|T04D3.t2	ncRNA	lifted_all.ident
WBGene00014502|T04D3.t3	ncRNA	lifted_all.ident
WBGene00014503|T04D3.t4	ncRNA	lifted_all.ident
WBGene00014504|T04F8.t1	ncRNA	lifted_all.ident
WBGene00014505|T05E11.9	ncRNA	lifted_all.ident
WBGene00014506|T06D8.11	ncRNA	lifted_all.ident
WBGene00014507|T06H11.t1	ncRNA	lifted_all.ident
WBGene00014508|T06H11.t2	ncRNA	lifted_all.ident
WBGene00014509|T06H11.t3	ncRNA	lifted_all.ident
WBGene00014510|T07D10.t1	ncRNA	lifted_all.ident
WBGene00014511|T08G5.11	ncRNA	lifted_all.ident
WBGene00014512|T09F5.t1	ncRNA	lifted_all.ident
WBGene00014513|T10B9.t1	ncRNA	lifted_all.ident
WBGene00014514|T10B10.t1	ncRNA	lifted_all.ident
WBGene00014515|T10B10.t2	ncRNA	lifted_all.ident
WBGene00014517|T11F9.15	ncRNA	lifted_all.ident
WBGene00014518|T11F9.16	ncRNA	lifted_all.ident
WBGene00014519|T14G8.t1	ncRNA	lifted_all.ident
WBGene00014520|T18D3.t1	ncRNA	lifted_all.ident
WBGene00014521|T19C4.t1	ncRNA	lifted_all.ident
WBGene00014522|T20D3.12	ncRNA	lifted_all.ident
WBGene00014523|T20D3.13	ncRNA	lifted_all.ident
WBGene00014524|T21B4.t1	ncRNA	lifted_all.ident
WBGene00014525|T22A3.t1	ncRNA	lifted_all.ident
WBGene00014526|T22A3.t2	ncRNA	lifted_all.ident
WBGene00014527|T22A3.t3	ncRNA	lifted_all.ident
WBGene00014528|T22A3.t4	ncRNA	lifted_all.ident
WBGene00014529|T22C1.t1	ncRNA	lifted_all.ident
WBGene00014530|T22C8.t1	ncRNA	lifted_all.ident
WBGene00014531|T23F1.t1	ncRNA	lifted_all.ident
WBGene00014532|T23F1.t2	ncRNA	lifted_all.ident
WBGene00014533|T23H4.t1	ncRNA	lifted_all.ident
WBGene00014534|T27D12.5|mir-355	ncRNA	lifted_all.ident
WBGene00014535|T28D6.t1	ncRNA	lifted_all.ident
WBGene00014536|T28D6.t2	ncRNA	lifted_all.ident
WBGene00014537|VK10D6R.t1	ncRNA	lifted_all.ident
WBGene00014538|W02H3.t1	ncRNA	lifted_all.ident
WBGene00014539|W03C9.t1	ncRNA	lifted_all.ident
WBGene00014540|W03G11.t1	ncRNA	lifted_all.ident
WBGene00014541|W04D2.7	ncRNA	lifted_all.ident
WBGene00014542|W04G5.11	ncRNA	lifted_all.ident
WBGene00014543|W05B2.8	ncRNA	lifted_all.ident
WBGene00014544|W05B2.t1	ncRNA	lifted_all.ident
WBGene00014545|W06D4.t1	ncRNA	lifted_all.ident
WBGene00014546|W06G6.t1	ncRNA	lifted_all.ident
WBGene00014547|W06G6.t2	ncRNA	lifted_all.ident
WBGene00014548|W06G6.t3	ncRNA	lifted_all.ident
WBGene00014549|W07G1.8	ncRNA	lifted_all.ident
WBGene00014550|W07G1.9	ncRNA	lifted_all.ident
WBGene00014551|W07G4.t1	ncRNA	lifted_all.ident
WBGene00014552|W09D6.t1	ncRNA	lifted_all.ident
WBGene00014553|W09D6.t2	ncRNA	lifted_all.ident
WBGene00014554|Y7A5A.t1	ncRNA	lifted_all.ident
WBGene00014555|Y7A5A.t2	ncRNA	lifted_all.ident
WBGene00014556|Y7A5A.t3	ncRNA	lifted_all.ident
WBGene00014557|Y7A5A.t4	ncRNA	lifted_all.ident
WBGene00014558|Y7A5A.t5	ncRNA	lifted_all.ident
WBGene00014559|Y7A9D.t1	ncRNA	lifted_all.ident
WBGene00014560|Y7A9D.t2	ncRNA	lifted_all.ident
WBGene00014561|Y7A9D.t3	ncRNA	lifted_all.ident
WBGene00014563|Y37A1B.t1	ncRNA	lifted_all.ident
WBGene00014564|Y38E10A.t1	ncRNA	lifted_all.ident
WBGene00014565|Y38H6A.t1	ncRNA	lifted_all.ident
WBGene00014566|Y39A1A.t1	ncRNA	lifted_all.ident
WBGene00014567|Y39B6A.t9	ncRNA	lifted_all.ident
WBGene00014568|Y39B6A.t10	ncRNA	lifted_all.ident
WBGene00014570|Y40H7A.t1	ncRNA	lifted_all.ident
WBGene00014571|Y40H7A.t2	ncRNA	lifted_all.ident
WBGene00014572|Y43D4A.t1	ncRNA	lifted_all.ident
WBGene00014573|Y43D4A.t2	ncRNA	lifted_all.ident
WBGene00014574|Y43F4A.t1	ncRNA	lifted_all.ident
WBGene00014575|Y43F4A.t2	ncRNA	lifted_all.ident
WBGene00014577|Y47H9A.2	ncRNA	lifted_all.ident
WBGene00014578|Y49E10.t1	ncRNA	lifted_all.ident
WBGene00014579|Y51A2B.t1	ncRNA	lifted_all.ident
WBGene00014580|Y51H4A.t2	ncRNA	lifted_all.ident
WBGene00014581|Y51H4A.t3	ncRNA	lifted_all.ident
WBGene00014582|Y51H4A.t4	ncRNA	lifted_all.ident
WBGene00014583|Y51H4A.t5	ncRNA	lifted_all.ident
WBGene00014584|Y51H4A.t6	ncRNA	lifted_all.ident
WBGene00014585|Y53C10A.t1	ncRNA	lifted_all.ident
WBGene00014586|Y53C10A.t2|rte-2	ncRNA	lifted_all.ident
WBGene00014587|Y53C10A.t3	ncRNA	lifted_all.ident
WBGene00014588|Y53C12A.t1	ncRNA	lifted_all.ident
WBGene00014589|Y54G9A.8	ncRNA	lifted_all.ident
WBGene00014590|Y57A10B.t1	ncRNA	lifted_all.ident
WBGene00014591|Y57A10C.t1	ncRNA	lifted_all.ident
WBGene00014592|Y57G11B.t1	ncRNA	lifted_all.ident
WBGene00014593|Y57G11C.35	ncRNA	lifted_all.ident
WBGene00014594|Y57G11C.t1	ncRNA	lifted_all.ident
WBGene00014595|Y59A8B.t3	ncRNA	lifted_all.ident
WBGene00014596|Y65A5A.t1	ncRNA	lifted_all.ident
WBGene00014597|Y65A5A.t2	ncRNA	lifted_all.ident
WBGene00014598|Y65A5A.t3	ncRNA	lifted_all.ident
WBGene00014599|Y65A5A.t4	ncRNA	lifted_all.ident
WBGene00014600|Y66D12A.t1	ncRNA	lifted_all.ident
WBGene00014601|Y70C5A.t1	ncRNA	lifted_all.ident
WBGene00014602|Y73F8A.t1	ncRNA	lifted_all.ident
WBGene00014603|Y73F8A.t3	ncRNA	lifted_all.ident
WBGene00014604|Y73F8A.t4	ncRNA	lifted_all.ident
WBGene00014605|Y95D11A.t1	ncRNA	lifted_all.ident
WBGene00014606|Y105C5A.t1	ncRNA	lifted_all.ident
WBGene00014607|Y105C5A.t2	ncRNA	lifted_all.ident
WBGene00014608|Y105C5B.t1	ncRNA	lifted_all.ident
WBGene00014609|Y105C5B.t2	ncRNA	lifted_all.ident
WBGene00014610|Y105C5B.t3	ncRNA	lifted_all.ident
WBGene00014611|Y105C5B.t4	ncRNA	lifted_all.ident
WBGene00014612|Y105E8A.31|mir-354	ncRNA	lifted_all.ident
WBGene00014614|Y113G7B.t1	ncRNA	lifted_all.ident
WBGene00014616|Y116F11A.t1	ncRNA	lifted_all.ident
WBGene00014617|ZC412.t1	ncRNA	lifted_all.ident
WBGene00014618|ZC412.t2	ncRNA	lifted_all.ident
WBGene00014619|ZC455.t1	ncRNA	lifted_all.ident
WBGene00014620|ZK39.t1	ncRNA	lifted_all.ident
WBGene00014621|ZK218.12|rrn-4.1	ncRNA	lifted_all.ident
WBGene00014622|ZK218.13|sls-1.10	ncRNA	lifted_all.ident
WBGene00014623|ZK262.t1	ncRNA	lifted_all.ident
WBGene00014624|ZK507.t1	ncRNA	lifted_all.ident
WBGene00014625|ZK617.t1	ncRNA	lifted_all.ident
WBGene00014626|ZK678.t1	ncRNA	lifted_all.ident
WBGene00014627|ZK678.t2	ncRNA	lifted_no.ident
WBGene00014628|ZK678.t3	ncRNA	lifted_all.ident
WBGene00014629|ZK678.t5	ncRNA	lifted_all.ident
WBGene00014630|ZK822.t1	ncRNA	lifted_all.ident
WBGene00014631|ZK897.2	ncRNA	lifted_all.ident
WBGene00014632|ZK897.3	ncRNA	lifted_all.ident
WBGene00014633|ZK897.4	ncRNA	lifted_all.ident
WBGene00014634|ZK899.t1	ncRNA	lifted_all.ident
WBGene00014635|ZK970.t1	ncRNA	lifted_all.ident
WBGene00014636|ZK970.t2	ncRNA	lifted_all.ident
WBGene00014637|ZK970.t3	ncRNA	lifted_all.ident
WBGene00014638|ZK970.t4	ncRNA	lifted_all.ident
WBGene00014639|ZK1010.t1	ncRNA	lifted_all.ident
WBGene00014640|ZK1067.t1	ncRNA	lifted_all.ident
WBGene00014836|T09F5.12	ncRNA	lifted_all.ident
WBGene00015058|B0222.10	ncRNA	lifted_all.ident
WBGene00016553|C40A11.10|mir-8199	ncRNA	lifted_all.ident
WBGene00017941|F31A9.2	ncRNA	lifted_all.ident
WBGene00019193|H12I13.5	ncRNA	lifted_all.ident
WBGene00020944|W02D7.9	ncRNA	lifted_all.ident
WBGene00021013|W03G1.8	ncRNA	lifted_all.ident
WBGene00021050|W05H9.3	ncRNA	lifted_all.ident
WBGene00021100|W08F4.11	ncRNA	lifted_all.ident
WBGene00022308|Y77E11A.3	ncRNA	lifted_all.ident
WBGene00022894|B0212.t1	ncRNA	lifted_all.ident
WBGene00022895|B0213.18	ncRNA	lifted_all.ident
WBGene00022896|B0228.t1	ncRNA	lifted_all.ident
WBGene00022897|B0244.t1	ncRNA	lifted_all.ident
WBGene00022898|B0244.t2	ncRNA	lifted_all.ident
WBGene00022899|B0244.t3	ncRNA	lifted_all.ident
WBGene00022900|B0344.t1	ncRNA	lifted_all.ident
WBGene00022901|B0344.t2	ncRNA	lifted_no.ident
WBGene00022902|B0344.t3	ncRNA	lifted_all.ident
WBGene00022903|B0350.t1	ncRNA	lifted_all.ident
WBGene00022904|C01B12.9	ncRNA	lifted_all.ident
WBGene00022905|C02F12.t1	ncRNA	lifted_all.ident
WBGene00022906|C03F11.t1	ncRNA	lifted_all.ident
WBGene00022907|C04A2.t1	ncRNA	lifted_all.ident
WBGene00022908|C04E7.t1	ncRNA	lifted_all.ident
WBGene00022909|C04F2.t1	ncRNA	lifted_all.ident
WBGene00022910|C05D2.11	ncRNA	lifted_all.ident
WBGene00022911|C05G6.t1	ncRNA	lifted_all.ident
WBGene00022912|C06E4.t1	ncRNA	lifted_all.ident
WBGene00022913|C06G1.t1	ncRNA	lifted_all.ident
WBGene00022914|C06G1.t2	ncRNA	lifted_all.ident
WBGene00022915|C06G1.t3	ncRNA	lifted_all.ident
WBGene00022916|C06G1.t4	ncRNA	lifted_all.ident
WBGene00022917|C06G4.t1	ncRNA	lifted_all.ident
WBGene00022918|C09B7.3	ncRNA	lifted_all.ident
WBGene00022919|C09B7.4	ncRNA	lifted_all.ident
WBGene00022920|C09B9.t1	ncRNA	lifted_all.ident
WBGene00022921|C10G8.t1	ncRNA	lifted_all.ident
WBGene00022922|C12D12.7	ncRNA	lifted_all.ident
WBGene00022923|C14B9.t1	ncRNA	lifted_all.ident
WBGene00022924|C14B9.t2	ncRNA	lifted_all.ident
WBGene00022925|C14F11.t1	ncRNA	lifted_all.ident
WBGene00022926|C16B8.5	ncRNA	lifted_all.ident
WBGene00022927|C16B8.t1	ncRNA	lifted_all.ident
WBGene00022928|C16B8.t2	ncRNA	lifted_all.ident
WBGene00022929|C16B8.t3	ncRNA	lifted_all.ident
WBGene00022930|C16C8.t1	ncRNA	lifted_all.ident
WBGene00022931|C16C8.t2	ncRNA	lifted_all.ident
WBGene00022932|C16D9.10	ncRNA	lifted_all.ident
WBGene00022933|C16D9.t2	ncRNA	lifted_all.ident
WBGene00022934|C16D9.t3	ncRNA	lifted_all.ident
WBGene00022935|C16D9.t4	ncRNA	lifted_all.ident
WBGene00022936|C16H3.t1	ncRNA	lifted_all.ident
WBGene00022937|C16H3.t2	ncRNA	lifted_all.ident
WBGene00022938|C18A11.t1	ncRNA	lifted_all.ident
WBGene00022939|C18A11.t2	ncRNA	lifted_all.ident
WBGene00022940|C23H5.10	ncRNA	lifted_all.ident
WBGene00022941|C25F6.t1	ncRNA	lifted_all.ident
WBGene00022942|C25F6.t2	ncRNA	lifted_all.ident
WBGene00022943|C25F6.t3	ncRNA	lifted_all.ident
WBGene00022944|C25F6.t4	ncRNA	lifted_all.ident
WBGene00022945|C27A2.t1	ncRNA	lifted_all.ident
WBGene00022946|C27A12.t1	ncRNA	lifted_all.ident
WBGene00022947|C28G1.t1	ncRNA	lifted_all.ident
WBGene00022948|C28G1.t2	ncRNA	lifted_all.ident
WBGene00022949|C28G1.t3	ncRNA	lifted_all.ident
WBGene00022950|C28G1.t4	ncRNA	lifted_all.ident
WBGene00022951|C30E1.9	ncRNA	lifted_all.ident
WBGene00022952|C30E1.t1	ncRNA	lifted_all.ident
WBGene00022953|C35E7.t1	ncRNA	lifted_all.ident
WBGene00022954|C36C9.t2	ncRNA	lifted_all.ident
WBGene00022955|C37A2.t1	ncRNA	lifted_all.ident
WBGene00022956|C39D10.t1	ncRNA	lifted_all.ident
WBGene00022957|C39D10.t2	ncRNA	lifted_all.ident
WBGene00022958|C42D8.t1	ncRNA	lifted_all.ident
WBGene00022959|C43G2.t1	ncRNA	lifted_all.ident
WBGene00022960|C43G2.t2	ncRNA	lifted_all.ident
WBGene00022961|C44B7.t1	ncRNA	lifted_all.ident
WBGene00022962|C48C5.t1	ncRNA	lifted_all.ident
WBGene00022963|C48C5.t2	ncRNA	lifted_all.ident
WBGene00022964|C48C5.t3	ncRNA	lifted_all.ident
WBGene00022965|C48C5.t4	ncRNA	lifted_all.ident
WBGene00022966|C52E12.t2	ncRNA	lifted_all.ident
WBGene00022967|C52E12.t3	ncRNA	lifted_all.ident
WBGene00022968|C55F2.3	ncRNA	lifted_all.ident
WBGene00022969|C56G3.t1	ncRNA	lifted_all.ident
WBGene00022970|CD4.10	ncRNA	lifted_all.ident
WBGene00022971|D1009.t1	ncRNA	lifted_all.ident
WBGene00022972|D1009.t2	ncRNA	lifted_all.ident
WBGene00022973|E01H11.t1	ncRNA	lifted_all.ident
WBGene00022974|E03E2.t1	ncRNA	lifted_all.ident
WBGene00022975|E03E2.t2	ncRNA	lifted_all.ident
WBGene00022976|E03E2.t3	ncRNA	lifted_all.ident
WBGene00022977|F01G12.t1	ncRNA	lifted_all.ident
WBGene00022978|F02E11.t1	ncRNA	lifted_all.ident
WBGene00022979|F08F1.t1	ncRNA	lifted_all.ident
WBGene00022980|F08F1.t2	ncRNA	lifted_all.ident
WBGene00022981|F08F1.t3	ncRNA	lifted_all.ident
WBGene00022982|F09E10.10	ncRNA	lifted_all.ident
WBGene00022983|F10C1.t1	ncRNA	lifted_all.ident
WBGene00022984|F10C1.t2	ncRNA	lifted_all.ident
WBGene00022985|F11H8.t1	ncRNA	lifted_all.ident
WBGene00022986|F12D9.t1	ncRNA	lifted_all.ident
WBGene00022987|F12D9.t2	ncRNA	lifted_all.ident
WBGene00022988|F12D9.t3	ncRNA	lifted_all.ident
WBGene00022989|F12D9.t4	ncRNA	lifted_all.ident
WBGene00022990|F12D9.t5	ncRNA	lifted_all.ident
WBGene00022991|F12D9.t6	ncRNA	lifted_all.ident
WBGene00022992|F14B8.t1	ncRNA	lifted_all.ident
WBGene00022993|F15A8.t1	ncRNA	lifted_all.ident
WBGene00022994|F15A8.t2	ncRNA	lifted_all.ident
WBGene00022995|F18C5.t1	ncRNA	lifted_all.ident
WBGene00022996|F18G5.t1	ncRNA	lifted_all.ident
WBGene00022997|F18G5.t2	ncRNA	lifted_all.ident
WBGene00022998|F22B7.t1	ncRNA	lifted_all.ident
WBGene00022999|F22B7.t2	ncRNA	lifted_all.ident
WBGene00023000|F22B7.t3	ncRNA	lifted_all.ident
WBGene00023001|F22B7.t4	ncRNA	lifted_all.ident
WBGene00023002|F22B7.t5	ncRNA	lifted_all.ident
WBGene00023003|F22F1.t1	ncRNA	lifted_all.ident
WBGene00023004|F22F1.t2	ncRNA	lifted_all.ident
WBGene00023005|F22F1.t3	ncRNA	lifted_all.ident
WBGene00023006|F22F1.t4	ncRNA	lifted_all.ident
WBGene00023007|F22F1.t5	ncRNA	lifted_all.ident
WBGene00023008|F22F1.t6	ncRNA	lifted_all.ident
WBGene00023009|F22F1.t7	ncRNA	lifted_all.ident
WBGene00023010|F22F1.t8	ncRNA	lifted_all.ident
WBGene00023011|F22F1.t9	ncRNA	lifted_all.ident
WBGene00023012|F22H10.t1	ncRNA	lifted_all.ident
WBGene00023013|F25F6.t1	ncRNA	lifted_all.ident
WBGene00023014|F25F6.t2	ncRNA	lifted_all.ident
WBGene00023015|F27B10.t1	ncRNA	lifted_all.ident
WBGene00023016|F27D9.t1|rte-3	ncRNA	lifted_all.ident
WBGene00023017|F27E11.t1	ncRNA	lifted_all.ident
WBGene00023018|F28F5.t1	ncRNA	lifted_all.ident
WBGene00023019|F29C4.t1	ncRNA	lifted_all.ident
WBGene00023020|F30H5.4	ncRNA	lifted_all.ident
WBGene00023021|F32A5.9	ncRNA	lifted_all.ident
WBGene00023022|F32A6.t1	ncRNA	lifted_all.ident
WBGene00023023|F33D11.t1	ncRNA	lifted_all.ident
WBGene00023024|F33D11.t2	ncRNA	lifted_all.ident
WBGene00023025|F33G12.t1	ncRNA	lifted_all.ident
WBGene00023026|F35A5.t1	ncRNA	lifted_all.ident
WBGene00023027|F35H10.12	ncRNA	lifted_all.ident
WBGene00023028|F36D4.t1	ncRNA	lifted_all.ident
WBGene00023029|F36D4.t2	ncRNA	lifted_all.ident
WBGene00023031|F37A4.t1	ncRNA	lifted_all.ident
WBGene00023032|F38E9.t1	ncRNA	lifted_all.ident
WBGene00023033|F38E9.t2	ncRNA	lifted_all.ident
WBGene00023034|F38G1.t1	ncRNA	lifted_all.ident
WBGene00023035|F38G1.t2	ncRNA	lifted_all.ident
WBGene00023037|F40H6.t1	ncRNA	lifted_all.ident
WBGene00023038|F41A4.t1	ncRNA	lifted_all.ident
WBGene00023040|F41D9.t1	ncRNA	lifted_all.ident
WBGene00023041|F41D9.t2	ncRNA	lifted_all.ident
WBGene00023042|F41D9.t3	ncRNA	lifted_all.ident
WBGene00023043|F41D9.t4	ncRNA	lifted_all.ident
WBGene00023044|F42A10.t1	ncRNA	lifted_all.ident
WBGene00023045|F42A10.t2	ncRNA	lifted_all.ident
WBGene00023046|F42H10.t1	ncRNA	lifted_all.ident
WBGene00023047|F43C9.t1	ncRNA	lifted_all.ident
WBGene00023048|F43E12.t1	ncRNA	lifted_all.ident
WBGene00023049|F44A2.t1	ncRNA	lifted_all.ident
WBGene00023050|F46G11.t1	ncRNA	lifted_all.ident
WBGene00023051|F46G11.t2	ncRNA	lifted_all.ident
WBGene00023052|F47E1.t1	ncRNA	lifted_no.ident
WBGene00023053|F47E1.t2	ncRNA	lifted_all.ident
WBGene00023054|F47E1.t3	ncRNA	lifted_all.ident
WBGene00023055|F47G6.t1	ncRNA	lifted_all.ident
WBGene00023056|F48E3.t1	ncRNA	lifted_all.ident
WBGene00023057|F49D11.t1	ncRNA	lifted_all.ident
WBGene00023058|F49D11.t2	ncRNA	lifted_all.ident
WBGene00023059|F49E7.t1	ncRNA	lifted_all.ident
WBGene00023060|F49E7.t2	ncRNA	lifted_all.ident
WBGene00023061|F49E7.t3	ncRNA	lifted_all.ident
WBGene00023062|F52C9.t1	ncRNA	lifted_all.ident
WBGene00023063|F52H2.t1	ncRNA	lifted_all.ident
WBGene00023064|F52H2.t2	ncRNA	lifted_all.ident
WBGene00023065|F53F10.6	ncRNA	lifted_all.ident
WBGene00023066|F53F10.7	ncRNA	lifted_all.ident
WBGene00023069|F55A4.9|rncs-1	ncRNA	lifted_all.ident
WBGene00023070|F56C3.t1	ncRNA	lifted_all.ident
WBGene00023071|F56C9.12	ncRNA	lifted_all.ident
WBGene00023072|F56F4.t1	ncRNA	lifted_all.ident
WBGene00023073|F56F4.t2	ncRNA	lifted_all.ident
WBGene00023074|F56F10.t1	ncRNA	lifted_all.ident
WBGene00023075|F59C12.t1	ncRNA	lifted_all.ident
WBGene00023076|F59C12.t2	ncRNA	lifted_all.ident
WBGene00023077|F59C12.t3	ncRNA	lifted_all.ident
WBGene00023078|H08J11.t1	ncRNA	lifted_all.ident
WBGene00023079|H08J11.t2	ncRNA	lifted_all.ident
WBGene00023080|H08J11.t3	ncRNA	lifted_all.ident
WBGene00023081|H08J11.t4	ncRNA	lifted_all.ident
WBGene00023082|H08J11.t5	ncRNA	lifted_all.ident
WBGene00023083|H09I01.2	ncRNA	lifted_all.ident
WBGene00023084|H19M22.4	ncRNA	lifted_all.ident
WBGene00023085|H35N09.t1	ncRNA	lifted_all.ident
WBGene00023086|H35N09.t2	ncRNA	lifted_all.ident
WBGene00023087|K01A12.t1	ncRNA	lifted_all.ident
WBGene00023088|K01A12.t2	ncRNA	lifted_all.ident
WBGene00023089|K01A12.t3	ncRNA	lifted_all.ident
WBGene00023090|K01A12.t4	ncRNA	lifted_all.ident
WBGene00023091|K01A12.t5	ncRNA	lifted_all.ident
WBGene00023092|K02D7.t1	ncRNA	lifted_all.ident
WBGene00023093|K03F8.t1	ncRNA	lifted_all.ident
WBGene00023094|K03H6.t1	ncRNA	lifted_all.ident
WBGene00023095|K04A8.t2	ncRNA	lifted_all.ident
WBGene00023096|K04A8.t3	ncRNA	lifted_all.ident
WBGene00023097|K04C2.t1	ncRNA	lifted_all.ident
WBGene00023098|K04C2.t2	ncRNA	lifted_all.ident
WBGene00023099|K04C2.t3	ncRNA	lifted_all.ident
WBGene00023100|K05G3.t1	ncRNA	lifted_all.ident
WBGene00023101|K08B5.t1	ncRNA	lifted_all.ident
WBGene00023102|K08B5.t2	ncRNA	lifted_all.ident
WBGene00023103|K09C6.t1	ncRNA	lifted_all.ident
WBGene00023104|K10F12.8	ncRNA	lifted_all.ident
WBGene00023105|K11C4.t1	ncRNA	lifted_all.ident
WBGene00023106|K11H12.t1	ncRNA	lifted_all.ident
WBGene00023107|K12H4.t1	ncRNA	lifted_all.ident
WBGene00023108|M01E10.t1	ncRNA	lifted_all.ident
WBGene00023109|M01E10.t2	ncRNA	lifted_all.ident
WBGene00023110|M02F4.t1	ncRNA	lifted_all.ident
WBGene00023111|M02F4.t2	ncRNA	lifted_all.ident
WBGene00023112|M03A1.t1	ncRNA	lifted_all.ident
WBGene00023113|M03A1.t2	ncRNA	lifted_all.ident
WBGene00023115|M57.t1	ncRNA	lifted_all.ident
WBGene00023116|R02E12.t1	ncRNA	lifted_all.ident
WBGene00023117|R04A9.t1	ncRNA	lifted_all.ident
WBGene00023118|R04E5.t1	ncRNA	lifted_all.ident
WBGene00023119|R04E5.t2	ncRNA	lifted_all.ident
WBGene00023120|R04E5.t3	ncRNA	lifted_all.ident
WBGene00023121|R04E5.t4	ncRNA	lifted_all.ident
WBGene00023122|R04E5.t5	ncRNA	lifted_all.ident
WBGene00023123|R04E5.t6	ncRNA	lifted_all.ident
WBGene00023124|R11B5.t1	ncRNA	lifted_all.ident
WBGene00023125|R11B5.t2	ncRNA	lifted_all.ident
WBGene00023126|R11B5.t3	ncRNA	lifted_all.ident
WBGene00023127|R148.t1	ncRNA	lifted_all.ident
WBGene00023128|T03G6.t1	ncRNA	lifted_all.ident
WBGene00023129|T05A8.t1	ncRNA	lifted_all.ident
WBGene00023130|T05A8.t2	ncRNA	lifted_all.ident
WBGene00023131|T05C7.t1	ncRNA	lifted_all.ident
WBGene00023132|T07H6.t1	ncRNA	lifted_all.ident
WBGene00023133|T07H6.t2	ncRNA	lifted_all.ident
WBGene00023134|T08A9.t1	ncRNA	lifted_all.ident
WBGene00023135|T09B4.t1	ncRNA	lifted_all.ident
WBGene00023136|T09B4.t2	ncRNA	lifted_all.ident
WBGene00023137|T13B5.t2	ncRNA	lifted_all.ident
WBGene00023138|T14B4.t1	ncRNA	lifted_all.ident
WBGene00023139|T14F9.t1	ncRNA	lifted_all.ident
WBGene00023140|T15B12.t1	ncRNA	lifted_all.ident
WBGene00023141|T16D1.t1	ncRNA	lifted_all.ident
WBGene00023142|T20F5.1	ncRNA	lifted_all.ident
WBGene00023143|T22F3.t1	ncRNA	lifted_all.ident
WBGene00023144|T22F3.t2	ncRNA	lifted_all.ident
WBGene00023145|T22F3.t3	ncRNA	lifted_all.ident
WBGene00023146|T22F3.t4	ncRNA	lifted_all.ident
WBGene00023147|T22F7.t1	ncRNA	lifted_all.ident
WBGene00023148|T25B6.t1	ncRNA	lifted_all.ident
WBGene00023149|T25B6.t2	ncRNA	lifted_all.ident
WBGene00023150|T25D1.t2	ncRNA	lifted_all.ident
WBGene00023151|T25E4.t1	ncRNA	lifted_all.ident
WBGene00023152|T26C11.t1	ncRNA	lifted_all.ident
WBGene00023153|T27B1.t1	ncRNA	lifted_all.ident
WBGene00023154|T28B4.t1	ncRNA	lifted_all.ident
WBGene00023155|T28C12.t1	ncRNA	lifted_all.ident
WBGene00023156|T28F2.t1	ncRNA	lifted_all.ident
WBGene00023157|W02G9.t1	ncRNA	lifted_all.ident
WBGene00023158|W02G9.t2	ncRNA	lifted_all.ident
WBGene00023159|W06H8.5	ncRNA	lifted_all.ident
WBGene00023160|W09G10.t1	ncRNA	lifted_all.ident
WBGene00023161|W09G10.t2	ncRNA	lifted_all.ident
WBGene00023162|W09G10.t3	ncRNA	lifted_all.ident
WBGene00023164|W10G11.t1	ncRNA	lifted_all.ident
WBGene00023165|W10G11.t2	ncRNA	lifted_all.ident
WBGene00023166|Y4C6B.t1	ncRNA	lifted_all.ident
WBGene00023167|Y4C6B.t2	ncRNA	lifted_all.ident
WBGene00023168|Y17G9A.t1	ncRNA	lifted_all.ident
WBGene00023169|Y18H1A.t1	ncRNA	lifted_all.ident
WBGene00023170|Y22D7AL.t3	ncRNA	lifted_all.ident
WBGene00023171|Y22D7AL.t4	ncRNA	lifted_all.ident
WBGene00023173|Y25C1A.t1	ncRNA	lifted_all.ident
WBGene00023174|Y25C1A.t2	ncRNA	lifted_all.ident
WBGene00023175|Y37B11A.t2	ncRNA	lifted_all.ident
WBGene00023176|Y39G10AL.t1	ncRNA	lifted_all.ident
WBGene00023177|Y51H7BR.t1	ncRNA	lifted_all.ident
WBGene00023178|Y54G2A.t1	ncRNA	lifted_all.ident
WBGene00023179|Y54G2A.t2	ncRNA	lifted_all.ident
WBGene00023180|Y54G2A.t3	ncRNA	lifted_all.ident
WBGene00023181|Y54G2A.t4	ncRNA	lifted_all.ident
WBGene00023182|Y54G2A.t5	ncRNA	lifted_all.ident
WBGene00023183|Y55F3BR.9	ncRNA	lifted_all.ident
WBGene00023184|Y55F3BR.t1	ncRNA	lifted_all.ident
WBGene00023185|Y59E1B.t2	ncRNA	lifted_all.ident
WBGene00023187|Y67D8C.12	ncRNA	lifted_all.ident
WBGene00023188|Y69A2AR.t2	ncRNA	lifted_all.ident
WBGene00023189|Y71D11A.7	ncRNA	lifted_all.ident
WBGene00023190|Y71H2AM.t1	ncRNA	lifted_all.ident
WBGene00023192|Y73B6BL.t1	ncRNA	lifted_all.ident
WBGene00023193|Y74C9A.6	ncRNA	lifted_all.ident
WBGene00023194|Y75D11A.t2	ncRNA	lifted_all.ident
WBGene00023195|Y82E9BR.t1	ncRNA	lifted_all.ident
WBGene00023196|Y92C3A.t2	ncRNA	lifted_all.ident
WBGene00023197|Y92C3A.t3	ncRNA	lifted_all.ident
WBGene00023198|Y92H12A.t1	ncRNA	lifted_all.ident
WBGene00023199|Y95B8A.t1	ncRNA	lifted_all.ident
WBGene00023200|Y97E10C.t1	ncRNA	lifted_all.ident
WBGene00023201|Y102E9.t1	ncRNA	lifted_all.ident
WBGene00023202|Y104H12A.t1	ncRNA	lifted_all.ident
WBGene00023203|Y110A2AL.t1	ncRNA	lifted_all.ident
WBGene00023204|Y110A2AL.t2	ncRNA	lifted_all.ident
WBGene00023205|Y119D3B.10	ncRNA	lifted_all.ident
WBGene00023206|Y119D3B.t1	ncRNA	lifted_all.ident
WBGene00023207|ZC132.t1	ncRNA	lifted_all.ident
WBGene00023208|ZC449.t1	ncRNA	lifted_all.ident
WBGene00023210|ZK154.t1	ncRNA	lifted_all.ident
WBGene00023211|ZK154.t2	ncRNA	lifted_all.ident
WBGene00023212|ZK154.t3	ncRNA	lifted_all.ident
WBGene00023213|ZK154.t4	ncRNA	lifted_all.ident
WBGene00023214|ZK154.t5	ncRNA	lifted_all.ident
WBGene00023215|ZK380.t1	ncRNA	lifted_all.ident
WBGene00023216|ZK563.t1	ncRNA	lifted_all.ident
WBGene00023217|ZK622.t1	ncRNA	lifted_all.ident
WBGene00023218|ZK622.t2|rte-4	ncRNA	lifted_all.ident
WBGene00023219|ZK783.t1	ncRNA	lifted_all.ident
WBGene00023220|ZK994.t1	ncRNA	lifted_all.ident
WBGene00023221|ZK994.t2	ncRNA	lifted_all.ident
WBGene00023222|ZK994.t3	ncRNA	lifted_all.ident
WBGene00023428|K07C5.10	ncRNA	lifted_all.ident
WBGene00023429|W08G11.6	ncRNA	lifted_all.ident
WBGene00023430|D1054.17	ncRNA	lifted_all.ident
WBGene00023452|D1007.17|mir-353	ncRNA	lifted_all.ident
WBGene00023453|ZK652.12|mir-356.1	ncRNA	lifted_all.ident
WBGene00023454|F25G6.10|mir-357	ncRNA	lifted_all.ident
WBGene00023455|F25G6.11|mir-358	ncRNA	lifted_all.ident
WBGene00023456|Y23B4A.3|mir-360	ncRNA	lifted_all.ident
WBGene00023457|Y41G9A.9|mir-359	ncRNA	lifted_all.ident
WBGene00023461|F53G12.12	ncRNA	lifted_all.ident
WBGene00023466|R151.11	ncRNA	lifted_all.ident
WBGene00023467|Y38F2AR.14	ncRNA	lifted_all.ident
WBGene00023468|B0412.6	ncRNA	lifted_all.ident
WBGene00023469|C16A3.11	ncRNA	lifted_all.ident
WBGene00023472|F16A11.5	ncRNA	lifted_all.ident
WBGene00043991|AC8.13|mir-258.2	ncRNA	lifted_all.ident
WBGene00044161|C47G2.8	ncRNA	lifted_all.ident
WBGene00044704|C18A3.12	ncRNA	lifted_all.ident
WBGene00044728|Y53F4B.45	ncRNA	lifted_no.ident
WBGene00044747|ZK1005.2	ncRNA	lifted_all.ident
WBGene00044748|ZK402.6	ncRNA	lifted_all.ident
WBGene00044749|W01C8.8	ncRNA	lifted_all.ident
WBGene00044750|Y39D8C.2	ncRNA	lifted_all.ident
WBGene00044751|F14D2.16	ncRNA	lifted_all.ident
WBGene00044923|T27E4.10	ncRNA	lifted_all.ident
WBGene00044925|Y37E3.20	ncRNA	lifted_all.ident
WBGene00044926|Y39G10AR.24	ncRNA	lifted_all.ident
WBGene00044927|F32B5.9	ncRNA	lifted_all.ident
WBGene00044928|Y71F9AM.7	ncRNA	lifted_all.ident
WBGene00044929|R12E2.17	ncRNA	lifted_all.ident
WBGene00044930|T19B4.8	ncRNA	lifted_all.ident
WBGene00044931|Y37E3.21	ncRNA	lifted_all.ident
WBGene00044932|Y37E3.22	ncRNA	lifted_all.ident
WBGene00044933|ZK484.9	ncRNA	lifted_all.ident
WBGene00044934|T27A3.9	ncRNA	lifted_all.ident
WBGene00044935|T08B2.13	ncRNA	lifted_all.ident
WBGene00044936|T24H7.6	ncRNA	lifted_all.ident
WBGene00044937|ZK546.18	ncRNA	lifted_all.ident
WBGene00044938|C27H5.9	ncRNA	lifted_all.ident
WBGene00044939|B0412.7	ncRNA	lifted_all.ident
WBGene00044940|H06I04.8	ncRNA	lifted_all.ident
WBGene00044941|F54E7.10	ncRNA	lifted_all.ident
WBGene00044942|F54E7.11	ncRNA	lifted_all.ident
WBGene00044943|R151.12	ncRNA	lifted_all.ident
WBGene00044944|R151.13	ncRNA	lifted_all.ident
WBGene00044945|C07H6.10	ncRNA	lifted_all.ident
WBGene00044946|C03B8.5	ncRNA	lifted_all.ident
WBGene00044947|F32E10.10	ncRNA	lifted_all.ident
WBGene00044948|K11H12.12	ncRNA	lifted_all.ident
WBGene00044952|Y24D9A.9	ncRNA	lifted_all.ident
WBGene00044954|D2096.14	ncRNA	lifted_all.ident
WBGene00044955|K07C11.11	ncRNA	lifted_all.ident
WBGene00044956|K07C11.12	ncRNA	lifted_all.ident
WBGene00044957|C08D8.3	ncRNA	lifted_all.ident
WBGene00044958|ZK994.7	ncRNA	lifted_all.ident
WBGene00044961|F56A12.5	ncRNA	lifted_all.ident
WBGene00044962|F28D1.13	ncRNA	lifted_all.ident
WBGene00044963|K07C5.11	ncRNA	lifted_all.ident
WBGene00044964|F22D6.16	ncRNA	lifted_all.ident
WBGene00044965|D1086.13|smy-6	ncRNA	lifted_all.ident
WBGene00044966|Y57G11C.53|smy-12	ncRNA	lifted_all.ident
WBGene00044967|Y45F10B.16|smy-9	ncRNA	lifted_all.ident
WBGene00044968|K10H10.11	ncRNA	lifted_bad.coding
WBGene00044969|T28D6.10	ncRNA	lifted_bad.coding
WBGene00044970|F38E11.14	ncRNA	lifted_all.ident
WBGene00044971|C15H11.12	ncRNA	lifted_all.ident
WBGene00044972|F35E12.11	ncRNA	lifted_all.ident
WBGene00044973|F08G2.12	ncRNA	lifted_all.ident
WBGene00044974|C27H6.5	ncRNA	lifted_all.ident
WBGene00044975|F47G4.9	ncRNA	lifted_all.ident
WBGene00044980|B0399.3	ncRNA	lifted_all.ident
WBGene00044981|D2013.11	ncRNA	lifted_all.ident
WBGene00044982|C01A2.8	ncRNA	lifted_all.ident
WBGene00044983|T04B2.9	ncRNA	lifted_all.ident
WBGene00044984|C27C7.9	ncRNA	lifted_all.ident
WBGene00044985|F37B12.5	ncRNA	lifted_all.ident
WBGene00044986|C34E7.5	ncRNA	lifted_all.ident
WBGene00045043|Y116A8C.48	ncRNA	lifted_all.ident
WBGene00045051|K11H12.13	ncRNA	lifted_all.ident
WBGene00045055|C16D9.11	ncRNA	lifted_all.ident
WBGene00045071|T03F7.8	ncRNA	lifted_all.ident
WBGene00045072|Y43F4B.11	ncRNA	lifted_all.ident
WBGene00045074|R166.7	ncRNA	lifted_all.ident
WBGene00045082|F46F11.12	ncRNA	lifted_all.ident
WBGene00045083|C04G6.12	ncRNA	lifted_all.ident
WBGene00045084|K11C4.6	ncRNA	lifted_all.ident
WBGene00045085|Y24D9A.10	ncRNA	lifted_all.ident
WBGene00045086|Y43B11AR.7	ncRNA	lifted_all.ident
WBGene00045087|B0041.9	ncRNA	lifted_all.ident
WBGene00045088|F48A11.7	ncRNA	lifted_all.ident
WBGene00045089|C05H8.3	ncRNA	lifted_all.ident
WBGene00045090|C27H5.10	ncRNA	lifted_all.ident
WBGene00045091|C27H5.11	ncRNA	lifted_all.ident
WBGene00045092|H06I04.9	ncRNA	lifted_all.ident
WBGene00045093|Y23H5B.10	ncRNA	lifted_all.ident
WBGene00045094|D1007.20	ncRNA	lifted_all.ident
WBGene00045095|E04F6.16|mrpr-1	ncRNA	lifted_all.ident
WBGene00045109|C33A12.21|smy-2	ncRNA	lifted_all.ident
WBGene00045110|K12D12.6	ncRNA	lifted_all.ident
WBGene00045111|K12D12.7	ncRNA	lifted_all.ident
WBGene00045112|K12D12.8	ncRNA	lifted_all.ident
WBGene00045113|Y43F4B.12	ncRNA	lifted_all.ident
WBGene00045114|W01C9.6	ncRNA	lifted_all.ident
WBGene00045115|K02C4.7	ncRNA	lifted_all.ident
WBGene00045116|C53D6.12	ncRNA	lifted_all.ident
WBGene00045117|M163.12	ncRNA	lifted_all.ident
WBGene00045118|T04A8.17	ncRNA	lifted_all.ident
WBGene00045119|F08G2.13	ncRNA	lifted_all.ident
WBGene00045120|Y43F8C.22	ncRNA	lifted_all.ident
WBGene00045121|C46C2.8	ncRNA	lifted_all.ident
WBGene00045123|W01D2.7	ncRNA	lifted_all.ident
WBGene00045124|C07A9.14	ncRNA	lifted_all.ident
WBGene00045125|F54C9.12	ncRNA	lifted_all.ident
WBGene00045126|C14C10.8	ncRNA	lifted_all.ident
WBGene00045127|W03C9.9	ncRNA	lifted_all.ident
WBGene00045129|Y75B12B.12	ncRNA	lifted_all.ident
WBGene00045130|F28C6.11	ncRNA	lifted_all.ident
WBGene00045132|ZK643.9	ncRNA	lifted_all.ident
WBGene00045133|M163.13	ncRNA	lifted_all.ident
WBGene00045134|K07C5.12	ncRNA	lifted_all.ident
WBGene00045136|D1046.6	ncRNA	lifted_all.ident
WBGene00045137|F56A12.6	ncRNA	lifted_all.ident
WBGene00045138|F25H2.14	ncRNA	lifted_all.ident
WBGene00045139|F01D5.12	ncRNA	lifted_all.ident
WBGene00045140|T06C12.16	ncRNA	lifted_all.ident
WBGene00045141|Y53F4B.47	ncRNA	lifted_all.ident
WBGene00045142|Y53F4B.48	ncRNA	lifted_all.ident
WBGene00045145|F10D2.13	ncRNA	lifted_all.ident
WBGene00045147|T10B9.11	ncRNA	lifted_all.ident
WBGene00045148|C06A1.8	ncRNA	lifted_all.ident
WBGene00045149|W05B2.9	ncRNA	lifted_all.ident
WBGene00045150|ZK265.10	ncRNA	lifted_all.ident
WBGene00045151|F17C11.14	ncRNA	lifted_all.ident
WBGene00045152|C06A1.9	ncRNA	lifted_all.ident
WBGene00045153|F11A10.9	ncRNA	lifted_all.ident
WBGene00045154|C10C6.8	ncRNA	lifted_all.ident
WBGene00045155|Y116A8C.50	ncRNA	lifted_all.ident
WBGene00045156|T02E1.9	ncRNA	lifted_all.ident
WBGene00045157|K02C4.8	ncRNA	lifted_all.ident
WBGene00045158|M163.14	ncRNA	lifted_all.ident
WBGene00045159|D1086.14|smy-3	ncRNA	lifted_all.ident
WBGene00045160|C41C4.11	ncRNA	lifted_all.ident
WBGene00045161|C38C6.7|lfor-2	ncRNA	lifted_all.ident
WBGene00045162|F25H2.15	ncRNA	lifted_all.ident
WBGene00045163|Y67A10A.14	ncRNA	lifted_all.ident
WBGene00045164|F59C6.15	ncRNA	lifted_all.ident
WBGene00045165|H38K22.8	ncRNA	lifted_all.ident
WBGene00045167|F43A11.8	ncRNA	lifted_all.ident
WBGene00045168|B0285.12	ncRNA	lifted_all.ident
WBGene00045169|T19C4.11	ncRNA	lifted_bad.coding
WBGene00045170|T19C4.12	ncRNA	lifted_all.ident
WBGene00045171|K09E9.5	ncRNA	lifted_all.ident
WBGene00045172|K08E3.11	ncRNA	lifted_all.ident
WBGene00045176|C53B7.8	ncRNA	lifted_all.ident
WBGene00045189|B0284.6	ncRNA	lifted_all.ident
WBGene00045194|C33A12.22|smy-1	ncRNA	lifted_all.ident
WBGene00045199|D1086.15|smy-5	ncRNA	lifted_all.ident
WBGene00045200|D1086.16|smy-4	ncRNA	lifted_all.ident
WBGene00045201|Y45F10B.20|smy-10	ncRNA	lifted_all.ident
WBGene00045203|Y45F10B.19|smy-8	ncRNA	lifted_all.ident
WBGene00045204|Y57G11C.55|smy-11	ncRNA	lifted_all.ident
WBGene00045205|Y73B6BL.46|smy-7	ncRNA	lifted_all.ident
WBGene00045238|Y48G10A.7|rpr-1	ncRNA	lifted_all.ident
WBGene00045282|Y57G11C.56	ncRNA	lifted_all.ident
WBGene00045324|F08G12.12|mir-787	ncRNA	lifted_all.ident
WBGene00045325|Y51H4A.34|mir-789.1	ncRNA	lifted_all.ident
WBGene00045326|T28F3.10|mir-789.2	ncRNA	lifted_all.ident
WBGene00045327|M03B6.6|mir-793	ncRNA	lifted_all.ident
WBGene00045328|T07D10.7|mir-794	ncRNA	lifted_all.ident
WBGene00045329|F33E2.9|mir-795	ncRNA	lifted_all.ident
WBGene00045330|Y64G10A.14|mir-798	ncRNA	lifted_all.ident
WBGene00045341|C18A11.8|mir-784	ncRNA	lifted_all.ident
WBGene00045342|Y41G9A.11|mir-785	ncRNA	lifted_all.ident
WBGene00045343|C39D10.12|mir-786	ncRNA	lifted_all.ident
WBGene00045350|T01B10.6|mir-788	ncRNA	lifted_all.ident
WBGene00045351|T12E12.8|mir-790	ncRNA	lifted_all.ident
WBGene00045352|F13D11.5|mir-791	ncRNA	lifted_all.ident
WBGene00045353|F59D6.8|mir-792	ncRNA	lifted_all.ident
WBGene00045354|C14E2.8|mir-796	ncRNA	lifted_all.ident
WBGene00045358|C39E6.8|mir-797	ncRNA	lifted_all.ident
WBGene00045359|F18E9.9|mir-799	ncRNA	lifted_all.ident
WBGene00045360|R04A9.8|mir-800	ncRNA	lifted_all.ident
WBGene00045367|F17C11.15	ncRNA	lifted_all.ident
WBGene00045368|T23G5.7	ncRNA	lifted_all.ident
WBGene00045369|F26E4.14	ncRNA	lifted_bad.coding
WBGene00045370|ZK265.11	ncRNA	lifted_all.ident
WBGene00045371|M163.15	ncRNA	lifted_all.ident
WBGene00045372|W01D2.8	ncRNA	lifted_all.ident
WBGene00045373|Y46G5A.40	ncRNA	lifted_all.ident
WBGene00045374|B0393.10	ncRNA	lifted_all.ident
WBGene00045375|C17D12.8	ncRNA	lifted_all.ident
WBGene00045376|F25H5.9	ncRNA	lifted_all.ident
WBGene00045377|F19H8.6	ncRNA	lifted_all.ident
WBGene00045378|H04D03.5	ncRNA	lifted_all.ident
WBGene00045388|C38C6.8|lfor-1	ncRNA	lifted_all.ident
WBGene00045389|Y38F1A.11	ncRNA	lifted_all.ident
WBGene00045391|F52D4.1	ncRNA	lifted_all.ident
WBGene00045518|H35B03.3|21ur-5153	ncRNA	lifted_all.ident
WBGene00045519|Y105C5A.32|21ur-4348	ncRNA	lifted_all.ident
WBGene00045520|Y105C5A.33|21ur-3279	ncRNA	lifted_all.ident
WBGene00045521|Y51H4A.35|21ur-4491	ncRNA	lifted_all.ident
WBGene00045522|Y64G10A.15|21ur-1293	ncRNA	lifted_all.ident
WBGene00045523|M199.10|21ur-4900	ncRNA	lifted_all.ident
WBGene00045524|Y105C5A.34|21ur-2872	ncRNA	lifted_all.ident
WBGene00045525|F52B11.9|21ur-4886	ncRNA	lifted_all.ident
WBGene00045526|Y37A1B.19|21ur-3726	ncRNA	lifted_all.ident
WBGene00045527|Y105C5B.32|21ur-3449	ncRNA	lifted_all.ident
WBGene00045528|H32C10.4|21ur-4318	ncRNA	lifted_all.ident
WBGene00045529|T23G4.6|21ur-3987	ncRNA	lifted_all.ident
WBGene00045530|Y7A9D.2|21ur-770	ncRNA	lifted_all.ident
WBGene00045531|Y105C5A.35|21ur-3262	ncRNA	lifted_all.ident
WBGene00045532|C02B10.7|21ur-116	ncRNA	lifted_all.ident
WBGene00045533|T06A10.5|21ur-338	ncRNA	lifted_all.ident
WBGene00045534|C52D10.14|21ur-248	ncRNA	lifted_all.ident
WBGene00045535|Y37A1B.20|21ur-2337	ncRNA	lifted_all.ident
WBGene00045536|Y57G11B.9|21ur-2148	ncRNA	lifted_all.ident
WBGene00045537|F44E8.2|21ur-3280	ncRNA	lifted_all.ident
WBGene00045538|Y51H4A.36|21ur-783	ncRNA	lifted_all.ident
WBGene00045539|Y73F8A.41|21ur-2502	ncRNA	lifted_all.ident
WBGene00045540|Y64G10A.16|21ur-2533	ncRNA	lifted_all.ident
WBGene00045541|C35D6.15|21ur-2515	ncRNA	lifted_all.ident
WBGene00045542|Y105C5B.33|21ur-194	ncRNA	lifted_all.ident
WBGene00045543|C08F11.20|21ur-1754	ncRNA	lifted_all.ident
WBGene00045544|C11D2.8|21ur-3162	ncRNA	lifted_all.ident
WBGene00045545|Y73F8A.42|21ur-4859	ncRNA	lifted_all.ident
WBGene00045546|Y116A8A.12|21ur-3313	ncRNA	lifted_all.ident
WBGene00045547|H04M03.13|21ur-2522	ncRNA	lifted_all.ident
WBGene00045548|Y51H4A.37|21ur-2768	ncRNA	lifted_all.ident
WBGene00045549|ZK381.9|21ur-4660	ncRNA	lifted_all.ident
WBGene00045550|T06A10.6|21ur-380	ncRNA	lifted_all.ident
WBGene00045551|Y105C5A.36|21ur-127	ncRNA	lifted_all.ident
WBGene00045552|H08M01.3|21ur-3009	ncRNA	lifted_all.ident
WBGene00045553|H12I19.10|21ur-4396	ncRNA	lifted_all.ident
WBGene00045554|Y105C5A.37|21ur-3929	ncRNA	lifted_all.ident
WBGene00045555|H25K10.8|21ur-4158	ncRNA	lifted_all.ident
WBGene00045556|Y105C5A.38|21ur-972	ncRNA	lifted_all.ident
WBGene00045557|Y105C5A.39|21ur-4509	ncRNA	lifted_all.ident
WBGene00045558|C47A4.8|21ur-4358	ncRNA	lifted_all.ident
WBGene00045559|Y116A8C.54|21ur-4032	ncRNA	lifted_all.ident
WBGene00045560|Y57G11A.7|21ur-3396	ncRNA	lifted_all.ident
WBGene00045561|R05A10.11|21ur-4184	ncRNA	lifted_all.ident
WBGene00045562|Y105C5B.34|21ur-231	ncRNA	lifted_all.ident
WBGene00045563|C26C9.3|21ur-4606	ncRNA	lifted_all.ident
WBGene00045564|F55B11.8|21ur-4026	ncRNA	lifted_all.ident
WBGene00045565|Y67A10A.16|21ur-1557	ncRNA	lifted_all.ident
WBGene00045566|Y116A8C.55|21ur-4925	ncRNA	lifted_all.ident
WBGene00045567|Y105C5A.40|21ur-4269	ncRNA	lifted_all.ident
WBGene00045568|H12I19.11|21ur-3115	ncRNA	lifted_all.ident
WBGene00045569|Y37A1B.21|21ur-4858	ncRNA	lifted_all.ident
WBGene00045570|Y40H7A.17|21ur-422	ncRNA	lifted_all.ident
WBGene00045571|Y73F8A.43|21ur-3283	ncRNA	lifted_all.ident
WBGene00045572|Y41E3.24|21ur-66	ncRNA	lifted_all.ident
WBGene00045573|Y41E3.25|21ur-3960	ncRNA	lifted_all.ident
WBGene00045574|E03H12.11|21ur-3455	ncRNA	lifted_all.ident
WBGene00045575|Y105C5B.35|21ur-3399	ncRNA	lifted_all.ident
WBGene00045576|Y57G11B.10|21ur-1907	ncRNA	lifted_all.ident
WBGene00045577|C47A4.9|21ur-341	ncRNA	lifted_all.ident
WBGene00045578|Y57G11C.58|21ur-4400	ncRNA	lifted_all.ident
WBGene00045579|C27H2.6|21ur-213	ncRNA	lifted_all.ident
WBGene00045580|Y105C5A.41|21ur-3922	ncRNA	lifted_all.ident
WBGene00045581|Y116A8A.13|21ur-3683	ncRNA	lifted_all.ident
WBGene00045582|Y105C5A.42|21ur-3176	ncRNA	lifted_all.ident
WBGene00045583|Y57G11C.59|21ur-4174	ncRNA	lifted_all.ident
WBGene00045584|B0273.5|21ur-4213	ncRNA	lifted_all.ident
WBGene00045585|H08M01.4|21ur-687	ncRNA	lifted_all.ident
WBGene00045586|Y105C5A.43|21ur-5133	ncRNA	lifted_all.ident
WBGene00045587|H08M01.5|21ur-4538	ncRNA	lifted_all.ident
WBGene00045588|C46G7.6|21ur-4731	ncRNA	lifted_all.ident
WBGene00045589|Y57G11C.60|21ur-1571	ncRNA	lifted_all.ident
WBGene00045590|Y73F8A.44|21ur-5440	ncRNA	lifted_all.ident
WBGene00045591|Y45F10B.21|21ur-3641	ncRNA	lifted_all.ident
WBGene00045592|Y4C6B.8|21ur-4673	ncRNA	lifted_all.ident
WBGene00045593|Y105C5B.36|21ur-2000	ncRNA	lifted_all.ident
WBGene00045594|Y105C5B.37|21ur-2563	ncRNA	lifted_all.ident
WBGene00045595|F36H12.21|21ur-676	ncRNA	lifted_all.ident
WBGene00045596|Y7A9D.3|21ur-5434	ncRNA	lifted_all.ident
WBGene00045597|Y57G11C.61|21ur-2918	ncRNA	lifted_all.ident
WBGene00045598|H04M03.14|21ur-3144	ncRNA	lifted_all.ident
WBGene00045599|Y57G11C.62|21ur-3790	ncRNA	lifted_all.ident
WBGene00045600|C55C3.9|21ur-3069	ncRNA	lifted_all.ident
WBGene00045601|Y57G11C.63|21ur-1104	ncRNA	lifted_all.ident
WBGene00045602|Y116A8A.14|21ur-4930	ncRNA	lifted_all.ident
WBGene00045603|Y73F8A.45|21ur-5393	ncRNA	lifted_all.ident
WBGene00045604|Y73F8A.46|21ur-4121	ncRNA	lifted_all.ident
WBGene00045605|B0513.13|21ur-1446	ncRNA	lifted_all.ident
WBGene00045606|F23B2.16|21ur-4963	ncRNA	lifted_all.ident
WBGene00045607|Y67A10A.17|21ur-3239	ncRNA	lifted_all.ident
WBGene00045608|Y105C5A.44|21ur-4548	ncRNA	lifted_all.ident
WBGene00045609|Y73F8A.47|21ur-2932	ncRNA	lifted_all.ident
WBGene00045610|Y51H4A.38|21ur-1584	ncRNA	lifted_all.ident
WBGene00045611|C35D6.16|21ur-620	ncRNA	lifted_all.ident
WBGene00045612|F55B11.9|21ur-5367	ncRNA	lifted_all.ident
WBGene00045613|Y105C5A.45|21ur-2568	ncRNA	lifted_all.ident
WBGene00045614|Y105C5A.46|21ur-2293	ncRNA	lifted_all.ident
WBGene00045615|Y51H4A.39|21ur-310	ncRNA	lifted_all.ident
WBGene00045616|Y40H7A.18|21ur-344	ncRNA	lifted_all.ident
WBGene00045617|B0350.4|21ur-5229	ncRNA	lifted_all.ident
WBGene00045618|Y41E3.26|21ur-3525	ncRNA	lifted_all.ident
WBGene00045619|C39H7.10|21ur-5354	ncRNA	lifted_all.ident
WBGene00045620|Y64G10A.17|21ur-2363	ncRNA	lifted_all.ident
WBGene00045621|Y40H7A.19|21ur-5452	ncRNA	lifted_all.ident
WBGene00045622|Y105C5B.38|21ur-2954	ncRNA	lifted_all.ident
WBGene00045623|Y73F8A.48|21ur-3951	ncRNA	lifted_all.ident
WBGene00045624|F13G11.4|21ur-3736	ncRNA	lifted_all.ident
WBGene00045625|W03F8.11|21ur-419	ncRNA	lifted_all.ident
WBGene00045626|Y105C5A.47|21ur-5135	ncRNA	lifted_all.ident
WBGene00045627|C52D10.15|21ur-4966	ncRNA	lifted_all.ident
WBGene00045628|Y73F8A.49|21ur-3440	ncRNA	lifted_all.ident
WBGene00045629|Y40H7A.20|21ur-2914	ncRNA	lifted_all.ident
WBGene00045630|Y73F8A.50|21ur-2195	ncRNA	lifted_all.ident
WBGene00045631|Y64G10A.18|21ur-4580	ncRNA	lifted_all.ident
WBGene00045632|Y4C6A.5|21ur-2136	ncRNA	lifted_all.ident
WBGene00045633|Y67A10A.18|21ur-5345	ncRNA	lifted_all.ident
WBGene00045634|Y105C5A.48|21ur-3163	ncRNA	lifted_all.ident
WBGene00045635|Y45F10D.17|21ur-98	ncRNA	lifted_all.ident
WBGene00045636|Y73F8A.51|21ur-629	ncRNA	lifted_all.ident
WBGene00045637|Y64G10A.19|21ur-3513	ncRNA	lifted_all.ident
WBGene00045638|T23G4.7|21ur-4117	ncRNA	lifted_all.ident
WBGene00045639|H12I19.12|21ur-1324	ncRNA	lifted_all.ident
WBGene00045640|Y105C5B.39|21ur-2876	ncRNA	lifted_all.ident
WBGene00045641|ZK550.8|21ur-4617	ncRNA	lifted_all.ident
WBGene00045642|Y73F8A.52|21ur-3810	ncRNA	lifted_all.ident
WBGene00045643|Y73F8A.53|21ur-2772	ncRNA	lifted_all.ident
WBGene00045644|AC7.4|21ur-3853	ncRNA	lifted_all.ident
WBGene00045645|Y57G11C.64|21ur-1572	ncRNA	lifted_all.ident
WBGene00045646|F02H6.8|21ur-4784	ncRNA	lifted_all.ident
WBGene00045647|Y105C5B.40|21ur-101	ncRNA	lifted_all.ident
WBGene00045648|Y41E3.27|21ur-4235	ncRNA	lifted_all.ident
WBGene00045649|H04M03.15|21ur-198	ncRNA	lifted_all.ident
WBGene00045650|Y73F8A.54|21ur-2547	ncRNA	lifted_all.ident
WBGene00045651|Y64G10A.20|21ur-1325	ncRNA	lifted_all.ident
WBGene00045652|Y105C5A.49|21ur-378	ncRNA	lifted_all.ident
WBGene00045653|F44E8.3|21ur-1257	ncRNA	lifted_all.ident
WBGene00045654|T06A10.7|21ur-3621	ncRNA	lifted_all.ident
WBGene00045655|C46G7.7|21ur-2179	ncRNA	lifted_all.ident
WBGene00045656|Y57G11C.65|21ur-2373	ncRNA	lifted_all.ident
WBGene00045657|Y73F8A.55|21ur-4637	ncRNA	lifted_all.ident
WBGene00045658|M199.11|21ur-5357	ncRNA	lifted_all.ident
WBGene00045659|Y57G11C.66|21ur-1723	ncRNA	lifted_all.ident
WBGene00045660|Y73F8A.56|21ur-5403	ncRNA	lifted_all.ident
WBGene00045661|Y37A1B.22|21ur-780	ncRNA	lifted_all.ident
WBGene00045662|Y67A10A.19|21ur-4553	ncRNA	lifted_all.ident
WBGene00045663|Y105C5B.41|21ur-5087	ncRNA	lifted_all.ident
WBGene00045664|Y57G11C.67|21ur-553	ncRNA	lifted_all.ident
WBGene00045665|Y51H4A.40|21ur-3191	ncRNA	lifted_all.ident
WBGene00045666|Y41E3.28|21ur-3306	ncRNA	lifted_all.ident
WBGene00045667|B0273.6|21ur-22	ncRNA	lifted_all.ident
WBGene00045668|C39H7.11|21ur-1242	ncRNA	lifted_all.ident
WBGene00045669|Y51H4A.41|21ur-1303	ncRNA	lifted_all.ident
WBGene00045670|Y9C9A.19|21ur-2441	ncRNA	lifted_all.ident
WBGene00045671|Y40H7A.21|21ur-1935	ncRNA	lifted_all.ident
WBGene00045672|F13G11.5|21ur-2786	ncRNA	lifted_all.ident
WBGene00045673|Y105C5B.42|21ur-3453	ncRNA	lifted_all.ident
WBGene00045674|Y105C5B.43|21ur-4693	ncRNA	lifted_all.ident
WBGene00045675|Y105C5B.44|21ur-2281	ncRNA	lifted_all.ident
WBGene00045676|VY10G11R.5|21ur-2712	ncRNA	lifted_all.ident
WBGene00045677|Y73F8A.57|21ur-5214	ncRNA	lifted_all.ident
WBGene00045678|H16O14.3|21ur-1078	ncRNA	lifted_all.ident
WBGene00045679|F44E8.4|21ur-3510	ncRNA	lifted_all.ident
WBGene00045680|Y105C5A.50|21ur-4163	ncRNA	lifted_all.ident
WBGene00045681|Y73F8A.58|21ur-5291	ncRNA	lifted_all.ident
WBGene00045682|Y37A1A.5|21ur-527	ncRNA	lifted_all.ident
WBGene00045683|Y64G10A.21|21ur-5312	ncRNA	lifted_all.ident
WBGene00045684|B0273.7|21ur-5385	ncRNA	lifted_all.ident
WBGene00045685|Y116A8C.56|21ur-1986	ncRNA	lifted_all.ident
WBGene00045686|Y105C5A.51|21ur-3553	ncRNA	lifted_all.ident
WBGene00045687|Y67A10A.20|21ur-1049	ncRNA	lifted_all.ident
WBGene00045688|C11D2.9|21ur-4041	ncRNA	lifted_all.ident
WBGene00045689|Y105C5B.45|21ur-3409	ncRNA	lifted_all.ident
WBGene00045690|F55B11.10|21ur-5085	ncRNA	lifted_all.ident
WBGene00045691|Y105C5A.52|21ur-4812	ncRNA	lifted_all.ident
WBGene00045692|Y51H4A.42|21ur-946	ncRNA	lifted_all.ident
WBGene00045693|F38C2.9|21ur-2392	ncRNA	lifted_all.ident
WBGene00045694|Y105C5A.53|21ur-5223	ncRNA	lifted_all.ident
WBGene00045695|Y40H7A.22|21ur-4519	ncRNA	lifted_all.ident
WBGene00045696|Y105C5A.54|21ur-2704	ncRNA	lifted_all.ident
WBGene00045697|Y57G11B.11|21ur-481	ncRNA	lifted_all.ident
WBGene00045698|F56F12.2|21ur-5244	ncRNA	lifted_all.ident
WBGene00045699|Y57G11C.68|21ur-5080	ncRNA	lifted_all.ident
WBGene00045700|Y7A9A.26|21ur-1137	ncRNA	lifted_all.ident
WBGene00045701|C47A4.10|21ur-1580	ncRNA	lifted_all.ident
WBGene00045702|Y105C5B.46|21ur-1740	ncRNA	lifted_all.ident
WBGene00045703|F52D4.2|21ur-457	ncRNA	lifted_all.ident
WBGene00045704|Y105C5B.47|21ur-3053	ncRNA	lifted_all.ident
WBGene00045705|Y64G10A.22|21ur-3074	ncRNA	lifted_all.ident
WBGene00045706|Y73F8A.59|21ur-163	ncRNA	lifted_all.ident
WBGene00045707|Y7A9D.4|21ur-1530	ncRNA	lifted_all.ident
WBGene00045708|B0273.8|21ur-3591	ncRNA	lifted_all.ident
WBGene00045709|Y37A1B.23|21ur-5427	ncRNA	lifted_all.ident
WBGene00045710|Y7A9A.3|21ur-2758	ncRNA	lifted_all.ident
WBGene00045711|W03F8.12|21ur-2189	ncRNA	lifted_all.ident
WBGene00045712|Y105C5A.55|21ur-877	ncRNA	lifted_all.ident
WBGene00045713|Y73F8A.60|21ur-2188	ncRNA	lifted_all.ident
WBGene00045714|Y73F8A.61|21ur-895	ncRNA	lifted_all.ident
WBGene00045715|Y43D4A.11|21ur-764	ncRNA	lifted_all.ident
WBGene00045716|Y105C5A.56|21ur-2080	ncRNA	lifted_all.ident
WBGene00045717|Y116A8C.57|21ur-3347	ncRNA	lifted_all.ident
WBGene00045718|Y65A5A.4|21ur-1995	ncRNA	lifted_all.ident
WBGene00045719|Y64G10A.23|21ur-927	ncRNA	lifted_all.ident
WBGene00045720|Y73F8A.62|21ur-1318	ncRNA	lifted_all.ident
WBGene00045721|Y40H7A.23|21ur-1126	ncRNA	lifted_all.ident
WBGene00045722|Y105C5A.57|21ur-4997	ncRNA	lifted_all.ident
WBGene00045723|Y57G11B.12|21ur-368	ncRNA	lifted_all.ident
WBGene00045724|Y67A10A.21|21ur-1377	ncRNA	lifted_all.ident
WBGene00045725|Y57G11C.69|21ur-4839	ncRNA	lifted_all.ident
WBGene00045726|Y43D4A.12|21ur-4151	ncRNA	lifted_all.ident
WBGene00045727|LLC1.5|21ur-719	ncRNA	lifted_all.ident
WBGene00045728|C02B10.8|21ur-2397	ncRNA	lifted_all.ident
WBGene00045729|Y41E3.29|21ur-4447	ncRNA	lifted_all.ident
WBGene00045730|Y40H7A.24|21ur-1475	ncRNA	lifted_all.ident
WBGene00045731|C26C9.4|21ur-2329	ncRNA	lifted_all.ident
WBGene00045732|M03D4.7|21ur-4317	ncRNA	lifted_all.ident
WBGene00045733|B0273.9|21ur-4254	ncRNA	lifted_all.ident
WBGene00045734|Y105C5B.48|21ur-3918	ncRNA	lifted_all.ident
WBGene00045735|C06E7.8|21ur-3996	ncRNA	lifted_all.ident
WBGene00045736|Y37A1B.24|21ur-1612	ncRNA	lifted_all.ident
WBGene00045737|Y105C5B.49|21ur-3619	ncRNA	lifted_all.ident
WBGene00045738|C06E7.9|21ur-4550	ncRNA	lifted_all.ident
WBGene00045739|H08M01.6|21ur-5063	ncRNA	lifted_all.ident
WBGene00045740|Y45F10D.18|21ur-4575	ncRNA	lifted_all.ident
WBGene00045741|Y105C5B.50|21ur-157	ncRNA	lifted_all.ident
WBGene00045743|ZK616.11|21ur-5073	ncRNA	lifted_all.ident
WBGene00045744|Y51H4A.43|21ur-26	ncRNA	lifted_all.ident
WBGene00045745|C27H2.7|21ur-805	ncRNA	lifted_all.ident
WBGene00045746|Y105C5A.58|21ur-1219	ncRNA	lifted_all.ident
WBGene00045747|Y51H4A.44|21ur-4706	ncRNA	lifted_all.ident
WBGene00045748|F36H12.22|21ur-4832	ncRNA	lifted_all.ident
WBGene00045749|Y73F8A.63|21ur-2613	ncRNA	lifted_all.ident
WBGene00045750|Y51H4A.45|21ur-3704	ncRNA	lifted_all.ident
WBGene00045751|Y116A8A.15|21ur-2649	ncRNA	lifted_all.ident
WBGene00045752|Y10G11A.4|21ur-909	ncRNA	lifted_all.ident
WBGene00045753|Y105C5B.51|21ur-2356	ncRNA	lifted_all.ident
WBGene00045754|Y105C5A.59|21ur-3041	ncRNA	lifted_all.ident
WBGene00045755|C02B10.9|21ur-506	ncRNA	lifted_all.ident
WBGene00045756|Y67A10A.22|21ur-4821	ncRNA	lifted_all.ident
WBGene00045757|Y51H4A.46|21ur-4437	ncRNA	lifted_all.ident
WBGene00045758|Y37A1B.25|21ur-133	ncRNA	lifted_all.ident
WBGene00045759|Y105C5A.60|21ur-5218	ncRNA	lifted_all.ident
WBGene00045760|Y10G11A.5|21ur-4478	ncRNA	lifted_all.ident
WBGene00045761|C46G7.8|21ur-3127	ncRNA	lifted_all.ident
WBGene00045762|Y116A8C.58|21ur-1620	ncRNA	lifted_all.ident
WBGene00045763|Y105C5A.61|21ur-3601	ncRNA	lifted_all.ident
WBGene00045764|Y67A10A.23|21ur-2085	ncRNA	lifted_all.ident
WBGene00045765|Y51H4A.47|21ur-4567	ncRNA	lifted_all.ident
WBGene00045766|F02H6.9|21ur-279	ncRNA	lifted_all.ident
WBGene00045767|Y57G11B.13|21ur-2961	ncRNA	lifted_all.ident
WBGene00045768|Y37A1A.6|21ur-5176	ncRNA	lifted_all.ident
WBGene00045769|Y37A1A.7|21ur-1922	ncRNA	lifted_all.ident
WBGene00045770|Y105C5A.62|21ur-5265	ncRNA	lifted_all.ident
WBGene00045771|C39H7.12|21ur-237	ncRNA	lifted_all.ident
WBGene00045772|Y73F8A.64|21ur-4898	ncRNA	lifted_all.ident
WBGene00045773|Y57G11C.70|21ur-5304	ncRNA	lifted_all.ident
WBGene00045774|Y73F8A.65|21ur-4765	ncRNA	lifted_all.ident
WBGene00045775|Y67A10A.24|21ur-710	ncRNA	lifted_all.ident
WBGene00045776|Y57G11B.14|21ur-3475	ncRNA	lifted_all.ident
WBGene00045777|C35D6.17|21ur-3137	ncRNA	lifted_all.ident
WBGene00045778|Y41E3.30|21ur-1912	ncRNA	lifted_all.ident
WBGene00045779|Y73F8A.66|21ur-3112	ncRNA	lifted_all.ident
WBGene00045780|F13G11.6|21ur-1878	ncRNA	lifted_all.ident
WBGene00045781|F13G11.7|21ur-2913	ncRNA	lifted_all.ident
WBGene00045782|Y73F8A.67|21ur-4300	ncRNA	lifted_all.ident
WBGene00045783|C27H2.8|21ur-447	ncRNA	lifted_all.ident
WBGene00045784|Y51H4A.48|21ur-1	ncRNA	lifted_all.ident
WBGene00045785|Y37A1B.26|21ur-520	ncRNA	lifted_all.ident
WBGene00045786|Y40H7A.25|21ur-1018	ncRNA	lifted_all.ident
WBGene00045787|Y57G11C.71|21ur-3818	ncRNA	lifted_all.ident
WBGene00045788|B0350.5|21ur-3836	ncRNA	lifted_all.ident
WBGene00045789|Y7A9D.5|21ur-5257	ncRNA	lifted_all.ident
WBGene00045790|ZK550.9|21ur-4773	ncRNA	lifted_all.ident
WBGene00045791|Y105C5B.52|21ur-1977	ncRNA	lifted_all.ident
WBGene00045792|Y67A10A.25|21ur-1072	ncRNA	lifted_all.ident
WBGene00045793|Y37A1A.8|21ur-3911	ncRNA	lifted_all.ident
WBGene00045794|Y73F8A.68|21ur-1550	ncRNA	lifted_all.ident
WBGene00045795|Y10G11A.6|21ur-289	ncRNA	lifted_all.ident
WBGene00045796|Y116A8A.16|21ur-3106	ncRNA	lifted_all.ident
WBGene00045797|C52D10.16|21ur-2624	ncRNA	lifted_all.ident
WBGene00045798|Y37A1B.27|21ur-5413	ncRNA	lifted_all.ident
WBGene00045799|Y57G11C.72|21ur-2826	ncRNA	lifted_all.ident
WBGene00045800|Y116A8C.59|21ur-986	ncRNA	lifted_all.ident
WBGene00045801|C55C3.10|21ur-1539	ncRNA	lifted_all.ident
WBGene00045802|Y40H7A.26|21ur-1687	ncRNA	lifted_all.ident
WBGene00045803|T06A10.8|21ur-1769	ncRNA	lifted_all.ident
WBGene00045804|Y41E3.31|21ur-1354	ncRNA	lifted_all.ident
WBGene00045805|B0273.10|21ur-3767	ncRNA	lifted_all.ident
WBGene00045806|Y73F8A.69|21ur-1413	ncRNA	lifted_all.ident
WBGene00045807|Y73F8A.70|21ur-2250	ncRNA	lifted_all.ident
WBGene00045808|Y43D4A.13|21ur-1627	ncRNA	lifted_no.ident
WBGene00045809|Y45F10D.19|21ur-630	ncRNA	lifted_all.ident
WBGene00045810|Y105C5B.53|21ur-3054	ncRNA	lifted_all.ident
WBGene00045811|Y37A1B.28|21ur-1502	ncRNA	lifted_all.ident
WBGene00045812|W03F8.13|21ur-3808	ncRNA	lifted_all.ident
WBGene00045813|Y57G11A.8|21ur-3942	ncRNA	lifted_all.ident
WBGene00045814|Y57G11C.73|21ur-5079	ncRNA	lifted_all.ident
WBGene00045815|Y40H7A.27|21ur-1284	ncRNA	lifted_all.ident
WBGene00045816|Y73F8A.71|21ur-73	ncRNA	lifted_all.ident
WBGene00045817|F55B11.11|21ur-4793	ncRNA	lifted_all.ident
WBGene00045818|T06A10.9|21ur-3584	ncRNA	lifted_all.ident
WBGene00045819|Y37A1B.29|21ur-5261	ncRNA	lifted_all.ident
WBGene00045820|Y73B6BL.48|21ur-2113	ncRNA	lifted_all.ident
WBGene00045821|Y51H4A.49|21ur-3060	ncRNA	lifted_all.ident
WBGene00045822|Y105C5A.63|21ur-4192	ncRNA	lifted_all.ident
WBGene00045823|Y105C5B.54|21ur-1895	ncRNA	lifted_all.ident
WBGene00045824|C24D10.10|21ur-4351	ncRNA	lifted_all.ident
WBGene00045825|Y105C5A.64|21ur-2587	ncRNA	lifted_all.ident
WBGene00045826|Y73F8A.72|21ur-1680	ncRNA	lifted_all.ident
WBGene00045827|Y105C5B.55|21ur-1481	ncRNA	lifted_all.ident
WBGene00045828|Y9C9A.20|21ur-5116	ncRNA	lifted_all.ident
WBGene00045829|Y37A1B.30|21ur-2034	ncRNA	lifted_all.ident
WBGene00045830|Y105C5A.65|21ur-4950	ncRNA	lifted_all.ident
WBGene00045831|Y51H4A.50|21ur-646	ncRNA	lifted_all.ident
WBGene00045832|M199.12|21ur-1037	ncRNA	lifted_all.ident
WBGene00045833|C31H1.9|21ur-4327	ncRNA	lifted_all.ident
WBGene00045834|Y40H7A.28|21ur-552	ncRNA	lifted_all.ident
WBGene00045835|R05A10.12|21ur-1249	ncRNA	lifted_all.ident
WBGene00045836|Y40H7A.29|21ur-678	ncRNA	lifted_all.ident
WBGene00045837|C47A4.11|21ur-155	ncRNA	lifted_all.ident
WBGene00045838|Y57G11A.9|21ur-2719	ncRNA	lifted_all.ident
WBGene00045839|F13G11.8|21ur-4954	ncRNA	lifted_all.ident
WBGene00045840|Y105C5B.56|21ur-2725	ncRNA	lifted_all.ident
WBGene00045841|Y37A1B.31|21ur-436	ncRNA	lifted_all.ident
WBGene00045842|LLC1.6|21ur-1438	ncRNA	lifted_all.ident
WBGene00045843|Y105C5A.66|21ur-4160	ncRNA	lifted_all.ident
WBGene00045844|Y73F8A.73|21ur-1456	ncRNA	lifted_all.ident
WBGene00045845|T06A10.10|21ur-1701	ncRNA	lifted_all.ident
WBGene00045846|Y105C5B.57|21ur-4985	ncRNA	lifted_all.ident
WBGene00045847|Y4C6A.6|21ur-4756	ncRNA	lifted_all.ident
WBGene00045848|C35D6.18|21ur-2018	ncRNA	lifted_all.ident
WBGene00045849|Y105C5B.58|21ur-5274	ncRNA	lifted_all.ident
WBGene00045850|M199.13|21ur-2286	ncRNA	lifted_all.ident
WBGene00045851|T27E7.13|21ur-3316	ncRNA	lifted_all.ident
WBGene00045852|Y57G11C.74|21ur-4338	ncRNA	lifted_all.ident
WBGene00045853|Y37A1A.9|21ur-1220	ncRNA	lifted_all.ident
WBGene00045854|Y73F8A.74|21ur-2975	ncRNA	lifted_all.ident
WBGene00045855|H04M03.16|21ur-4682	ncRNA	lifted_all.ident
WBGene00045856|C39H7.13|21ur-3638	ncRNA	lifted_all.ident
WBGene00045857|F38C2.10|21ur-2386	ncRNA	lifted_all.ident
WBGene00045858|C45E5.7|21ur-5146	ncRNA	lifted_all.ident
WBGene00045859|F26D12.3|21ur-5253	ncRNA	lifted_all.ident
WBGene00045860|Y105C5A.67|21ur-31	ncRNA	lifted_all.ident
WBGene00045861|Y105C5A.68|21ur-1147	ncRNA	lifted_all.ident
WBGene00045862|Y64G10A.24|21ur-5013	ncRNA	lifted_all.ident
WBGene00045863|T23G4.8|21ur-1894	ncRNA	lifted_all.ident
WBGene00045864|Y105C5B.59|21ur-5172	ncRNA	lifted_all.ident
WBGene00045865|Y73F8A.75|21ur-768	ncRNA	lifted_all.ident
WBGene00045866|F13G11.9|21ur-3690	ncRNA	lifted_all.ident
WBGene00045867|Y105C5A.69|21ur-880	ncRNA	lifted_all.ident
WBGene00045868|Y51H4A.51|21ur-2141	ncRNA	lifted_all.ident
WBGene00045869|C06E7.10|21ur-178	ncRNA	lifted_all.ident
WBGene00045870|Y105C5A.70|21ur-2728	ncRNA	lifted_all.ident
WBGene00045871|Y37A1B.32|21ur-4340	ncRNA	lifted_all.ident
WBGene00045872|C06E7.11|21ur-906	ncRNA	lifted_all.ident
WBGene00045873|Y64G10A.25|21ur-2345	ncRNA	lifted_all.ident
WBGene00045874|Y105C5A.71|21ur-754	ncRNA	lifted_all.ident
WBGene00045875|Y40H7A.30|21ur-58	ncRNA	lifted_all.ident
WBGene00045876|AC7.5|21ur-4409	ncRNA	lifted_all.ident
WBGene00045877|C11D2.11|21ur-2707	ncRNA	lifted_all.ident
WBGene00045878|Y40H7A.31|21ur-4669	ncRNA	lifted_all.ident
WBGene00045879|Y105C5A.72|21ur-4724	ncRNA	lifted_all.ident
WBGene00045880|Y105C5A.73|21ur-3842	ncRNA	lifted_all.ident
WBGene00045881|Y51H4A.52|21ur-3422	ncRNA	lifted_all.ident
WBGene00045882|H16O14.4|21ur-4299	ncRNA	lifted_all.ident
WBGene00045883|Y73F8A.76|21ur-752	ncRNA	lifted_all.ident
WBGene00045884|Y37A1A.10|21ur-250	ncRNA	lifted_all.ident
WBGene00045885|T23G4.9|21ur-1674	ncRNA	lifted_all.ident
WBGene00045886|C10G6.2|21ur-48	ncRNA	lifted_all.ident
WBGene00045887|Y105C5B.60|21ur-5194	ncRNA	lifted_all.ident
WBGene00045888|T06A10.11|21ur-3779	ncRNA	lifted_all.ident
WBGene00045889|Y51H4A.53|21ur-4711	ncRNA	lifted_all.ident
WBGene00045890|Y57G11B.15|21ur-5113	ncRNA	lifted_all.ident
WBGene00045891|Y57G11C.75|21ur-4772	ncRNA	lifted_all.ident
WBGene00045892|Y57G11C.76|21ur-1005	ncRNA	lifted_all.ident
WBGene00045893|Y57G11C.77|21ur-1904	ncRNA	lifted_all.ident
WBGene00045894|Y116A8C.60|21ur-3545	ncRNA	lifted_all.ident
WBGene00045895|Y105C5B.61|21ur-3246	ncRNA	lifted_all.ident
WBGene00045896|Y37A1B.33|21ur-2957	ncRNA	lifted_all.ident
WBGene00045897|Y45F10D.20|21ur-3781	ncRNA	lifted_all.ident
WBGene00045898|Y64G10A.26|21ur-1647	ncRNA	lifted_all.ident
WBGene00045899|Y57G11C.78|21ur-3253	ncRNA	lifted_all.ident
WBGene00045900|ZK616.12|21ur-3297	ncRNA	lifted_all.ident
WBGene00045901|Y57G11C.79|21ur-3291	ncRNA	lifted_all.ident
WBGene00045902|T27E7.14|21ur-793	ncRNA	lifted_all.ident
WBGene00045903|H01M01.1|21ur-1351	ncRNA	lifted_all.ident
WBGene00045904|F02H6.10|21ur-4662	ncRNA	lifted_all.ident
WBGene00045905|Y73F8A.77|21ur-5412	ncRNA	lifted_all.ident
WBGene00045906|Y57G11C.80|21ur-3674	ncRNA	lifted_all.ident
WBGene00045907|Y105C5A.74|21ur-3257	ncRNA	lifted_all.ident
WBGene00045908|Y64G10A.27|21ur-2819	ncRNA	lifted_all.ident
WBGene00045909|T06A10.12|21ur-1395	ncRNA	lifted_all.ident
WBGene00045910|C46G7.9|21ur-3768	ncRNA	lifted_all.ident
WBGene00045911|C47A4.12|21ur-3032	ncRNA	lifted_all.ident
WBGene00045912|Y105C5B.62|21ur-3577	ncRNA	lifted_all.ident
WBGene00045913|Y37A1B.34|21ur-1092	ncRNA	lifted_all.ident
WBGene00045914|Y67A10A.26|21ur-3731	ncRNA	lifted_all.ident
WBGene00045915|Y64G10A.28|21ur-4477	ncRNA	lifted_all.ident
WBGene00045916|Y7A9D.6|21ur-3434	ncRNA	lifted_all.ident
WBGene00045917|C47A4.13|21ur-1067	ncRNA	lifted_all.ident
WBGene00045918|Y51H4A.54|21ur-4420	ncRNA	lifted_all.ident
WBGene00045919|Y51H4A.55|21ur-1495	ncRNA	lifted_all.ident
WBGene00045920|Y105C5A.75|21ur-3670	ncRNA	lifted_all.ident
WBGene00045921|F02H6.11|21ur-5228	ncRNA	lifted_all.ident
WBGene00045922|Y57G11C.81|21ur-4214	ncRNA	lifted_all.ident
WBGene00045923|Y57G11B.16|21ur-3896	ncRNA	lifted_all.ident
WBGene00045924|Y57G11A.10|21ur-1345	ncRNA	lifted_all.ident
WBGene00045925|Y40H7A.32|21ur-1172	ncRNA	lifted_all.ident
WBGene00045926|Y51H4A.56|21ur-274	ncRNA	lifted_all.ident
WBGene00045927|F26D12.4|21ur-2239	ncRNA	lifted_all.ident
WBGene00045928|M03D4.8|21ur-5209	ncRNA	lifted_all.ident
WBGene00045929|Y105C5A.76|21ur-257	ncRNA	lifted_all.ident
WBGene00045930|Y67A10A.27|21ur-844	ncRNA	lifted_all.ident
WBGene00045931|T23G4.10|21ur-4427	ncRNA	lifted_all.ident
WBGene00045932|H25K10.9|21ur-1418	ncRNA	lifted_all.ident
WBGene00045933|H08M01.7|21ur-1134	ncRNA	lifted_all.ident
WBGene00045934|T23G4.11|21ur-500	ncRNA	lifted_all.ident
WBGene00045935|C10G6.3|21ur-398	ncRNA	lifted_all.ident
WBGene00045936|Y45F10D.21|21ur-5171	ncRNA	lifted_all.ident
WBGene00045937|H25K10.10|21ur-1628	ncRNA	lifted_all.ident
WBGene00045938|Y65A5A.5|21ur-4316	ncRNA	lifted_all.ident
WBGene00045939|Y57G11C.82|21ur-488	ncRNA	lifted_all.ident
WBGene00045940|H08M01.8|21ur-529	ncRNA	lifted_all.ident
WBGene00045941|Y57G11C.83|21ur-4541	ncRNA	lifted_all.ident
WBGene00045942|VY10G11R.6|21ur-188	ncRNA	lifted_all.ident
WBGene00045943|H12I19.13|21ur-1799	ncRNA	lifted_all.ident
WBGene00045944|Y105C5B.63|21ur-2825	ncRNA	lifted_all.ident
WBGene00045945|Y105C5B.64|21ur-2812	ncRNA	lifted_all.ident
WBGene00045946|C47A4.14|21ur-894	ncRNA	lifted_all.ident
WBGene00045947|Y105C5A.77|21ur-3590	ncRNA	lifted_all.ident
WBGene00045948|Y116A8A.17|21ur-4033	ncRNA	lifted_all.ident
WBGene00045949|Y57G11C.84|21ur-1113	ncRNA	lifted_all.ident
WBGene00045950|Y7A9D.7|21ur-3425	ncRNA	lifted_all.ident
WBGene00045951|Y37A1B.35|21ur-2421	ncRNA	lifted_all.ident
WBGene00045952|Y116A8B.6|21ur-2941	ncRNA	lifted_all.ident
WBGene00045953|Y67A10A.28|21ur-2023	ncRNA	lifted_all.ident
WBGene00045954|Y73B6BR.2|21ur-2048	ncRNA	lifted_all.ident
WBGene00045955|Y57G11B.17|21ur-5198	ncRNA	lifted_all.ident
WBGene00045956|Y105C5B.65|21ur-5048	ncRNA	lifted_all.ident
WBGene00045957|H25K10.11|21ur-938	ncRNA	lifted_all.ident
WBGene00045958|C45E5.8|21ur-4106	ncRNA	lifted_all.ident
WBGene00045959|T06A10.13|21ur-4442	ncRNA	lifted_all.ident
WBGene00045960|AC7.6|21ur-4804	ncRNA	lifted_all.ident
WBGene00045961|C08F11.21|21ur-164	ncRNA	lifted_all.ident
WBGene00045962|Y105C5B.66|21ur-4126	ncRNA	lifted_all.ident
WBGene00045963|B0273.11|21ur-3197	ncRNA	lifted_all.ident
WBGene00045964|Y57G11C.85|21ur-2594	ncRNA	lifted_all.ident
WBGene00045965|Y105C5A.78|21ur-4125	ncRNA	lifted_all.ident
WBGene00045966|Y10G11A.7|21ur-1954	ncRNA	lifted_all.ident
WBGene00045967|Y57G11A.11|21ur-4061	ncRNA	lifted_all.ident
WBGene00045968|LLC1.7|21ur-1524	ncRNA	lifted_all.ident
WBGene00045969|Y105C5A.79|21ur-1125	ncRNA	lifted_all.ident
WBGene00045970|Y105C5A.80|21ur-1664	ncRNA	lifted_all.ident
WBGene00045971|Y51H4A.57|21ur-3384	ncRNA	lifted_all.ident
WBGene00045972|Y116A8C.61|21ur-514	ncRNA	lifted_all.ident
WBGene00045973|T06A10.14|21ur-2657	ncRNA	lifted_all.ident
WBGene00045974|Y116A8C.62|21ur-804	ncRNA	lifted_all.ident
WBGene00045975|Y41E3.32|21ur-2206	ncRNA	lifted_all.ident
WBGene00045976|Y51H4A.58|21ur-4551	ncRNA	lifted_all.ident
WBGene00045977|Y57G11B.18|21ur-2859	ncRNA	lifted_all.ident
WBGene00045978|Y51H4A.59|21ur-463	ncRNA	lifted_all.ident
WBGene00045979|H12I19.14|21ur-544	ncRNA	lifted_all.ident
WBGene00045980|Y41E3.33|21ur-2129	ncRNA	lifted_all.ident
WBGene00045981|Y73F8A.78|21ur-992	ncRNA	lifted_all.ident
WBGene00045982|Y105C5A.81|21ur-1199	ncRNA	lifted_all.ident
WBGene00045983|B0273.12|21ur-3771	ncRNA	lifted_all.ident
WBGene00045984|Y116A8A.18|21ur-4067	ncRNA	lifted_all.ident
WBGene00045985|Y105C5A.82|21ur-1790	ncRNA	lifted_all.ident
WBGene00045986|C46G7.10|21ur-1165	ncRNA	lifted_all.ident
WBGene00045987|Y105C5B.67|21ur-1441	ncRNA	lifted_all.ident
WBGene00045988|Y41E3.34|21ur-649	ncRNA	lifted_all.ident
WBGene00045989|Y105C5B.68|21ur-584	ncRNA	lifted_all.ident
WBGene00045990|Y57G11B.19|21ur-3373	ncRNA	lifted_all.ident
WBGene00045991|Y105C5B.69|21ur-533	ncRNA	lifted_all.ident
WBGene00045992|H04M03.17|21ur-2309	ncRNA	lifted_all.ident
WBGene00045993|H08M01.9|21ur-1433	ncRNA	lifted_all.ident
WBGene00045994|R05A10.13|21ur-5323	ncRNA	lifted_all.ident
WBGene00045995|Y37A1A.11|21ur-13	ncRNA	lifted_all.ident
WBGene00045996|Y116A8A.19|21ur-2495	ncRNA	lifted_all.ident
WBGene00045997|Y41E3.35|21ur-3903	ncRNA	lifted_all.ident
WBGene00045998|Y51H4A.60|21ur-700	ncRNA	lifted_all.ident
WBGene00045999|Y105C5B.70|21ur-4243	ncRNA	lifted_all.ident
WBGene00046000|C39H7.14|21ur-4161	ncRNA	lifted_all.ident
WBGene00046001|Y105C5B.71|21ur-2801	ncRNA	lifted_all.ident
WBGene00046002|T08B6.10|21ur-3048	ncRNA	lifted_all.ident
WBGene00046003|Y51H4A.61|21ur-2997	ncRNA	lifted_all.ident
WBGene00046004|Y51H4A.62|21ur-1621	ncRNA	lifted_all.ident
WBGene00046005|Y105C5B.72|21ur-3478	ncRNA	lifted_all.ident
WBGene00046006|Y105C5B.73|21ur-2362	ncRNA	lifted_all.ident
WBGene00046007|Y40H7A.33|21ur-4055	ncRNA	lifted_all.ident
WBGene00046008|Y67A10A.29|21ur-3360	ncRNA	lifted_all.ident
WBGene00046009|R05A10.14|21ur-2849	ncRNA	lifted_all.ident
WBGene00046010|Y105C5A.83|21ur-2648	ncRNA	lifted_all.ident
WBGene00046011|F13G11.10|21ur-5342	ncRNA	lifted_all.ident
WBGene00046012|Y57G11C.86|21ur-2424	ncRNA	lifted_all.ident
WBGene00046013|Y40H7A.34|21ur-5021	ncRNA	lifted_all.ident
WBGene00046014|W03F8.14|21ur-2448	ncRNA	lifted_all.ident
WBGene00046015|Y105C5B.74|21ur-963	ncRNA	lifted_all.ident
WBGene00046016|Y73F8A.79|21ur-2994	ncRNA	lifted_all.ident
WBGene00046017|Y57G11C.87|21ur-50	ncRNA	lifted_all.ident
WBGene00046018|Y51H4A.63|21ur-4221	ncRNA	lifted_all.ident
WBGene00046019|Y40H7A.35|21ur-1857	ncRNA	lifted_all.ident
WBGene00046020|Y105C5A.84|21ur-3185	ncRNA	lifted_all.ident
WBGene00046021|Y41E3.36|21ur-76	ncRNA	lifted_all.ident
WBGene00046022|Y105C5B.75|21ur-2945	ncRNA	lifted_all.ident
WBGene00046023|Y73F8A.80|21ur-292	ncRNA	lifted_all.ident
WBGene00046024|Y73F8A.81|21ur-2625	ncRNA	lifted_all.ident
WBGene00046025|Y64G10A.29|21ur-5231	ncRNA	lifted_all.ident
WBGene00046026|Y67A10A.30|21ur-2556	ncRNA	lifted_all.ident
WBGene00046027|Y57G11C.88|21ur-2007	ncRNA	lifted_all.ident
WBGene00046028|Y51H4A.64|21ur-1881	ncRNA	lifted_all.ident
WBGene00046029|Y105C5B.76|21ur-505	ncRNA	lifted_all.ident
WBGene00046030|C11D2.12|21ur-3209	ncRNA	lifted_all.ident
WBGene00046031|Y57G11C.89|21ur-1747	ncRNA	lifted_all.ident
WBGene00046032|Y41E3.37|21ur-4085	ncRNA	lifted_all.ident
WBGene00046033|Y51H4A.65|21ur-4741	ncRNA	lifted_all.ident
WBGene00046034|C52D10.17|21ur-4381	ncRNA	lifted_all.ident
WBGene00046035|Y44C4A.1|21ur-3101	ncRNA	lifted_all.ident
WBGene00046036|W03F8.15|21ur-4419	ncRNA	lifted_all.ident
WBGene00046037|F13G11.11|21ur-1690	ncRNA	lifted_all.ident
WBGene00046038|Y67A10A.31|21ur-729	ncRNA	lifted_all.ident
WBGene00046039|C52D10.18|21ur-1340	ncRNA	lifted_all.ident
WBGene00046040|Y64G10A.30|21ur-1659	ncRNA	lifted_all.ident
WBGene00046041|Y40H7A.36|21ur-2213	ncRNA	lifted_all.ident
WBGene00046042|Y64G10A.31|21ur-2163	ncRNA	lifted_all.ident
WBGene00046043|Y105C5B.77|21ur-2794	ncRNA	lifted_all.ident
WBGene00046044|Y105C5A.85|21ur-3565	ncRNA	lifted_all.ident
WBGene00046045|Y51H4A.66|21ur-3761	ncRNA	lifted_all.ident
WBGene00046046|Y73F8A.82|21ur-1920	ncRNA	lifted_all.ident
WBGene00046047|Y57G11C.90|21ur-2923	ncRNA	lifted_all.ident
WBGene00046048|C47A4.15|21ur-869	ncRNA	lifted_all.ident
WBGene00046049|Y105C5B.78|21ur-5303	ncRNA	lifted_all.ident
WBGene00046050|F26D12.5|21ur-1865	ncRNA	lifted_all.ident
WBGene00046051|C47A4.16|21ur-631	ncRNA	lifted_all.ident
WBGene00046052|Y105C5A.86|21ur-825	ncRNA	lifted_all.ident
WBGene00046053|C35D6.19|21ur-3599	ncRNA	lifted_all.ident
WBGene00046054|Y57G11C.91|21ur-5208	ncRNA	lifted_all.ident
WBGene00046055|Y57G11B.20|21ur-1934	ncRNA	lifted_all.ident
WBGene00046056|Y105C5A.87|21ur-3544	ncRNA	lifted_all.ident
WBGene00046057|Y105C5B.79|21ur-1696	ncRNA	lifted_all.ident
WBGene00046058|ZK616.13|21ur-1274	ncRNA	lifted_all.ident
WBGene00046059|Y105C5B.80|21ur-1837	ncRNA	lifted_all.ident
WBGene00046060|Y41E3.38|21ur-2661	ncRNA	lifted_all.ident
WBGene00046061|C46G7.11|21ur-919	ncRNA	lifted_all.ident
WBGene00046062|M199.14|21ur-3336	ncRNA	lifted_all.ident
WBGene00046063|Y105C5B.81|21ur-3570	ncRNA	lifted_all.ident
WBGene00046064|Y73B6BL.49|21ur-5051	ncRNA	lifted_bad.coding
WBGene00046065|F26D10.14|21ur-1383	ncRNA	lifted_all.ident
WBGene00046066|Y64G10A.32|21ur-391	ncRNA	lifted_all.ident
WBGene00046067|Y51H4A.67|21ur-4480	ncRNA	lifted_all.ident
WBGene00046068|Y105C5A.88|21ur-1845	ncRNA	lifted_all.ident
WBGene00046069|Y73F8A.83|21ur-3010	ncRNA	lifted_all.ident
WBGene00046070|Y45F10D.22|21ur-3871	ncRNA	lifted_all.ident
WBGene00046071|F38C2.11|21ur-2883	ncRNA	lifted_all.ident
WBGene00046072|Y37A1B.36|21ur-727	ncRNA	lifted_all.ident
WBGene00046073|C47A4.17|21ur-1591	ncRNA	lifted_all.ident
WBGene00046074|Y57G11B.21|21ur-1918	ncRNA	lifted_all.ident
WBGene00046075|Y73B6BL.50|21ur-4616	ncRNA	lifted_all.ident
WBGene00046076|Y51H4A.68|21ur-5404	ncRNA	lifted_all.ident
WBGene00046077|C11D2.13|21ur-5213	ncRNA	lifted_all.ident
WBGene00046078|C31H1.10|21ur-299	ncRNA	lifted_all.ident
WBGene00046079|Y57G11C.92|21ur-1001	ncRNA	lifted_all.ident
WBGene00046080|R05A10.15|21ur-1426	ncRNA	lifted_all.ident
WBGene00046081|Y73F8A.84|21ur-4624	ncRNA	lifted_all.ident
WBGene00046082|Y41E3.39|21ur-912	ncRNA	lifted_all.ident
WBGene00046083|LLC1.8|21ur-2734	ncRNA	lifted_all.ident
WBGene00046084|C06E7.12|21ur-1042	ncRNA	lifted_all.ident
WBGene00046085|H25K10.12|21ur-23	ncRNA	lifted_all.ident
WBGene00046086|Y59E9AL.9|21ur-325	ncRNA	lifted_all.ident
WBGene00046087|Y51H4A.69|21ur-734	ncRNA	lifted_all.ident
WBGene00046088|Y105C5A.89|21ur-409	ncRNA	lifted_all.ident
WBGene00046089|Y40H7A.37|21ur-2171	ncRNA	lifted_all.ident
WBGene00046090|Y73F8A.85|21ur-5053	ncRNA	lifted_all.ident
WBGene00046091|Y73F8A.86|21ur-1566	ncRNA	lifted_all.ident
WBGene00046092|Y116A8C.63|21ur-41	ncRNA	lifted_all.ident
WBGene00046093|Y73F8A.87|21ur-2297	ncRNA	lifted_all.ident
WBGene00046094|C31H1.11|21ur-265	ncRNA	lifted_all.ident
WBGene00046095|Y105C5B.82|21ur-2391	ncRNA	lifted_all.ident
WBGene00046096|Y57G11C.93|21ur-1686	ncRNA	lifted_all.ident
WBGene00046097|B0273.13|21ur-971	ncRNA	lifted_all.ident
WBGene00046098|T23G4.12|21ur-4091	ncRNA	lifted_all.ident
WBGene00046099|Y45F10D.23|21ur-2017	ncRNA	lifted_all.ident
WBGene00046100|B0513.14|21ur-2779	ncRNA	lifted_all.ident
WBGene00046101|Y57G11B.22|21ur-146	ncRNA	lifted_all.ident
WBGene00046102|Y105C5B.83|21ur-4653	ncRNA	lifted_all.ident
WBGene00046103|VY10G11R.7|21ur-3464	ncRNA	lifted_all.ident
WBGene00046104|F44E8.5|21ur-4454	ncRNA	lifted_all.ident
WBGene00046105|Y105C5A.90|21ur-191	ncRNA	lifted_all.ident
WBGene00046106|Y116A8A.20|21ur-480	ncRNA	lifted_all.ident
WBGene00046107|LLC1.9|21ur-400	ncRNA	lifted_all.ident
WBGene00046108|F52B11.10|21ur-4846	ncRNA	lifted_all.ident
WBGene00046109|B0350.6|21ur-2935	ncRNA	lifted_all.ident
WBGene00046110|Y105C5A.91|21ur-1289	ncRNA	lifted_all.ident
WBGene00046111|Y73F8A.88|21ur-4116	ncRNA	lifted_all.ident
WBGene00046112|H32C10.5|21ur-2751	ncRNA	lifted_all.ident
WBGene00046113|F55B11.12|21ur-1190	ncRNA	lifted_all.ident
WBGene00046114|F02H6.12|21ur-2298	ncRNA	lifted_all.ident
WBGene00046115|Y73F8A.89|21ur-2939	ncRNA	lifted_all.ident
WBGene00046116|Y51H4A.70|21ur-2746	ncRNA	lifted_all.ident
WBGene00046117|F55B11.13|21ur-2479	ncRNA	lifted_all.ident
WBGene00046118|Y105C5B.84|21ur-3327	ncRNA	lifted_all.ident
WBGene00046119|Y57G11C.94|21ur-2409	ncRNA	lifted_all.ident
WBGene00046120|Y105C5B.85|21ur-3797	ncRNA	lifted_all.ident
WBGene00046121|Y105C5B.86|21ur-3554	ncRNA	lifted_all.ident
WBGene00046122|Y40H7A.38|21ur-4738	ncRNA	lifted_all.ident
WBGene00046123|Y37A1B.37|21ur-4521	ncRNA	lifted_all.ident
WBGene00046124|Y51H4A.71|21ur-2672	ncRNA	lifted_all.ident
WBGene00046125|Y51H4A.72|21ur-1236	ncRNA	lifted_all.ident
WBGene00046126|Y51H4A.73|21ur-2837	ncRNA	lifted_all.ident
WBGene00046127|Y41E3.40|21ur-3884	ncRNA	lifted_all.ident
WBGene00046128|Y57G11C.95|21ur-305	ncRNA	lifted_all.ident
WBGene00046129|Y57G11C.96|21ur-4457	ncRNA	lifted_all.ident
WBGene00046130|Y105C5A.92|21ur-3376	ncRNA	lifted_all.ident
WBGene00046131|B0513.15|21ur-2193	ncRNA	lifted_all.ident
WBGene00046132|H12I19.15|21ur-4375	ncRNA	lifted_all.ident
WBGene00046133|C27H2.9|21ur-2638	ncRNA	lifted_all.ident
WBGene00046134|Y57G11C.97|21ur-3999	ncRNA	lifted_all.ident
WBGene00046135|Y51H4A.74|21ur-1264	ncRNA	lifted_all.ident
WBGene00046136|Y116A8A.21|21ur-888	ncRNA	lifted_all.ident
WBGene00046137|Y105C5A.93|21ur-1033	ncRNA	lifted_all.ident
WBGene00046138|H08M01.10|21ur-2220	ncRNA	lifted_all.ident
WBGene00046139|C31H1.12|21ur-86	ncRNA	lifted_all.ident
WBGene00046140|C27H2.10|21ur-3206	ncRNA	lifted_all.ident
WBGene00046141|R05A10.16|21ur-487	ncRNA	lifted_all.ident
WBGene00046142|Y65A5A.6|21ur-983	ncRNA	lifted_all.ident
WBGene00046143|B0350.7|21ur-4973	ncRNA	lifted_all.ident
WBGene00046144|Y105C5A.94|21ur-3756	ncRNA	lifted_all.ident
WBGene00046145|C52D10.19|21ur-3658	ncRNA	lifted_all.ident
WBGene00046146|Y105C5B.87|21ur-3158	ncRNA	lifted_all.ident
WBGene00046147|C35D6.20|21ur-3223	ncRNA	lifted_all.ident
WBGene00046148|C31H1.13|21ur-2402	ncRNA	lifted_all.ident
WBGene00046149|Y41E3.41|21ur-225	ncRNA	lifted_all.ident
WBGene00046150|F52B11.11|21ur-4885	ncRNA	lifted_all.ident
WBGene00046151|Y105C5B.88|21ur-2319	ncRNA	lifted_all.ident
WBGene00046152|Y41E3.42|21ur-4143	ncRNA	lifted_all.ident
WBGene00046153|Y57G11C.98|21ur-4749	ncRNA	lifted_all.ident
WBGene00046154|Y73F8A.90|21ur-4599	ncRNA	lifted_all.ident
WBGene00046155|Y41E3.43|21ur-5377	ncRNA	lifted_all.ident
WBGene00046156|VY10G11R.8|21ur-1546	ncRNA	lifted_all.ident
WBGene00046157|C31H1.14|21ur-2076	ncRNA	lifted_all.ident
WBGene00046158|C35D6.21|21ur-1153	ncRNA	lifted_all.ident
WBGene00046159|Y73F8A.91|21ur-5181	ncRNA	lifted_all.ident
WBGene00046160|Y105C5A.95|21ur-1718	ncRNA	lifted_all.ident
WBGene00046161|H32C10.6|21ur-816	ncRNA	lifted_all.ident
WBGene00046162|Y105C5A.96|21ur-1402	ncRNA	lifted_all.ident
WBGene00046163|Y73F8A.92|21ur-361	ncRNA	lifted_all.ident
WBGene00046164|Y40H7A.39|21ur-5001	ncRNA	lifted_all.ident
WBGene00046165|Y51H4A.75|21ur-410	ncRNA	lifted_all.ident
WBGene00046166|Y51H4A.76|21ur-2455	ncRNA	lifted_all.ident
WBGene00046167|Y51H4A.77|21ur-2338	ncRNA	lifted_all.ident
WBGene00046168|Y57G11C.99|21ur-2603	ncRNA	lifted_all.ident
WBGene00046169|Y73F8A.93|21ur-4763	ncRNA	lifted_all.ident
WBGene00046170|C11D2.14|21ur-1512	ncRNA	lifted_all.ident
WBGene00046171|Y116A8A.22|21ur-51	ncRNA	lifted_all.ident
WBGene00046172|T06A10.15|21ur-1279	ncRNA	lifted_all.ident
WBGene00046173|Y105C5B.89|21ur-3233	ncRNA	lifted_all.ident
WBGene00046174|Y37A1B.38|21ur-653	ncRNA	lifted_all.ident
WBGene00046175|Y37A1B.39|21ur-745	ncRNA	lifted_all.ident
WBGene00046176|Y67A10B.1|21ur-3971	ncRNA	lifted_all.ident
WBGene00046177|Y116A8C.64|21ur-2344	ncRNA	lifted_all.ident
WBGene00046178|T27E7.15|21ur-1872	ncRNA	lifted_all.ident
WBGene00046179|Y73F8A.94|21ur-663	ncRNA	lifted_all.ident
WBGene00046180|Y105C5B.90|21ur-498	ncRNA	lifted_all.ident
WBGene00046181|Y51H4A.78|21ur-1650	ncRNA	lifted_all.ident
WBGene00046182|Y57G11C.100|21ur-3294	ncRNA	lifted_all.ident
WBGene00046183|Y57G11C.101|21ur-4540	ncRNA	lifted_all.ident
WBGene00046184|Y67A10A.32|21ur-491	ncRNA	lifted_all.ident
WBGene00046185|Y73F8A.95|21ur-546	ncRNA	lifted_all.ident
WBGene00046186|Y64G10A.33|21ur-1420	ncRNA	lifted_all.ident
WBGene00046187|C47A4.18|21ur-4	ncRNA	lifted_all.ident
WBGene00046188|Y116A8B.7|21ur-2647	ncRNA	lifted_all.ident
[truncated: 23,043 more rows]

## Sheet: Pseudogene
Gene	Gene_type	Liftover_status
WBGene00000021	pseudogene	lifted_all.ident
WBGene00000026	pseudogene	lifted_all.ident
WBGene00000191	pseudogene	lifted_all.ident
WBGene00000374	pseudogene	lifted_all.ident
WBGene00000642	pseudogene	lifted_all.ident
WBGene00000709	pseudogene	lifted_all.ident
WBGene00000801	pseudogene	lifted_all.ident
WBGene00001091	pseudogene	lifted_all.ident
WBGene00001111	pseudogene	lifted_all.ident
WBGene00001605	pseudogene	lifted_all.ident
WBGene00001706	pseudogene	lifted_all.ident
WBGene00001963	pseudogene	lifted_all.ident
WBGene00002006	pseudogene	lifted_all.ident
WBGene00002212	pseudogene	lifted_all.ident
WBGene00002221	pseudogene	lifted_all.ident
WBGene00003067	pseudogene	lifted_all.ident
WBGene00003420	pseudogene	lifted_all.ident
WBGene00003433	pseudogene	lifted_all.ident
WBGene00003437	pseudogene	lifted_all.ident
WBGene00003445	pseudogene	lifted_all.ident
WBGene00003460	pseudogene	lifted_all.ident
WBGene00003556	pseudogene	lifted_all.ident
WBGene00003665	pseudogene	lifted_all.ident
WBGene00003673	pseudogene	lifted_all.ident
WBGene00004009	pseudogene	lifted_all.ident
WBGene00004041	pseudogene	lifted_no.ident
WBGene00004054	pseudogene	lifted_all.ident
WBGene00004179	pseudogene	lifted_all.ident
WBGene00004240	pseudogene	lifted_all.ident
WBGene00004246	pseudogene	lifted_all.ident
WBGene00004677	pseudogene	lifted_all.ident
WBGene00004817	pseudogene	lifted_all.ident
WBGene00004851	pseudogene	lifted_all.ident
WBGene00004903	pseudogene	lifted_all.ident
WBGene00004907	pseudogene	lifted_all.ident
WBGene00005031	pseudogene	lifted_all.ident
WBGene00005041	pseudogene	lifted_all.ident
WBGene00005042	pseudogene	lifted_all.ident
WBGene00005045	pseudogene	lifted_all.ident
WBGene00005069	pseudogene	lifted_all.ident
WBGene00005074	pseudogene	lifted_all.ident
WBGene00005075	pseudogene	lifted_all.ident
WBGene00005084	pseudogene	lifted_all.ident
WBGene00005092	pseudogene	lifted_all.ident
WBGene00005100	pseudogene	lifted_all.ident
WBGene00005102	pseudogene	lifted_all.ident
WBGene00005115	pseudogene	lifted_all.ident
WBGene00005130	pseudogene	lifted_all.ident
WBGene00005139	pseudogene	lifted_all.ident
WBGene00005175	pseudogene	lifted_all.ident
WBGene00005176	pseudogene	lifted_all.ident
WBGene00005192	pseudogene	lifted_all.ident
WBGene00005200	pseudogene	lifted_all.ident
WBGene00005206	pseudogene	lifted_all.ident
WBGene00005220	pseudogene	lifted_all.ident
WBGene00005232	pseudogene	lifted_all.ident
WBGene00005235	pseudogene	lifted_all.ident
WBGene00005238	pseudogene	lifted_all.ident
WBGene00005239	pseudogene	lifted_all.ident
WBGene00005252	pseudogene	lifted_all.ident
WBGene00005266	pseudogene	lifted_all.ident
WBGene00005276	pseudogene	lifted_all.ident
WBGene00005277	pseudogene	lifted_all.ident
WBGene00005286	pseudogene	lifted_all.ident
WBGene00005287	pseudogene	lifted_all.ident
WBGene00005298	pseudogene	lifted_all.ident
WBGene00005302	pseudogene	lifted_all.ident
WBGene00005305	pseudogene	lifted_all.ident
WBGene00005307	pseudogene	lifted_all.ident
WBGene00005311	pseudogene	lifted_all.ident
WBGene00005312	pseudogene	lifted_all.ident
WBGene00005314	pseudogene	lifted_all.ident
WBGene00005320	pseudogene	lifted_all.ident
WBGene00005322	pseudogene	lifted_all.ident
WBGene00005325	pseudogene	lifted_all.ident
WBGene00005326	pseudogene	lifted_all.ident
WBGene00005327	pseudogene	lifted_all.ident
WBGene00005329	pseudogene	lifted_all.ident
WBGene00005333	pseudogene	lifted_all.ident
WBGene00005336	pseudogene	lifted_all.ident
WBGene00005343	pseudogene	lifted_all.ident
WBGene00005360	pseudogene	lifted_all.ident
WBGene00005366	pseudogene	lifted_all.ident
WBGene00005367	pseudogene	lifted_all.ident
WBGene00005368	pseudogene	lifted_all.ident
WBGene00005369	pseudogene	lifted_all.ident
WBGene00005371	pseudogene	lifted_all.ident
WBGene00005372	pseudogene	lifted_all.ident
WBGene00005373	pseudogene	lifted_all.ident
WBGene00005374	pseudogene	lifted_all.ident
WBGene00005376	pseudogene	lifted_all.ident
WBGene00005377	pseudogene	lifted_all.ident
WBGene00005378	pseudogene	lifted_all.ident
WBGene00005379	pseudogene	lifted_all.ident
WBGene00005380	pseudogene	lifted_all.ident
WBGene00005381	pseudogene	lifted_all.ident
WBGene00005384	pseudogene	lifted_all.ident
WBGene00005391	pseudogene	lifted_all.ident
WBGene00005403	pseudogene	lifted_all.ident
WBGene00005409	pseudogene	lifted_all.ident
WBGene00005413	pseudogene	lifted_all.ident
WBGene00005420	pseudogene	lifted_all.ident
WBGene00005431	pseudogene	lifted_all.ident
WBGene00005434	pseudogene	lifted_all.ident
WBGene00005438	pseudogene	lifted_all.ident
WBGene00005445	pseudogene	lifted_all.ident
WBGene00005455	pseudogene	lifted_all.ident
WBGene00005459	pseudogene	lifted_all.ident
WBGene00005460	pseudogene	lifted_all.ident
WBGene00005462	pseudogene	lifted_all.ident
WBGene00005465	pseudogene	lifted_all.ident
WBGene00005466	pseudogene	lifted_all.ident
WBGene00005467	pseudogene	lifted_all.ident
WBGene00005468	pseudogene	lifted_all.ident
WBGene00005469	pseudogene	lifted_all.ident
WBGene00005473	pseudogene	lifted_all.ident
WBGene00005483	pseudogene	lifted_all.ident
WBGene00005485	pseudogene	lifted_all.ident
WBGene00005498	pseudogene	lifted_all.ident
WBGene00005506	pseudogene	lifted_all.ident
WBGene00005510	pseudogene	lifted_all.ident
WBGene00005511	pseudogene	lifted_all.ident
WBGene00005515	pseudogene	lifted_all.ident
WBGene00005520	pseudogene	lifted_all.ident
WBGene00005534	pseudogene	lifted_all.ident
WBGene00005535	pseudogene	lifted_all.ident
WBGene00005547	pseudogene	lifted_all.ident
WBGene00005553	pseudogene	lifted_all.ident
WBGene00005556	pseudogene	lifted_all.ident
WBGene00005561	pseudogene	lifted_all.ident
WBGene00005564	pseudogene	lifted_all.ident
WBGene00005567	pseudogene	lifted_all.ident
WBGene00005568	pseudogene	lifted_all.ident
WBGene00005570	pseudogene	lifted_all.ident
WBGene00005571	pseudogene	lifted_all.ident
WBGene00005576	pseudogene	lifted_all.ident
WBGene00005580	pseudogene	lifted_all.ident
WBGene00005587	pseudogene	lifted_all.ident
WBGene00005588	pseudogene	lifted_all.ident
WBGene00005600	pseudogene	lifted_all.ident
WBGene00005604	pseudogene	lifted_all.ident
WBGene00005605	pseudogene	lifted_all.ident
WBGene00005619	pseudogene	lifted_no.ident
WBGene00005620	pseudogene	lifted_all.ident
WBGene00005630	pseudogene	lifted_all.ident
WBGene00005646	pseudogene	lifted_all.ident
WBGene00005650	pseudogene	lifted_all.ident
WBGene00005651	pseudogene	lifted_all.ident
WBGene00005656	pseudogene	lifted_all.ident
WBGene00005668	pseudogene	lifted_all.ident
WBGene00005673	pseudogene	lifted_all.ident
WBGene00005677	pseudogene	lifted_all.ident
WBGene00005695	pseudogene	lifted_all.ident
WBGene00005696	pseudogene	lifted_all.ident
WBGene00005697	pseudogene	lifted_all.ident
WBGene00005704	pseudogene	lifted_all.ident
WBGene00005706	pseudogene	lifted_all.ident
WBGene00005709	pseudogene	lifted_all.ident
WBGene00005729	pseudogene	lifted_all.ident
WBGene00005731	pseudogene	lifted_all.ident
WBGene00005734	pseudogene	lifted_all.ident
WBGene00005746	pseudogene	lifted_all.ident
WBGene00005747	pseudogene	lifted_all.ident
WBGene00005752	pseudogene	lifted_all.ident
WBGene00005765	pseudogene	lifted_all.ident
WBGene00005772	pseudogene	lifted_all.ident
WBGene00005774	pseudogene	lifted_all.ident
WBGene00005775	pseudogene	lifted_all.ident
WBGene00005777	pseudogene	lifted_no.ident
WBGene00005784	pseudogene	lifted_all.ident
WBGene00005792	pseudogene	lifted_all.ident
WBGene00005793	pseudogene	lifted_all.ident
WBGene00005794	pseudogene	lifted_all.ident
WBGene00005796	pseudogene	lifted_all.ident
WBGene00005797	pseudogene	lifted_all.ident
WBGene00005799	pseudogene	lifted_all.ident
WBGene00005805	pseudogene	lifted_all.ident
WBGene00005811	pseudogene	lifted_all.ident
WBGene00005812	pseudogene	lifted_all.ident
WBGene00005817	pseudogene	lifted_all.ident
WBGene00005821	pseudogene	lifted_all.ident
WBGene00005822	pseudogene	lifted_all.ident
WBGene00005825	pseudogene	lifted_all.ident
WBGene00005827	pseudogene	lifted_all.ident
WBGene00005828	pseudogene	lifted_no.ident
WBGene00005839	pseudogene	lifted_all.ident
WBGene00005840	pseudogene	lifted_all.ident
WBGene00005843	pseudogene	lifted_all.ident
WBGene00005851	pseudogene	lifted_all.ident
WBGene00005852	pseudogene	lifted_all.ident
WBGene00005853	pseudogene	lifted_all.ident
WBGene00005857	pseudogene	lifted_all.ident
WBGene00005861	pseudogene	lifted_all.ident
WBGene00005863	pseudogene	lifted_all.ident
WBGene00005872	pseudogene	lifted_all.ident
WBGene00005873	pseudogene	lifted_all.ident
WBGene00005875	pseudogene	lifted_all.ident
WBGene00005878	pseudogene	lifted_all.ident
WBGene00005879	pseudogene	lifted_all.ident
WBGene00005902	pseudogene	lifted_all.ident
WBGene00005906	pseudogene	lifted_all.ident
WBGene00005916	pseudogene	lifted_all.ident
WBGene00005918	pseudogene	lifted_all.ident
WBGene00005921	pseudogene	lifted_all.ident
WBGene00005926	pseudogene	lifted_all.ident
WBGene00005928	pseudogene	lifted_all.ident
WBGene00005940	pseudogene	lifted_all.ident
WBGene00005943	pseudogene	lifted_all.ident
WBGene00005944	pseudogene	lifted_all.ident
WBGene00005946	pseudogene	lifted_all.ident
WBGene00005948	pseudogene	lifted_all.ident
WBGene00005952	pseudogene	lifted_all.ident
WBGene00005960	pseudogene	lifted_all.ident
WBGene00005961	pseudogene	lifted_all.ident
WBGene00005962	pseudogene	lifted_all.ident
WBGene00005963	pseudogene	lifted_all.ident
WBGene00005966	pseudogene	lifted_all.ident
WBGene00005970	pseudogene	lifted_all.ident
WBGene00005972	pseudogene	lifted_all.ident
WBGene00005974	pseudogene	lifted_all.ident
WBGene00005980	pseudogene	lifted_all.ident
WBGene00005982	pseudogene	lifted_all.ident
WBGene00005985	pseudogene	lifted_all.ident
WBGene00005990	pseudogene	lifted_all.ident
WBGene00005991	pseudogene	lifted_all.ident
WBGene00005994	pseudogene	lifted_all.ident
WBGene00005997	pseudogene	lifted_all.ident
WBGene00005998	pseudogene	lifted_all.ident
WBGene00006000	pseudogene	lifted_all.ident
WBGene00006014	pseudogene	lifted_all.ident
WBGene00006015	pseudogene	lifted_all.ident
WBGene00006017	pseudogene	lifted_all.ident
WBGene00006018	pseudogene	lifted_all.ident
WBGene00006023	pseudogene	lifted_all.ident
WBGene00006029	pseudogene	lifted_all.ident
WBGene00006057	pseudogene	lifted_all.ident
WBGene00006079	pseudogene	lifted_all.ident
WBGene00006088	pseudogene	lifted_all.ident
WBGene00006089	pseudogene	lifted_all.ident
WBGene00006091	pseudogene	lifted_all.ident
WBGene00006095	pseudogene	lifted_all.ident
WBGene00006100	pseudogene	lifted_all.ident
WBGene00006107	pseudogene	lifted_all.ident
WBGene00006114	pseudogene	lifted_all.ident
WBGene00006115	pseudogene	lifted_all.ident
WBGene00006116	pseudogene	lifted_all.ident
WBGene00006118	pseudogene	lifted_all.ident
WBGene00006119	pseudogene	lifted_all.ident
WBGene00006123	pseudogene	lifted_all.ident
WBGene00006132	pseudogene	lifted_all.ident
WBGene00006168	pseudogene	lifted_all.ident
WBGene00006177	pseudogene	lifted_all.ident
WBGene00006181	pseudogene	lifted_all.ident
WBGene00006185	pseudogene	lifted_all.ident
WBGene00006194	pseudogene	lifted_all.ident
WBGene00006223	pseudogene	lifted_all.ident
WBGene00006227	pseudogene	lifted_all.ident
WBGene00006243	pseudogene	lifted_all.ident
WBGene00006245	pseudogene	lifted_all.ident
WBGene00006246	pseudogene	lifted_all.ident
WBGene00006248	pseudogene	lifted_all.ident
WBGene00006250	pseudogene	lifted_all.ident
WBGene00006254	pseudogene	lifted_all.ident
WBGene00006255	pseudogene	lifted_all.ident
WBGene00006267	pseudogene	lifted_all.ident
WBGene00006269	pseudogene	lifted_all.ident
WBGene00006285	pseudogene	lifted_all.ident
WBGene00006895	pseudogene	lifted_all.ident
WBGene00006939	pseudogene	lifted_all.ident
WBGene00007066	pseudogene	lifted_all.ident
WBGene00007074	pseudogene	lifted_all.ident
WBGene00007077	pseudogene	lifted_all.ident
WBGene00007078	pseudogene	lifted_all.ident
WBGene00007120	pseudogene	lifted_all.ident
WBGene00007121	pseudogene	lifted_all.ident
WBGene00007147	pseudogene	lifted_all.ident
WBGene00007151	pseudogene	lifted_all.ident
WBGene00007160	pseudogene	lifted_all.ident
WBGene00007161	pseudogene	lifted_all.ident
WBGene00007165	pseudogene	lifted_all.ident
WBGene00007181	pseudogene	lifted_all.ident
WBGene00007198	pseudogene	lifted_all.ident
WBGene00007199	pseudogene	lifted_all.ident
WBGene00007238	pseudogene	lifted_all.ident
WBGene00007300	pseudogene	lifted_all.ident
WBGene00007373	pseudogene	lifted_all.ident
WBGene00007376	pseudogene	lifted_all.ident
WBGene00007379	pseudogene	lifted_all.ident
WBGene00007380	pseudogene	lifted_all.ident
WBGene00007451	pseudogene	lifted_all.ident
WBGene00007461	pseudogene	lifted_all.ident
WBGene00007468	pseudogene	lifted_all.ident
WBGene00007481	pseudogene	lifted_all.ident
WBGene00007578	pseudogene	lifted_all.ident
WBGene00007654	pseudogene	lifted_all.ident
WBGene00007667	pseudogene	lifted_all.ident
WBGene00007676	pseudogene	lifted_all.ident
WBGene00007677	pseudogene	lifted_all.ident
WBGene00007715	pseudogene	lifted_all.ident
WBGene00007721	pseudogene	lifted_all.ident
WBGene00007754	pseudogene	lifted_all.ident
WBGene00007767	pseudogene	lifted_all.ident
WBGene00007798	pseudogene	lifted_all.ident
WBGene00007821	pseudogene	lifted_all.ident
WBGene00007838	pseudogene	lifted_all.ident
WBGene00007870	pseudogene	lifted_all.ident
WBGene00007889	pseudogene	lifted_all.ident
WBGene00007899	pseudogene	lifted_all.ident
WBGene00007902	pseudogene	lifted_all.ident
WBGene00007962	pseudogene	lifted_all.ident
WBGene00008013	pseudogene	lifted_all.ident
WBGene00008026	pseudogene	lifted_all.ident
WBGene00008048	pseudogene	lifted_all.ident
WBGene00008055	pseudogene	lifted_all.ident
WBGene00008083	pseudogene	lifted_all.ident
WBGene00008098	pseudogene	lifted_all.ident
WBGene00008112	pseudogene	lifted_all.ident
WBGene00008192	pseudogene	lifted_all.ident
WBGene00008193	pseudogene	lifted_all.ident
WBGene00008253	pseudogene	lifted_all.ident
WBGene00008282	pseudogene	lifted_all.ident
WBGene00008306	pseudogene	lifted_all.ident
WBGene00008325	pseudogene	lifted_all.ident
WBGene00008328	pseudogene	lifted_all.ident
WBGene00008337	pseudogene	lifted_all.ident
WBGene00008349	pseudogene	lifted_no.ident
WBGene00008350	pseudogene	lifted_no.ident
WBGene00008351	pseudogene	lifted_all.ident
WBGene00008373	pseudogene	lifted_all.ident
WBGene00008374	pseudogene	lifted_all.ident
WBGene00008465	pseudogene	lifted_all.ident
WBGene00008487	pseudogene	lifted_all.ident
WBGene00008501	pseudogene	lifted_all.ident
WBGene00008534	pseudogene	lifted_all.ident
WBGene00008537	pseudogene	lifted_all.ident
WBGene00008635	pseudogene	lifted_all.ident
WBGene00008638	pseudogene	lifted_all.ident
WBGene00008657	pseudogene	lifted_all.ident
WBGene00008658	pseudogene	lifted_all.ident
WBGene00008723	pseudogene	lifted_all.ident
WBGene00008791	pseudogene	lifted_all.ident
WBGene00008813	pseudogene	lifted_all.ident
WBGene00008827	pseudogene	lifted_all.ident
WBGene00008828	pseudogene	lifted_all.ident
WBGene00008842	pseudogene	lifted_all.ident
WBGene00008873	pseudogene	lifted_all.ident
WBGene00008933	pseudogene	lifted_all.ident
WBGene00008941	pseudogene	lifted_all.ident
WBGene00008942	pseudogene	lifted_all.ident
WBGene00008943	pseudogene	lifted_all.ident
WBGene00008966	pseudogene	lifted_all.ident
WBGene00008983	pseudogene	lifted_all.ident
WBGene00009019	pseudogene	lifted_all.ident
WBGene00009020	pseudogene	lifted_all.ident
WBGene00009047	pseudogene	lifted_all.ident
WBGene00009055	pseudogene	lifted_all.ident
WBGene00009071	pseudogene	lifted_all.ident
WBGene00009076	pseudogene	lifted_all.ident
WBGene00009104	pseudogene	lifted_all.ident
WBGene00009197	pseudogene	lifted_all.ident
WBGene00009210	pseudogene	lifted_all.ident
WBGene00009230	pseudogene	lifted_all.ident
WBGene00009249	pseudogene	lifted_all.ident
WBGene00009295	pseudogene	lifted_all.ident
WBGene00009309	pseudogene	lifted_all.ident
WBGene00009310	pseudogene	lifted_all.ident
WBGene00009411	pseudogene	lifted_all.ident
WBGene00009414	pseudogene	lifted_all.ident
WBGene00009419	pseudogene	lifted_all.ident
WBGene00009425	pseudogene	lifted_all.ident
WBGene00009428	pseudogene	lifted_all.ident
WBGene00009472	pseudogene	lifted_all.ident
WBGene00009474	pseudogene	lifted_all.ident
WBGene00009570	pseudogene	lifted_all.ident
WBGene00009590	pseudogene	lifted_all.ident
WBGene00009598	pseudogene	lifted_all.ident
WBGene00009631	pseudogene	lifted_all.ident
WBGene00009651	pseudogene	lifted_all.ident
WBGene00009656	pseudogene	lifted_all.ident
WBGene00009693	pseudogene	lifted_all.ident
WBGene00009697	pseudogene	lifted_all.ident
WBGene00009752	pseudogene	lifted_all.ident
WBGene00009757	pseudogene	lifted_all.ident
WBGene00009764	pseudogene	lifted_all.ident
WBGene00009786	pseudogene	lifted_all.ident
WBGene00009828	pseudogene	lifted_all.ident
WBGene00009837	pseudogene	lifted_all.ident
WBGene00009838	pseudogene	lifted_all.ident
WBGene00009846	pseudogene	lifted_all.ident
WBGene00009864	pseudogene	lifted_all.ident
WBGene00009894	pseudogene	lifted_all.ident
WBGene00009910	pseudogene	lifted_all.ident
WBGene00009911	pseudogene	lifted_all.ident
WBGene00009954	pseudogene	lifted_all.ident
WBGene00009972	pseudogene	lifted_all.ident
WBGene00009991	pseudogene	lifted_all.ident
WBGene00010024	pseudogene	lifted_all.ident
WBGene00010092	pseudogene	lifted_all.ident
WBGene00010095	pseudogene	lifted_all.ident
WBGene00010112	pseudogene	lifted_all.ident
WBGene00010176	pseudogene	lifted_all.ident
WBGene00010209	pseudogene	lifted_all.ident
WBGene00010240	pseudogene	lifted_all.ident
WBGene00010271	pseudogene	lifted_all.ident
WBGene00010294	pseudogene	lifted_all.ident
WBGene00010295	pseudogene	lifted_all.ident
WBGene00010313	pseudogene	lifted_all.ident
WBGene00010371	pseudogene	lifted_all.ident
WBGene00010390	pseudogene	lifted_all.ident
WBGene00010395	pseudogene	lifted_all.ident
WBGene00010400	pseudogene	lifted_all.ident
WBGene00010402	pseudogene	lifted_all.ident
WBGene00010463	pseudogene	lifted_all.ident
WBGene00010517	pseudogene	lifted_all.ident
WBGene00010518	pseudogene	lifted_all.ident
WBGene00010529	pseudogene	lifted_all.ident
WBGene00010535	pseudogene	lifted_all.ident
WBGene00010536	pseudogene	lifted_all.ident
WBGene00010543	pseudogene	lifted_all.ident
WBGene00010598	pseudogene	lifted_all.ident
WBGene00010618	pseudogene	lifted_all.ident
WBGene00010753	pseudogene	lifted_all.ident
WBGene00010804	pseudogene	lifted_all.ident
WBGene00010818	pseudogene	lifted_all.ident
WBGene00010824	pseudogene	lifted_all.ident
WBGene00010921	pseudogene	lifted_all.ident
WBGene00010927	pseudogene	lifted_all.ident
WBGene00010930	pseudogene	lifted_all.ident
WBGene00010932	pseudogene	lifted_all.ident
WBGene00010952	pseudogene	lifted_all.ident
WBGene00011007	pseudogene	lifted_all.ident
WBGene00011022	pseudogene	lifted_all.ident
WBGene00011149	pseudogene	lifted_all.ident
WBGene00011160	pseudogene	lifted_all.ident
WBGene00011165	pseudogene	lifted_all.ident
WBGene00011174	pseudogene	lifted_all.ident
WBGene00011178	pseudogene	lifted_all.ident
WBGene00011210	pseudogene	lifted_all.ident
WBGene00011294	pseudogene	lifted_all.ident
WBGene00011357	pseudogene	lifted_all.ident
WBGene00011369	pseudogene	lifted_all.ident
WBGene00011395	pseudogene	lifted_all.ident
WBGene00011405	pseudogene	lifted_no.ident
WBGene00011421	pseudogene	lifted_all.ident
WBGene00011448	pseudogene	lifted_all.ident
WBGene00011459	pseudogene	lifted_all.ident
WBGene00011483	pseudogene	lifted_all.ident
WBGene00011514	pseudogene	lifted_all.ident
WBGene00011549	pseudogene	lifted_all.ident
WBGene00011550	pseudogene	lifted_no.ident
WBGene00011567	pseudogene	lifted_all.ident
WBGene00011585	pseudogene	lifted_all.ident
WBGene00011599	pseudogene	lifted_all.ident
WBGene00011607	pseudogene	lifted_all.ident
WBGene00011608	pseudogene	lifted_all.ident
WBGene00011617	pseudogene	lifted_all.ident
WBGene00011619	pseudogene	lifted_all.ident
WBGene00011627	pseudogene	lifted_all.ident
WBGene00011628	pseudogene	lifted_all.ident
WBGene00011660	pseudogene	lifted_all.ident
WBGene00011686	pseudogene	lifted_all.ident
WBGene00011690	pseudogene	lifted_all.ident
WBGene00011703	pseudogene	lifted_all.ident
WBGene00011714	pseudogene	lifted_all.ident
WBGene00011716	pseudogene	lifted_all.ident
WBGene00011721	pseudogene	lifted_all.ident
WBGene00011728	pseudogene	lifted_all.ident
WBGene00011748	pseudogene	lifted_all.ident
WBGene00011818	pseudogene	lifted_all.ident
WBGene00011842	pseudogene	lifted_all.ident
WBGene00011851	pseudogene	lifted_all.ident
WBGene00011933	pseudogene	lifted_all.ident
WBGene00011947	pseudogene	lifted_all.ident
WBGene00012047	pseudogene	lifted_all.ident
WBGene00012048	pseudogene	lifted_all.ident
WBGene00012053	pseudogene	lifted_all.ident
WBGene00012058	pseudogene	lifted_no.ident
WBGene00012078	pseudogene	lifted_all.ident
WBGene00012079	pseudogene	lifted_all.ident
WBGene00012080	pseudogene	lifted_all.ident
WBGene00012098	pseudogene	lifted_all.ident
WBGene00012133	pseudogene	lifted_all.ident
WBGene00012147	pseudogene	lifted_all.ident
WBGene00012189	pseudogene	lifted_all.ident
WBGene00012218	pseudogene	lifted_all.ident
WBGene00012320	pseudogene	lifted_all.ident
WBGene00012355	pseudogene	lifted_all.ident
WBGene00012368	pseudogene	lifted_all.ident
WBGene00012384	pseudogene	lifted_no.ident
WBGene00012403	pseudogene	lifted_all.ident
WBGene00012418	pseudogene	lifted_all.ident
WBGene00012419	pseudogene	lifted_all.ident
WBGene00012426	pseudogene	lifted_all.ident
WBGene00012453	pseudogene	lifted_all.ident
WBGene00012485	pseudogene	lifted_all.ident
WBGene00012493	pseudogene	lifted_all.ident
WBGene00012498	pseudogene	lifted_no.ident
WBGene00012499	pseudogene	lifted_no.ident
WBGene00012517	pseudogene	lifted_all.ident
WBGene00012519	pseudogene	lifted_all.ident
WBGene00012568	pseudogene	lifted_all.ident
WBGene00012569	pseudogene	lifted_all.ident
WBGene00012572	pseudogene	lifted_all.ident
WBGene00012573	pseudogene	lifted_all.ident
WBGene00012588	pseudogene	lifted_all.ident
WBGene00012618	pseudogene	lifted_all.ident
WBGene00012620	pseudogene	lifted_all.ident
WBGene00012623	pseudogene	lifted_all.ident
WBGene00012679	pseudogene	lifted_all.ident
WBGene00012680	pseudogene	lifted_all.ident
WBGene00012690	pseudogene	lifted_all.ident
WBGene00012706	pseudogene	lifted_all.ident
WBGene00012745	pseudogene	lifted_all.ident
WBGene00012746	pseudogene	lifted_all.ident
WBGene00012749	pseudogene	lifted_all.ident
WBGene00012793	pseudogene	lifted_all.ident
WBGene00012817	pseudogene	lifted_all.ident
WBGene00012870	pseudogene	lifted_all.ident
WBGene00012876	pseudogene	lifted_all.ident
WBGene00012898	pseudogene	lifted_all.ident
WBGene00012924	pseudogene	lifted_all.ident
WBGene00012954	pseudogene	lifted_all.ident
WBGene00012956	pseudogene	lifted_all.ident
WBGene00012974	pseudogene	lifted_all.ident
WBGene00012975	pseudogene	lifted_all.ident
WBGene00013031	pseudogene	lifted_all.ident
WBGene00013032	pseudogene	lifted_all.ident
WBGene00013051	pseudogene	lifted_all.ident
WBGene00013056	pseudogene	lifted_all.ident
WBGene00013059	pseudogene	lifted_all.ident
WBGene00013112	pseudogene	lifted_all.ident
WBGene00013113	pseudogene	lifted_all.ident
WBGene00013114	pseudogene	lifted_all.ident
WBGene00013134	pseudogene	lifted_all.ident
WBGene00013153	pseudogene	lifted_all.ident
WBGene00013155	pseudogene	lifted_all.ident
WBGene00013251	pseudogene	lifted_all.ident
WBGene00013283	pseudogene	lifted_all.ident
WBGene00013313	pseudogene	lifted_all.ident
WBGene00013316	pseudogene	lifted_all.ident
WBGene00013320	pseudogene	lifted_all.ident
WBGene00013341	pseudogene	lifted_all.ident
WBGene00013363	pseudogene	lifted_all.ident
WBGene00013369	pseudogene	lifted_all.ident
WBGene00013372	pseudogene	lifted_all.ident
WBGene00013410	pseudogene	lifted_all.ident
WBGene00013467	pseudogene	lifted_all.ident
WBGene00013494	pseudogene	lifted_all.ident
WBGene00013495	pseudogene	lifted_all.ident
WBGene00013510	pseudogene	lifted_all.ident
WBGene00013535	pseudogene	lifted_all.ident
WBGene00013537	pseudogene	lifted_all.ident
WBGene00013571	pseudogene	lifted_all.ident
WBGene00013589	pseudogene	lifted_all.ident
WBGene00013612	pseudogene	lifted_all.ident
WBGene00013614	pseudogene	lifted_no.ident
WBGene00013615	pseudogene	lifted_all.ident
WBGene00013617	pseudogene	lifted_all.ident
WBGene00013618	pseudogene	lifted_all.ident
WBGene00013624	pseudogene	lifted_all.ident
WBGene00013625	pseudogene	lifted_all.ident
WBGene00013627	pseudogene	lifted_all.ident
WBGene00013638	pseudogene	lifted_all.ident
WBGene00013644	pseudogene	lifted_all.ident
WBGene00013648	pseudogene	lifted_all.ident
WBGene00013652	pseudogene	lifted_all.ident
WBGene00013661	pseudogene	lifted_all.ident
WBGene00013706	pseudogene	lifted_all.ident
WBGene00013707	pseudogene	lifted_all.ident
WBGene00013722	pseudogene	lifted_no.ident
WBGene00013763	pseudogene	lifted_all.ident
WBGene00013770	pseudogene	lifted_all.ident
WBGene00013772	pseudogene	lifted_all.ident
WBGene00013783	pseudogene	lifted_all.ident
WBGene00013788	pseudogene	lifted_all.ident
WBGene00013821	pseudogene	lifted_all.ident
WBGene00013826	pseudogene	lifted_no.ident
WBGene00013827	pseudogene	lifted_all.ident
WBGene00013841	pseudogene	lifted_all.ident
WBGene00013842	pseudogene	lifted_all.ident
WBGene00013843	pseudogene	lifted_all.ident
WBGene00013942	pseudogene	lifted_all.ident
WBGene00013995	pseudogene	lifted_all.ident
WBGene00014005	pseudogene	lifted_all.ident
WBGene00014134	pseudogene	lifted_no.ident
WBGene00014180	pseudogene	lifted_all.ident
WBGene00014185	pseudogene	lifted_all.ident
WBGene00014294	pseudogene	lifted_all.ident
WBGene00014307	pseudogene	lifted_all.ident
WBGene00014308	pseudogene	lifted_all.ident
WBGene00014309	pseudogene	lifted_all.ident
WBGene00014375	pseudogene	lifted_all.ident
WBGene00014516	pseudogene	lifted_all.ident
WBGene00014562	pseudogene	lifted_all.ident
WBGene00014576	pseudogene	lifted_all.ident
WBGene00014613	pseudogene	lifted_all.ident
WBGene00014615	pseudogene	lifted_all.ident
WBGene00014641	pseudogene	lifted_all.ident
WBGene00014643	pseudogene	lifted_all.ident
WBGene00014644	pseudogene	lifted_all.ident
WBGene00014645	pseudogene	lifted_all.ident
WBGene00014646	pseudogene	lifted_all.ident
WBGene00014647	pseudogene	lifted_all.ident
WBGene00014648	pseudogene	lifted_all.ident
WBGene00014649	pseudogene	lifted_all.ident
WBGene00014650	pseudogene	lifted_all.ident
WBGene00014651	pseudogene	lifted_all.ident
WBGene00014652	pseudogene	lifted_all.ident
WBGene00014653	pseudogene	lifted_all.ident
WBGene00014654	pseudogene	lifted_all.ident
WBGene00014655	pseudogene	lifted_all.ident
WBGene00014656	pseudogene	lifted_all.ident
WBGene00014657	pseudogene	lifted_all.ident
WBGene00014658	pseudogene	lifted_all.ident
WBGene00014659	pseudogene	lifted_all.ident
WBGene00014660	pseudogene	lifted_all.ident
WBGene00014663	pseudogene	lifted_all.ident
WBGene00014664	pseudogene	lifted_all.ident
WBGene00014665	pseudogene	lifted_all.ident
WBGene00014667	pseudogene	lifted_all.ident
WBGene00014670	pseudogene	lifted_all.ident
WBGene00014671	pseudogene	lifted_all.ident
WBGene00014672	pseudogene	lifted_all.ident
WBGene00014673	pseudogene	lifted_all.ident
WBGene00014674	pseudogene	lifted_no.ident
WBGene00014675	pseudogene	lifted_all.ident
WBGene00014676	pseudogene	lifted_all.ident
WBGene00014677	pseudogene	lifted_all.ident
WBGene00014678	pseudogene	lifted_all.ident
WBGene00014681	pseudogene	lifted_all.ident
WBGene00014682	pseudogene	lifted_all.ident
WBGene00014683	pseudogene	lifted_all.ident
WBGene00014684	pseudogene	lifted_all.ident
WBGene00014685	pseudogene	lifted_all.ident
WBGene00014686	pseudogene	lifted_all.ident
WBGene00014689	pseudogene	lifted_all.ident
WBGene00014691	pseudogene	lifted_all.ident
WBGene00014692	pseudogene	lifted_all.ident
WBGene00014693	pseudogene	lifted_all.ident
WBGene00014694	pseudogene	lifted_all.ident
WBGene00014695	pseudogene	lifted_all.ident
WBGene00014696	pseudogene	lifted_all.ident
WBGene00014701	pseudogene	lifted_all.ident
WBGene00014702	pseudogene	lifted_all.ident
WBGene00014703	pseudogene	lifted_all.ident
WBGene00014704	pseudogene	lifted_all.ident
WBGene00014705	pseudogene	lifted_all.ident
WBGene00014706	pseudogene	lifted_all.ident
WBGene00014707	pseudogene	lifted_all.ident
WBGene00014708	pseudogene	lifted_all.ident
WBGene00014710	pseudogene	lifted_all.ident
WBGene00014711	pseudogene	lifted_all.ident
WBGene00014714	pseudogene	lifted_all.ident
WBGene00014715	pseudogene	lifted_all.ident
WBGene00014716	pseudogene	lifted_all.ident
WBGene00014717	pseudogene	lifted_all.ident
WBGene00014718	pseudogene	lifted_all.ident
WBGene00014719	pseudogene	lifted_all.ident
WBGene00014720	pseudogene	lifted_all.ident
WBGene00014721	pseudogene	lifted_all.ident
WBGene00014722	pseudogene	lifted_all.ident
WBGene00014723	pseudogene	lifted_all.ident
WBGene00014724	pseudogene	lifted_all.ident
WBGene00014727	pseudogene	lifted_all.ident
WBGene00014728	pseudogene	lifted_all.ident
WBGene00014729	pseudogene	lifted_all.ident
WBGene00014730	pseudogene	lifted_all.ident
WBGene00014731	pseudogene	lifted_all.ident
WBGene00014732	pseudogene	lifted_all.ident
WBGene00014733	pseudogene	lifted_all.ident
WBGene00014734	pseudogene	lifted_all.ident
WBGene00014735	pseudogene	lifted_all.ident
WBGene00014738	pseudogene	lifted_all.ident
WBGene00014740	pseudogene	lifted_all.ident
WBGene00014741	pseudogene	lifted_all.ident
WBGene00014744	pseudogene	lifted_all.ident
WBGene00014745	pseudogene	lifted_all.ident
WBGene00014746	pseudogene	lifted_all.ident
WBGene00014748	pseudogene	lifted_all.ident
WBGene00014751	pseudogene	lifted_all.ident
WBGene00014752	pseudogene	lifted_all.ident
WBGene00014753	pseudogene	lifted_all.ident
WBGene00014754	pseudogene	lifted_all.ident
WBGene00014755	pseudogene	lifted_all.ident
WBGene00014757	pseudogene	lifted_all.ident
WBGene00014758	pseudogene	lifted_all.ident
WBGene00014759	pseudogene	lifted_all.ident
WBGene00014760	pseudogene	lifted_all.ident
WBGene00014763	pseudogene	lifted_all.ident
WBGene00014764	pseudogene	lifted_all.ident
WBGene00014766	pseudogene	lifted_all.ident
WBGene00014767	pseudogene	lifted_all.ident
WBGene00014768	pseudogene	lifted_all.ident
WBGene00014769	pseudogene	lifted_no.ident
WBGene00014770	pseudogene	lifted_all.ident
WBGene00014771	pseudogene	lifted_all.ident
WBGene00014772	pseudogene	lifted_all.ident
WBGene00014773	pseudogene	lifted_all.ident
WBGene00014775	pseudogene	lifted_all.ident
WBGene00014776	pseudogene	lifted_all.ident
WBGene00014777	pseudogene	lifted_all.ident
WBGene00014778	pseudogene	lifted_all.ident
WBGene00014779	pseudogene	lifted_all.ident
WBGene00014781	pseudogene	lifted_all.ident
WBGene00014782	pseudogene	lifted_all.ident
WBGene00014783	pseudogene	lifted_all.ident
WBGene00014784	pseudogene	lifted_all.ident
WBGene00014785	pseudogene	lifted_all.ident
WBGene00014786	pseudogene	lifted_all.ident
WBGene00014787	pseudogene	lifted_all.ident
WBGene00014788	pseudogene	lifted_all.ident
WBGene00014789	pseudogene	lifted_all.ident
WBGene00014790	pseudogene	lifted_all.ident
WBGene00014794	pseudogene	lifted_all.ident
WBGene00014796	pseudogene	lifted_all.ident
WBGene00014798	pseudogene	lifted_all.ident
WBGene00014799	pseudogene	lifted_all.ident
WBGene00014800	pseudogene	lifted_all.ident
WBGene00014803	pseudogene	lifted_all.ident
WBGene00014805	pseudogene	lifted_all.ident
WBGene00014806	pseudogene	lifted_all.ident
WBGene00014809	pseudogene	lifted_all.ident
WBGene00014811	pseudogene	lifted_all.ident
WBGene00014814	pseudogene	lifted_all.ident
WBGene00014817	pseudogene	lifted_all.ident
WBGene00014818	pseudogene	lifted_all.ident
WBGene00014819	pseudogene	lifted_all.ident
WBGene00014820	pseudogene	lifted_all.ident
WBGene00014821	pseudogene	lifted_all.ident
WBGene00014822	pseudogene	lifted_all.ident
WBGene00014824	pseudogene	lifted_all.ident
WBGene00014825	pseudogene	lifted_all.ident
WBGene00014827	pseudogene	lifted_all.ident
WBGene00014828	pseudogene	lifted_all.ident
WBGene00014829	pseudogene	lifted_all.ident
WBGene00014832	pseudogene	lifted_all.ident
WBGene00014833	pseudogene	lifted_all.ident
WBGene00014834	pseudogene	lifted_all.ident
WBGene00014835	pseudogene	lifted_all.ident
WBGene00014837	pseudogene	lifted_all.ident
WBGene00014838	pseudogene	lifted_all.ident
WBGene00014839	pseudogene	lifted_all.ident
WBGene00014841	pseudogene	lifted_all.ident
WBGene00014842	pseudogene	lifted_all.ident
WBGene00014843	pseudogene	lifted_all.ident
WBGene00014844	pseudogene	lifted_all.ident
WBGene00014845	pseudogene	lifted_all.ident
WBGene00014846	pseudogene	lifted_all.ident
WBGene00014849	pseudogene	lifted_all.ident
WBGene00014850	pseudogene	lifted_all.ident
WBGene00014851	pseudogene	lifted_all.ident
WBGene00014852	pseudogene	lifted_all.ident
WBGene00014853	pseudogene	lifted_all.ident
WBGene00014854	pseudogene	lifted_all.ident
WBGene00014855	pseudogene	lifted_all.ident
WBGene00014856	pseudogene	lifted_all.ident
WBGene00014857	pseudogene	lifted_all.ident
WBGene00014858	pseudogene	lifted_all.ident
WBGene00014861	pseudogene	lifted_all.ident
WBGene00014862	pseudogene	lifted_all.ident
WBGene00014863	pseudogene	lifted_all.ident
WBGene00014865	pseudogene	lifted_all.ident
WBGene00014866	pseudogene	lifted_all.ident
WBGene00014867	pseudogene	lifted_all.ident
WBGene00014868	pseudogene	lifted_all.ident
WBGene00014869	pseudogene	lifted_all.ident
WBGene00014870	pseudogene	lifted_all.ident
WBGene00014872	pseudogene	lifted_all.ident
WBGene00014873	pseudogene	lifted_all.ident
WBGene00014874	pseudogene	lifted_all.ident
WBGene00014875	pseudogene	lifted_all.ident
WBGene00014876	pseudogene	lifted_all.ident
WBGene00014877	pseudogene	lifted_all.ident
WBGene00014878	pseudogene	lifted_all.ident
WBGene00014879	pseudogene	lifted_all.ident
WBGene00014880	pseudogene	lifted_all.ident
WBGene00014881	pseudogene	lifted_all.ident
WBGene00014882	pseudogene	lifted_all.ident
WBGene00014883	pseudogene	lifted_all.ident
WBGene00014884	pseudogene	lifted_all.ident
WBGene00014885	pseudogene	lifted_all.ident
WBGene00014886	pseudogene	lifted_all.ident
WBGene00014887	pseudogene	lifted_all.ident
WBGene00014888	pseudogene	lifted_all.ident
WBGene00014889	pseudogene	lifted_all.ident
WBGene00014890	pseudogene	lifted_all.ident
WBGene00014891	pseudogene	lifted_all.ident
WBGene00014892	pseudogene	lifted_all.ident
WBGene00014893	pseudogene	lifted_all.ident
WBGene00014894	pseudogene	lifted_all.ident
WBGene00014895	pseudogene	lifted_all.ident
WBGene00014896	pseudogene	lifted_all.ident
WBGene00014897	pseudogene	lifted_all.ident
WBGene00014898	pseudogene	lifted_all.ident
WBGene00014902	pseudogene	lifted_all.ident
WBGene00014903	pseudogene	lifted_all.ident
WBGene00014904	pseudogene	lifted_all.ident
WBGene00014905	pseudogene	lifted_all.ident
WBGene00014906	pseudogene	lifted_all.ident
WBGene00014907	pseudogene	lifted_all.ident
WBGene00014908	pseudogene	lifted_all.ident
WBGene00014909	pseudogene	lifted_all.ident
WBGene00014910	pseudogene	lifted_all.ident
WBGene00014911	pseudogene	lifted_all.ident
WBGene00014912	pseudogene	lifted_all.ident
WBGene00014915	pseudogene	lifted_all.ident
WBGene00014916	pseudogene	lifted_all.ident
WBGene00014917	pseudogene	lifted_all.ident
WBGene00014918	pseudogene	lifted_all.ident
WBGene00014920	pseudogene	lifted_all.ident
WBGene00014921	pseudogene	lifted_all.ident
WBGene00014922	pseudogene	lifted_all.ident
WBGene00014923	pseudogene	lifted_all.ident
WBGene00014925	pseudogene	lifted_all.ident
WBGene00014927	pseudogene	lifted_no.ident
WBGene00014928	pseudogene	lifted_all.ident
WBGene00014929	pseudogene	lifted_all.ident
WBGene00014930	pseudogene	lifted_all.ident
WBGene00014931	pseudogene	lifted_all.ident
WBGene00014932	pseudogene	lifted_all.ident
WBGene00014933	pseudogene	lifted_all.ident
WBGene00014934	pseudogene	lifted_all.ident
WBGene00014935	pseudogene	lifted_all.ident
WBGene00014936	pseudogene	lifted_all.ident
WBGene00014937	pseudogene	lifted_all.ident
WBGene00014939	pseudogene	lifted_all.ident
WBGene00014941	pseudogene	lifted_all.ident
WBGene00014943	pseudogene	lifted_all.ident
WBGene00014944	pseudogene	lifted_all.ident
WBGene00014945	pseudogene	lifted_all.ident
WBGene00014946	pseudogene	lifted_all.ident
WBGene00014947	pseudogene	lifted_all.ident
WBGene00014948	pseudogene	lifted_all.ident
WBGene00014949	pseudogene	lifted_all.ident
WBGene00014950	pseudogene	lifted_all.ident
WBGene00014951	pseudogene	lifted_all.ident
WBGene00014952	pseudogene	lifted_all.ident
WBGene00014954	pseudogene	lifted_all.ident
WBGene00014955	pseudogene	lifted_all.ident
WBGene00014956	pseudogene	no.lift
WBGene00014957	pseudogene	lifted_all.ident
WBGene00014958	pseudogene	lifted_all.ident
WBGene00014961	pseudogene	lifted_all.ident
WBGene00014962	pseudogene	lifted_all.ident
WBGene00014963	pseudogene	lifted_all.ident
WBGene00014964	pseudogene	lifted_all.ident
WBGene00014966	pseudogene	lifted_all.ident
WBGene00014967	pseudogene	lifted_all.ident
WBGene00014969	pseudogene	lifted_all.ident
WBGene00014970	pseudogene	lifted_all.ident
WBGene00014971	pseudogene	lifted_all.ident
WBGene00014972	pseudogene	lifted_all.ident
WBGene00014973	pseudogene	lifted_all.ident
WBGene00014974	pseudogene	lifted_all.ident
WBGene00014975	pseudogene	lifted_all.ident
WBGene00014976	pseudogene	lifted_all.ident
WBGene00014977	pseudogene	lifted_all.ident
WBGene00014978	pseudogene	lifted_all.ident
WBGene00014979	pseudogene	lifted_all.ident
WBGene00014980	pseudogene	lifted_all.ident
WBGene00014981	pseudogene	lifted_all.ident
WBGene00014983	pseudogene	lifted_all.ident
WBGene00014984	pseudogene	lifted_all.ident
WBGene00014987	pseudogene	lifted_all.ident
WBGene00014990	pseudogene	lifted_all.ident
WBGene00014991	pseudogene	lifted_all.ident
WBGene00014992	pseudogene	lifted_all.ident
WBGene00014993	pseudogene	lifted_all.ident
WBGene00014994	pseudogene	lifted_all.ident
WBGene00014996	pseudogene	lifted_all.ident
WBGene00015013	pseudogene	lifted_all.ident
WBGene00015016	pseudogene	lifted_all.ident
WBGene00015077	pseudogene	lifted_all.ident
WBGene00015078	pseudogene	lifted_all.ident
WBGene00015269	pseudogene	lifted_bad.coding
WBGene00015359	pseudogene	lifted_all.ident
WBGene00015432	pseudogene	lifted_all.ident
WBGene00015436	pseudogene	lifted_all.ident
WBGene00015439	pseudogene	lifted_all.ident
WBGene00015440	pseudogene	lifted_all.ident
WBGene00015441	pseudogene	lifted_all.ident
WBGene00015533	pseudogene	lifted_all.ident
WBGene00015550	pseudogene	lifted_all.ident
WBGene00015562	pseudogene	lifted_all.ident
WBGene00015575	pseudogene	lifted_all.ident
WBGene00015594	pseudogene	lifted_all.ident
WBGene00015596	pseudogene	lifted_all.ident
WBGene00015597	pseudogene	lifted_all.ident
WBGene00015603	pseudogene	lifted_all.ident
WBGene00015614	pseudogene	lifted_all.ident
WBGene00015616	pseudogene	lifted_all.ident
WBGene00015640	pseudogene	lifted_all.ident
WBGene00015654	pseudogene	lifted_all.ident
WBGene00015719	pseudogene	lifted_all.ident
WBGene00015727	pseudogene	lifted_all.ident
WBGene00015761	pseudogene	lifted_all.ident
WBGene00015763	pseudogene	lifted_all.ident
WBGene00015771	pseudogene	lifted_all.ident
WBGene00015826	pseudogene	lifted_all.ident
WBGene00015840	pseudogene	lifted_all.ident
WBGene00015862	pseudogene	lifted_all.ident
WBGene00015874	pseudogene	lifted_all.ident
WBGene00015876	pseudogene	lifted_all.ident
WBGene00015989	pseudogene	lifted_all.ident
WBGene00015990	pseudogene	lifted_all.ident
WBGene00015991	pseudogene	lifted_all.ident
WBGene00016047	pseudogene	lifted_all.ident
WBGene00016076	pseudogene	lifted_all.ident
WBGene00016078	pseudogene	lifted_all.ident
WBGene00016080	pseudogene	lifted_all.ident
WBGene00016211	pseudogene	lifted_no.ident
WBGene00016224	pseudogene	lifted_all.ident
WBGene00016225	pseudogene	lifted_all.ident
WBGene00016230	pseudogene	lifted_all.ident
WBGene00016255	pseudogene	lifted_all.ident
WBGene00016280	pseudogene	lifted_all.ident
WBGene00016296	pseudogene	lifted_all.ident
WBGene00016301	pseudogene	lifted_all.ident
WBGene00016304	pseudogene	lifted_all.ident
WBGene00016305	pseudogene	lifted_all.ident
WBGene00016338	pseudogene	lifted_all.ident
WBGene00016470	pseudogene	lifted_all.ident
WBGene00016478	pseudogene	lifted_all.ident
WBGene00016497	pseudogene	lifted_all.ident
WBGene00016516	pseudogene	lifted_all.ident
WBGene00016526	pseudogene	lifted_all.ident
WBGene00016666	pseudogene	lifted_all.ident
WBGene00016688	pseudogene	lifted_all.ident
WBGene00016713	pseudogene	lifted_all.ident
WBGene00016737	pseudogene	lifted_all.ident
WBGene00016851	pseudogene	lifted_all.ident
WBGene00016853	pseudogene	lifted_all.ident
WBGene00016854	pseudogene	lifted_all.ident
WBGene00016861	pseudogene	lifted_all.ident
WBGene00016959	pseudogene	lifted_all.ident
WBGene00017035	pseudogene	lifted_all.ident
WBGene00017115	pseudogene	lifted_all.ident
WBGene00017117	pseudogene	lifted_all.ident
WBGene00017118	pseudogene	lifted_all.ident
WBGene00017152	pseudogene	lifted_all.ident
WBGene00017202	pseudogene	lifted_all.ident
WBGene00017232	pseudogene	lifted_all.ident
WBGene00017235	pseudogene	lifted_all.ident
WBGene00017345	pseudogene	lifted_all.ident
WBGene00017370	pseudogene	lifted_all.ident
WBGene00017391	pseudogene	lifted_all.ident
WBGene00017392	pseudogene	lifted_all.ident
WBGene00017404	pseudogene	lifted_all.ident
WBGene00017415	pseudogene	lifted_all.ident
WBGene00017432	pseudogene	lifted_all.ident
WBGene00017494	pseudogene	lifted_all.ident
WBGene00017496	pseudogene	lifted_no.ident
WBGene00017505	pseudogene	lifted_all.ident
WBGene00017529	pseudogene	lifted_all.ident
WBGene00017533	pseudogene	lifted_all.ident
WBGene00017602	pseudogene	lifted_all.ident
WBGene00017677	pseudogene	lifted_all.ident
WBGene00017680	pseudogene	lifted_all.ident
WBGene00017701	pseudogene	lifted_all.ident
WBGene00017729	pseudogene	lifted_all.ident
WBGene00017731	pseudogene	lifted_all.ident
WBGene00017739	pseudogene	lifted_all.ident
WBGene00017821	pseudogene	lifted_all.ident
WBGene00017849	pseudogene	lifted_all.ident
WBGene00017870	pseudogene	lifted_all.ident
WBGene00017877	pseudogene	lifted_all.ident
WBGene00017878	pseudogene	lifted_all.ident
WBGene00017917	pseudogene	lifted_all.ident
WBGene00017933	pseudogene	lifted_all.ident
WBGene00017956	pseudogene	lifted_no.ident
WBGene00018054	pseudogene	lifted_all.ident
WBGene00018059	pseudogene	lifted_all.ident
WBGene00018066	pseudogene	lifted_all.ident
WBGene00018109	pseudogene	lifted_all.ident
WBGene00018125	pseudogene	lifted_all.ident
WBGene00018127	pseudogene	lifted_all.ident
WBGene00018194	pseudogene	lifted_all.ident
WBGene00018199	pseudogene	lifted_all.ident
WBGene00018224	pseudogene	lifted_all.ident
WBGene00018225	pseudogene	lifted_all.ident
WBGene00018325	pseudogene	lifted_all.ident
WBGene00018326	pseudogene	lifted_all.ident
WBGene00018329	pseudogene	lifted_all.ident
WBGene00018382	pseudogene	lifted_all.ident
WBGene00018448	pseudogene	lifted_all.ident
WBGene00018449	pseudogene	lifted_all.ident
WBGene00018450	pseudogene	lifted_all.ident
WBGene00018451	pseudogene	lifted_all.ident
WBGene00018454	pseudogene	lifted_all.ident
WBGene00018494	pseudogene	lifted_all.ident
WBGene00018495	pseudogene	lifted_all.ident
WBGene00018503	pseudogene	lifted_all.ident
WBGene00018540	pseudogene	lifted_all.ident
WBGene00018553	pseudogene	lifted_all.ident
WBGene00018577	pseudogene	lifted_all.ident
WBGene00018644	pseudogene	lifted_all.ident
WBGene00018648	pseudogene	lifted_all.ident
WBGene00018658	pseudogene	lifted_all.ident
WBGene00018662	pseudogene	lifted_all.ident
WBGene00018664	pseudogene	lifted_all.ident
WBGene00018666	pseudogene	lifted_all.ident
WBGene00018699	pseudogene	lifted_all.ident
WBGene00018749	pseudogene	lifted_all.ident
WBGene00018759	pseudogene	lifted_all.ident
WBGene00018807	pseudogene	lifted_all.ident
WBGene00018852	pseudogene	lifted_all.ident
WBGene00018856	pseudogene	lifted_all.ident
WBGene00018862	pseudogene	lifted_all.ident
WBGene00018914	pseudogene	lifted_bad.coding
WBGene00018919	pseudogene	lifted_all.ident
WBGene00018929	pseudogene	lifted_all.ident
WBGene00018992	pseudogene	lifted_all.ident
WBGene00018993	pseudogene	lifted_all.ident
WBGene00019050	pseudogene	lifted_all.ident
WBGene00019095	pseudogene	lifted_all.ident
WBGene00019107	pseudogene	lifted_all.ident
WBGene00019114	pseudogene	lifted_all.ident
WBGene00019117	pseudogene	lifted_all.ident
WBGene00019131	pseudogene	lifted_all.ident
WBGene00019133	pseudogene	lifted_all.ident
WBGene00019134	pseudogene	lifted_all.ident
WBGene00019135	pseudogene	lifted_all.ident
WBGene00019137	pseudogene	lifted_all.ident
WBGene00019176	pseudogene	lifted_all.ident
WBGene00019181	pseudogene	lifted_all.ident
WBGene00019208	pseudogene	lifted_all.ident
WBGene00019278	pseudogene	lifted_all.ident
WBGene00019310	pseudogene	lifted_all.ident
WBGene00019311	pseudogene	lifted_all.ident
WBGene00019374	pseudogene	lifted_all.ident
WBGene00019379	pseudogene	lifted_all.ident
WBGene00019384	pseudogene	lifted_all.ident
WBGene00019385	pseudogene	lifted_all.ident
WBGene00019390	pseudogene	lifted_all.ident
WBGene00019439	pseudogene	lifted_all.ident
WBGene00019441	pseudogene	lifted_all.ident
WBGene00019454	pseudogene	lifted_all.ident
WBGene00019469	pseudogene	lifted_all.ident
WBGene00019494	pseudogene	lifted_all.ident
WBGene00019517	pseudogene	lifted_all.ident
WBGene00019526	pseudogene	lifted_all.ident
WBGene00019529	pseudogene	lifted_all.ident
WBGene00019532	pseudogene	lifted_all.ident
WBGene00019560	pseudogene	lifted_all.ident
WBGene00019568	pseudogene	lifted_all.ident
WBGene00019569	pseudogene	lifted_all.ident
WBGene00019575	pseudogene	lifted_all.ident
WBGene00019672	pseudogene	lifted_all.ident
WBGene00019676	pseudogene	lifted_all.ident
WBGene00019706	pseudogene	lifted_all.ident
WBGene00019739	pseudogene	lifted_all.ident
WBGene00019789	pseudogene	lifted_all.ident
WBGene00019853	pseudogene	lifted_all.ident
WBGene00019912	pseudogene	lifted_all.ident
WBGene00019930	pseudogene	lifted_all.ident
WBGene00019932	pseudogene	lifted_all.ident
WBGene00019934	pseudogene	lifted_all.ident
WBGene00019969	pseudogene	lifted_all.ident
WBGene00019976	pseudogene	lifted_all.ident
WBGene00020013	pseudogene	lifted_all.ident
WBGene00020028	pseudogene	lifted_all.ident
WBGene00020059	pseudogene	lifted_all.ident
WBGene00020065	pseudogene	lifted_all.ident
WBGene00020075	pseudogene	lifted_all.ident
WBGene00020081	pseudogene	lifted_all.ident
WBGene00020087	pseudogene	lifted_all.ident
WBGene00020145	pseudogene	lifted_all.ident
WBGene00020164	pseudogene	lifted_all.ident
WBGene00020167	pseudogene	lifted_all.ident
WBGene00020204	pseudogene	lifted_all.ident
WBGene00020238	pseudogene	lifted_all.ident
WBGene00020271	pseudogene	lifted_all.ident
WBGene00020295	pseudogene	lifted_all.ident
WBGene00020304	pseudogene	lifted_all.ident
WBGene00020306	pseudogene	lifted_all.ident
WBGene00020308	pseudogene	lifted_all.ident
WBGene00020309	pseudogene	lifted_all.ident
WBGene00020338	pseudogene	lifted_all.ident
WBGene00020352	pseudogene	lifted_all.ident
WBGene00020371	pseudogene	lifted_all.ident
WBGene00020388	pseudogene	lifted_all.ident
WBGene00020434	pseudogene	lifted_all.ident
WBGene00020458	pseudogene	lifted_all.ident
WBGene00020522	pseudogene	lifted_all.ident
WBGene00020545	pseudogene	lifted_all.ident
WBGene00020547	pseudogene	lifted_all.ident
WBGene00020591	pseudogene	lifted_all.ident
WBGene00020614	pseudogene	lifted_all.ident
WBGene00020615	pseudogene	lifted_all.ident
WBGene00020619	pseudogene	lifted_all.ident
WBGene00020622	pseudogene	lifted_all.ident
WBGene00020632	pseudogene	lifted_all.ident
WBGene00020641	pseudogene	lifted_all.ident
WBGene00020711	pseudogene	lifted_all.ident
WBGene00020729	pseudogene	lifted_all.ident
WBGene00020739	pseudogene	lifted_all.ident
WBGene00020751	pseudogene	lifted_all.ident
WBGene00020872	pseudogene	lifted_all.ident
WBGene00020873	pseudogene	lifted_all.ident
WBGene00020885	pseudogene	lifted_all.ident
WBGene00020892	pseudogene	lifted_all.ident
WBGene00020971	pseudogene	lifted_all.ident
WBGene00020981	pseudogene	lifted_all.ident
WBGene00020991	pseudogene	lifted_all.ident
WBGene00020992	pseudogene	lifted_all.ident
WBGene00021001	pseudogene	lifted_all.ident
WBGene00021018	pseudogene	lifted_all.ident
WBGene00021037	pseudogene	lifted_all.ident
WBGene00021067	pseudogene	lifted_all.ident
WBGene00021130	pseudogene	lifted_all.ident
WBGene00021140	pseudogene	lifted_all.ident
WBGene00021151	pseudogene	lifted_all.ident
WBGene00021181	pseudogene	lifted_all.ident
WBGene00021182	pseudogene	lifted_all.ident
WBGene00021184	pseudogene	lifted_all.ident
WBGene00021218	pseudogene	lifted_all.ident
WBGene00021225	pseudogene	no.lift
WBGene00021230	pseudogene	lifted_all.ident
WBGene00021233	pseudogene	lifted_all.ident
WBGene00021234	pseudogene	lifted_all.ident
WBGene00021265	pseudogene	lifted_all.ident
WBGene00021273	pseudogene	lifted_all.ident
WBGene00021278	pseudogene	lifted_all.ident
WBGene00021342	pseudogene	lifted_all.ident
WBGene00021360	pseudogene	lifted_all.ident
WBGene00021380	pseudogene	lifted_all.ident
WBGene00021418	pseudogene	lifted_all.ident
WBGene00021453	pseudogene	lifted_all.ident
WBGene00021483	pseudogene	lifted_no.ident
WBGene00021489	pseudogene	lifted_all.ident
WBGene00021520	pseudogene	lifted_all.ident
WBGene00021574	pseudogene	lifted_all.ident
WBGene00021604	pseudogene	lifted_all.ident
WBGene00021606	pseudogene	lifted_all.ident
WBGene00021622	pseudogene	lifted_all.ident
WBGene00021651	pseudogene	lifted_all.ident
WBGene00021664	pseudogene	lifted_no.ident
WBGene00021668	pseudogene	lifted_all.ident
WBGene00021673	pseudogene	lifted_all.ident
WBGene00021723	pseudogene	lifted_all.ident
WBGene00021737	pseudogene	lifted_all.ident
WBGene00021746	pseudogene	lifted_all.ident
WBGene00021747	pseudogene	lifted_all.ident
WBGene00021792	pseudogene	lifted_all.ident
WBGene00021819	pseudogene	lifted_all.ident
WBGene00021885	pseudogene	lifted_all.ident
WBGene00021886	pseudogene	lifted_all.ident
WBGene00021889	pseudogene	lifted_all.ident
WBGene00021971	pseudogene	lifted_all.ident
WBGene00021995	pseudogene	lifted_all.ident
WBGene00022001	pseudogene	lifted_all.ident
WBGene00022017	pseudogene	lifted_all.ident
WBGene00022023	pseudogene	lifted_all.ident
WBGene00022079	pseudogene	lifted_all.ident
WBGene00022082	pseudogene	lifted_all.ident
WBGene00022085	pseudogene	lifted_all.ident
WBGene00022163	pseudogene	lifted_all.ident
WBGene00022204	pseudogene	lifted_all.ident
WBGene00022205	pseudogene	lifted_no.ident
WBGene00022211	pseudogene	lifted_all.ident
WBGene00022214	pseudogene	lifted_all.ident
WBGene00022222	pseudogene	lifted_all.ident
WBGene00022227	pseudogene	lifted_all.ident
WBGene00022229	pseudogene	lifted_all.ident
WBGene00022249	pseudogene	lifted_all.ident
WBGene00022272	pseudogene	lifted_all.ident
WBGene00022370	pseudogene	lifted_all.ident
WBGene00022407	pseudogene	lifted_all.ident
WBGene00022432	pseudogene	lifted_all.ident
WBGene00022521	pseudogene	lifted_all.ident
WBGene00022526	pseudogene	lifted_all.ident
WBGene00022545	pseudogene	lifted_all.ident
WBGene00022587	pseudogene	lifted_all.ident
WBGene00022622	pseudogene	lifted_all.ident
WBGene00022630	pseudogene	lifted_no.ident
WBGene00022636	pseudogene	lifted_all.ident
WBGene00022658	pseudogene	lifted_all.ident
WBGene00022688	pseudogene	lifted_all.ident
WBGene00022693	pseudogene	lifted_all.ident
WBGene00022755	pseudogene	lifted_all.ident
WBGene00022760	pseudogene	lifted_all.ident
WBGene00022763	pseudogene	lifted_all.ident
WBGene00022806	pseudogene	lifted_all.ident
WBGene00022818	pseudogene	lifted_all.ident
WBGene00022840	pseudogene	lifted_all.ident
WBGene00022846	pseudogene	lifted_all.ident
WBGene00023030	pseudogene	lifted_all.ident
WBGene00023036	pseudogene	lifted_all.ident
WBGene00023039	pseudogene	lifted_all.ident
WBGene00023163	pseudogene	lifted_all.ident
WBGene00023191	pseudogene	lifted_all.ident
WBGene00023209	pseudogene	lifted_all.ident
WBGene00023223	pseudogene	lifted_all.ident
WBGene00023224	pseudogene	lifted_all.ident
WBGene00023225	pseudogene	lifted_all.ident
WBGene00023226	pseudogene	lifted_all.ident
WBGene00023227	pseudogene	lifted_all.ident
WBGene00023228	pseudogene	lifted_all.ident
WBGene00023229	pseudogene	lifted_all.ident
WBGene00023230	pseudogene	lifted_all.ident
WBGene00023231	pseudogene	lifted_all.ident
WBGene00023232	pseudogene	lifted_all.ident
WBGene00023233	pseudogene	lifted_all.ident
WBGene00023234	pseudogene	lifted_all.ident
WBGene00023235	pseudogene	lifted_all.ident
WBGene00023236	pseudogene	lifted_all.ident
WBGene00023237	pseudogene	lifted_all.ident
WBGene00023238	pseudogene	lifted_all.ident
WBGene00023239	pseudogene	lifted_all.ident
WBGene00023240	pseudogene	lifted_all.ident
WBGene00023241	pseudogene	lifted_all.ident
WBGene00023242	pseudogene	lifted_all.ident
WBGene00023243	pseudogene	lifted_no.ident
WBGene00023244	pseudogene	lifted_all.ident
WBGene00023245	pseudogene	lifted_all.ident
WBGene00023246	pseudogene	lifted_all.ident
WBGene00023247	pseudogene	lifted_all.ident
WBGene00023248	pseudogene	lifted_all.ident
WBGene00023249	pseudogene	lifted_all.ident
WBGene00023250	pseudogene	lifted_all.ident
WBGene00023251	pseudogene	lifted_all.ident
WBGene00023252	pseudogene	lifted_all.ident
WBGene00023253	pseudogene	lifted_all.ident
WBGene00023254	pseudogene	lifted_all.ident
WBGene00023255	pseudogene	lifted_all.ident
WBGene00023256	pseudogene	lifted_all.ident
WBGene00023257	pseudogene	lifted_all.ident
WBGene00023259	pseudogene	lifted_all.ident
WBGene00023260	pseudogene	lifted_all.ident
WBGene00023262	pseudogene	lifted_all.ident
WBGene00023263	pseudogene	lifted_all.ident
WBGene00023264	pseudogene	lifted_all.ident
WBGene00023265	pseudogene	lifted_all.ident
WBGene00023266	pseudogene	lifted_all.ident
WBGene00023267	pseudogene	lifted_all.ident
WBGene00023268	pseudogene	lifted_all.ident
WBGene00023269	pseudogene	lifted_all.ident
WBGene00023270	pseudogene	lifted_all.ident
WBGene00023271	pseudogene	lifted_all.ident
WBGene00023272	pseudogene	lifted_all.ident
WBGene00023273	pseudogene	lifted_all.ident
WBGene00023274	pseudogene	lifted_all.ident
WBGene00023275	pseudogene	lifted_all.ident
WBGene00023276	pseudogene	lifted_all.ident
WBGene00023277	pseudogene	lifted_all.ident
WBGene00023278	pseudogene	lifted_all.ident
WBGene00023279	pseudogene	lifted_all.ident
WBGene00023281	pseudogene	lifted_all.ident
WBGene00023282	pseudogene	lifted_all.ident
WBGene00023283	pseudogene	lifted_all.ident
WBGene00023285	pseudogene	lifted_all.ident
WBGene00023287	pseudogene	lifted_all.ident
WBGene00023288	pseudogene	lifted_all.ident
WBGene00023289	pseudogene	lifted_no.ident
WBGene00023290	pseudogene	lifted_all.ident
WBGene00023291	pseudogene	lifted_all.ident
WBGene00023293	pseudogene	lifted_all.ident
WBGene00023294	pseudogene	lifted_all.ident
WBGene00023295	pseudogene	lifted_all.ident
WBGene00023296	pseudogene	lifted_all.ident
WBGene00023297	pseudogene	lifted_all.ident
WBGene00023298	pseudogene	lifted_all.ident
WBGene00023299	pseudogene	lifted_all.ident
WBGene00023300	pseudogene	lifted_all.ident
WBGene00023301	pseudogene	lifted_all.ident
WBGene00023302	pseudogene	lifted_all.ident
WBGene00023303	pseudogene	lifted_all.ident
WBGene00023304	pseudogene	lifted_all.ident
WBGene00023305	pseudogene	lifted_all.ident
WBGene00023306	pseudogene	lifted_all.ident
WBGene00023307	pseudogene	lifted_all.ident
WBGene00023308	pseudogene	lifted_all.ident
WBGene00023309	pseudogene	lifted_all.ident
WBGene00023310	pseudogene	lifted_all.ident
WBGene00023311	pseudogene	lifted_all.ident
WBGene00023312	pseudogene	lifted_all.ident
WBGene00023313	pseudogene	lifted_all.ident
WBGene00023314	pseudogene	lifted_all.ident
WBGene00023315	pseudogene	lifted_all.ident
WBGene00023316	pseudogene	lifted_all.ident
WBGene00023317	pseudogene	lifted_all.ident
WBGene00023318	pseudogene	lifted_all.ident
WBGene00023319	pseudogene	lifted_all.ident
WBGene00023320	pseudogene	lifted_all.ident
WBGene00023321	pseudogene	lifted_all.ident
WBGene00023322	pseudogene	lifted_all.ident
WBGene00023323	pseudogene	lifted_all.ident
WBGene00023324	pseudogene	lifted_all.ident
WBGene00023325	pseudogene	lifted_all.ident
WBGene00023326	pseudogene	lifted_all.ident
WBGene00023327	pseudogene	lifted_all.ident
WBGene00023328	pseudogene	lifted_all.ident
WBGene00023329	pseudogene	lifted_all.ident
WBGene00023330	pseudogene	lifted_all.ident
WBGene00023331	pseudogene	lifted_all.ident
WBGene00023332	pseudogene	lifted_all.ident
WBGene00023333	pseudogene	lifted_all.ident
WBGene00023334	pseudogene	lifted_all.ident
WBGene00023335	pseudogene	lifted_all.ident
WBGene00023336	pseudogene	lifted_all.ident
WBGene00023337	pseudogene	lifted_all.ident
WBGene00023338	pseudogene	lifted_all.ident
WBGene00023339	pseudogene	lifted_all.ident
WBGene00023340	pseudogene	lifted_all.ident
WBGene00023341	pseudogene	lifted_all.ident
WBGene00023342	pseudogene	lifted_all.ident
WBGene00023343	pseudogene	lifted_all.ident
WBGene00023344	pseudogene	lifted_all.ident
WBGene00023345	pseudogene	lifted_all.ident
WBGene00023346	pseudogene	lifted_all.ident
WBGene00023348	pseudogene	lifted_all.ident
WBGene00023349	pseudogene	lifted_all.ident
WBGene00023351	pseudogene	lifted_all.ident
WBGene00023352	pseudogene	lifted_all.ident
WBGene00023353	pseudogene	lifted_all.ident
WBGene00023354	pseudogene	lifted_all.ident
WBGene00023355	pseudogene	lifted_all.ident
WBGene00023356	pseudogene	lifted_all.ident
WBGene00023357	pseudogene	lifted_all.ident
WBGene00023358	pseudogene	lifted_all.ident
WBGene00023359	pseudogene	lifted_all.ident
WBGene00023360	pseudogene	lifted_all.ident
WBGene00023361	pseudogene	lifted_all.ident
WBGene00023362	pseudogene	lifted_all.ident
WBGene00023363	pseudogene	lifted_all.ident
WBGene00023364	pseudogene	lifted_all.ident
WBGene00023365	pseudogene	lifted_all.ident
WBGene00023366	pseudogene	lifted_all.ident
WBGene00023367	pseudogene	lifted_all.ident
WBGene00023368	pseudogene	lifted_all.ident
WBGene00023369	pseudogene	lifted_all.ident
WBGene00023370	pseudogene	lifted_all.ident
WBGene00023371	pseudogene	lifted_all.ident
WBGene00023372	pseudogene	lifted_all.ident
WBGene00023373	pseudogene	lifted_all.ident
WBGene00023375	pseudogene	lifted_all.ident
WBGene00023376	pseudogene	lifted_all.ident
WBGene00023377	pseudogene	lifted_all.ident
WBGene00023378	pseudogene	lifted_all.ident
WBGene00023379	pseudogene	lifted_all.ident
WBGene00023380	pseudogene	lifted_all.ident
WBGene00023381	pseudogene	lifted_all.ident
WBGene00023382	pseudogene	lifted_all.ident
WBGene00023383	pseudogene	lifted_all.ident
WBGene00023384	pseudogene	lifted_all.ident
WBGene00023385	pseudogene	lifted_all.ident
WBGene00023386	pseudogene	lifted_all.ident
WBGene00023387	pseudogene	lifted_all.ident
WBGene00023388	pseudogene	lifted_all.ident
WBGene00023389	pseudogene	lifted_all.ident
WBGene00023390	pseudogene	lifted_all.ident
WBGene00023391	pseudogene	lifted_all.ident
WBGene00023392	pseudogene	lifted_all.ident
WBGene00023393	pseudogene	lifted_all.ident
WBGene00023394	pseudogene	lifted_all.ident
WBGene00023395	pseudogene	lifted_all.ident
WBGene00023396	pseudogene	lifted_all.ident
WBGene00023397	pseudogene	lifted_all.ident
WBGene00023398	pseudogene	lifted_all.ident
WBGene00023399	pseudogene	lifted_all.ident
WBGene00023400	pseudogene	lifted_all.ident
WBGene00023401	pseudogene	lifted_all.ident
WBGene00023402	pseudogene	lifted_all.ident
WBGene00023464	pseudogene	lifted_all.ident
WBGene00023465	pseudogene	lifted_all.ident
WBGene00023470	pseudogene	lifted_all.ident
WBGene00023471	pseudogene	lifted_all.ident
WBGene00023476	pseudogene	lifted_all.ident
WBGene00023480	pseudogene	lifted_all.ident
WBGene00023481	pseudogene	lifted_all.ident
WBGene00023482	pseudogene	lifted_all.ident
WBGene00023488	pseudogene	lifted_all.ident
WBGene00023507	pseudogene	lifted_all.ident
WBGene00023509	pseudogene	lifted_all.ident
WBGene00023510	pseudogene	lifted_all.ident
WBGene00023511	pseudogene	lifted_all.ident
WBGene00023512	pseudogene	lifted_all.ident
WBGene00023516	pseudogene	lifted_all.ident
WBGene00023518	pseudogene	lifted_all.ident
WBGene00043053	pseudogene	lifted_all.ident
WBGene00043055	pseudogene	lifted_all.ident
WBGene00043239	pseudogene	lifted_all.ident
WBGene00043283	pseudogene	lifted_all.ident
WBGene00043987	pseudogene	lifted_all.ident
WBGene00043993	pseudogene	lifted_all.ident
WBGene00044000	pseudogene	lifted_all.ident
WBGene00044015	pseudogene	lifted_all.ident
WBGene00044022	pseudogene	lifted_all.ident
WBGene00044036	pseudogene	lifted_all.ident
WBGene00044037	pseudogene	lifted_all.ident
WBGene00044038	pseudogene	lifted_all.ident
WBGene00044040	pseudogene	lifted_all.ident
WBGene00044041	pseudogene	lifted_all.ident
WBGene00044042	pseudogene	lifted_all.ident
WBGene00044046	pseudogene	lifted_all.ident
WBGene00044051	pseudogene	lifted_all.ident
WBGene00044052	pseudogene	lifted_all.ident
WBGene00044053	pseudogene	lifted_all.ident
WBGene00044054	pseudogene	lifted_all.ident
WBGene00044056	pseudogene	lifted_all.ident
WBGene00044057	pseudogene	lifted_all.ident
WBGene00044085	pseudogene	lifted_all.ident
WBGene00044093	pseudogene	lifted_all.ident
WBGene00044095	pseudogene	lifted_all.ident
WBGene00044096	pseudogene	lifted_all.ident
WBGene00044097	pseudogene	lifted_all.ident
WBGene00044101	pseudogene	lifted_all.ident
WBGene00044102	pseudogene	lifted_all.ident
WBGene00044103	pseudogene	lifted_all.ident
WBGene00044104	pseudogene	lifted_no.ident
WBGene00044119	pseudogene	lifted_all.ident
WBGene00044126	pseudogene	lifted_all.ident
WBGene00044128	pseudogene	lifted_all.ident
WBGene00044129	pseudogene	lifted_all.ident
WBGene00044130	pseudogene	lifted_all.ident
WBGene00044155	pseudogene	lifted_all.ident
WBGene00044168	pseudogene	lifted_all.ident
WBGene00044170	pseudogene	lifted_all.ident
WBGene00044171	pseudogene	lifted_all.ident
WBGene00044196	pseudogene	lifted_all.ident
WBGene00044199	pseudogene	lifted_all.ident
WBGene00044209	pseudogene	lifted_all.ident
WBGene00044216	pseudogene	lifted_all.ident
WBGene00044217	pseudogene	lifted_all.ident
WBGene00044219	pseudogene	lifted_all.ident
WBGene00044220	pseudogene	lifted_all.ident
WBGene00044224	pseudogene	lifted_all.ident
WBGene00044226	pseudogene	lifted_all.ident
WBGene00044229	pseudogene	lifted_all.ident
WBGene00044262	pseudogene	lifted_all.ident
WBGene00044267	pseudogene	lifted_all.ident
WBGene00044268	pseudogene	lifted_all.ident
WBGene00044270	pseudogene	lifted_all.ident
WBGene00044276	pseudogene	lifted_all.ident
WBGene00044277	pseudogene	lifted_all.ident
WBGene00044279	pseudogene	lifted_all.ident
WBGene00044285	pseudogene	lifted_all.ident
WBGene00044308	pseudogene	lifted_all.ident
WBGene00044309	pseudogene	lifted_all.ident
WBGene00044343	pseudogene	lifted_all.ident
WBGene00044397	pseudogene	lifted_all.ident
WBGene00044398	pseudogene	lifted_all.ident
WBGene00044405	pseudogene	lifted_all.ident
WBGene00044412	pseudogene	lifted_all.ident
WBGene00044430	pseudogene	lifted_all.ident
WBGene00044486	pseudogene	lifted_all.ident
WBGene00044498	pseudogene	lifted_all.ident
WBGene00044503	pseudogene	no.lift
WBGene00044505	pseudogene	lifted_all.ident
WBGene00044515	pseudogene	lifted_all.ident
WBGene00044517	pseudogene	lifted_all.ident
WBGene00044523	pseudogene	lifted_all.ident
WBGene00044585	pseudogene	lifted_all.ident
WBGene00044606	pseudogene	lifted_all.ident
WBGene00044632	pseudogene	lifted_all.ident
WBGene00044639	pseudogene	lifted_all.ident
WBGene00044642	pseudogene	lifted_all.ident
WBGene00044653	pseudogene	lifted_all.ident
WBGene00044657	pseudogene	lifted_all.ident
WBGene00044660	pseudogene	lifted_all.ident
WBGene00044670	pseudogene	lifted_all.ident
WBGene00044691	pseudogene	lifted_all.ident
WBGene00044695	pseudogene	lifted_all.ident
WBGene00044700	pseudogene	lifted_no.ident
WBGene00044702	pseudogene	lifted_all.ident
WBGene00044703	pseudogene	lifted_all.ident
WBGene00044706	pseudogene	lifted_all.ident
WBGene00044710	pseudogene	lifted_all.ident
WBGene00044712	pseudogene	lifted_all.ident
WBGene00044713	pseudogene	lifted_all.ident
WBGene00044714	pseudogene	lifted_all.ident
WBGene00044716	pseudogene	lifted_all.ident
WBGene00044718	pseudogene	lifted_all.ident
WBGene00044722	pseudogene	lifted_all.ident
WBGene00044727	pseudogene	lifted_all.ident
WBGene00044729	pseudogene	lifted_all.ident
WBGene00044739	pseudogene	lifted_all.ident
WBGene00044752	pseudogene	lifted_all.ident
WBGene00044764	pseudogene	lifted_all.ident
WBGene00044768	pseudogene	lifted_all.ident
WBGene00044769	pseudogene	lifted_all.ident
WBGene00044781	pseudogene	lifted_all.ident
WBGene00044782	pseudogene	lifted_all.ident
WBGene00044787	pseudogene	lifted_all.ident
WBGene00044800	pseudogene	lifted_all.ident
WBGene00044804	pseudogene	lifted_all.ident
WBGene00044806	pseudogene	lifted_all.ident
WBGene00044808	pseudogene	lifted_all.ident
WBGene00044809	pseudogene	lifted_no.ident
WBGene00044902	pseudogene	lifted_all.ident
WBGene00044905	pseudogene	lifted_all.ident
WBGene00044907	pseudogene	lifted_all.ident
WBGene00044909	pseudogene	lifted_all.ident
WBGene00044914	pseudogene	lifted_all.ident
WBGene00044920	pseudogene	lifted_all.ident
WBGene00044951	pseudogene	lifted_all.ident
WBGene00044960	pseudogene	lifted_all.ident
WBGene00044976	pseudogene	lifted_all.ident
WBGene00044995	pseudogene	lifted_all.ident
WBGene00044997	pseudogene	lifted_all.ident
WBGene00045000	pseudogene	lifted_all.ident
WBGene00045002	pseudogene	lifted_all.ident
WBGene00045003	pseudogene	lifted_all.ident
WBGene00045006	pseudogene	lifted_all.ident
WBGene00045007	pseudogene	lifted_all.ident
WBGene00045009	pseudogene	lifted_all.ident
WBGene00045011	pseudogene	lifted_all.ident
WBGene00045012	pseudogene	lifted_all.ident
WBGene00045016	pseudogene	lifted_all.ident
WBGene00045017	pseudogene	lifted_all.ident
WBGene00045018	pseudogene	lifted_all.ident
WBGene00045019	pseudogene	lifted_all.ident
WBGene00045022	pseudogene	lifted_all.ident
WBGene00045025	pseudogene	lifted_all.ident
WBGene00045026	pseudogene	lifted_all.ident
WBGene00045027	pseudogene	lifted_all.ident
WBGene00045028	pseudogene	lifted_all.ident
WBGene00045029	pseudogene	lifted_all.ident
WBGene00045037	pseudogene	lifted_all.ident
WBGene00045040	pseudogene	lifted_all.ident
WBGene00045045	pseudogene	lifted_all.ident
WBGene00045046	pseudogene	lifted_all.ident
WBGene00045057	pseudogene	lifted_all.ident
WBGene00045059	pseudogene	lifted_all.ident
WBGene00045062	pseudogene	lifted_all.ident
WBGene00045065	pseudogene	lifted_all.ident
WBGene00045066	pseudogene	lifted_all.ident
WBGene00045068	pseudogene	lifted_all.ident
WBGene00045075	pseudogene	lifted_all.ident
WBGene00045076	pseudogene	lifted_all.ident
WBGene00045077	pseudogene	lifted_no.ident
WBGene00045097	pseudogene	lifted_all.ident
WBGene00045098	pseudogene	lifted_all.ident
WBGene00045099	pseudogene	lifted_all.ident
WBGene00045100	pseudogene	lifted_all.ident
WBGene00045102	pseudogene	lifted_all.ident
WBGene00045104	pseudogene	lifted_all.ident
WBGene00045105	pseudogene	lifted_all.ident
WBGene00045106	pseudogene	lifted_all.ident
WBGene00045107	pseudogene	lifted_all.ident
WBGene00045131	pseudogene	lifted_all.ident
WBGene00045143	pseudogene	lifted_all.ident
WBGene00045174	pseudogene	lifted_all.ident
WBGene00045175	pseudogene	lifted_all.ident
WBGene00045179	pseudogene	lifted_all.ident
WBGene00045182	pseudogene	lifted_all.ident
WBGene00045184	pseudogene	lifted_all.ident
WBGene00045185	pseudogene	lifted_all.ident
WBGene00045188	pseudogene	lifted_all.ident
WBGene00045193	pseudogene	lifted_all.ident
WBGene00045197	pseudogene	lifted_all.ident
WBGene00045202	pseudogene	lifted_all.ident
WBGene00045218	pseudogene	lifted_all.ident
WBGene00045235	pseudogene	lifted_all.ident
WBGene00045236	pseudogene	lifted_all.ident
WBGene00045254	pseudogene	lifted_all.ident
WBGene00045273	pseudogene	lifted_all.ident
WBGene00045278	pseudogene	lifted_all.ident
WBGene00045279	pseudogene	lifted_all.ident
WBGene00045280	pseudogene	lifted_all.ident
WBGene00045281	pseudogene	lifted_all.ident
WBGene00045285	pseudogene	lifted_all.ident
WBGene00045286	pseudogene	lifted_all.ident
WBGene00045287	pseudogene	lifted_all.ident
WBGene00045290	pseudogene	lifted_no.ident
WBGene00045293	pseudogene	lifted_all.ident
WBGene00045294	pseudogene	lifted_all.ident
WBGene00045309	pseudogene	lifted_all.ident
WBGene00045311	pseudogene	lifted_all.ident
WBGene00045313	pseudogene	lifted_all.ident
WBGene00045314	pseudogene	lifted_all.ident
WBGene00045315	pseudogene	lifted_all.ident
WBGene00045316	pseudogene	lifted_all.ident
WBGene00045319	pseudogene	lifted_all.ident
WBGene00045321	pseudogene	lifted_all.ident
WBGene00045322	pseudogene	lifted_all.ident
WBGene00045323	pseudogene	lifted_all.ident
WBGene00045332	pseudogene	lifted_all.ident
WBGene00045345	pseudogene	lifted_all.ident
WBGene00045346	pseudogene	lifted_all.ident
WBGene00045347	pseudogene	lifted_all.ident
WBGene00045348	pseudogene	lifted_all.ident
WBGene00045361	pseudogene	lifted_all.ident
WBGene00045363	pseudogene	lifted_all.ident
WBGene00045366	pseudogene	lifted_all.ident
WBGene00045404	pseudogene	lifted_all.ident
WBGene00045408	pseudogene	lifted_all.ident
WBGene00045410	pseudogene	lifted_all.ident
WBGene00045487	pseudogene	lifted_all.ident
WBGene00045491	pseudogene	lifted_all.ident
WBGene00045492	pseudogene	lifted_all.ident
WBGene00045496	pseudogene	lifted_all.ident
WBGene00045502	pseudogene	lifted_all.ident
WBGene00045509	pseudogene	lifted_all.ident
WBGene00045514	pseudogene	lifted_all.ident
WBGene00045516	pseudogene	lifted_all.ident
WBGene00050878	pseudogene	lifted_all.ident
WBGene00050883	pseudogene	lifted_all.ident
WBGene00050890	pseudogene	lifted_all.ident
WBGene00050897	pseudogene	lifted_all.ident
WBGene00050900	pseudogene	lifted_all.ident
WBGene00050902	pseudogene	lifted_all.ident
WBGene00050903	pseudogene	lifted_all.ident
WBGene00050912	pseudogene	lifted_all.ident
WBGene00050920	pseudogene	lifted_all.ident
WBGene00050926	pseudogene	lifted_all.ident
WBGene00050927	pseudogene	lifted_all.ident
WBGene00050928	pseudogene	lifted_all.ident
WBGene00050930	pseudogene	lifted_all.ident
WBGene00050932	pseudogene	lifted_all.ident
WBGene00050933	pseudogene	lifted_all.ident
WBGene00050935	pseudogene	lifted_all.ident
WBGene00050938	pseudogene	lifted_all.ident
WBGene00050945	pseudogene	lifted_all.ident
WBGene00050946	pseudogene	lifted_all.ident
WBGene00050948	pseudogene	lifted_all.ident
WBGene00050949	pseudogene	lifted_all.ident
WBGene00050950	pseudogene	lifted_all.ident
WBGene00050951	pseudogene	lifted_all.ident
WBGene00050954	pseudogene	lifted_all.ident
WBGene00050958	pseudogene	lifted_all.ident
WBGene00050960	pseudogene	lifted_all.ident
WBGene00050961	pseudogene	lifted_all.ident
WBGene00050962	pseudogene	lifted_all.ident
WBGene00050963	pseudogene	lifted_all.ident
WBGene00050964	pseudogene	lifted_all.ident
WBGene00050970	pseudogene	lifted_all.ident
WBGene00050971	pseudogene	lifted_all.ident
WBGene00050972	pseudogene	lifted_all.ident
WBGene00050973	pseudogene	lifted_all.ident
WBGene00050974	pseudogene	lifted_all.ident
WBGene00050976	pseudogene	lifted_all.ident
WBGene00050977	pseudogene	lifted_all.ident
WBGene00077434	pseudogene	lifted_all.ident
WBGene00077436	pseudogene	lifted_all.ident
WBGene00077437	pseudogene	lifted_all.ident
WBGene00077438	pseudogene	lifted_all.ident
WBGene00077440	pseudogene	lifted_no.ident
WBGene00077441	pseudogene	lifted_all.ident
WBGene00077442	pseudogene	lifted_all.ident
WBGene00077443	pseudogene	lifted_all.ident
WBGene00077444	pseudogene	lifted_all.ident
WBGene00077446	pseudogene	lifted_all.ident
WBGene00077447	pseudogene	lifted_all.ident
WBGene00077448	pseudogene	lifted_all.ident
WBGene00077449	pseudogene	lifted_all.ident
WBGene00077451	pseudogene	lifted_all.ident
WBGene00077454	pseudogene	lifted_all.ident
WBGene00077456	pseudogene	lifted_all.ident
WBGene00077457	pseudogene	lifted_all.ident
WBGene00077459	pseudogene	lifted_all.ident
WBGene00077460	pseudogene	lifted_all.ident
WBGene00077463	pseudogene	lifted_all.ident
WBGene00077494	pseudogene	lifted_all.ident
WBGene00077496	pseudogene	lifted_all.ident
WBGene00077498	pseudogene	lifted_all.ident
WBGene00077499	pseudogene	lifted_all.ident
WBGene00077501	pseudogene	lifted_all.ident
WBGene00077502	pseudogene	lifted_all.ident
WBGene00077504	pseudogene	lifted_all.ident
WBGene00077506	pseudogene	lifted_all.ident
WBGene00077510	pseudogene	lifted_all.ident
WBGene00077524	pseudogene	lifted_all.ident
WBGene00077527	pseudogene	lifted_all.ident
WBGene00077534	pseudogene	lifted_all.ident
WBGene00077535	pseudogene	lifted_all.ident
WBGene00077537	pseudogene	lifted_all.ident
WBGene00077549	pseudogene	lifted_all.ident
WBGene00077551	pseudogene	lifted_all.ident
WBGene00077552	pseudogene	lifted_all.ident
WBGene00077555	pseudogene	lifted_all.ident
WBGene00077556	pseudogene	lifted_all.ident
WBGene00077561	pseudogene	lifted_all.ident
WBGene00077564	pseudogene	lifted_all.ident
WBGene00077566	pseudogene	lifted_all.ident
WBGene00077567	pseudogene	lifted_all.ident
WBGene00077568	pseudogene	lifted_all.ident
WBGene00077570	pseudogene	lifted_all.ident
WBGene00077571	pseudogene	lifted_all.ident
WBGene00077572	pseudogene	lifted_all.ident
WBGene00077574	pseudogene	lifted_all.ident
WBGene00077575	pseudogene	lifted_all.ident
WBGene00077579	pseudogene	lifted_all.ident
WBGene00077580	pseudogene	lifted_all.ident
WBGene00077581	pseudogene	lifted_all.ident
WBGene00077584	pseudogene	lifted_all.ident
WBGene00077586	pseudogene	lifted_all.ident
WBGene00077589	pseudogene	lifted_all.ident
WBGene00077590	pseudogene	lifted_all.ident
WBGene00077594	pseudogene	lifted_all.ident
WBGene00077595	pseudogene	lifted_all.ident
WBGene00077596	pseudogene	lifted_all.ident
WBGene00077597	pseudogene	lifted_all.ident
WBGene00077598	pseudogene	lifted_all.ident
WBGene00077600	pseudogene	lifted_all.ident
WBGene00077601	pseudogene	lifted_all.ident
WBGene00077602	pseudogene	lifted_all.ident
WBGene00077603	pseudogene	lifted_all.ident
WBGene00077604	pseudogene	lifted_all.ident
WBGene00077605	pseudogene	lifted_all.ident
WBGene00077606	pseudogene	lifted_all.ident
WBGene00077608	pseudogene	lifted_all.ident
WBGene00077609	pseudogene	lifted_all.ident
WBGene00077610	pseudogene	lifted_all.ident
WBGene00077611	pseudogene	lifted_all.ident
WBGene00077612	pseudogene	lifted_all.ident
WBGene00077613	pseudogene	lifted_all.ident
WBGene00077614	pseudogene	lifted_all.ident
WBGene00077615	pseudogene	lifted_all.ident
WBGene00077617	pseudogene	lifted_all.ident
WBGene00077618	pseudogene	lifted_all.ident
WBGene00077619	pseudogene	lifted_all.ident
WBGene00077620	pseudogene	lifted_all.ident
WBGene00077621	pseudogene	lifted_all.ident
WBGene00077625	pseudogene	lifted_all.ident
WBGene00077626	pseudogene	lifted_all.ident
WBGene00077627	pseudogene	lifted_all.ident
WBGene00077629	pseudogene	lifted_all.ident
WBGene00077630	pseudogene	lifted_all.ident
WBGene00077631	pseudogene	lifted_all.ident
WBGene00077632	pseudogene	lifted_all.ident
WBGene00077633	pseudogene	lifted_all.ident
WBGene00077634	pseudogene	lifted_all.ident
WBGene00077635	pseudogene	lifted_all.ident
WBGene00077636	pseudogene	lifted_all.ident
WBGene00077637	pseudogene	lifted_all.ident
WBGene00077638	pseudogene	lifted_all.ident
WBGene00077641	pseudogene	lifted_all.ident
WBGene00077642	pseudogene	lifted_all.ident
WBGene00077644	pseudogene	lifted_all.ident
WBGene00077646	pseudogene	lifted_no.ident
WBGene00077647	pseudogene	lifted_all.ident
WBGene00077648	pseudogene	lifted_all.ident
WBGene00077649	pseudogene	lifted_all.ident
WBGene00077650	pseudogene	lifted_all.ident
WBGene00077651	pseudogene	lifted_all.ident
WBGene00077652	pseudogene	lifted_all.ident
WBGene00077653	pseudogene	lifted_all.ident
WBGene00077654	pseudogene	lifted_all.ident
WBGene00077656	pseudogene	lifted_all.ident
WBGene00077657	pseudogene	lifted_all.ident
WBGene00077659	pseudogene	lifted_all.ident
WBGene00077660	pseudogene	lifted_all.ident
WBGene00077662	pseudogene	lifted_all.ident
WBGene00077664	pseudogene	lifted_all.ident
WBGene00077666	pseudogene	lifted_all.ident
WBGene00077667	pseudogene	lifted_all.ident
WBGene00077670	pseudogene	lifted_all.ident
WBGene00077671	pseudogene	lifted_all.ident
WBGene00077686	pseudogene	lifted_all.ident
WBGene00077687	pseudogene	lifted_all.ident
WBGene00077689	pseudogene	lifted_all.ident
WBGene00077694	pseudogene	lifted_all.ident
WBGene00077695	pseudogene	lifted_all.ident
WBGene00077750	pseudogene	lifted_all.ident
WBGene00077753	pseudogene	lifted_all.ident
WBGene00077754	pseudogene	lifted_all.ident
WBGene00077755	pseudogene	lifted_all.ident
WBGene00077765	pseudogene	lifted_all.ident
WBGene00077767	pseudogene	lifted_all.ident
WBGene00077772	pseudogene	lifted_all.ident
WBGene00077781	pseudogene	lifted_all.ident
WBGene00077784	pseudogene	lifted_all.ident
WBGene00077785	pseudogene	lifted_all.ident
WBGene00077789	pseudogene	lifted_all.ident
WBGene00164983	pseudogene	lifted_no.ident
WBGene00175025	pseudogene	lifted_all.ident
WBGene00175036	pseudogene	lifted_all.ident
WBGene00185093	pseudogene	lifted_all.ident
WBGene00185119	pseudogene	lifted_all.ident
WBGene00189944	pseudogene	lifted_all.ident
WBGene00189946	pseudogene	lifted_all.ident
WBGene00194644	pseudogene	lifted_all.ident
WBGene00194650	pseudogene	lifted_all.ident
WBGene00194652	pseudogene	lifted_all.ident
WBGene00194657	pseudogene	lifted_all.ident
WBGene00194667	pseudogene	lifted_all.ident
WBGene00194675	pseudogene	lifted_all.ident
WBGene00194676	pseudogene	lifted_all.ident
WBGene00194683	pseudogene	lifted_all.ident
WBGene00194716	pseudogene	lifted_all.ident
WBGene00194768	pseudogene	lifted_no.ident
WBGene00194769	pseudogene	lifted_all.ident
WBGene00194786	pseudogene	lifted_all.ident
WBGene00194794	pseudogene	lifted_all.ident
WBGene00194812	pseudogene	lifted_all.ident
WBGene00194836	pseudogene	lifted_all.ident
WBGene00194843	pseudogene	lifted_all.ident
WBGene00194844	pseudogene	lifted_all.ident
WBGene00194885	pseudogene	lifted_all.ident
WBGene00194891	pseudogene	lifted_all.ident
WBGene00194932	pseudogene	lifted_all.ident
WBGene00194939	pseudogene	lifted_all.ident
WBGene00194945	pseudogene	lifted_all.ident
WBGene00195192	pseudogene	lifted_all.ident
WBGene00195247	pseudogene	lifted_all.ident
WBGene00195253	pseudogene	lifted_all.ident
WBGene00195254	pseudogene	lifted_all.ident
WBGene00195255	pseudogene	lifted_all.ident
WBGene00195257	pseudogene	lifted_all.ident
WBGene00202499	pseudogene	lifted_all.ident
WBGene00206394	pseudogene	lifted_all.ident
WBGene00206411	pseudogene	lifted_all.ident
WBGene00206420	pseudogene	lifted_no.ident
WBGene00206459	pseudogene	lifted_all.ident
WBGene00206470	pseudogene	lifted_all.ident
WBGene00206491	pseudogene	lifted_all.ident
WBGene00206509	pseudogene	lifted_no.ident
WBGene00206536	pseudogene	lifted_all.ident
WBGene00215616	pseudogene	lifted_all.ident
WBGene00219238	pseudogene	lifted_all.ident
WBGene00219279	pseudogene	lifted_all.ident
WBGene00219292	pseudogene	lifted_all.ident
WBGene00219303	pseudogene	lifted_all.ident
WBGene00219304	pseudogene	lifted_all.ident
WBGene00219307	pseudogene	lifted_all.ident
WBGene00219311	pseudogene	lifted_all.ident
WBGene00219312	pseudogene	lifted_all.ident
WBGene00219323	pseudogene	lifted_all.ident
WBGene00219331	pseudogene	lifted_all.ident
WBGene00219352	pseudogene	lifted_all.ident
WBGene00219377	pseudogene	lifted_all.ident
WBGene00219417	pseudogene	lifted_all.ident
WBGene00219442	pseudogene	lifted_all.ident
WBGene00219477	pseudogene	lifted_all.ident
WBGene00219492	pseudogene	lifted_all.ident
WBGene00219549	pseudogene	lifted_all.ident
WBGene00219554	pseudogene	lifted_all.ident
WBGene00235003	pseudogene	lifted_all.ident
WBGene00235089	pseudogene	lifted_all.ident
WBGene00235119	pseudogene	lifted_all.ident
WBGene00235121	pseudogene	lifted_all.ident
WBGene00235259	pseudogene	lifted_all.ident
WBGene00235266	pseudogene	lifted_all.ident
WBGene00235270	pseudogene	lifted_all.ident
WBGene00235272	pseudogene	lifted_all.ident
WBGene00235276	pseudogene	lifted_all.ident
WBGene00235278	pseudogene	lifted_all.ident
WBGene00235281	pseudogene	lifted_all.ident
WBGene00235287	pseudogene	lifted_no.ident
WBGene00235292	pseudogene	lifted_all.ident
WBGene00235307	pseudogene	lifted_all.ident
WBGene00235319	pseudogene	lifted_all.ident
WBGene00235338	pseudogene	lifted_all.ident
WBGene00235353	pseudogene	lifted_all.ident
WBGene00235355	pseudogene	lifted_all.ident
WBGene00235362	pseudogene	lifted_all.ident
WBGene00235366	pseudogene	lifted_all.ident
WBGene00235369	pseudogene	lifted_all.ident
WBGene00235370	pseudogene	lifted_all.ident
WBGene00235375	pseudogene	lifted_all.ident
WBGene00235376	pseudogene	lifted_no.ident
WBGene00235377	pseudogene	lifted_all.ident
WBGene00235381	pseudogene	lifted_all.ident
WBGene00235382	pseudogene	lifted_all.ident
WBGene00235385	pseudogene	lifted_all.ident
WBGene00236788	pseudogene	lifted_all.ident
WBGene00236807	pseudogene	lifted_all.ident
WBGene00249816	pseudogene	lifted_all.ident
WBGene00249825	pseudogene	lifted_all.ident
WBGene00255543	pseudogene	lifted_all.ident
WBGene00255596	pseudogene	lifted_all.ident
WBGene00255728	pseudogene	lifted_all.ident
WBGene00255730	pseudogene	lifted_all.ident
WBGene00268189	pseudogene	lifted_all.ident
WBGene00268190	pseudogene	lifted_all.ident
WBGene00268191	pseudogene	lifted_all.ident
WBGene00268192	pseudogene	lifted_all.ident
WBGene00268193	pseudogene	lifted_all.ident
WBGene00268203	pseudogene	lifted_all.ident
WBGene00268204	pseudogene	lifted_all.ident
WBGene00268205	pseudogene	lifted_all.ident
WBGene00268207	pseudogene	lifted_all.ident
WBGene00268209	pseudogene	lifted_all.ident
WBGene00268210	pseudogene	lifted_all.ident
WBGene00268211	pseudogene	lifted_all.ident
WBGene00268214	pseudogene	lifted_all.ident
WBGene00269331	pseudogene	lifted_all.ident
WBGene00269338	pseudogene	lifted_all.ident
WBGene00269390	pseudogene	lifted_all.ident
WBGene00269393	pseudogene	lifted_all.ident
WBGene00269419	pseudogene	lifted_all.ident
WBGene00269420	pseudogene	lifted_all.ident
WBGene00269423	pseudogene	lifted_all.ident
WBGene00269426	pseudogene	lifted_all.ident
WBGene00269430	pseudogene	lifted_all.ident
WBGene00269436	pseudogene	lifted_all.ident
WBGene00270291	pseudogene	lifted_all.ident
WBGene00270292	pseudogene	lifted_all.ident
WBGene00271598	pseudogene	lifted_all.ident
WBGene00271716	pseudogene	lifted_all.ident
WBGene00271786	pseudogene	lifted_all.ident
WBGene00271792	pseudogene	lifted_all.ident
WBGene00271799	pseudogene	lifted_all.ident
WBGene00271800	pseudogene	lifted_bad.coding
WBGene00271801	pseudogene	lifted_all.ident
WBGene00271802	pseudogene	lifted_all.ident
WBGene00271811	pseudogene	lifted_all.ident
WBGene00271820	pseudogene	lifted_all.ident
WBGene00271823	pseudogene	lifted_all.ident
