# Supplementary material for: Recompleting the Caenorhabditis elegans genome
Source: HighWire-hosted journal article supplement (doi:10.1101/gr.244830.118), 2019-05-23
Supplement: Supplemental_Table_S9.xlsx [file Supplemental_Table_S9.xlsx]

## Sheet: VC2010_Supp_Table_09
Chromosome	Start of TR in ce10	End of TR in ce10	Start of TR in VC2010	End of TR in VC2010	Length of TR unit in ce10	Length of TR unit in VC2010	Num. of TR units in N2 (ce10)	Num. of TR units in VC2010	Length of the difference	TR unit in N2 (ce10)	TR unit in VC2010	TR units are identical ?	Covered by raw PacBio reads?	Gap length of alignments of reads with VC2010
chrI	1	432	1	2265	6	6	72	378	1836	GCCTAA	GCCTAA	TRUE	Yes	2
chrI	669652	670472	671504	680949	32	32	25.3	295	8630.4	AATTTTGGCGGGAATTCAAATTTTCTGAGAAA	AATTTTGGCGGGAATTCAAATTTTCTGAGAAA	TRUE	Yes	24
chrI	933482	934917	943053	953359	27	27	53.6	383.6	8910	ATATTTTACTCTCTGTGGCTTCCCACT	ATATTTTACTCTCTGTGGCTTCCCACT	TRUE	Yes	12
chrI	1935239	1938260	1961556	1968308	35	35	86.5	193.5	3745	ATTGCCGATTTGCCGGAAATTTTCAGTTTCGGCAA	ATTGCCGATTTGCCGGAAATTTTCAGTTTCGGCAA	TRUE	Yes	0
chrI	2542917	2544001	2574456	2585304	19	19	57.1	572.1	9785	TAGATTGTTACACGAAAAA	TAGATTGTTACACGAAAAA	TRUE	Yes	48
chrI	3171652	3172430	3213784	3217734	26	26	30	152	3172	GAACGGCCAGAGTCACTATTTTTGGG	GAACGGCCAGAGTCACTATTTTTGGG	TRUE	Yes	0
chrI	3389969	3393348	3435419	3440282	45	30	75.1	162.2	1486.5	GGGTCTCACCACGAT GGGTCTCACCACGAA GGGTCTCACCACGAA	GGGTCTCACCACGAA GGGTCTCACCACGAA	FALSE	Yes	0
chrI	3664195	3666140	3711970	3716636	26	26	74.9	179.7	2724.8	TTTTAGGTGAATGGTTAGAGTCATAT	TTTTAGGTGAATGGTTAGAGTCATAT	TRUE	Yes	5
chrI	7868920	7869502	8015055	8017034	40	40	14.6	49.6	1400	TCGAGAAAATTCTGGAATGTTCCAGAACTTTCTAGAAAAA	TCGAGAAAATTCTGGAATGTTCCAGAACTTTCTAGAAAAA	TRUE	Yes	0
chrI	10204096	10219216	10374806	10387363	68	68	224.8	185.8	-2652	TTTTGGTAAAAGAAAACCATTGTCAACTGAATAGGTTGATTTGTGTTTTCTTTCTGAAATTCTAAGAA	TTTTGGTAAAAGAAAACCATTGTCAACTGAATAGGTTGATTTGTGTTTTCTTTCTGAAATTCTAAGAA	TRUE	Partially	57
chrI	10945928	10953015	11137317	11159613	85	85	81.3	261.3	15300	ATGGAGCACCAAATAGCACCAATTTAGCACCAATGGAGCACCAAATAGCACCGATGGAGCACCAAATAGCACCAATTTAGCACCG	ATGGAGCACCAAATAGCACCAATTTAGCACCAATGGAGCACCAAATAGCACCGATGGAGCACCAAATAGCACCAATTTAGCACCG	TRUE	Partially	684
chrI	11384362	11386359	11592267	11597904	20	20	99.9	282	3642	GAAATTATTGATTTTTTGAG	GAAATTATTGATTTTTTGAG	TRUE	Yes	0
chrI	12093560	12094308	12310644	12315099	11	11	67.7	401.7	3674	CACATTTTTTG	CACATTTTTTG	TRUE	Yes	0
chrI	13231012	13231669	13456758	13461911	40	40	16.2	128.2	4480	GAAAATTCTGAAATGTTCCAGAACTTTCTAGAAAAATCGA	GAAAATTCTGAAATGTTCCAGAACTTTCTAGAAAAATCGA	TRUE	Yes	0
chrI	14452244	14454647	14697045	14704558	35	35	68.8	214.8	5110	TGCCGATTTGCCGGAAATTTTCACTTTCGGTAAAT	TGCCGATTTGCCGGAAATTTTCACTTTCGGTAAAT	TRUE	Yes	0
chrII	500818	502720	503707	507142	191	191	9.9	17.9	1528	ACATCAAAATGAAACTGTAATTTCAAAAAAAAAACCCCTTTGAATAGGACGAAATGTCCCTGGAGTAACACCCAATGACAAGAGACTTTGATCTCAATTAATTTTGAACTTAAAGTTTCTGCTTGATATACCAATAGGAGAGCACAGTGTGAACAACTTTTCATAATTCTCACGGCACCAGCACCCGTAGT	ACATCAAAATGAAACTGTAATTTCAAAAAAAAAACCCCTTTGAATAGGACGAAATGTCCCTGGAGTAACACCCAATGACAAGAGACTTTGATCTCAATTAATTTTGAACTTAAAGTTTCTGCTTGATATACCAATAGGAGAGCACAGTGTGAACAACTTTTCATAATTCTCACGGCACCAGCACCCGTAGT	TRUE	Yes	0
chrII	1970456	1970824	1992816	1994300	62	62	6	24	1116	GAGTTGTCGAGCGAGACCTCAGAAGAGAGCTGAGTTGTCTAGCGAGATAGCAGAGAAGAGAT	GAGTTGTCGAGCGAGACCTCAGAAGAGAGCTGAGTTGTCTAGCGAGATAGCAGAGAAGAGAT	TRUE	Yes	0
chrII	2570141	2571133	2588225	2596808	24	23	44.3	384.3	7775.7	AAAAACCGGCAAAAAATCTTTTA	AAAAACCGGCAAAAAATCTTTTA	TRUE	Yes	0
chrII	3159514	3168550	3189713	3209379	162	161	54.8	120.8	10571.2	ATTATGGGTACGATTCGGGGTCTAGAAATTCGATTTTGGCCCCGCTAGAGGCGTTTTGGTCTTCAATTAATTTTTTACATACATATGCGCTTTTTTGCAAAAAAAAAATTTGGAATTTTGCGAGAATTTTTATAAAAATGGATTGCTAATTTTTTTTTAGT	ATTATGGGTACGATTCGGGGTCTAGAAATTCGATTTTGGCCCCGCTAGAGGCGTTTTGGTCTTCAATTAATTTTTTACATACATATGCGCTTTTTTGCAAAAAAAAAATTTGGAATTTTGCGAGAATTTTTATAAAAATGGATTGCTAATTTTTTTTTAGT	TRUE	Yes	156
chrII	3464829	3469730	3505654	3514461	9	9	545.7	979.7	3906	TGCTCAAGG	TGCTCAAGG	TRUE	Yes	0
chrII	5073418	5077414	5140544	5141021	76	76	51.6	6.2	-3450.4	TGGAAGACTACAGAAAAACTATTGAGAGACCCCGAAATACTGGCTGTATTTTGAAAGGTCATCTCAATAGAAAAGA	TGGAAGACTACAGAAAAACTATTGAGAGACCCCGAAATACTGGCTGTATTTTGAAAGGTCATCTCAATAGAAAAGA	TRUE	Partially	27
chrII	5097188	5097902	5166220	5171027	26	26	27.5	185.5	4108	AGTTAGACCATTAGATGAATTTCCAA	AGTTAGACCATTAGATGAATTTCCAA	TRUE	Yes	9
chrII	9404774	9405355	9530986	9537399	25	25	23.4	257.4	5850	ATATTTTACTCTCTGGCTTCACAGT	ATATTTTACTCTCTGGCTTCACAGT	TRUE	Yes	23
chrII	9807879	9825316	9939408	9944318	59	59	294.8	83.8	-12449	TCTCAATAATTCTCAGTTTAAAAAAATTTGAAAACCAGTGCACAATTGAAACTCCATAT	TCTCAATAATTCTCAGTTTAAAAAAATTTGAAAACCAGTGCACAATTGAAACTCCATAT	TRUE	Yes	3
chrII	13598616	13599844	13755424	13762969	45	45	27.3	167.3	6300	ATCCTTCGGAGCTGAATGATCAGATCACCAGGAGGTACCCTTCTT	ATCCTTCGGAGCTGAATGATCAGATCACCAGGAGGTACCCTTCTT	TRUE	Yes	9
chrII	13940082	13941403	14112346	14115907	448	448	2.9	7.9	2240	GATACTGTAGTAGTACTGTAGGGGTACTGTATTAGTACTGCAGTGGTACCGTACTAGTACTGTAGGTGTACTGAAGTTTTGGAAAAACAGCACTAATACAGTACCCCATACAGCACTGATACAATATTGCTACAGGATACTGTATTAGGATTGTAGGGATACTGTAGTAGCACTGTAGGGGTACTGTATTAGTACTGCAGCGGTACCGTACTAGTACTGTAGGTGTACTGAAGTTTTGGAAAAACAGCACTAATACAGTACCCCATACAGCACTGATACAATATTGCTACAGGATACTGTATTCGGATTGTAGGGATACTGTATTAGTACTGTAGGGGTACTGTATTAGTACTGTAGTGGTACCGTACTAATACAGTAGGTGTACTGAAGTTTTGGAAA…	GATACTGTAGTAGTACTGTAGGGGTACTGTATTAGTACTGCAGTGGTACCGTACTAGTACTGTAGGTGTACTGAAGTTTTGGAAAAACAGCACTAATACAGTACCCCATACAGCACTGATACAATATTGCTACAGGATACTGTATTAGGATTGTAGGGATACTGTAGTAGCACTGTAGGGGTACTGTATTAGTACTGCAGCGGTACCGTACTAGTACTGTAGGTGTACTGAAGTTTTGGAAAAACAGCACTAATACAGTACCCCATACAGCACTGATACAATATTGCTACAGGATACTGTATTCGGATTGTAGGGATACTGTATTAGTACTGTAGGGGTACTGTATTAGTACTGTAGTGGTACCGTACTAATACAGTAGGTGTACTGAAGTTTTGGAAA…	TRUE	Yes	0
chrIII	321783	332878	327503	343338	305	305	36.2	51.7	4727.5	ATTAGATGGCTTAAAAAAATTTGGGCAAAAATAAAAAGTTGTCTAATTTTGTTGAAAATGGGTAATTCATGTATGCTGCATTTACAAAATCTAGGTTTAACCTATCAAAAATTGCTAAAAAGTGGCAAAAATGACAATTTATGGCAAAAAATCACAATTTTGAAGTTCCCATAAAATGGTTAGTTTTATAGTTAGAGGACTCAAAATTGATTTTCTAAGTCTTAAAAATTGCCCTTTTTCAGAATATATTGGTGTTGTACAATTTCCAAAAAATTATTTTTTTTGCCCAAAAAAAAAAGGACAGTC	ATTAGATGGCTTAAAAAAATTTGGGCAAAAATAAAAAGTTGTCTAATTTTGTTGAAAATGGGTAATTCATGTATGCTGCATTTACAAAATCTAGGTTTAACCTATCAAAAATTGCTAAAAAGTGGCAAAAATGACAATTTATGGCAAAAAATCACAATTTTGAAGTTCCCATAAAATGGTTAGTTTTATAGTTAGAGGACTCAAAATTGATTTTCTAAGTCTTAAAAATTGCCCTTTTTCAGAATATATTGGTGTTGTACAATTTCCAAAAAATTATTTTTTTTGCCCAAAAAAAAAAGGACAGTC	TRUE	Yes	2
chrIII	931239	931708	958146	973706	27	27	17.3	575.3	15066	ACAGAGAGTAAAATATAGTGGGAAGCC	ACAGAGAGTAAAATATAGTGGGAAGCC	TRUE	Partially	104
chrIII	1362771	1370127	1442278	1450930	162	162	45.4	53.4	1296	TTTTTCAAAAATTCAAAAGTACCTGAAAATCATATGGAGTCATTCTTTTTTATTTTATAAAACTGTTTAGCAGTGTCAAATATACCAGAAAATACCAGAAAAAGTATGTTAGCTTGTACGGAAGTTTATTTTAAAAAATGCAGAATTTAATAAAAAGCTGTA	TTTTTCAAAAATTCAAAAGTACCTGAAAATCATATGGAGTCATTCTTTTTTATTTTATAAAACTGTTTAGCAGTGTCAAATATACCAGAAAATACCAGAAAAAGTATGTTAGCTTGTACGGAAGTTTATTTTAAAAAATGCAGAATTTAATAAAAAGCTGTA	TRUE	Yes	0
chrIII	2497017	2501725	2604613	2620886	25	25	188.2	654.2	11650	GTAAAATATATGGTGAAGCCAGAGA	GTAAAATATATGGTGAAGCCAGAGA	TRUE	Partially	65
chrIII	3334329	3337085	3456372	3470381	25	25	110.3	560.3	11250	CTCTGGCTTCCCATCATATTTTACT	CTCTGGCTTCCCATCATATTTTACT	TRUE	Yes	50
chrIII	3897076	3897692	4031388	4033004	40	40	15.4	40.4	1000	TCGAGAAAATTCTGGAATGTTCCAGAACTTTCTAGAAAAA	TCGAGAAAATTCTGGAATGTTCCAGAACTTTCTAGAAAAA	TRUE	Yes	0
chrIII	5353128	5357400	5494311	5534875	26	26	164.3	1563.8	36387	TTTAGGTGAATGGTTAGAGTCATTAT	TTTAGGTGAATGGTTAGAGTCATTAT	TRUE	No	NA
chrIII	6566933	6573234	6746894	6755239	123	122	52.7	70.7	2143.3	GAAGAGGTATTGGGTTGGGAGTTGCTGGGGGATAATGTCAAGGTACTGTAGTAGTACTGTAGGAGTACTGTAGGTATACGGTAGGGTTACTGTAGTTTAGGAAAAATTGAGTTTTTGTCTACA	GAAGAGGTATTGGGTTGGGAGTTGCTGGGGGATAATGTCAAGGTACTGTAGTAGTACTGTAGGAGTACTGTAGGTATACGGTAGGGTTACTGTAGTTTAGGAAAAATTGAGTTTTTGTCTACA	TRUE	Yes	11
chrIII	8862192	8863883	9125488	9139755	96	96	17.1	144.1	12192	AGGATCAACAGCTTCTCCACCAACTGGAACCACCGATGAGCCTGGATCTTCAGTTGAGACTACACCATATACCGGTGAGACTCCATCAGTACCTAC	AGGATCAACAGCTTCTCCACCAACTGGAACCACCGATGAGCCTGGATCTTCAGTTGAGACTACACCATATACCGGTGAGACTCCATCAGTACCTAC	TRUE	Yes	2
chrIII	10226030	10227778	10519572	10525401	164	164	10.7	35.7	4100	ATGCCAATCAAAGTATAATAGCTTGTACGGAAGTATTTTTTTAAAAATTGATAAAAAATATATAAAAGCTGATTTTTTCAAAAATTCAAAAGTATGGGAAAATCATATGGAGTCATTCTTTTTTATTGCATAAAACTGTTCAGTATAGTCAAAAATACCAGAAT	ATGCCAATCAAAGTATAATAGCTTGTACGGAAGTATTTTTTTAAAAATTGATAAAAAATATATAAAAGCTGATTTTTTCAAAAATTCAAAAGTATGGGAAAATCATATGGAGTCATTCTTTTTTATTGCATAAAACTGTTCAGTATAGTCAAAAATACCAGAAT	TRUE	Yes	2
chrIII	11428981	11436772	11729905	11741474	43	43	181.5	269.5	3784	TTTGCCGGTTTGCCGATTTGCAAGAAATTTTAAATTCCGGCAA	TTTGCCGGTTTGCCGATTTGCAAGAAATTTTAAATTCCGGCAA	TRUE	Yes	0
chrIII	13032117	13032784	13335991	13337831	10	10	67.7	184.7	1170	CGCCCGCTAC	CGCCCGCTAC	TRUE	Yes	1
chrIII	13446925	13447822	13762919	13765376	40	40	22.5	61.5	1560	GGAACATTCCAGAATTTTCCCAATTTTTCTAGAAAGTTCT	GGAACATTCCAGAATTTTCCCAATTTTTCTAGAAAGTTCT	TRUE	Yes	0
chrIV	1831022	1831694	1845844	1850072	22	22	33	209	3872	TCTGGGGTAGGCTGCCTAGGA	TCTGGGGTAGGCTGCCTAGGA	TRUE	Yes	0
chrIV	1931262	1933468	1949632	1950699	35	35	63.6	31.6	-1120	TTTGCCGGAAATTTCCATTTTCGCCGAATTGCCGG	TTTGCCGGAAATTTCCATTTTCGCCGAATTGCCGG	TRUE	Yes	0
chrIV	4416445	4422024	4479505	4488125	26	26	214.2	332.2	3068	TAACTTTGGAAATTCATCTAATGGTC	TAACTTTGGAAATTCATCTAATGGTC	TRUE	Yes	20
chrIV	5464975	5467153	5529413	5534712	48	48	45.4	110.4	3120	TTTTGATTTGCCCGTAATTTATATTTTTCTGAAGATGAGCAATTCAAT	TTTTGATTTGCCCGTAATTTATATTTTTCTGAAGATGAGCAATTCAAT	TRUE	Yes	0
chrIV	8572630	8581883	8607399	8623710	20	20	467.6	832.7	7302	ACGATACGATATAGCTATTT	ACGATACGATATAGCTATTT	TRUE	Partially	480
chrIV	10943431	10946236	11013673	11031370	45	45	16	394.7	17041.5	ATCTGATCCTTAAGCTCCGAAGGATCAGAAGGGTACCTCCTGGTG	ATCTGATCCTTAAGCTCCGAAGGATCAGAAGGGTACCTCCTGGTG	TRUE	Partially	38
chrIV	11070914	11072373	11170588	11180849	9	9	163.1	1136.1	8757	TACCTAGAC	TACCTAGAC	TRUE	Yes	9
chrIV	11072373	11075921	11180849	11199203	39	39	90.6	472.6	14898	TTATGGAAAAGTGGCTCTAGAGCCACAAGAAATACCAGT	TTATGGAAAAGTGGCTCTAGAGCCACAAGAAATACCAGT	TRUE	Yes	35
chrIV	11610513	11615511	11734640	11742712	25	25	199.9	322.9	3075	AAATTGGCATTACGGCAGATTCTAT	AAATTGGCATTACGGCAGATTCTAT	TRUE	Yes	0
chrIV	12022966	12025458	12150480	12159542	32	32	77.8	282.8	6560	TTTTGGCGGGAATTCAAAATTTCTGTGAAAAA	TTTTGGCGGGAATTCAAAATTTCTGTGAAAAA	TRUE	Yes	1
chrIV	12891341	12891781	13061020	13070580	48	48	9.2	199.2	9120	TTCAGAAAATTATAAATTACGGGCAAATCAAAAATTAAATTGCTCATC	TTCAGAAAATTATAAATTACGGGCAAATCAAAAATTAAATTGCTCATC	TRUE	Yes	1
chrIV	12932147	12932795	13110946	13113106	168	168	3.9	12.9	1512	TTTTATTTTTGTTTTTTTGAGCCTACTAGTACCTGTGAAAATTGGAACTCGACACAAAAACCTCTCTAGCGCGGCTTAAATTTACTTTCCTGGCCCACAAACTTACCAATAATATTTTTAAAAAATCTAGAATCCAAATCTATCAAAACATTTCCGGAATTCGATAAT	TTTTATTTTTGTTTTTTTGAGCCTACTAGTACCTGTGAAAATTGGAACTCGACACAAAAACCTCTCTAGCGCGGCTTAAATTTACTTTCCTGGCCCACAAACTTACCAATAATATTTTTAAAAAATCTAGAATCCAAATCTATCAAAACATTTCCGGAATTCGATAAT	TRUE	Yes	0
chrIV	13929782	13933268	14119224	14123735	34	34	102.2	132.2	1020	ATTTTCAGTGAAAAAATTTTGGCGGGAAATTCAA	ATTTTCAGTGAAAAAATTTTGGCGGGAAATTCAA	TRUE	Yes	0
chrIV	14057115	14059275	14247582	14258886	127	127	17	89	9144	TTTTTAAAATGAAAGACAATAAATTCAAATGACCTACAACTTTTCTGAATATCTCAAAAATGAAAACTCAAAAAAGATGATCACTCGAACTAAATGCCCAGAAATTTTATTTTTGTTTTTAAATGAA	TTTTTAAAATGAAAGACAATAAATTCAAATGACCTACAACTTTTCTGAATATCTCAAAAATGAAAACTCAAAAAAGATGATCACTCGAACTAAATGCCCAGAAATTTTATTTTTGTTTTTAAATGAA	TRUE	Yes	1
chrIV	15059087	15059787	15280468	15283925	40	40	17.5	86.6	2764	TTCTGGAACATTCCAGAATTTTCCCGATTTTTCTAGAAAG	TTCTGGAACATTCCAGAATTTTCCCGATTTTTCTAGAAAG	TRUE	Yes	0
chrIV	15636115	15636780	15869736	15871498	7	7	95.1	253.1	1106	TAGGGAC	TAGGGAC	TRUE	Yes	4
chrIV	16244076	16245389	16493221	16495556	19	19	68.1	121.1	1007	CACGGAAAATAGATTGTTA	CACGGAAAATAGATTGTTA	TRUE	Yes	0
chrIV	16244079	16245389	16493224	16495556	58	58	22.6	40.3	1026.6	GAAAAATAGATTGTTACACGGAAAATAGATTGTTACACGGAAAATAGATTGTTACACG	GAAAAATAGATTGTTACACGGAAAATAGATTGTTACACGGAAAATAGATTGTTACACG	TRUE	Yes	0
chrIV	17059728	17062965	17319489	17323914	66	66	49.1	67.1	1188	CAAATTTTTTAAAATTTTAAAGAAAACACAAATCAACCTATTCAGTTGACAATGGTTTTCTTTTAT	CAAATTTTTTAAAATTTTAAAGAAAACACAAATCAACCTATTCAGTTGACAATGGTTTTCTTTTAT	TRUE	Yes	0
chrV	3098864	3099555	3049118	3056677	19	19	35.7	387.7	6688	TCTATTTTTCGTCTGTCAA	TCTATTTTTCGTCTGTCAA	TRUE	Yes	1
chrV	3434552	3441077	3392112	3413502	123	123	53.2	174.2	14883	AACTTCCAACCCAATACCTCTTCTGTAGACAAAAACTCAATTTTTCCTAAACTACAGTAACCCTACCGTATACCTACAGTACTCCTACAGTACCACTACAGTACCTTGACATTATCCATCACC	AACTTCCAACCCAATACCTCTTCTGTAGACAAAAACTCAATTTTTCCTAAACTACAGTAACCCTACCGTATACCTACAGTACTCCTACAGTACCACTACAGTACCTTGACATTATCCATCACC	TRUE	Yes	4
chrV	5073224	5076777	5051846	5065670	26	26	136.9	544.9	10608	ACCATTAGATGAATTTCCAAAGTTAG	ACCATTAGATGAATTTCCAAAGTTAG	TRUE	Yes	26
chrV	5283275	5285860	5272165	5283865	26	26	100.1	457.1	9282	TTTGGTGAACGGCCAGAGTCACTAAT	TTTGGTGAACGGCCAGAGTCACTAAT	TRUE	Yes	17
chrV	5640115	5641569	5638110	5643419	35	35	41.7	151.7	3850	AAAATTTTGGCGGGAAATTCAAATTTTCAGTGAAA	AAAATTTTGGCGGGAAATTCAAATTTTCAGTAAAA	FALSE	Yes	0
chrV	6171654	6176168	6165504	6179481	48	48	94.1	294.4	9614.4	CCTCCTGTTTCAGTTTATCATCCTTCTCCTTTTTCAGTTTAGCATCAG	CCTCCTGTTTCAGTTTATCATCCTTCTCCTTTTTCAGTTTAGCATCAG	TRUE	Yes	28
chrV	6937623	6941156	6955659	6962900	200	200	18	37	3800	TCTACAAGGTATTACTGAAAATTCACTTTTTCTGCTTGAACTTGGCGGTTTCGAAGTTTTTTGAAATTCTGTTTTTAAATTCTGAAAGAACATAAAATTTTCTACAAAATGGCTACGGGAATTTTTGAAAAAGTTAGTTTGAAGCCAGAAATTAATTTTCAAAGTTTGGAAAATCTATTAATTTTGTATATAAATTGTGG	TCTACAAGGTATTACTGAAAATTCACTTTTTCTGCTTGAACTTGGCGGTTTCGAAGTTTTTTGAAATTCTGTTTTTAAATTCTGAAAGAACATAAAATTTTCTACAAAATGGCTACGGGAATTTTTGAAAAAGTTAGTTTGAAGCCAGAAATTAATTTTCAAAGTTTGGAAAATCTATTAATTTTGTATATAAATTGTGG	TRUE	Yes	0
chrV	7719133	7720619	7762001	7764571	35	35	42.8	73.8	1085	AAAATTTGAATTTCCCGCCAAAATTTTTTCACTG	AAAATTTGAATTTCCCGCCAAAATTTTTTCACTG	TRUE	Yes	0
chrV	8328018	8330650	8388016	8392718	69	69	38.2	68.2	2070	GTGGTAGTAGTAGTCTGGACTGGTGTAGTAGAACTGCTTGGAGGTTCTGTACTGGTTGTCTCTGGAGCC	GTGGTAGTAGTAGTCTGGACTGGTGTAGTAGAACTGCTTGGAGGTTCTGTACTGGTTGTCTCTGGAGCC	TRUE	Yes	0
chrV	8699328	8702939	8761483	8777144	60	60	60.1	261.1	12060	GTGGTGCTTGAGGAGCTGGATTCAGTTGAGCTCGTTATGTCGGTTGAAGACACAATTGGA	GTGGTGCTTGAGGAGCTGGATTCAGTTGAGCTCGTTATGTCGGTTGAAGACACAATTGGA	TRUE	Partially	27
chrV	10605675	10612471	10655040	10675597	39	39	174.3	528.3	13806	GGCCACCAGAAATACCAGTTTATGAAAAAGTGGCTCTAG	GGCCACCAGAAATACCAGTTTATGAAAAAGTGGCTCTAG	TRUE	No	NA
chrV	11273750	11274524	11342033	11345912	45	45	17.2	86.2	3105	CACCTACAACTGAATCAACTGCAGCACCAAGCACATCTACAGAGA	CACCTACAACTGAATCAACTGCAGCACCAAGCACATCTACAGAGA	TRUE	Yes	0
chrV	12509962	12510415	12584489	12601042	9	9	50.2	1872.2	16398	TAGTCTAGG	TAGTCTAGG	TRUE	Yes	6
chrV	13640202	13645863	13735934	13740448	16	16	355	283	-1152	GGAAAAATTTTGCTGC	GGAAAAATTTTGCTGC	TRUE	Yes	0
chrV	13882388	13882730	13979516	13981885	70	35	4.9	67.7	2026.5	AAAATTTTGGCGGGAAATTCAAATTTTCAGTGAAA AAAATTTTGGCGGGAAATTCAAATTTTCAGTAAAA	AAAATTTTGGCGGGAAATTCAAATTTTCAGTGAAA	FALSE	Yes	0
chrV	15320758	15321356	15441107	15445864	40	40	15	119	4160	TTTTCTCGATTTTTCTAGAAAGTTCTGGAACATTCCAGAA	TTTTCTCGATTTTTCTAGAAAGTTCTGGAACATTCCAGAA	TRUE	Yes	0
chrV	17308567	17311614	17487761	17516101	246	246	13	122	26814	GGTACTGTAGGATTACGGTAGGATTACTGTAGTTTGAGGAAAAACACATTTTCGTTGTTTGGAGAGATAGTGGGTTGGGGTTAGTGGATGGATGTTGTCGGGGTACTGTAATAGTACTGTAGAGGTACTGTAGGATTACGGTAGGATTACTGTAGTTTGAGGAAAAACACATTTTCGTTGTTTGGAGAGATAGTGGGTTGGGGTTAGTGGATGGATGTTGTCGGGGTACTGTAATAGTACTGTAGA	GGTACTGTAGGATTACGGTAGGATTACTGTAGTTTGAGGAAAAACACATTTTCGTTGTTTGGAGAGATAGTGGGTTGGGGTTAGTGGATGGATGTTGTCGGGGTACTGTAATAGTACTGTAGAGGTACTGTAGGATTACGGTAGGATTACTGTAGTTTGAGGAAAAACACATTTTCGTTGTTTGGAGAGATAGTGGGTTGGGGTTAGTGGATGGATGTTGTCGGGGTACTGTAATAGTACTGTAGA	TRUE	Yes	110
chrV	17384189	17394323	17588678	17608486	59	59	171.3	335.3	9676	GTTTTCAAAATTTTTAAAACCGAGAATTATGGTGAATATGGAAATTCAAATGTGCACTG	GTTTTCAAAATTTTTAAAACCGAGAATTATGGTGAATATGGAAATTCAAATGTGCACTG	TRUE	Yes	51
chrV	18169354	18171289	18406776	18410367	31	31	62	115	1643	AAATTCAAATTTTCAGTCAATTTTTGGCGGG	AAATTCAAATTTTCAGTCAATTTTTGGCGGG	TRUE	Yes	0
chrV	18174481	18176714	18413559	18417143	57	57	39.2	62.9	1350.9	CCTTGACGCAATTATCGTGCCTTGACGCAATTCTAGTGCCTTGGAGCAATTCTAGTT	CCTTGACGCAATTATCGTGCCTTGACGCAATTCTAGTGCCTTGGAGCAATTCTAGTT	TRUE	Yes	0
chrV	18400317	18401789	18642191	18655979	20	20	74.4	697.5	12462	AATAGATTGTTACACGAAAA	AATAGATTGTTACACGAAAA	TRUE	Yes	145
chrV	18679663	18683877	18938047	18943851	18	18	241.5	329.5	1584	ATTTCAAAATTCCAAAAA	ATTTCAAAATTCCAAAAA	TRUE	Yes	0
chrV	18882520	18883802	19165078	19167643	17	17	73.9	147.9	1258	TTAGCAGCGCCCAAAAA	TTAGCAGCGCCCAAAAA	TRUE	Yes	0
chrV	18979815	18980467	19264891	19266632	18	18	36.9	98.9	1116	TTTTGGGCGCTGCTAATT	TTTTGGGCGCTGCTAATT	TRUE	Yes	1
chrV	19193852	19195192	19480246	19483655	18	18	74.8	189.8	2070	CGCTGCTAATTTTTTGGT	CGCTGCTAATTTTTTGGT	TRUE	Yes	0
chrV	19364152	19367203	19652910	19660543	32	32	95.3	239.3	4608	CCGCTAAAAAATATATGAAAAATTCAAATTTC	CCGCTAAAAAATATATGAAAAATTCAAATTTC	TRUE	Yes	0
chrV	19753275	19753612	20061414	20063415	16	16	21.1	125.1	1664	CCTTAGATCTCAATTC	CCTTAGATCTCAATTC	TRUE	Yes	0
chrX	1	262	1	2668	6	6	43.7	444.7	2406	CTAAGC	CTAAGC	TRUE	Partially	3
chrX	289827	291959	309556	317004	119	119	17.9	62.6	5319.3	GTCGCGGATTTTCTCGGCCACCGTTGCATATTTCGCAATAATTTTTACGGGAACGTAATCTCCACGTCACCAGCTTTCATTTAAGTACCCACACGGCAAGGTTTAATTTTTGAAATTTG	GTCGCGGATTTTCTCGGCCACCGTTGCATATTTCGCAATAATTTTTACGGGAACGTAATCTCCACGTCACCAGCTTTCATTTAAGTACCCACACGGCAAGGTTTAATTTTTGAAATTTG	TRUE	Yes	2
chrX	291966	295296	317599	334534	172	172	19.2	98.2	13588	TTTTTCGGGTTTTTTGAAATGAATATCGTAGCTACAGAAACGGTAGTACACTCTTCTGAAAATACAAAAAATTTGCAATTTTTATAGCTAGGACACTTTTTGTCTGCCCAAATATAAGCAACCAAAAATAATTTCCAAGTTTTTGATGATTTGTTGCATATTGAAAAAAACA	TTTTTCGGGTTTTTTGAAATGAATATCGTAGCTACAGAAACGGTAGTACACTCTTCTGAAAATACAAAAAATTTGCAATTTTTATAGCTAGGACACTTTTTGTCTGCCCAAATATAAGCAACCAAAAATAATTTCCAAGTTTTTGATGATTTGTTGCATATTGAAAAAAACA	TRUE	Yes	3
chrX	1636126	1638574	1682598	1693172	26	26	94.2	407.2	8138	ACGGTCAGAGTCACTATTTTTGGTGA	ACGGTCAGAGTCACTATTTTTGGTGA	TRUE	Yes	8
chrX	2004046	2004696	2097783	2102474	19	19	32.4	236.4	3876	ATATTTATTTATTTAATTA	ATATTTATTTATTTAATTA	TRUE	Yes	1
chrX	2010875	2011349	2108916	2110641	4	4	116	433	1268	AATA	AATA	TRUE	Yes	2
chrX	2057835	2058418	2157129	2162509	40	40	14.6	134.6	4800	TTCCAGAATTTTCTCGATTTTTCTAGAAAGTTCTGGAACA	TTCCAGAATTTTCTCGATTTTTCTAGAAAGTTCTGGAACA	TRUE	Yes	6
chrX	2993215	2995173	3099745	3103269	168	168	11.2	20.2	1512	ACAAAAACGTACCAATAATACTAAAAAAAAAAATAGCAATCCATTTTCATAAAAATTCTCCCAAAATTCCAAAATTTTTATTTTGTTTTTTTGCGCCAGTCATATGTATGTAAAAAAATGAATTCAAGACAAAAACCCCTGTAGCGCGGCTGAAAATTGATATCATGGT	ACAAAAACGTACCAATAATACTAAAAAAAAAAATAGCAATCCATTTTCATAAAAATTCTCCCAAAATTCCAAAATTTTTATTTTGTTTTTTTGCGCCAGTCATATGTATGTAAAAAAATGAATTCAAGACAAAAACCCCTGTAGCGCGGCTGAAAATTGATATCATGGT	TRUE	Yes	0
chrX	3007203	3008033	3115301	3123080	19	19	43.6	409.6	6954	TTTTCGTGTAACAATCTAT	TTTTCGTGTAACAATCTAT	TRUE	Yes	15
chrX	3073735	3075465	3188773	3189306	35	35	49.7	15.3	-1204	GAAAATTTGAATTTCCCGCCAAAATTTTTTCACT	GAAAATTTGAATTTCCCGCCAAAATTTTTTCACT	TRUE	Yes	1
chrX	3631381	3631902	3747624	3752414	11	11	46.9	430.9	4224	CAGTTGTCACC	CAGTTGTCACC	TRUE	Yes	0
chrX	7077482	7079222	7306206	7313838	20	20	87.2	385.2	5960	ATAGCTATGTCGTGTCGTTT	ATAGCTATGTCGTGTCGTTT	TRUE	Yes	15
chrX	7351395	7361375	7586210	7592860	40	40	249.6	166.6	-3320	CGCCGGTTTCGCTTTGAGCGATTCCTTACCCTTAAATGGG	CGCCGGTTTCGCTTTGAGCGATTCCTTACCCTTAAATGGG	TRUE	Yes	1
chrX	9184903	9188713	9421574	9442113	25	25	152.1	821.3	16730	CTGTGAAGCCAGAGAGTAAAATATA	CTGTGAAGCCAGAGAGTAAAATATA	TRUE	Yes	16
chrX	10361175	10369118	10621574	10641106	25	25	317.2	784.2	11675	CAGAGAGTAAAATATGTGGTGAAGC	CAGAGAGTAAAATATGTGGTGAAGC	TRUE	Partially	155
chrX	11440988	11442715	11722466	11725793	25	25	69.1	133.1	1600	CCGTAATGCCAATTTATAGAATCTG	CCGTAATGCCAATTTATAGAATCTG	TRUE	Yes	0
chrX	11442714	11443749	11725792	11730349	26	26	39.9	175.9	3536	CGGCGGATTTTAGAAAAATGGCATTG	CGGCGGATTTTAGAAAAATGGCATTG	TRUE	Yes	0
chrX	11785678	11787460	12072285	12079665	26	26	68.6	283.6	5590	AACCATTCACCTAAAATAATGACTCT	AACCATTCACCTAAAATAATGACTCT	TRUE	Yes	7
chrX	14908078	14909367	15253034	15270757	25	25	51.6	706.6	16375	TTCACAATATATTTTACTCTCTGGC	TTCACAATATATTTTACTCTCTGGC	TRUE	Yes	38
chrX	15226813	15228885	15588435	15598283	108	108	19.2	91.2	7776	AAGTCTTCTTGATTCTGAGTTCTTGCTTCGAACTGTTGACCATCTCCTTGCAGGATCTTATTGTCAGATGGAACCTTCTTGGCATACCGTTCTCCACTGATGTGAGTG	AAGTCTTCTTGATTCTGAGTTCTTGCTTCGAACTGTTGACCATCTCCTTGCAGGATCTTATTGTCAGATGGAACCTTCTTGGCATACCGTTCTCCACTGATGTGAGTG	TRUE	Yes	1
chrX	16758232	16761616	17129965	17135096	76	76	44.7	67.7	1748	CACCACAGTCTCTCCCACTTTCCTTCGTGCAAAGGAGTGTCTTCTAGCATTAGAGCATGTACACAGACACCGACAA	CACCACAGTCTCTCCCACTTTCCTTCGTGCAAAGGAGTGTCTTCTAGCATTAGAGCATGTACACAGACACCGACAA	TRUE	Yes	0
chrX	16931712	16940261	17305189	17316218	151	151	56.1	73.1	2567	TAGGAAACTATCTCAATAACTAAGATCGTGTTAAACTCTCAAATCAATCCAAACTTTAAATATAAAAATTCTAAGACTGTACCATTCTCTCCAATCAAAACCTCATGTCAAACTCTCAACCAAAATTCTAAATACCAAAATCCAAATCGCG	TAGGAAACTATCTCAATAACTAAGATCGTGTTAAACTCTCAAATCAATCCAAACTTTAAATATAAAAATTCTAAGACTGTACCATTCTCTCCAATCAAAACCTCATGTCAAACTCTCAACCAAAATTCTAAATACCAAAATCCAAATCGCG	TRUE	Yes	1
chrX	17311445	17311775	17687246	17689976	40	40	8.3	68.3	2400	AGAAAATTCTGAAATGTTCCAGAACTTTCTAGAAAAATCG	AGAAAATTCTGAAATGTTCCAGAACTTTCTAGAAAAATCG	TRUE	Yes	0
chrX	17441669	17447725	17820401	17822142	45	45	135	38.7	-4333.5	AGTACGACAGAAAGCACTTCGACTCCATCCACCAGCACTGCTTCG	AGTACGACAGAAAGCACTTCGACTCCATCCACCAGCACTGCTTCG	TRUE	Partially	15
								Total of difference (nt)	595241
