# Supplementary material for: Recompleting the Caenorhabditis elegans genome
Source: HighWire-hosted journal article supplement (doi:10.1101/gr.244830.118), 2019-05-23
Supplement: Supplemental_Table_S10.xlsx [file Supplemental_Table_S10.xlsx]

## Sheet: Summary
	Initial YACs
		YAC count
	Used in N2	536
	Mappable to VC2010	494 (92.2%)
	Unmappable to VC2010	42 (7.8%)
	YAC fraction of VC2010 genome
		Size
	Full genome	102,092,263 nt (100.0%)
	Covered by N2 YACs	22,649,103 nt (22.2%)
	YAC fraction of TREs in VC2010
		TRE count	Size
	All TREs	114 (100%)	1,257,512 nt (100.0%)
	TREs within YACs	56 (49.1%)	511,501 nt (40.7%)
	Fisher's exact test for overrepresentation of TREs in YACs
	R function used:	binom.test(56,114,p=0.221849357967508,alternative=c("two.sided"),conf.level=0.99)
	Result:	p = 2.581e-10
	Fisher's exact text for overrepresentation of TRE nucleotides in YACs
	R function used:	binom.test(511501,1257512,p=0.221849357967508,alternative=c("two.sided"),conf.level=0.99)
	Result:	p < 2.2e-16

## Sheet: YACs_in_N2.gff3
##gff-version 3
I	Genomic_canonical	assembly_component	61	47689	.	+	.	Name=Y74C9A;Note=Clone:Y74C9A,GenBank:FO080986
I	Genomic_canonical	assembly_component	47490	107880	.	+	.	Name=Y48G1C;Note=Clone:Y48G1C,GenBank:FO081457
I	Genomic_canonical	assembly_component	202769	222662	.	+	.	Name=Y48G1BL;Note=Clone:Y48G1BL,GenBank:FO081620
I	Genomic_canonical	assembly_component	222463	257491	.	+	.	Name=Y48G1BM;Note=Clone:Y48G1BM,GenBank:FO081799
I	Genomic_canonical	assembly_component	257292	260045	.	+	.	Name=Y48G1BR;Note=Clone:Y48G1BR,GenBank:FO081733
I	Genomic_canonical	assembly_component	314411	357504	.	+	.	Name=Y48G1A;Note=Clone:Y48G1A,GenBank:FO080938
I	Genomic_canonical	assembly_component	395981	420723	.	+	.	Name=Y50C1A;Note=Clone:Y50C1A,GenBank:FO080420
I	Genomic_canonical	assembly_component	493989	532971	.	+	.	Name=Y65B4BL;Note=Clone:Y65B4BL,GenBank:FO081771
I	Genomic_canonical	assembly_component	531872	534604	.	+	.	Name=Y65B4BM;Note=Clone:Y65B4BM,GenBank:FO081817
I	Genomic_canonical	assembly_component	534405	578641	.	+	.	Name=Y65B4BR;Note=Clone:Y65B4BR,GenBank:FO081483
I	Genomic_canonical	assembly_component	619241	670490	.	+	.	Name=Y65B4A;Note=Clone:Y65B4A,GenBank:FO081482
I	Genomic_canonical	assembly_component	670491	760475	.	+	.	Name=Y18H1A;Note=Clone:Y18H1A,GenBank:FO081715
I	Genomic_canonical	assembly_component	791629	807698	.	+	.	Name=Y73A3A;Note=Clone:Y73A3A,GenBank:FO081714
I	Genomic_canonical	assembly_component	844591	949560	.	+	.	Name=Y95B8A;Note=Clone:Y95B8A,GenBank:FO081787
I	Genomic_canonical	assembly_component	948361	957410	.	+	.	Name=Y34D9B;Note=Clone:Y34D9B,GenBank:FO081461
I	Genomic_canonical	assembly_component	1018125	1067431	.	+	.	Name=Y34D9A;Note=Clone:Y34D9A,GenBank:FO080952
I	Genomic_canonical	assembly_component	1132509	1258529	.	+	.	Name=Y48G8AL;Note=Clone:Y48G8AL,GenBank:FO081800
I	Genomic_canonical	assembly_component	1255030	1302004	.	+	.	Name=Y48G8AR;Note=Clone:Y48G8AR,GenBank:FO081633
I	Genomic_canonical	assembly_component	1342084	1386493	.	+	.	Name=Y92H12BL;Note=Clone:Y92H12BL,GenBank:FO081632
I	Genomic_canonical	assembly_component	1386294	1391877	.	+	.	Name=Y92H12BM;Note=Clone:Y92H12BM,GenBank:FO081828
I	Genomic_canonical	assembly_component	1391678	1441300	.	+	.	Name=Y92H12BR;Note=Clone:Y92H12BR,GenBank:FO081323
I	Genomic_canonical	assembly_component	1489061	1580880	.	+	.	Name=Y92H12A;Note=Clone:Y92H12A,GenBank:FO081415
I	Genomic_canonical	assembly_component	1580681	1644427	.	+	.	Name=Y73E7A;Note=Clone:Y73E7A,GenBank:FO081821
I	Genomic_canonical	assembly_component	1640428	1832381	.	+	.	Name=Y71G12B;Note=Clone:Y71G12B,GenBank:FO080942
I	Genomic_canonical	assembly_component	1873564	1912530	.	+	.	Name=Y71G12A;Note=Clone:Y71G12A,GenBank:FO081637
I	Genomic_canonical	assembly_component	1911731	2000978	.	+	.	Name=Y51F10;Note=Clone:Y51F10,GenBank:FO081782
I	Genomic_canonical	assembly_component	2000779	2059299	.	+	.	Name=Y20F4;Note=Clone:Y20F4,GenBank:FO081781
I	Genomic_canonical	assembly_component	2059100	2166035	.	+	.	Name=Y37E3;Note=Clone:Y37E3,GenBank:FO081769
I	Genomic_canonical	assembly_component	2268594	2291728	.	+	.	Name=Y39G10AL;Note=Clone:Y39G10AL,GenBank:FO081124
I	Genomic_canonical	assembly_component	2281729	2414286	.	+	.	Name=Y39G10AR;Note=Clone:Y39G10AR,GenBank:FO081209
I	Genomic_canonical	assembly_component	2463881	2476965	.	+	.	Name=Y74C10AL;Note=Clone:Y74C10AL,GenBank:FO081734
I	Genomic_canonical	assembly_component	2473266	2481333	.	+	.	Name=Y74C10AM;Note=Clone:Y74C10AM,GenBank:FO081824
I	Genomic_canonical	assembly_component	2481134	2489792	.	+	.	Name=Y74C10AR;Note=Clone:Y74C10AR,GenBank:FO081786
I	Genomic_canonical	assembly_component	2488793	2558455	.	+	.	Name=Y23H5B;Note=Clone:Y23H5B,GenBank:FO080963
I	Genomic_canonical	assembly_component	2606694	2636264	.	+	.	Name=Y23H5A;Note=Clone:Y23H5A,GenBank:FO081344
I	Genomic_canonical	assembly_component	2701592	2784888	.	+	.	Name=Y71F9B;Note=Clone:Y71F9B,GenBank:FO081276
I	Genomic_canonical	assembly_component	2859961	2928105	.	+	.	Name=Y71F9AL;Note=Clone:Y71F9AL,GenBank:FO081777
I	Genomic_canonical	assembly_component	2927106	2947390	.	+	.	Name=Y71F9AM;Note=Clone:Y71F9AM,GenBank:FO081820
I	Genomic_canonical	assembly_component	2945191	2995958	.	+	.	Name=Y71F9AR;Note=Clone:Y71F9AR,GenBank:FO081805
I	Genomic_canonical	assembly_component	2988259	3015116	.	+	.	Name=Y54E10BL;Note=Clone:Y54E10BL,GenBank:FO081804
I	Genomic_canonical	assembly_component	3014917	3069391	.	+	.	Name=Y54E10BR;Note=Clone:Y54E10BR,GenBank:FO081636
I	Genomic_canonical	assembly_component	3159591	3261230	.	+	.	Name=Y54E10A;Note=Clone:Y54E10A,GenBank:FO081614
I	Genomic_canonical	assembly_component	3261031	3266947	.	+	.	Name=Y44E3B;Note=Clone:Y44E3B,GenBank:FO081761
I	Genomic_canonical	assembly_component	3302147	3350634	.	+	.	Name=Y44E3A;Note=Clone:Y44E3A,GenBank:FO081760
I	Genomic_canonical	assembly_component	3432595	3626915	.	+	.	Name=Y47G6A;Note=Clone:Y47G6A,GenBank:FO081580
I	Genomic_canonical	assembly_component	3745650	3753970	.	+	.	Name=Y8G1A;Note=Clone:Y8G1A,GenBank:FO081730
I	Genomic_canonical	assembly_component	4272100	4310182	.	+	.	Name=Y47D9A;Note=Clone:Y47D9A,GenBank:FO080843
I	Genomic_canonical	assembly_component	4463696	4464750	.	+	.	Name=Y119C1C;Note=Clone:Y119C1C,GenBank:FO080837
I	Genomic_canonical	assembly_component	4503087	4559858	.	+	.	Name=Y119C1B;Note=Clone:Y119C1B,GenBank:FO080992
I	Genomic_canonical	assembly_component	4640580	4643337	.	+	.	Name=Y119C1A;Note=Clone:Y119C1A,GenBank:FO080108
I	Genomic_canonical	assembly_component	5100636	5171329	.	+	.	Name=Y110A7A;Note=Clone:Y110A7A,GenBank:FO080728
I	Genomic_canonical	assembly_component	5906619	5935398	.	+	.	Name=Y76G2B;Note=Clone:Y76G2B,GenBank:FO080117
I	Genomic_canonical	assembly_component	5974833	5980296	.	+	.	Name=Y76G2A;Note=Clone:Y76G2A,GenBank:FO080116
I	Genomic_canonical	assembly_component	8758329	8801062	.	+	.	Name=DY3;Note=Clone:DY3,GenBank:Z96047
I	Genomic_canonical	assembly_component	9619571	9620269	.	+	.	Name=Y21F11A;Note=Clone:Y21F11A,GenBank:AL023833
I	Genomic_canonical	assembly_component	9815412	9842596	.	+	.	Name=Y67A6A;Note=Clone:Y67A6A,GenBank:AL032645
I	Genomic_canonical	assembly_component	9931433	9943448	.	+	.	Name=Y106G6A;Note=Clone:Y106G6A,GenBank:AL032633
I	Genomic_canonical	assembly_component	9997328	9999421	.	+	.	Name=Y106G6B;Note=Clone:Y106G6B,GenBank:AL023824
I	Genomic_canonical	assembly_component	10053401	10066799	.	+	.	Name=Y106G6C;Note=Clone:Y106G6C,GenBank:AL023823
I	Genomic_canonical	assembly_component	10106931	10142486	.	+	.	Name=Y106G6D;Note=Clone:Y106G6D,GenBank:AL031629
I	Genomic_canonical	assembly_component	10199700	10237403	.	+	.	Name=Y106G6E;Note=Clone:Y106G6E,GenBank:AL032656
I	Genomic_canonical	assembly_component	10271514	10272136	.	+	.	Name=Y106G6F;Note=Clone:Y106G6F,GenBank:AL032619
I	Genomic_canonical	assembly_component	10309036	10329279	.	+	.	Name=Y106G6G;Note=Clone:Y106G6G,GenBank:AL033508
I	Genomic_canonical	assembly_component	10427158	10475769	.	+	.	Name=Y106G6H;Note=Clone:Y106G6H,GenBank:AL032631
I	Genomic_canonical	assembly_component	10848900	10873982	.	+	.	Name=Y37F4;Note=Clone:Y37F4,GenBank:FO080792
I	Genomic_canonical	assembly_component	10940616	10962343	.	+	.	Name=Y95D11A;Note=Clone:Y95D11A,GenBank:AL132852
I	Genomic_canonical	assembly_component	10962237	11069185	.	+	.	Name=Y52B11A;Note=Clone:Y52B11A,GenBank:AL032654
I	Genomic_canonical	assembly_component	11101201	11126577	.	+	.	Name=Y52B11B;Note=Clone:Y52B11B,GenBank:AL032638
I	Genomic_canonical	assembly_component	11162469	11170456	.	+	.	Name=Y52B11C;Note=Clone:Y52B11C,GenBank:AL023846
I	Genomic_canonical	assembly_component	11207838	11235800	.	+	.	Name=Y53H1A;Note=Clone:Y53H1A,GenBank:AL132864
I	Genomic_canonical	assembly_component	11292868	11305843	.	+	.	Name=Y53H1B;Note=Clone:Y53H1B,GenBank:AL132851
I	Genomic_canonical	assembly_component	11383315	11420319	.	+	.	Name=Y53H1C;Note=Clone:Y53H1C,GenBank:AL117201
I	Genomic_canonical	assembly_component	11624273	11629386	.	+	.	Name=Y47H9A;Note=Clone:Y47H9A,GenBank:AL031636
I	Genomic_canonical	assembly_component	11743901	11750338	.	+	.	Name=Y47H9B;Note=Clone:Y47H9B,GenBank:AL031637
I	Genomic_canonical	assembly_component	11830768	11906109	.	+	.	Name=Y47H9C;Note=Clone:Y47H9C,GenBank:AL032657
I	Genomic_canonical	assembly_component	11952322	12030474	.	+	.	Name=Y53C10A;Note=Clone:Y53C10A,GenBank:AL033536
I	Genomic_canonical	assembly_component	12071565	12103085	.	+	.	Name=Y47H10A;Note=Clone:Y47H10A,GenBank:AL132848
I	Genomic_canonical	assembly_component	12464845	12470298	.	+	.	Name=Y91F4A;Note=Clone:Y91F4A,GenBank:AL032664
I	Genomic_canonical	assembly_component	12780291	12933169	.	+	.	Name=Y18D10A;Note=Clone:Y18D10A,GenBank:AL034393
I	Genomic_canonical	assembly_component	13058985	13102364	.	+	.	Name=Y26D4A;Note=Clone:Y26D4A,GenBank:AL110478
I	Genomic_canonical	assembly_component	13343852	13371905	.	+	.	Name=Y40B1A;Note=Clone:Y40B1A,GenBank:AL034392
I	Genomic_canonical	assembly_component	13421407	13450719	.	+	.	Name=Y40B1B;Note=Clone:Y40B1B,GenBank:AL032636
I	Genomic_canonical	assembly_component	13450610	13490898	.	+	.	Name=Y48G10A;Note=Clone:Y48G10A,GenBank:AL132847
I	Genomic_canonical	assembly_component	13490784	13613874	.	+	.	Name=Y87G2A;Note=Clone:Y87G2A,GenBank:AL110500
I	Genomic_canonical	assembly_component	13613770	13628243	.	+	.	Name=Y6B3A;Note=Clone:Y6B3A,GenBank:AL032650
I	Genomic_canonical	assembly_component	13700282	13769990	.	+	.	Name=Y6B3B;Note=Clone:Y6B3B,GenBank:AL032655
I	Genomic_canonical	assembly_component	13769883	13798050	.	+	.	Name=Y37H9A;Note=Clone:Y37H9A,GenBank:AL032625
I	Genomic_canonical	assembly_component	13797947	13799594	.	+	.	Name=Y71A12A;Note=Clone:Y71A12A,GenBank:AL023854
I	Genomic_canonical	assembly_component	13868558	14005741	.	+	.	Name=Y71A12B;Note=Clone:Y71A12B,GenBank:AL132902
I	Genomic_canonical	assembly_component	14041370	14048815	.	+	.	Name=Y71A12C;Note=Clone:Y71A12C,GenBank:AL023853
I	Genomic_canonical	assembly_component	14083000	14116898	.	+	.	Name=Y63D3A;Note=Clone:Y63D3A,GenBank:AL032652
I	Genomic_canonical	assembly_component	14333161	14610766	.	+	.	Name=Y105E8A;Note=Clone:Y105E8A,GenBank:AL132876
I	Genomic_canonical	assembly_component	14610663	14689934	.	+	.	Name=Y105E8B;Note=Clone:Y105E8B,GenBank:AL132877
I	Genomic_canonical	assembly_component	14689830	14717603	.	+	.	Name=Y54E5A;Note=Clone:Y54E5A,GenBank:AL032643
I	Genomic_canonical	assembly_component	14804607	14825959	.	+	.	Name=Y54E5B;Note=Clone:Y54E5B,GenBank:AL032653
II	Genomic_canonical	assembly_component	222102	256434	.	+	.	Name=Y43H11AL;Note=Clone:Y43H11AL,GenBank:FO081418
II	Genomic_canonical	assembly_component	256235	259060	.	+	.	Name=Y43H11AR;Note=Clone:Y43H11AR,GenBank:FO080205
II	Genomic_canonical	assembly_component	538894	542640	.	+	.	Name=Y64C7A;Note=Clone:Y64C7A,GenBank:FO080469
II	Genomic_canonical	assembly_component	674291	678932	.	+	.	Name=Y39F10C;Note=Clone:Y39F10C,GenBank:FO081603
II	Genomic_canonical	assembly_component	712687	735308	.	+	.	Name=Y39F10B;Note=Clone:Y39F10B,GenBank:FO080443
II	Genomic_canonical	assembly_component	774959	785925	.	+	.	Name=Y39F10A;Note=Clone:Y39F10A,GenBank:FO080442
II	Genomic_canonical	assembly_component	850281	872662	.	+	.	Name=Y46B2A;Note=Clone:Y46B2A,GenBank:FO081237
II	Genomic_canonical	assembly_component	1181159	1213091	.	+	.	Name=Y50F7A;Note=Clone:Y50F7A,GenBank:FO081450
II	Genomic_canonical	assembly_component	1265879	1310193	.	+	.	Name=Y57G7A;Note=Clone:Y57G7A,GenBank:FO081412
II	Genomic_canonical	assembly_component	1360917	1363549	.	+	.	Name=Y51H7D;Note=Clone:Y51H7D,GenBank:FO080519
II	Genomic_canonical	assembly_component	1401244	1469904	.	+	.	Name=Y51H7C;Note=Clone:Y51H7C,GenBank:FO081466
II	Genomic_canonical	assembly_component	1506517	1512938	.	+	.	Name=Y51H7BL;Note=Clone:Y51H7BL,GenBank:FO081554
II	Genomic_canonical	assembly_component	1508939	1517524	.	+	.	Name=Y51H7BM;Note=Clone:Y51H7BM,GenBank:FO081801
II	Genomic_canonical	assembly_component	1516325	1538716	.	+	.	Name=Y51H7BR;Note=Clone:Y51H7BR,GenBank:FO081592
II	Genomic_canonical	assembly_component	1974531	1991749	.	+	.	Name=Y16E11A;Note=Clone:Y16E11A,GenBank:FO080835
II	Genomic_canonical	assembly_component	2200382	2219394	.	+	.	Name=Y59C2A;Note=Clone:Y59C2A,GenBank:FO080755
II	Genomic_canonical	assembly_component	2557987	2569262	.	+	.	Name=Y47G7C;Note=Clone:Y47G7C,GenBank:FO081098
II	Genomic_canonical	assembly_component	2696920	2708732	.	+	.	Name=Y47G7B;Note=Clone:Y47G7B,GenBank:FO081285
II	Genomic_canonical	assembly_component	2740278	2747605	.	+	.	Name=Y47G7A;Note=Clone:Y47G7A,GenBank:FO081254
II	Genomic_canonical	assembly_component	2797473	2798307	.	+	.	Name=Y110A2B;Note=Clone:Y110A2B,GenBank:FO081087
II	Genomic_canonical	assembly_component	2836458	2895779	.	+	.	Name=Y110A2AL;Note=Clone:Y110A2AL,GenBank:FO081635
II	Genomic_canonical	assembly_component	2895580	2908359	.	+	.	Name=Y110A2AM;Note=Clone:Y110A2AM,GenBank:FO081830
II	Genomic_canonical	assembly_component	2906460	2920833	.	+	.	Name=Y110A2AR;Note=Clone:Y110A2AR,GenBank:FO081831
II	Genomic_canonical	assembly_component	3058152	3116904	.	+	.	Name=Y25C1A;Note=Clone:Y25C1A,GenBank:FO080207
II	Genomic_canonical	assembly_component	3153904	3196947	.	+	.	Name=Y27F2A;Note=Clone:Y27F2A,GenBank:FO081726
II	Genomic_canonical	assembly_component	3319588	3327198	.	+	.	Name=Y46D2A;Note=Clone:Y46D2A,GenBank:FO081149
II	Genomic_canonical	assembly_component	3361987	3381552	.	+	.	Name=Y49F6C;Note=Clone:Y49F6C,GenBank:FO081148
II	Genomic_canonical	assembly_component	3465800	3517938	.	+	.	Name=Y49F6B;Note=Clone:Y49F6B,GenBank:FO080566
II	Genomic_canonical	assembly_component	3586850	3611179	.	+	.	Name=Y49F6A;Note=Clone:Y49F6A,GenBank:FO081346
II	Genomic_canonical	assembly_component	3788107	3803770	.	+	.	Name=Y8A9A;Note=Clone:Y8A9A,GenBank:FO081463
II	Genomic_canonical	assembly_component	3925650	3938496	.	+	.	Name=Y14H12B;Note=Clone:Y14H12B,GenBank:FO081452
II	Genomic_canonical	assembly_component	3988074	4015795	.	+	.	Name=Y14H12A;Note=Clone:Y14H12A,GenBank:FO081601
II	Genomic_canonical	assembly_component	4049080	4056008	.	+	.	Name=Y54C5B;Note=Clone:Y54C5B,GenBank:FO081600
II	Genomic_canonical	assembly_component	4134570	4141488	.	+	.	Name=Y54C5A;Note=Clone:Y54C5A,GenBank:FO081490
II	Genomic_canonical	assembly_component	4305169	4322610	.	+	.	Name=Y52E8A;Note=Clone:Y52E8A,GenBank:FO080259
II	Genomic_canonical	assembly_component	4637967	4653217	.	+	.	Name=Y74E4A;Note=Clone:Y74E4A,GenBank:FO081294
II	Genomic_canonical	assembly_component	4949805	4960780	.	+	.	Name=Y38A8;Note=Clone:Y38A8,GenBank:FO081756
II	Genomic_canonical	assembly_component	7444407	7452500	.	+	.	Name=Y9D1A;Note=Clone:Y9D1A,GenBank:FO080996
II	Genomic_canonical	assembly_component	8285786	8294017	.	+	.	Name=Y1E3A;Note=Clone:Y1E3A,GenBank:AL023831
II	Genomic_canonical	assembly_component	9142756	9148790	.	+	.	Name=Y9C2UA;Note=Clone:Y9C2UA,GenBank:AL008881
II	Genomic_canonical	assembly_component	9393784	9410190	.	+	.	Name=Y51B9A;Note=Clone:Y51B9A,GenBank:AL023845
II	Genomic_canonical	assembly_component	9691886	9718714	.	+	.	Name=Y53C12A;Note=Clone:Y53C12A,GenBank:Z99277
II	Genomic_canonical	assembly_component	9718598	9720093	.	+	.	Name=Y53C12D;Note=Clone:Y53C12D,GenBank:AL033123
II	Genomic_canonical	assembly_component	9719987	9753392	.	+	.	Name=Y53C12B;Note=Clone:Y53C12B,GenBank:Z99278
II	Genomic_canonical	assembly_component	9806777	9830383	.	+	.	Name=Y53C12C;Note=Clone:Y53C12C,GenBank:Z95623
II	Genomic_canonical	assembly_component	10919238	10924513	.	+	.	Name=Y19D2B;Note=Clone:Y19D2B,GenBank:AL023832
II	Genomic_canonical	assembly_component	11520769	11540170	.	+	.	Name=Y62F5A;Note=Clone:Y62F5A,GenBank:AL110499
II	Genomic_canonical	assembly_component	11815899	11829226	.	+	.	Name=Y6D1A;Note=Clone:Y6D1A,GenBank:AL032651
II	Genomic_canonical	assembly_component	11915784	11916113	.	+	.	Name=Y38G4A;Note=Clone:Y38G4A,GenBank:AL021179
II	Genomic_canonical	assembly_component	11916008	11929516	.	+	.	Name=Y17G7A;Note=Clone:Y17G7A,GenBank:AL021172
II	Genomic_canonical	assembly_component	11968793	12111884	.	+	.	Name=Y17G7B;Note=Clone:Y17G7B,GenBank:AL023828
II	Genomic_canonical	assembly_component	12111785	12136470	.	+	.	Name=Y43F11A;Note=Clone:Y43F11A,GenBank:AL117199
II	Genomic_canonical	assembly_component	12136371	12301709	.	+	.	Name=Y57A10A;Note=Clone:Y57A10A,GenBank:AL117195
II	Genomic_canonical	assembly_component	12355357	12396921	.	+	.	Name=Y57A10B;Note=Clone:Y57A10B,GenBank:AL032647
II	Genomic_canonical	assembly_component	12411714	12441884	.	+	.	Name=Y57A10C;Note=Clone:Y57A10C,GenBank:AL023847
II	Genomic_canonical	assembly_component	12569878	12680814	.	+	.	Name=Y38E10A;Note=Clone:Y38E10A,GenBank:AL110484
II	Genomic_canonical	assembly_component	12680715	12878622	.	+	.	Name=Y46G5A;Note=Clone:Y46G5A,GenBank:AL110485
II	Genomic_canonical	assembly_component	12949152	13025321	.	+	.	Name=Y38F1A;Note=Clone:Y38F1A,GenBank:AL032639
II	Genomic_canonical	assembly_component	13079848	13100150	.	+	.	Name=Y81G3A;Note=Clone:Y81G3A,GenBank:AL034543
II	Genomic_canonical	assembly_component	13255535	13420561	.	+	.	Name=Y48C3A;Note=Clone:Y48C3A,GenBank:AL117203
II	Genomic_canonical	assembly_component	13420462	13441423	.	+	.	Name=Y48E1C;Note=Clone:Y48E1C,GenBank:Z93394
II	Genomic_canonical	assembly_component	13524379	13609083	.	+	.	Name=Y48E1B;Note=Clone:Y48E1B,GenBank:Z93393
II	Genomic_canonical	assembly_component	13676475	13694050	.	+	.	Name=Y48E1A;Note=Clone:Y48E1A,GenBank:Z93392
II	Genomic_canonical	assembly_component	13693951	13736090	.	+	.	Name=Y54G9A;Note=Clone:Y54G9A,GenBank:AL032648
II	Genomic_canonical	assembly_component	13856928	13900594	.	+	.	Name=Y51H1A;Note=Clone:Y51H1A,GenBank:AL032644
II	Genomic_canonical	assembly_component	13969436	13995058	.	+	.	Name=Y39G8B;Note=Clone:Y39G8B,GenBank:AL110482
II	Genomic_canonical	assembly_component	14063851	14103903	.	+	.	Name=Y39G8C;Note=Clone:Y39G8C,GenBank:AL032634
II	Genomic_canonical	assembly_component	14150349	14251643	.	+	.	Name=Y48B6A;Note=Clone:Y48B6A,GenBank:AL110490
II	Genomic_canonical	assembly_component	14251538	14350953	.	+	.	Name=Y54G11A;Note=Clone:Y54G11A,GenBank:AL034488
II	Genomic_canonical	assembly_component	14454667	14464491	.	+	.	Name=Y54G11B;Note=Clone:Y54G11B,GenBank:AL021181
II	Genomic_canonical	assembly_component	14738092	14800707	.	+	.	Name=Y54E2A;Note=Clone:Y54E2A,GenBank:AL032646
II	Genomic_canonical	assembly_component	14871160	14895195	.	+	.	Name=Y53F4A;Note=Clone:Y53F4A,GenBank:AL110494
II	Genomic_canonical	assembly_component	14951149	15178754	.	+	.	Name=Y53F4B;Note=Clone:Y53F4B,GenBank:AL132949
II	Genomic_canonical	assembly_component	15178339	15189100	.	+	.	Name=Y1H11;Note=Clone:Y1H11,GenBank:FO081778
II	Genomic_canonical	assembly_component	15188901	15208467	.	+	.	Name=Y46E12BR;Note=Clone:Y46E12BR,GenBank:FO081779
II	Genomic_canonical	assembly_component	15208268	15218391	.	+	.	Name=Y46E12BM;Note=Clone:Y46E12BM,GenBank:FO081797
II	Genomic_canonical	assembly_component	15218192	15264191	.	+	.	Name=Y46E12BL;Note=Clone:Y46E12BL,GenBank:FO080087
III	Genomic_canonical	assembly_component	220855	343304	.	+	.	Name=Y50D7A;Note=Clone:Y50D7A,GenBank:FO081772
III	Genomic_canonical	assembly_component	401976	408804	.	+	.	Name=Y55B1BL;Note=Clone:Y55B1BL,GenBank:FO081622
III	Genomic_canonical	assembly_component	408105	427713	.	+	.	Name=Y55B1BM;Note=Clone:Y55B1BM,GenBank:FO081812
III	Genomic_canonical	assembly_component	427514	473675	.	+	.	Name=Y55B1BR;Note=Clone:Y55B1BR,GenBank:FO081109
III	Genomic_canonical	assembly_component	573899	587307	.	+	.	Name=Y55B1AL;Note=Clone:Y55B1AL,GenBank:FO080183
III	Genomic_canonical	assembly_component	582308	595987	.	+	.	Name=Y55B1AM;Note=Clone:Y55B1AM,GenBank:FO081811
III	Genomic_canonical	assembly_component	587188	606417	.	+	.	Name=Y55B1AR;Note=Clone:Y55B1AR,GenBank:FO081736
III	Genomic_canonical	assembly_component	858387	866838	.	+	.	Name=Y6D11A;Note=Clone:Y6D11A,GenBank:FO081578
III	Genomic_canonical	assembly_component	922867	934950	.	+	.	Name=Y7G10A;Note=Clone:Y7G10A,GenBank:FO081213
III	Genomic_canonical	assembly_component	1005807	1028782	.	+	.	Name=Y34F4;Note=Clone:Y34F4,GenBank:FO081063
III	Genomic_canonical	assembly_component	1060106	1086430	.	+	.	Name=Y92C3B;Note=Clone:Y92C3B,GenBank:FO080242
III	Genomic_canonical	assembly_component	1116510	1157149	.	+	.	Name=Y71D11A;Note=Clone:Y71D11A,GenBank:FO081503
III	Genomic_canonical	assembly_component	1156950	1181153	.	+	.	Name=Y92C3A;Note=Clone:Y92C3A,GenBank:FO081819
III	Genomic_canonical	assembly_component	1177655	1265433	.	+	.	Name=Y119D3B;Note=Clone:Y119D3B,GenBank:FO081827
III	Genomic_canonical	assembly_component	1291666	1306729	.	+	.	Name=Y119D3A;Note=Clone:Y119D3A,GenBank:FO081826
III	Genomic_canonical	assembly_component	1305730	1356184	.	+	.	Name=Y82E9BL;Note=Clone:Y82E9BL,GenBank:FO081825
III	Genomic_canonical	assembly_component	1355985	1495275	.	+	.	Name=Y82E9BR;Note=Clone:Y82E9BR,GenBank:FO081643
III	Genomic_canonical	assembly_component	1532551	1576914	.	+	.	Name=Y67D2;Note=Clone:Y67D2,GenBank:FO081642
III	Genomic_canonical	assembly_component	1576115	1665485	.	+	.	Name=Y22D7AL;Note=Clone:Y22D7AL,GenBank:FO081783
III	Genomic_canonical	assembly_component	1665286	1743638	.	+	.	Name=Y22D7AR;Note=Clone:Y22D7AR,GenBank:FO081784
III	Genomic_canonical	assembly_component	1743439	1775458	.	+	.	Name=Y46E12A;Note=Clone:Y46E12A,GenBank:FO081785
III	Genomic_canonical	assembly_component	1772259	1846778	.	+	.	Name=Y39A3CL;Note=Clone:Y39A3CL,GenBank:FO081789
III	Genomic_canonical	assembly_component	1844079	1847076	.	+	.	Name=Y39A3CM;Note=Clone:Y39A3CM,GenBank:FO081790
III	Genomic_canonical	assembly_component	1846877	1883224	.	+	.	Name=Y39A3CR;Note=Clone:Y39A3CR,GenBank:FO080225
III	Genomic_canonical	assembly_component	1980803	2016043	.	+	.	Name=Y39A3B;Note=Clone:Y39A3B,GenBank:FO081640
III	Genomic_canonical	assembly_component	2054443	2079868	.	+	.	Name=Y39A3A;Note=Clone:Y39A3A,GenBank:FO081639
III	Genomic_canonical	assembly_component	2079869	2200416	.	+	.	Name=Y48G9A;Note=Clone:Y48G9A,GenBank:FO080824
III	Genomic_canonical	assembly_component	2258187	2261463	.	+	.	Name=Y54F10BL;Note=Clone:Y54F10BL,GenBank:FO081737
III	Genomic_canonical	assembly_component	2261264	2346659	.	+	.	Name=Y54F10BM;Note=Clone:Y54F10BM,GenBank:FO081808
III	Genomic_canonical	assembly_component	2346160	2350090	.	+	.	Name=Y54F10BR;Note=Clone:Y54F10BR,GenBank:FO081522
III	Genomic_canonical	assembly_component	2473485	2495004	.	+	.	Name=Y54F10AL;Note=Clone:Y54F10AL,GenBank:FO081031
III	Genomic_canonical	assembly_component	2489005	2566425	.	+	.	Name=Y54F10AM;Note=Clone:Y54F10AM,GenBank:FO081806
III	Genomic_canonical	assembly_component	2566226	2578506	.	+	.	Name=Y54F10AR;Note=Clone:Y54F10AR,GenBank:FO081807
III	Genomic_canonical	assembly_component	2578307	2636824	.	+	.	Name=Y71H2B;Note=Clone:Y71H2B,GenBank:FO081557
III	Genomic_canonical	assembly_component	2671973	2691528	.	+	.	Name=Y71H2AL;Note=Clone:Y71H2AL,GenBank:FO081556
III	Genomic_canonical	assembly_component	2691329	2835114	.	+	.	Name=Y71H2AM;Note=Clone:Y71H2AM,GenBank:FO081822
III	Genomic_canonical	assembly_component	2834615	2843417	.	+	.	Name=Y71H2AR;Note=Clone:Y71H2AR,GenBank:FO081570
III	Genomic_canonical	assembly_component	2968456	3054978	.	+	.	Name=Y55D5A;Note=Clone:Y55D5A,GenBank:FO081525
III	Genomic_canonical	assembly_component	3100159	3131794	.	+	.	Name=Y53G8B;Note=Clone:Y53G8B,GenBank:FO080851
III	Genomic_canonical	assembly_component	3237039	3253498	.	+	.	Name=Y53G8AL;Note=Clone:Y53G8AL,GenBank:FO081540
III	Genomic_canonical	assembly_component	3253299	3281624	.	+	.	Name=Y53G8AM;Note=Clone:Y53G8AM,GenBank:FO081802
III	Genomic_canonical	assembly_component	3281425	3339171	.	+	.	Name=Y53G8AR;Note=Clone:Y53G8AR,GenBank:FO081803
III	Genomic_canonical	assembly_component	3981827	3987989	.	+	.	Name=Y1A5A;Note=Clone:Y1A5A,GenBank:AL021177
III	Genomic_canonical	assembly_component	4243690	4249835	.	+	.	Name=Y44F5A;Note=Clone:Y44F5A,GenBank:AL021180
III	Genomic_canonical	assembly_component	5137372	5159571	.	+	.	Name=Y54H5A;Note=Clone:Y54H5A,GenBank:FO081201
III	Genomic_canonical	assembly_component	5346256	5405032	.	+	.	Name=Y32H12A;Note=Clone:Y32H12A,GenBank:FO081763
III	Genomic_canonical	assembly_component	5769820	5787811	.	+	.	Name=Y37B11A;Note=Clone:Y37B11A,GenBank:FO080137
III	Genomic_canonical	assembly_component	6124320	6154904	.	+	.	Name=Y42G9A;Note=Clone:Y42G9A,GenBank:FO081373
III	Genomic_canonical	assembly_component	6610200	6620070	.	+	.	Name=Y40D12A;Note=Clone:Y40D12A,GenBank:FO080525
III	Genomic_canonical	assembly_component	6725652	6736705	.	+	.	Name=Y102E9;Note=Clone:Y102E9,GenBank:FO081313
III	Genomic_canonical	assembly_component	7401609	7459293	.	+	.	Name=Y69F12A;Note=Clone:Y69F12A,GenBank:FO081549
III	Genomic_canonical	assembly_component	7592472	7603345	.	+	.	Name=Y80D4G;Note=Clone:Y80D4G,GenBank:FO081689
III	Genomic_canonical	assembly_component	10219391	10245643	.	+	.	Name=Y70G10A;Note=Clone:Y70G10A,GenBank:AL032660
III	Genomic_canonical	assembly_component	10559332	10595985	.	+	.	Name=Y45F3A;Note=Clone:Y45F3A,GenBank:AL032621
III	Genomic_canonical	assembly_component	10595880	10706839	.	+	.	Name=Y39A1A;Note=Clone:Y39A1A,GenBank:AL031633
III	Genomic_canonical	assembly_component	10759888	10798410	.	+	.	Name=Y39A1B;Note=Clone:Y39A1B,GenBank:AL021482
III	Genomic_canonical	assembly_component	10850321	10868466	.	+	.	Name=Y39A1C;Note=Clone:Y39A1C,GenBank:AL023839
III	Genomic_canonical	assembly_component	10939162	10947621	.	+	.	Name=Y52D3;Note=Clone:Y52D3,GenBank:Z99276
III	Genomic_canonical	assembly_component	10947516	10954815	.	+	.	Name=Y48A6A;Note=Clone:Y48A6A,GenBank:AL023843
III	Genomic_canonical	assembly_component	10990145	11065217	.	+	.	Name=Y48A6B;Note=Clone:Y48A6B,GenBank:AL023844
III	Genomic_canonical	assembly_component	11100516	11136254	.	+	.	Name=Y48A6C;Note=Clone:Y48A6C,GenBank:AL032642
III	Genomic_canonical	assembly_component	11136151	11335965	.	+	.	Name=Y47D3A;Note=Clone:Y47D3A,GenBank:AL117202
III	Genomic_canonical	assembly_component	11375836	11471803	.	+	.	Name=Y47D3B;Note=Clone:Y47D3B,GenBank:AL031635
III	Genomic_canonical	assembly_component	11471698	11487541	.	+	.	Name=Y66A7AL;Note=Clone:Y66A7AL,GenBank:AL590343
III	Genomic_canonical	assembly_component	11487435	11610583	.	+	.	Name=Y66D12A;Note=Clone:Y66D12A,GenBank:AL161712
III	Genomic_canonical	assembly_component	11610478	11638038	.	+	.	Name=Y66A7AR;Note=Clone:Y66A7AR,GenBank:AL590342
III	Genomic_canonical	assembly_component	11637948	11767008	.	+	.	Name=Y41C4A;Note=Clone:Y41C4A,GenBank:AL032627
III	Genomic_canonical	assembly_component	11833800	12003163	.	+	.	Name=Y56A3A;Note=Clone:Y56A3A,GenBank:AL132860
III	Genomic_canonical	assembly_component	12003064	12069207	.	+	.	Name=Y79H2A;Note=Clone:Y79H2A,GenBank:AL110501
III	Genomic_canonical	assembly_component	12069105	12367511	.	+	.	Name=Y75B8A;Note=Clone:Y75B8A,GenBank:AL033514
III	Genomic_canonical	assembly_component	12367405	12492994	.	+	.	Name=Y49E10;Note=Clone:Y49E10,GenBank:Z98866
III	Genomic_canonical	assembly_component	12492890	12750594	.	+	.	Name=Y111B2A;Note=Clone:Y111B2A,GenBank:AL132904
III	Genomic_canonical	assembly_component	12816915	12950013	.	+	.	Name=Y37D8A;Note=Clone:Y37D8A,GenBank:AL032626
III	Genomic_canonical	assembly_component	12949908	12976116	.	+	.	Name=Y39E4A;Note=Clone:Y39E4A,GenBank:AL021480
III	Genomic_canonical	assembly_component	13067398	13223090	.	+	.	Name=Y39E4B;Note=Clone:Y39E4B,GenBank:AL110487
III	Genomic_canonical	assembly_component	13222974	13246901	.	+	.	Name=Y43F4A;Note=Clone:Y43F4A,GenBank:Z99271
III	Genomic_canonical	assembly_component	13286973	13318216	.	+	.	Name=Y43F4B;Note=Clone:Y43F4B,GenBank:AL021481
III	Genomic_canonical	assembly_component	13360733	13362190	.	+	.	Name=Y43F4C;Note=Clone:Y43F4C,GenBank:Z99272
III	Genomic_canonical	assembly_component	13442746	13462037	.	+	.	Name=Y76A2A;Note=Clone:Y76A2A,GenBank:AL032665
III	Genomic_canonical	assembly_component	13518359	13554228	.	+	.	Name=Y76A2B;Note=Clone:Y76A2B,GenBank:AL032658
III	Genomic_canonical	assembly_component	13586634	13603142	.	+	.	Name=Y76A2C;Note=Clone:Y76A2C,GenBank:AL032666
IV	Genomic_canonical	assembly_component	139	47215	.	+	.	Name=Y38C1AB;Note=Clone:Y38C1AB,GenBank:FO080984
IV	Genomic_canonical	assembly_component	146938	225213	.	+	.	Name=Y38C1AA;Note=Clone:Y38C1AA,GenBank:FO081257
IV	Genomic_canonical	assembly_component	349113	383234	.	+	.	Name=Y66H1B;Note=Clone:Y66H1B,GenBank:FO081175
IV	Genomic_canonical	assembly_component	425890	453915	.	+	.	Name=Y66H1A;Note=Clone:Y66H1A,GenBank:FO081659
IV	Genomic_canonical	assembly_component	498115	503086	.	+	.	Name=Y65D7A;Note=Clone:Y65D7A,GenBank:FO081651
IV	Genomic_canonical	assembly_component	689413	760926	.	+	.	Name=Y55F3C;Note=Clone:Y55F3C,GenBank:FO081352
IV	Genomic_canonical	assembly_component	799101	824877	.	+	.	Name=Y55F3BL;Note=Clone:Y55F3BL,GenBank:FO081485
IV	Genomic_canonical	assembly_component	824678	827159	.	+	.	Name=Y55F3BM;Note=Clone:Y55F3BM,GenBank:FO081814
IV	Genomic_canonical	assembly_component	826960	882258	.	+	.	Name=Y55F3BR;Note=Clone:Y55F3BR,GenBank:FO080861
IV	Genomic_canonical	assembly_component	950372	983189	.	+	.	Name=Y55F3AL;Note=Clone:Y55F3AL,GenBank:FO081507
IV	Genomic_canonical	assembly_component	979390	1087094	.	+	.	Name=Y55F3AM;Note=Clone:Y55F3AM,GenBank:FO081813
IV	Genomic_canonical	assembly_component	1085895	1103016	.	+	.	Name=Y55F3AR;Note=Clone:Y55F3AR,GenBank:FO080854
IV	Genomic_canonical	assembly_component	1177953	1204981	.	+	.	Name=Y104H12D;Note=Clone:Y104H12D,GenBank:FO080911
IV	Genomic_canonical	assembly_component	1233501	1234866	.	+	.	Name=Y104H12C;Note=Clone:Y104H12C,GenBank:FO081324
IV	Genomic_canonical	assembly_component	1284061	1290617	.	+	.	Name=Y104H12BL;Note=Clone:Y104H12BL,GenBank:FO080471
IV	Genomic_canonical	assembly_component	1290418	1303016	.	+	.	Name=Y104H12BR;Note=Clone:Y104H12BR,GenBank:FO081459
IV	Genomic_canonical	assembly_component	1381807	1389731	.	+	.	Name=Y104H12A;Note=Clone:Y104H12A,GenBank:FO080407
IV	Genomic_canonical	assembly_component	1389532	1510612	.	+	.	Name=Y77E11A;Note=Clone:Y77E11A,GenBank:FO081581
IV	Genomic_canonical	assembly_component	1557103	1695122	.	+	.	Name=Y41D4B;Note=Clone:Y41D4B,GenBank:FO080782
IV	Genomic_canonical	assembly_component	1728396	1786464	.	+	.	Name=Y41D4A;Note=Clone:Y41D4A,GenBank:FO081611
IV	Genomic_canonical	assembly_component	1786265	1831532	.	+	.	Name=Y38C1BA;Note=Clone:Y38C1BA,GenBank:FO081597
IV	Genomic_canonical	assembly_component	1915298	1921466	.	+	.	Name=Y48A5B;Note=Clone:Y48A5B,GenBank:FO081440
IV	Genomic_canonical	assembly_component	1960449	1970086	.	+	.	Name=Y48A5A;Note=Clone:Y48A5A,GenBank:FO081439
IV	Genomic_canonical	assembly_component	1969887	2046371	.	+	.	Name=Y76B12C;Note=Clone:Y76B12C,GenBank:FO081666
IV	Genomic_canonical	assembly_component	2133736	2146349	.	+	.	Name=Y76B12A;Note=Clone:Y76B12A,GenBank:FO080635
IV	Genomic_canonical	assembly_component	2177881	2184703	.	+	.	Name=Y71G10AL;Note=Clone:Y71G10AL,GenBank:FO080950
IV	Genomic_canonical	assembly_component	2183304	2212826	.	+	.	Name=Y71G10AR;Note=Clone:Y71G10AR,GenBank:FO081703
IV	Genomic_canonical	assembly_component	2292531	2332235	.	+	.	Name=Y38F2AL;Note=Clone:Y38F2AL,GenBank:FO080811
IV	Genomic_canonical	assembly_component	2332036	2429193	.	+	.	Name=Y38F2AR;Note=Clone:Y38F2AR,GenBank:FO080872
IV	Genomic_canonical	assembly_component	2476589	2484115	.	+	.	Name=Y69A2AL;Note=Clone:Y69A2AL,GenBank:FO080654
IV	Genomic_canonical	assembly_component	2483916	2672532	.	+	.	Name=Y69A2AR;Note=Clone:Y69A2AR,GenBank:FO081818
IV	Genomic_canonical	assembly_component	2672333	2750421	.	+	.	Name=Y94H6A;Note=Clone:Y94H6A,GenBank:FO081810
IV	Genomic_canonical	assembly_component	2750222	3036901	.	+	.	Name=Y54G2A;Note=Clone:Y54G2A,GenBank:FO081809
IV	Genomic_canonical	assembly_component	3032702	3136371	.	+	.	Name=Y67D8C;Note=Clone:Y67D8C,GenBank:FO081744
IV	Genomic_canonical	assembly_component	3169833	3203861	.	+	.	Name=Y67D8B;Note=Clone:Y67D8B,GenBank:FO081658
IV	Genomic_canonical	assembly_component	3217067	3255247	.	+	.	Name=Y67D8A;Note=Clone:Y67D8A,GenBank:FO081657
IV	Genomic_canonical	assembly_component	3312758	3319573	.	+	.	Name=Y55H10B;Note=Clone:Y55H10B,GenBank:FO081371
IV	Genomic_canonical	assembly_component	3353696	3378122	.	+	.	Name=Y55H10A;Note=Clone:Y55H10A,GenBank:FO080231
IV	Genomic_canonical	assembly_component	3514120	3530079	.	+	.	Name=Y37E11C;Note=Clone:Y37E11C,GenBank:FO080482
IV	Genomic_canonical	assembly_component	3577777	3606497	.	+	.	Name=Y37E11B;Note=Clone:Y37E11B,GenBank:FO080119
IV	Genomic_canonical	assembly_component	3652034	3720163	.	+	.	Name=Y37E11AL;Note=Clone:Y37E11AL,GenBank:FO080976
IV	Genomic_canonical	assembly_component	3716164	3736672	.	+	.	Name=Y37E11AM;Note=Clone:Y37E11AM,GenBank:FO081788
IV	Genomic_canonical	assembly_component	3735673	3766940	.	+	.	Name=Y37E11AR;Note=Clone:Y37E11AR,GenBank:FO081773
IV	Genomic_canonical	assembly_component	3931255	3962214	.	+	.	Name=Y46C8AL;Note=Clone:Y46C8AL,GenBank:FO081491
IV	Genomic_canonical	assembly_component	3962015	3963932	.	+	.	Name=Y46C8AM;Note=Clone:Y46C8AM,GenBank:FO081796
IV	Genomic_canonical	assembly_component	3963533	3972439	.	+	.	Name=Y46C8AR;Note=Clone:Y46C8AR,GenBank:FO081404
IV	Genomic_canonical	assembly_component	4317407	4321949	.	+	.	Name=Y24D9B;Note=Clone:Y24D9B,GenBank:FO081152
IV	Genomic_canonical	assembly_component	4376737	4417908	.	+	.	Name=Y24D9A;Note=Clone:Y24D9A,GenBank:FO081479
IV	Genomic_canonical	assembly_component	4417709	4421262	.	+	.	Name=Y68G5A;Note=Clone:Y68G5A,GenBank:FO081676
IV	Genomic_canonical	assembly_component	4749132	4768751	.	+	.	Name=Y17G9B;Note=Clone:Y17G9B,GenBank:FO081040
IV	Genomic_canonical	assembly_component	4834724	4876058	.	+	.	Name=Y17G9A;Note=Clone:Y17G9A,GenBank:FO081530
IV	Genomic_canonical	assembly_component	4909865	4976433	.	+	.	Name=Y9C9A;Note=Clone:Y9C9A,GenBank:FO081038
IV	Genomic_canonical	assembly_component	5206912	5231242	.	+	.	Name=Y59E9AL;Note=Clone:Y59E9AL,GenBank:FO081766
IV	Genomic_canonical	assembly_component	5230743	5251465	.	+	.	Name=Y59E9AR;Note=Clone:Y59E9AR,GenBank:FO081311
IV	Genomic_canonical	assembly_component	5318722	5357912	.	+	.	Name=Y4C6B;Note=Clone:Y4C6B,GenBank:FO081369
IV	Genomic_canonical	assembly_component	5427763	5463612	.	+	.	Name=Y4C6A;Note=Clone:Y4C6A,GenBank:FO081780
IV	Genomic_canonical	assembly_component	5462413	5473182	.	+	.	Name=Y52D5A;Note=Clone:Y52D5A,GenBank:FO081728
IV	Genomic_canonical	assembly_component	5902361	5902811	.	+	.	Name=Y44C4A;Note=Clone:Y44C4A,GenBank:FO081523
IV	Genomic_canonical	assembly_component	6286129	6502271	.	+	.	Name=Y73B6BL;Note=Clone:Y73B6BL,GenBank:FO081731
IV	Genomic_canonical	assembly_component	6502072	6514030	.	+	.	Name=Y73B6BR;Note=Clone:Y73B6BR,GenBank:FO080266
IV	Genomic_canonical	assembly_component	6659565	6752832	.	+	.	Name=Y73B6A;Note=Clone:Y73B6A,GenBank:FO080249
IV	Genomic_canonical	assembly_component	7057151	7068063	.	+	.	Name=Y43B11AL;Note=Clone:Y43B11AL,GenBank:FO080397
IV	Genomic_canonical	assembly_component	7067764	7070877	.	+	.	Name=Y43B11AM;Note=Clone:Y43B11AM,GenBank:FO081793
IV	Genomic_canonical	assembly_component	7070678	7086445	.	+	.	Name=Y43B11AR;Note=Clone:Y43B11AR,GenBank:FO081794
IV	Genomic_canonical	assembly_component	7326355	7372224	.	+	.	Name=Y40C5A;Note=Clone:Y40C5A,GenBank:FO081374
IV	Genomic_canonical	assembly_component	7588887	7605985	.	+	.	Name=Y2C2A;Note=Clone:Y2C2A,GenBank:FO081279
IV	Genomic_canonical	assembly_component	7987971	8013268	.	+	.	Name=Y42H9B;Note=Clone:Y42H9B,GenBank:FO080677
IV	Genomic_canonical	assembly_component	8086974	8100577	.	+	.	Name=Y42H9AL;Note=Clone:Y42H9AL,GenBank:FO080615
IV	Genomic_canonical	assembly_component	8100378	8116292	.	+	.	Name=Y42H9AR;Note=Clone:Y42H9AR,GenBank:FO081376
IV	Genomic_canonical	assembly_component	8549404	8562950	.	+	.	Name=Y59H11AL;Note=Clone:Y59H11AL,GenBank:FO080479
IV	Genomic_canonical	assembly_component	8562751	8582098	.	+	.	Name=Y59H11AM;Note=Clone:Y59H11AM,GenBank:FO081816
IV	Genomic_canonical	assembly_component	8581899	8605739	.	+	.	Name=Y59H11AR;Note=Clone:Y59H11AR,GenBank:FO081372
IV	Genomic_canonical	assembly_component	9037457	9066255	.	+	.	Name=Y73F4A;Note=Clone:Y73F4A,GenBank:AL032661
IV	Genomic_canonical	assembly_component	9227816	9285153	.	+	.	Name=Y11D7A;Note=Clone:Y11D7A,GenBank:AL032632
IV	Genomic_canonical	assembly_component	10267076	10284701	.	+	.	Name=Y43C5A;Note=Clone:Y43C5A,GenBank:AL023838
IV	Genomic_canonical	assembly_component	10339874	10354339	.	+	.	Name=Y43C5B;Note=Clone:Y43C5B,GenBank:AL023841
IV	Genomic_canonical	assembly_component	10943193	10980250	.	+	.	Name=Y69E1A;Note=Clone:Y69E1A,GenBank:AL034365
IV	Genomic_canonical	assembly_component	10980147	10991103	.	+	.	Name=Y43E12A;Note=Clone:Y43E12A,GenBank:AL021176
IV	Genomic_canonical	assembly_component	11061704	11080100	.	+	.	Name=Y5F2A;Note=Clone:Y5F2A,GenBank:AL032641
IV	Genomic_canonical	assembly_component	11603826	11619055	.	+	.	Name=Y24F12A;Note=Clone:Y24F12A,GenBank:AL110480
IV	Genomic_canonical	assembly_component	12019256	12024925	.	+	.	Name=Y64F11A;Note=Clone:Y64F11A,GenBank:AL023848
IV	Genomic_canonical	assembly_component	12024826	12027338	.	+	.	Name=Y40D7A;Note=Clone:Y40D7A,GenBank:AL023840
IV	Genomic_canonical	assembly_component	12222881	12258802	.	+	.	Name=Y39C12A;Note=Clone:Y39C12A,GenBank:AL132859
IV	Genomic_canonical	assembly_component	12318182	12318472	.	+	.	Name=Y39C12B;Note=Clone:Y39C12B,GenBank:AL110489
IV	Genomic_canonical	assembly_component	12599373	12616338	.	+	.	Name=Y55D9A;Note=Clone:Y55D9A,GenBank:AL032649
IV	Genomic_canonical	assembly_component	13265412	13323156	.	+	.	Name=Y67H2A;Note=Clone:Y67H2A,GenBank:AL132951
IV	Genomic_canonical	assembly_component	13358830	13416066	.	+	.	Name=Y62E10A;Note=Clone:Y62E10A,GenBank:AL132865
IV	Genomic_canonical	assembly_component	13454664	13489740	.	+	.	Name=Y38H8A;Note=Clone:Y38H8A,GenBank:AL021483
IV	Genomic_canonical	assembly_component	13489635	13515977	.	+	.	Name=Y45F10A;Note=Clone:Y45F10A,GenBank:AL021488
IV	Genomic_canonical	assembly_component	13555041	13607633	.	+	.	Name=Y45F10B;Note=Clone:Y45F10B,GenBank:AL021487
IV	Genomic_canonical	assembly_component	13653105	13671910	.	+	.	Name=Y45F10C;Note=Clone:Y45F10C,GenBank:Z99273
IV	Genomic_canonical	assembly_component	13759757	13819329	.	+	.	Name=Y45F10D;Note=Clone:Y45F10D,GenBank:AL021492
IV	Genomic_canonical	assembly_component	13894085	13937052	.	+	.	Name=Y37A1A;Note=Clone:Y37A1A,GenBank:Z99270
IV	Genomic_canonical	assembly_component	13973155	14072237	.	+	.	Name=Y37A1B;Note=Clone:Y37A1B,GenBank:AL023835
IV	Genomic_canonical	assembly_component	14114891	14117278	.	+	.	Name=Y37A1C;Note=Clone:Y37A1C,GenBank:AL021476
IV	Genomic_canonical	assembly_component	14231015	14318444	.	+	.	Name=Y64G10A;Note=Clone:Y64G10A,GenBank:AL110498
IV	Genomic_canonical	assembly_component	14318341	14400387	.	+	.	Name=Y67A10A;Note=Clone:Y67A10A,GenBank:AL117206
IV	Genomic_canonical	assembly_component	14469358	14471155	.	+	.	Name=Y67A10B;Note=Clone:Y67A10B,GenBank:AL023849
IV	Genomic_canonical	assembly_component	14471055	14517609	.	+	.	Name=Y57G11A;Note=Clone:Y57G11A,GenBank:Z99279
IV	Genomic_canonical	assembly_component	14550363	14599251	.	+	.	Name=Y57G11B;Note=Clone:Y57G11B,GenBank:Z99280
IV	Genomic_canonical	assembly_component	14637269	14950845	.	+	.	Name=Y57G11C;Note=Clone:Y57G11C,GenBank:Z99281
IV	Genomic_canonical	assembly_component	14950742	15101382	.	+	.	Name=Y41E3;Note=Clone:Y41E3,GenBank:Z95559
IV	Genomic_canonical	assembly_component	15140358	15226443	.	+	.	Name=Y40H7A;Note=Clone:Y40H7A,GenBank:AL033510
IV	Genomic_canonical	assembly_component	15226338	15549111	.	+	.	Name=Y73F8A;Note=Clone:Y73F8A,GenBank:AL132862
IV	Genomic_canonical	assembly_component	15548990	15863827	.	+	.	Name=Y105C5A;Note=Clone:Y105C5A,GenBank:AL117193
IV	Genomic_canonical	assembly_component	15863724	16185028	.	+	.	Name=Y105C5B;Note=Clone:Y105C5B,GenBank:AL110479
IV	Genomic_canonical	assembly_component	16184928	16203426	.	+	.	Name=Y7A9A;Note=Clone:Y7A9A,GenBank:Z99284
IV	Genomic_canonical	assembly_component	16241772	16247494	.	+	.	Name=Y7A9B;Note=Clone:Y7A9B,GenBank:Z99285
IV	Genomic_canonical	assembly_component	16281156	16307976	.	+	.	Name=Y7A9C;Note=Clone:Y7A9C,GenBank:Z99286
IV	Genomic_canonical	assembly_component	16375451	16392606	.	+	.	Name=Y7A9D;Note=Clone:Y7A9D,GenBank:Z99287
IV	Genomic_canonical	assembly_component	16392506	16417410	.	+	.	Name=Y65A5A;Note=Clone:Y65A5A,GenBank:Z92864
IV	Genomic_canonical	assembly_component	16417310	16450979	.	+	.	Name=Y10G11A;Note=Clone:Y10G11A,GenBank:AL161711
IV	Genomic_canonical	assembly_component	16471836	16741455	.	+	.	Name=Y51H4A;Note=Clone:Y51H4A,GenBank:AL132952
IV	Genomic_canonical	assembly_component	16741350	16800670	.	+	.	Name=Y43D4A;Note=Clone:Y43D4A,GenBank:AL132846
IV	Genomic_canonical	assembly_component	16800565	16855264	.	+	.	Name=Y116A8A;Note=Clone:Y116A8A,GenBank:AL117205
IV	Genomic_canonical	assembly_component	16900091	17160434	.	+	.	Name=Y116A8C;Note=Clone:Y116A8C,GenBank:AL117204
IV	Genomic_canonical	assembly_component	17203175	17232519	.	+	.	Name=Y116A8B;Note=Clone:Y116A8B,GenBank:AL021469
V	Genomic_canonical	assembly_component	49955	69322	.	+	.	Name=Y38C9B;Note=Clone:Y38C9B,GenBank:FO080177
V	Genomic_canonical	assembly_component	106507	126458	.	+	.	Name=Y38C9A;Note=Clone:Y38C9A,GenBank:FO081493
V	Genomic_canonical	assembly_component	160188	195204	.	+	.	Name=Y108G3AL;Note=Clone:Y108G3AL,GenBank:FO081768
V	Genomic_canonical	assembly_component	195005	199571	.	+	.	Name=Y108G3AR;Note=Clone:Y108G3AR,GenBank:FO081021
V	Genomic_canonical	assembly_component	258152	292695	.	+	.	Name=Y58G8A;Note=Clone:Y58G8A,GenBank:FO081283
V	Genomic_canonical	assembly_component	323795	330770	.	+	.	Name=Y39D8C;Note=Clone:Y39D8C,GenBank:FO081282
V	Genomic_canonical	assembly_component	359713	380015	.	+	.	Name=Y39D8B;Note=Clone:Y39D8B,GenBank:FO081741
V	Genomic_canonical	assembly_component	419629	421766	.	+	.	Name=Y39D8A;Note=Clone:Y39D8A,GenBank:FO080237
V	Genomic_canonical	assembly_component	688615	713854	.	+	.	Name=Y49C4A;Note=Clone:Y49C4A,GenBank:FO081566
V	Genomic_canonical	assembly_component	931352	1003676	.	+	.	Name=Y50D4C;Note=Clone:Y50D4C,GenBank:FO081564
V	Genomic_canonical	assembly_component	1079843	1119170	.	+	.	Name=Y50D4B;Note=Clone:Y50D4B,GenBank:FO081617
V	Genomic_canonical	assembly_component	1180085	1225376	.	+	.	Name=Y50D4A;Note=Clone:Y50D4A,GenBank:FO080831
V	Genomic_canonical	assembly_component	1267403	1278135	.	+	.	Name=Y75B7B;Note=Clone:Y75B7B,GenBank:FO080830
V	Genomic_canonical	assembly_component	1326232	1385178	.	+	.	Name=Y75B7AL;Note=Clone:Y75B7AL,GenBank:FO081159
V	Genomic_canonical	assembly_component	1384979	1392191	.	+	.	Name=Y75B7AR;Note=Clone:Y75B7AR,GenBank:FO081685
V	Genomic_canonical	assembly_component	1619415	1646503	.	+	.	Name=Y46H3D;Note=Clone:Y46H3D,GenBank:FO081162
V	Genomic_canonical	assembly_component	1686317	1718579	.	+	.	Name=Y46H3C;Note=Clone:Y46H3C,GenBank:FO081587
V	Genomic_canonical	assembly_component	1756201	1765862	.	+	.	Name=Y46H3B;Note=Clone:Y46H3B,GenBank:FO081308
V	Genomic_canonical	assembly_component	1801449	1823518	.	+	.	Name=Y46H3A;Note=Clone:Y46H3A,GenBank:FO081307
V	Genomic_canonical	assembly_component	1823119	1835077	.	+	.	Name=Y32G9B;Note=Clone:Y32G9B,GenBank:FO081724
V	Genomic_canonical	assembly_component	1875115	1923224	.	+	.	Name=Y32G9A;Note=Clone:Y32G9A,GenBank:FO081712
V	Genomic_canonical	assembly_component	1959951	1967350	.	+	.	Name=Y40B10B;Note=Clone:Y40B10B,GenBank:FO081711
V	Genomic_canonical	assembly_component	2033305	2083702	.	+	.	Name=Y40B10A;Note=Clone:Y40B10A,GenBank:FO081304
V	Genomic_canonical	assembly_component	2185057	2210257	.	+	.	Name=Y5H2B;Note=Clone:Y5H2B,GenBank:FO080876
V	Genomic_canonical	assembly_component	2264874	2276476	.	+	.	Name=Y5H2A;Note=Clone:Y5H2A,GenBank:FO081356
V	Genomic_canonical	assembly_component	2298976	2322739	.	+	.	Name=Y19D10B;Note=Clone:Y19D10B,GenBank:FO081155
V	Genomic_canonical	assembly_component	2346635	2414577	.	+	.	Name=Y19D10A;Note=Clone:Y19D10A,GenBank:FO080522
V	Genomic_canonical	assembly_component	2522361	2573595	.	+	.	Name=Y45G12C;Note=Clone:Y45G12C,GenBank:FO080245
V	Genomic_canonical	assembly_component	2688562	2706788	.	+	.	Name=Y45G12B;Note=Clone:Y45G12B,GenBank:FO080651
V	Genomic_canonical	assembly_component	2854414	2858873	.	+	.	Name=Y45G12A;Note=Clone:Y45G12A,GenBank:FO081314
V	Genomic_canonical	assembly_component	3097179	3133455	.	+	.	Name=Y73C8C;Note=Clone:Y73C8C,GenBank:FO080919
V	Genomic_canonical	assembly_component	3179936	3200442	.	+	.	Name=Y73C8B;Note=Clone:Y73C8B,GenBank:FO080797
V	Genomic_canonical	assembly_component	3238016	3244445	.	+	.	Name=Y73C8A;Note=Clone:Y73C8A,GenBank:FO081609
V	Genomic_canonical	assembly_component	3659412	3675450	.	+	.	Name=Y39H10B;Note=Clone:Y39H10B,GenBank:FO081513
V	Genomic_canonical	assembly_component	3732322	3769073	.	+	.	Name=Y39H10A;Note=Clone:Y39H10A,GenBank:FO081678
V	Genomic_canonical	assembly_component	4139384	4147873	.	+	.	Name=Y45G5AL;Note=Clone:Y45G5AL,GenBank:FO081705
V	Genomic_canonical	assembly_component	4144874	4191699	.	+	.	Name=Y45G5AM;Note=Clone:Y45G5AM,GenBank:FO081795
V	Genomic_canonical	assembly_component	4189400	4192115	.	+	.	Name=Y45G5AR;Note=Clone:Y45G5AR,GenBank:FO081575
V	Genomic_canonical	assembly_component	4409283	4446764	.	+	.	Name=Y47D7A;Note=Clone:Y47D7A,GenBank:FO081134
V	Genomic_canonical	assembly_component	4536047	4616652	.	+	.	Name=Y61A9LA;Note=Clone:Y61A9LA,GenBank:FO081464
V	Genomic_canonical	assembly_component	4780061	4787326	.	+	.	Name=Y60C6A;Note=Clone:Y60C6A,GenBank:FO080621
V	Genomic_canonical	assembly_component	5058799	5089579	.	+	.	Name=Y58A7A;Note=Clone:Y58A7A,GenBank:FO080343
V	Genomic_canonical	assembly_component	5194692	5213776	.	+	.	Name=Y47A7;Note=Clone:Y47A7,GenBank:FO080302
V	Genomic_canonical	assembly_component	5213077	5231731	.	+	.	Name=Y49G5B;Note=Clone:Y49G5B,GenBank:FO080921
V	Genomic_canonical	assembly_component	5281702	5304917	.	+	.	Name=Y49G5A;Note=Clone:Y49G5A,GenBank:FO080134
V	Genomic_canonical	assembly_component	6055153	6102935	.	+	.	Name=Y38A10A;Note=Clone:Y38A10A,GenBank:FO081168
V	Genomic_canonical	assembly_component	6164036	6187589	.	+	.	Name=Y38B5A;Note=Clone:Y38B5A,GenBank:FO081528
V	Genomic_canonical	assembly_component	6506811	6509905	.	+	.	Name=Y40G12A;Note=Clone:Y40G12A,GenBank:FO081395
V	Genomic_canonical	assembly_component	6924166	6949915	.	+	.	Name=Y57E12B;Note=Clone:Y57E12B,GenBank:FO081627
V	Genomic_canonical	assembly_component	7054555	7062574	.	+	.	Name=Y57E12AL;Note=Clone:Y57E12AL,GenBank:FO081184
V	Genomic_canonical	assembly_component	7061975	7064896	.	+	.	Name=Y57E12AM;Note=Clone:Y57E12AM,GenBank:FO081815
V	Genomic_canonical	assembly_component	7064697	7068393	.	+	.	Name=Y57E12AR;Note=Clone:Y57E12AR,GenBank:FO081234
V	Genomic_canonical	assembly_component	7725881	7732121	.	+	.	Name=Y97E10C;Note=Clone:Y97E10C,GenBank:FO081706
V	Genomic_canonical	assembly_component	7910066	7946950	.	+	.	Name=Y97E10B;Note=Clone:Y97E10B,GenBank:FO081229
V	Genomic_canonical	assembly_component	7982612	7988848	.	+	.	Name=Y97E10AL;Note=Clone:Y97E10AL,GenBank:FO081228
V	Genomic_canonical	assembly_component	7988649	7995666	.	+	.	Name=Y97E10AM;Note=Clone:Y97E10AM,GenBank:FO081829
V	Genomic_canonical	assembly_component	7995467	8015826	.	+	.	Name=Y97E10AR;Note=Clone:Y97E10AR,GenBank:FO081378
V	Genomic_canonical	assembly_component	8326228	8331245	.	+	.	Name=Y51B11A;Note=Clone:Y51B11A,GenBank:FO080434
V	Genomic_canonical	assembly_component	9428195	9441172	.	+	.	Name=Y54B9A;Note=Clone:Y54B9A,GenBank:FO081562
V	Genomic_canonical	assembly_component	10254082	10286669	.	+	.	Name=Y22F5A;Note=Clone:Y22F5A,GenBank:AL021479
V	Genomic_canonical	assembly_component	10328623	10330744	.	+	.	Name=Y22F5B;Note=Clone:Y22F5B,GenBank:AL021478
V	Genomic_canonical	assembly_component	10427293	10454528	.	+	.	Name=Y32F6A;Note=Clone:Y32F6A,GenBank:AL021474
V	Genomic_canonical	assembly_component	10471002	10487772	.	+	.	Name=Y32F6B;Note=Clone:Y32F6B,GenBank:AL021475
V	Genomic_canonical	assembly_component	10604916	10612724	.	+	.	Name=Y24E3A;Note=Clone:Y24E3A,GenBank:AL023829
V	Genomic_canonical	assembly_component	11087202	11109758	.	+	.	Name=Y42A5A;Note=Clone:Y42A5A,GenBank:AL032618
V	Genomic_canonical	assembly_component	13428908	13447209	.	+	.	Name=Y2H9A;Note=Clone:Y2H9A,GenBank:AL021448
V	Genomic_canonical	assembly_component	14348128	14358691	.	+	.	Name=Y49A3A;Note=Clone:Y49A3A,GenBank:AL033512
V	Genomic_canonical	assembly_component	14567101	14593372	.	+	.	Name=Y40H4A;Note=Clone:Y40H4A,GenBank:AL034391
V	Genomic_canonical	assembly_component	14724985	14786848	.	+	.	Name=Y50E8A;Note=Clone:Y50E8A,GenBank:AL117200
V	Genomic_canonical	assembly_component	15106563	15109837	.	+	.	Name=Y75B12A;Note=Clone:Y75B12A,GenBank:AL032662
V	Genomic_canonical	assembly_component	15183196	15207101	.	+	.	Name=Y75B12B;Note=Clone:Y75B12B,GenBank:AL032663
V	Genomic_canonical	assembly_component	15423232	15431763	.	+	.	Name=Y36E3A;Note=Clone:Y36E3A,GenBank:AL032620
V	Genomic_canonical	assembly_component	15708993	15731369	.	+	.	Name=Y6E2A;Note=Clone:Y6E2A,GenBank:AL021175
V	Genomic_canonical	assembly_component	16486993	16495860	.	+	.	Name=Y32B12A;Note=Clone:Y32B12A,GenBank:AL023834
V	Genomic_canonical	assembly_component	16534637	16575298	.	+	.	Name=Y32B12B;Note=Clone:Y32B12B,GenBank:AL031632
V	Genomic_canonical	assembly_component	16603172	16617458	.	+	.	Name=Y32B12C;Note=Clone:Y32B12C,GenBank:AL031634
V	Genomic_canonical	assembly_component	16617353	16626892	.	+	.	Name=Y70C5A;Note=Clone:Y70C5A,GenBank:Z99282
V	Genomic_canonical	assembly_component	16660435	16663572	.	+	.	Name=Y70C5B;Note=Clone:Y70C5B,GenBank:AL021508
V	Genomic_canonical	assembly_component	16703355	16723993	.	+	.	Name=Y70C5C;Note=Clone:Y70C5C,GenBank:Z99283
V	Genomic_canonical	assembly_component	16785821	16787089	.	+	.	Name=Y70C5D;Note=Clone:Y70C5D,GenBank:AL021507
V	Genomic_canonical	assembly_component	16800610	16811839	.	+	.	Name=Y102A5A;Note=Clone:Y102A5A,GenBank:AL023822
V	Genomic_canonical	assembly_component	16850195	16854856	.	+	.	Name=Y102A5B;Note=Clone:Y102A5B,GenBank:AL023821
V	Genomic_canonical	assembly_component	16918013	17009298	.	+	.	Name=Y102A5C;Note=Clone:Y102A5C,GenBank:AL031627
V	Genomic_canonical	assembly_component	17121884	17147337	.	+	.	Name=Y102A5D;Note=Clone:Y102A5D,GenBank:AL031628
V	Genomic_canonical	assembly_component	17185124	17216558	.	+	.	Name=Y68A4A;Note=Clone:Y68A4A,GenBank:AL021503
V	Genomic_canonical	assembly_component	17241567	17248437	.	+	.	Name=Y68A4B;Note=Clone:Y68A4B,GenBank:AL023851
V	Genomic_canonical	assembly_component	17248332	17259914	.	+	.	Name=Y61B8A;Note=Clone:Y61B8A,GenBank:AL021501
V	Genomic_canonical	assembly_component	17302536	17314358	.	+	.	Name=Y61B8B;Note=Clone:Y61B8B,GenBank:AL021504
V	Genomic_canonical	assembly_component	17372072	17395616	.	+	.	Name=Y20C6A;Note=Clone:Y20C6A,GenBank:AL021473
V	Genomic_canonical	assembly_component	17589336	17622373	.	+	.	Name=Y6G8;Note=Clone:Y6G8,GenBank:Z92973
V	Genomic_canonical	assembly_component	17690601	17704611	.	+	.	Name=Y26G10;Note=Clone:Y26G10,GenBank:Z98860
V	Genomic_canonical	assembly_component	17704508	17705163	.	+	.	Name=Y94A7A;Note=Clone:Y94A7A,GenBank:AL023857
V	Genomic_canonical	assembly_component	17802305	17834870	.	+	.	Name=Y94A7B;Note=Clone:Y94A7B,GenBank:AL023856
V	Genomic_canonical	assembly_component	17834767	17880238	.	+	.	Name=Y59A8A;Note=Clone:Y59A8A,GenBank:AL132895
V	Genomic_canonical	assembly_component	17929555	18104218	.	+	.	Name=Y59A8B;Note=Clone:Y59A8B,GenBank:AL132898
V	Genomic_canonical	assembly_component	18104118	18144677	.	+	.	Name=Y37H2A;Note=Clone:Y37H2A,GenBank:AL132863
V	Genomic_canonical	assembly_component	18223933	18229879	.	+	.	Name=Y37H2B;Note=Clone:Y37H2B,GenBank:AL023836
V	Genomic_canonical	assembly_component	18268133	18280131	.	+	.	Name=Y37H2C;Note=Clone:Y37H2C,GenBank:AL023837
V	Genomic_canonical	assembly_component	18280026	18316328	.	+	.	Name=Y51A2A;Note=Clone:Y51A2A,GenBank:AL032635
V	Genomic_canonical	assembly_component	18372931	18401933	.	+	.	Name=Y51A2B;Note=Clone:Y51A2B,GenBank:AL021493
V	Genomic_canonical	assembly_component	18441281	18443512	.	+	.	Name=Y51A2C;Note=Clone:Y51A2C,GenBank:AL021494
V	Genomic_canonical	assembly_component	18479147	18618405	.	+	.	Name=Y51A2D;Note=Clone:Y51A2D,GenBank:AL021497
V	Genomic_canonical	assembly_component	18618306	18707309	.	+	.	Name=Y69H2;Note=Clone:Y69H2,GenBank:Z98877
V	Genomic_canonical	assembly_component	18707204	18728894	.	+	.	Name=Y17D7C;Note=Clone:Y17D7C,GenBank:AL021471
V	Genomic_canonical	assembly_component	18771671	18795923	.	+	.	Name=Y17D7B;Note=Clone:Y17D7B,GenBank:AL021472
V	Genomic_canonical	assembly_component	18834294	18855787	.	+	.	Name=Y17D7A;Note=Clone:Y17D7A,GenBank:AL021470
V	Genomic_canonical	assembly_component	18855681	18958175	.	+	.	Name=Y80D3A;Note=Clone:Y80D3A,GenBank:AL132853
V	Genomic_canonical	assembly_component	18958057	19204293	.	+	.	Name=Y39B6A;Note=Clone:Y39B6A,GenBank:AL132948
V	Genomic_canonical	assembly_component	19355822	19394677	.	+	.	Name=Y43F8A;Note=Clone:Y43F8A,GenBank:AL032640
V	Genomic_canonical	assembly_component	19451725	19553404	.	+	.	Name=Y43F8B;Note=Clone:Y43F8B,GenBank:AL032623
V	Genomic_canonical	assembly_component	19596840	19721905	.	+	.	Name=Y43F8C;Note=Clone:Y43F8C,GenBank:AL032637
V	Genomic_canonical	assembly_component	19721797	19735678	.	+	.	Name=Y116F11A;Note=Clone:Y116F11A,GenBank:AL132872
V	Genomic_canonical	assembly_component	19798277	19904054	.	+	.	Name=Y116F11B;Note=Clone:Y116F11B,GenBank:AL132943
V	Genomic_canonical	assembly_component	19903947	20026538	.	+	.	Name=Y60A3A;Note=Clone:Y60A3A,GenBank:AL117207
V	Genomic_canonical	assembly_component	20026426	20148904	.	+	.	Name=Y113G7A;Note=Clone:Y113G7A,GenBank:AL132858
V	Genomic_canonical	assembly_component	20187633	20276260	.	+	.	Name=Y113G7B;Note=Clone:Y113G7B,GenBank:AL110477
V	Genomic_canonical	assembly_component	20311909	20325131	.	+	.	Name=Y113G7C;Note=Clone:Y113G7C,GenBank:AL033509
V	Genomic_canonical	assembly_component	20325017	20349238	.	+	.	Name=Y38H6A;Note=Clone:Y38H6A,GenBank:AL032628
V	Genomic_canonical	assembly_component	20386081	20387685	.	+	.	Name=Y38H6B;Note=Clone:Y38H6B,GenBank:AL031631
V	Genomic_canonical	assembly_component	20495926	20559812	.	+	.	Name=Y38H6C;Note=Clone:Y38H6C,GenBank:AL031630
V	Genomic_canonical	assembly_component	20635112	20649388	.	+	.	Name=Y44A6B;Note=Clone:Y44A6B,GenBank:AL021491
V	Genomic_canonical	assembly_component	20709321	20723667	.	+	.	Name=Y44A6C;Note=Clone:Y44A6C,GenBank:AL021489
V	Genomic_canonical	assembly_component	20782102	20815941	.	+	.	Name=Y44A6D;Note=Clone:Y44A6D,GenBank:AL023842
V	Genomic_canonical	assembly_component	20916984	20919641	.	+	.	Name=Y44A6E;Note=Clone:Y44A6E,GenBank:AL033511
X	Genomic_canonical	assembly_component	25092	36502	.	+	.	Name=Y35H6;Note=Clone:Y35H6,GenBank:FO081757
X	Genomic_canonical	assembly_component	36303	159157	.	+	.	Name=Y73B3A;Note=Clone:Y73B3A,GenBank:FO081721
X	Genomic_canonical	assembly_component	199027	216099	.	+	.	Name=Y73B3B;Note=Clone:Y73B3B,GenBank:FO081720
X	Genomic_canonical	assembly_component	215900	216895	.	+	.	Name=Y15D9A;Note=Clone:Y15D9A,GenBank:FO080096
X	Genomic_canonical	assembly_component	256068	281612	.	+	.	Name=Y108F1;Note=Clone:Y108F1,GenBank:FO080095
X	Genomic_canonical	assembly_component	281413	296152	.	+	.	Name=Y47C4A;Note=Clone:Y47C4A,GenBank:FO081691
X	Genomic_canonical	assembly_component	676487	691162	.	+	.	Name=Y9C12A;Note=Clone:Y9C12A,GenBank:FO081073
X	Genomic_canonical	assembly_component	1656490	1657687	.	+	.	Name=Y75D11B;Note=Clone:Y75D11B,GenBank:FO081680
X	Genomic_canonical	assembly_component	1741199	1774209	.	+	.	Name=Y75D11A;Note=Clone:Y75D11A,GenBank:FO081079
X	Genomic_canonical	assembly_component	1871915	1892494	.	+	.	Name=Y59E1B;Note=Clone:Y59E1B,GenBank:FO080159
X	Genomic_canonical	assembly_component	1935433	1948460	.	+	.	Name=Y59E1A;Note=Clone:Y59E1A,GenBank:FO081444
X	Genomic_canonical	assembly_component	1989414	2002631	.	+	.	Name=Y40A1A;Note=Clone:Y40A1A,GenBank:FO081443
X	Genomic_canonical	assembly_component	2002432	2056776	.	+	.	Name=Y102A11A;Note=Clone:Y102A11A,GenBank:FO081432
X	Genomic_canonical	assembly_component	2724688	2746182	.	+	.	Name=Y76F7A;Note=Clone:Y76F7A,GenBank:FO081225
X	Genomic_canonical	assembly_component	2830913	2843446	.	+	.	Name=Y71H10B;Note=Clone:Y71H10B,GenBank:FO080403
X	Genomic_canonical	assembly_component	2933089	2946483	.	+	.	Name=Y71H10A;Note=Clone:Y71H10A,GenBank:FO081433
X	Genomic_canonical	assembly_component	2946284	3006436	.	+	.	Name=Y41G9A;Note=Clone:Y41G9A,GenBank:FO081792
X	Genomic_canonical	assembly_component	3006237	3015804	.	+	.	Name=Y48D7A;Note=Clone:Y48D7A,GenBank:FO081649
X	Genomic_canonical	assembly_component	4024980	4061064	.	+	.	Name=Y80E2A;Note=Clone:Y80E2A,GenBank:FO081665
X	Genomic_canonical	assembly_component	5041609	5057642	.	+	.	Name=Y64H9A;Note=Clone:Y64H9A,GenBank:FO080660
X	Genomic_canonical	assembly_component	5236835	5285496	.	+	.	Name=Y34B4A;Note=Clone:Y34B4A,GenBank:FO081274
X	Genomic_canonical	assembly_component	5912441	5925443	.	+	.	Name=Y23B4A;Note=Clone:Y23B4A,GenBank:FO080886
X	Genomic_canonical	assembly_component	6130470	6134595	.	+	.	Name=Y72A10A;Note=Clone:Y72A10A,GenBank:FO080556
X	Genomic_canonical	assembly_component	7076661	7085648	.	+	.	Name=Y1B5A;Note=Clone:Y1B5A,GenBank:FO080189
X	Genomic_canonical	assembly_component	9174120	9195255	.	+	.	Name=Y81B9A;Note=Clone:Y81B9A,GenBank:FO080239
X	Genomic_canonical	assembly_component	10352434	10376483	.	+	.	Name=Y49A10A;Note=Clone:Y49A10A,GenBank:AL032624
X	Genomic_canonical	assembly_component	11623844	11645248	.	+	.	Name=Y71H9A;Note=Clone:Y71H9A,GenBank:AL032659
X	Genomic_canonical	assembly_component	11778913	11791327	.	+	.	Name=Y102F5A;Note=Clone:Y102F5A,GenBank:AL032629
X	Genomic_canonical	assembly_component	11875214	11922610	.	+	.	Name=Y62H9A;Note=Clone:Y62H9A,GenBank:AL032630
X	Genomic_canonical	assembly_component	13613552	13631049	.	+	.	Name=Y12A6A;Note=Clone:Y12A6A,GenBank:AL023827
X	Genomic_canonical	assembly_component	13747970	13748257	.	+	.	Name=Y6D6A;Note=Clone:Y6D6A,GenBank:AL023852
X	Genomic_canonical	assembly_component	13902144	13920848	.	+	.	Name=Y26E6A;Note=Clone:Y26E6A,GenBank:AL023830
X	Genomic_canonical	assembly_component	14367932	14397221	.	+	.	Name=Y60A9A;Note=Clone:Y60A9A,GenBank:AL110495
X	Genomic_canonical	assembly_component	14453680	14462224	.	+	.	Name=Y66C5A;Note=Clone:Y66C5A,GenBank:AL021502
X	Genomic_canonical	assembly_component	14770976	14776840	.	+	.	Name=Y16B4A;Note=Clone:Y16B4A,GenBank:AL023825
X	Genomic_canonical	assembly_component	14901312	14922579	.	+	.	Name=Y70D2A;Note=Clone:Y70D2A,GenBank:AL033513
X	Genomic_canonical	assembly_component	15307655	15355480	.	+	.	Name=Y15E3A;Note=Clone:Y15E3A,GenBank:AL132841
X	Genomic_canonical	assembly_component	15762515	15830785	.	+	.	Name=Y7A5A;Note=Clone:Y7A5A,GenBank:AL034489
X	Genomic_canonical	assembly_component	15891563	15904367	.	+	.	Name=Y67D11A;Note=Clone:Y67D11A,GenBank:AL023850
X	Genomic_canonical	assembly_component	16882893	16889453	.	+	.	Name=Y13C8A;Note=Clone:Y13C8A,GenBank:FO081334
X	Genomic_canonical	assembly_component	17252877	17270002	.	+	.	Name=Y40C7B;Note=Clone:Y40C7B,GenBank:FO080762
X	Genomic_canonical	assembly_component	17344453	17349687	.	+	.	Name=Y40C7A;Note=Clone:Y40C7A,GenBank:FO080924

## Sheet: YACs_lifted_to_VC2010.gff3
##gff-version 3
chrI_pilon	Genomic_canonical	assembly_component	1895	49520	.	+	.	Name=Y74C9A;Note=Clone:Y74C9A,GenBank:FO080986
chrI_pilon	Genomic_canonical	assembly_component	49321	109712	.	+	.	Name=Y48G1C;Note=Clone:Y48G1C,GenBank:FO081457
chrI_pilon	Genomic_canonical	assembly_component	204602	224495	.	+	.	Name=Y48G1BL;Note=Clone:Y48G1BL,GenBank:FO081620
chrI_pilon	Genomic_canonical	assembly_component	224296	259339	.	+	.	Name=Y48G1BM;Note=Clone:Y48G1BM,GenBank:FO081799
chrI_pilon	Genomic_canonical	assembly_component	259140	261893	.	+	.	Name=Y48G1BR;Note=Clone:Y48G1BR,GenBank:FO081733
chrI_pilon	Genomic_canonical	assembly_component	316257	359224	.	+	.	Name=Y48G1A;Note=Clone:Y48G1A,GenBank:FO080938
chrI_pilon	Genomic_canonical	assembly_component	397701	422446	.	+	.	Name=Y50C1A;Note=Clone:Y50C1A,GenBank:FO080420
chrI_pilon	Genomic_canonical	assembly_component	495712	534692	.	+	.	Name=Y65B4BL;Note=Clone:Y65B4BL,GenBank:FO081771
chrI_pilon	Genomic_canonical	assembly_component	533593	536458	.	+	.	Name=Y65B4BM;Note=Clone:Y65B4BM,GenBank:FO081817
chrI_pilon	Genomic_canonical	assembly_component	536259	580502	.	+	.	Name=Y65B4BR;Note=Clone:Y65B4BR,GenBank:FO081483
chrI_pilon	Genomic_canonical	assembly_component	621099	678970	.	+	.	Name=Y65B4A;Note=Clone:Y65B4A,GenBank:FO081482
chrI_pilon	Genomic_canonical	assembly_component	679704	769678	.	+	.	Name=Y18H1A;Note=Clone:Y18H1A,GenBank:FO081715
chrI_pilon	Genomic_canonical	assembly_component	800825	816894	.	+	.	Name=Y73A3A;Note=Clone:Y73A3A,GenBank:FO081714
chrI_pilon	Genomic_canonical	assembly_component	853789	967987	.	+	.	Name=Y95B8A;Note=Clone:Y95B8A,GenBank:FO081787
chrI_pilon	Genomic_canonical	assembly_component	966788	975837	.	+	.	Name=Y34D9B;Note=Clone:Y34D9B,GenBank:FO081461
chrI_pilon	Genomic_canonical	assembly_component	1037247	1087312	.	+	.	Name=Y34D9A;Note=Clone:Y34D9A,GenBank:FO080952
chrI_pilon	Genomic_canonical	assembly_component	1155357	1282828	.	+	.	Name=Y48G8AL;Note=Clone:Y48G8AL,GenBank:FO081800
chrI_pilon	Genomic_canonical	assembly_component	1279329	1326300	.	+	.	Name=Y48G8AR;Note=Clone:Y48G8AR,GenBank:FO081633
chrI_pilon	Genomic_canonical	assembly_component	1406419	1418809	.	+	.	Name=Y92H12BM;Note=Clone:Y92H12BM,GenBank:FO081828
chrI_pilon	Genomic_canonical	assembly_component	1418610	1468172	.	+	.	Name=Y92H12BR;Note=Clone:Y92H12BR,GenBank:FO081323
chrI_pilon	Genomic_canonical	assembly_component	1516057	1607868	.	+	.	Name=Y92H12A;Note=Clone:Y92H12A,GenBank:FO081415
chrI_pilon	Genomic_canonical	assembly_component	1607669	1671418	.	+	.	Name=Y73E7A;Note=Clone:Y73E7A,GenBank:FO081821
chrI_pilon	Genomic_canonical	assembly_component	1667419	1858631	.	+	.	Name=Y71G12B;Note=Clone:Y71G12B,GenBank:FO080942
chrI_pilon	Genomic_canonical	assembly_component	1899812	1938779	.	+	.	Name=Y71G12A;Note=Clone:Y71G12A,GenBank:FO081637
chrI_pilon	Genomic_canonical	assembly_component	1937980	2031027	.	+	.	Name=Y51F10;Note=Clone:Y51F10,GenBank:FO081782
chrI_pilon	Genomic_canonical	assembly_component	2030828	2089360	.	+	.	Name=Y20F4;Note=Clone:Y20F4,GenBank:FO081781
chrI_pilon	Genomic_canonical	assembly_component	2089161	2196095	.	+	.	Name=Y37E3;Note=Clone:Y37E3,GenBank:FO081769
chrI_pilon	Genomic_canonical	assembly_component	2300203	2323337	.	+	.	Name=Y39G10AL;Note=Clone:Y39G10AL,GenBank:FO081124
chrI_pilon	Genomic_canonical	assembly_component	2313338	2445829	.	+	.	Name=Y39G10AR;Note=Clone:Y39G10AR,GenBank:FO081209
chrI_pilon	Genomic_canonical	assembly_component	2495424	2508508	.	+	.	Name=Y74C10AL;Note=Clone:Y74C10AL,GenBank:FO081734
chrI_pilon	Genomic_canonical	assembly_component	2504809	2512876	.	+	.	Name=Y74C10AM;Note=Clone:Y74C10AM,GenBank:FO081824
chrI_pilon	Genomic_canonical	assembly_component	2512677	2521335	.	+	.	Name=Y74C10AR;Note=Clone:Y74C10AR,GenBank:FO081786
chrI_pilon	Genomic_canonical	assembly_component	2520336	2599760	.	+	.	Name=Y23H5B;Note=Clone:Y23H5B,GenBank:FO080963
chrI_pilon	Genomic_canonical	assembly_component	2647999	2677568	.	+	.	Name=Y23H5A;Note=Clone:Y23H5A,GenBank:FO081344
chrI_pilon	Genomic_canonical	assembly_component	2743099	2826401	.	+	.	Name=Y71F9B;Note=Clone:Y71F9B,GenBank:FO081276
chrI_pilon	Genomic_canonical	assembly_component	2901482	2970235	.	+	.	Name=Y71F9AL;Note=Clone:Y71F9AL,GenBank:FO081777
chrI_pilon	Genomic_canonical	assembly_component	2969234	2989520	.	+	.	Name=Y71F9AM;Note=Clone:Y71F9AM,GenBank:FO081820
chrI_pilon	Genomic_canonical	assembly_component	2987321	3038087	.	+	.	Name=Y71F9AR;Note=Clone:Y71F9AR,GenBank:FO081805
chrI_pilon	Genomic_canonical	assembly_component	3030388	3057250	.	+	.	Name=Y54E10BL;Note=Clone:Y54E10BL,GenBank:FO081804
chrI_pilon	Genomic_canonical	assembly_component	3057051	3111526	.	+	.	Name=Y54E10BR;Note=Clone:Y54E10BR,GenBank:FO081636
chrI_pilon	Genomic_canonical	assembly_component	3201726	3306682	.	+	.	Name=Y54E10A;Note=Clone:Y54E10A,GenBank:FO081614
chrI_pilon	Genomic_canonical	assembly_component	3306483	3312399	.	+	.	Name=Y44E3B;Note=Clone:Y44E3B,GenBank:FO081761
chrI_pilon	Genomic_canonical	assembly_component	3347599	3396086	.	+	.	Name=Y44E3A;Note=Clone:Y44E3A,GenBank:FO081760
chrI_pilon	Genomic_canonical	assembly_component	3479571	3674694	.	+	.	Name=Y47G6A;Note=Clone:Y47G6A,GenBank:FO081580
chrI_pilon	Genomic_canonical	assembly_component	3797827	3806147	.	+	.	Name=Y8G1A;Note=Clone:Y8G1A,GenBank:FO081730
chrI_pilon	Genomic_canonical	assembly_component	4336768	4375507	.	+	.	Name=Y47D9A;Note=Clone:Y47D9A,GenBank:FO080843
chrI_pilon	Genomic_canonical	assembly_component	4528869	4530010	.	+	.	Name=Y119C1C;Note=Clone:Y119C1C,GenBank:FO080837
chrI_pilon	Genomic_canonical	assembly_component	4762424	4765181	.	+	.	Name=Y119C1A;Note=Clone:Y119C1A,GenBank:FO080108
chrI_pilon	Genomic_canonical	assembly_component	5221822	5308393	.	+	.	Name=Y110A7A;Note=Clone:Y110A7A,GenBank:FO080728
chrI_pilon	Genomic_canonical	assembly_component	6044024	6072802	.	+	.	Name=Y76G2B;Note=Clone:Y76G2B,GenBank:FO080117
chrI_pilon	Genomic_canonical	assembly_component	6112237	6117700	.	+	.	Name=Y76G2A;Note=Clone:Y76G2A,GenBank:FO080116
chrI_pilon	Genomic_canonical	assembly_component	8914500	8957305	.	+	.	Name=DY3;Note=Clone:DY3,GenBank:Z96047
chrI_pilon	Genomic_canonical	assembly_component	9775564	9776262	.	+	.	Name=Y21F11A;Note=Clone:Y21F11A,GenBank:AL023833
chrI_pilon	Genomic_canonical	assembly_component	10095802	10107817	.	+	.	Name=Y106G6A;Note=Clone:Y106G6A,GenBank:AL032633
chrI_pilon	Genomic_canonical	assembly_component	10161696	10163789	.	+	.	Name=Y106G6B;Note=Clone:Y106G6B,GenBank:AL023824
chrI_pilon	Genomic_canonical	assembly_component	10217773	10231171	.	+	.	Name=Y106G6C;Note=Clone:Y106G6C,GenBank:AL023823
chrI_pilon	Genomic_canonical	assembly_component	10271490	10313186	.	+	.	Name=Y106G6D;Note=Clone:Y106G6D,GenBank:AL031629
chrI_pilon	Genomic_canonical	assembly_component	10493298	10513676	.	+	.	Name=Y106G6G;Note=Clone:Y106G6G,GenBank:AL033508
chrI_pilon	Genomic_canonical	assembly_component	10613292	10666984	.	+	.	Name=Y106G6H;Note=Clone:Y106G6H,GenBank:AL032631
chrI_pilon	Genomic_canonical	assembly_component	11040119	11065364	.	+	.	Name=Y37F4;Note=Clone:Y37F4,GenBank:FO080792
chrI_pilon	Genomic_canonical	assembly_component	11168828	11275771	.	+	.	Name=Y52B11A;Note=Clone:Y52B11A,GenBank:AL032654
chrI_pilon	Genomic_canonical	assembly_component	11307767	11333143	.	+	.	Name=Y52B11B;Note=Clone:Y52B11B,GenBank:AL032638
chrI_pilon	Genomic_canonical	assembly_component	11369028	11377014	.	+	.	Name=Y52B11C;Note=Clone:Y52B11C,GenBank:AL023846
chrI_pilon	Genomic_canonical	assembly_component	11415229	11443191	.	+	.	Name=Y53H1A;Note=Clone:Y53H1A,GenBank:AL132864
chrI_pilon	Genomic_canonical	assembly_component	11500255	11513229	.	+	.	Name=Y53H1B;Note=Clone:Y53H1B,GenBank:AL132851
chrI_pilon	Genomic_canonical	assembly_component	11591212	11631544	.	+	.	Name=Y53H1C;Note=Clone:Y53H1C,GenBank:AL117201
chrI_pilon	Genomic_canonical	assembly_component	11836588	11841701	.	+	.	Name=Y47H9A;Note=Clone:Y47H9A,GenBank:AL031636
chrI_pilon	Genomic_canonical	assembly_component	11960144	11966581	.	+	.	Name=Y47H9B;Note=Clone:Y47H9B,GenBank:AL031637
chrI_pilon	Genomic_canonical	assembly_component	12047014	12122359	.	+	.	Name=Y47H9C;Note=Clone:Y47H9C,GenBank:AL032657
chrI_pilon	Genomic_canonical	assembly_component	12168573	12247551	.	+	.	Name=Y53C10A;Note=Clone:Y53C10A,GenBank:AL033536
chrI_pilon	Genomic_canonical	assembly_component	12288640	12323867	.	+	.	Name=Y47H10A;Note=Clone:Y47H10A,GenBank:AL132848
chrI_pilon	Genomic_canonical	assembly_component	13002098	13155196	.	+	.	Name=Y18D10A;Note=Clone:Y18D10A,GenBank:AL034393
chrI_pilon	Genomic_canonical	assembly_component	13280931	13324310	.	+	.	Name=Y26D4A;Note=Clone:Y26D4A,GenBank:AL110478
chrI_pilon	Genomic_canonical	assembly_component	13574083	13602136	.	+	.	Name=Y40B1A;Note=Clone:Y40B1A,GenBank:AL034392
chrI_pilon	Genomic_canonical	assembly_component	13651611	13680923	.	+	.	Name=Y40B1B;Note=Clone:Y40B1B,GenBank:AL032636
chrI_pilon	Genomic_canonical	assembly_component	13680814	13721248	.	+	.	Name=Y48G10A;Note=Clone:Y48G10A,GenBank:AL132847
chrI_pilon	Genomic_canonical	assembly_component	13721134	13851724	.	+	.	Name=Y87G2A;Note=Clone:Y87G2A,GenBank:AL110500
chrI_pilon	Genomic_canonical	assembly_component	13851702	13866409	.	+	.	Name=Y6B3A;Note=Clone:Y6B3A,GenBank:AL032650
chrI_pilon	Genomic_canonical	assembly_component	13938446	14008150	.	+	.	Name=Y6B3B;Note=Clone:Y6B3B,GenBank:AL032655
chrI_pilon	Genomic_canonical	assembly_component	14008043	14036210	.	+	.	Name=Y37H9A;Note=Clone:Y37H9A,GenBank:AL032625
chrI_pilon	Genomic_canonical	assembly_component	14036107	14037754	.	+	.	Name=Y71A12A;Note=Clone:Y71A12A,GenBank:AL023854
chrI_pilon	Genomic_canonical	assembly_component	14107292	14247449	.	+	.	Name=Y71A12B;Note=Clone:Y71A12B,GenBank:AL132902
chrI_pilon	Genomic_canonical	assembly_component	14283076	14290791	.	+	.	Name=Y71A12C;Note=Clone:Y71A12C,GenBank:AL023853
chrI_pilon	Genomic_canonical	assembly_component	14324974	14358734	.	+	.	Name=Y63D3A;Note=Clone:Y63D3A,GenBank:AL032652
chrI_pilon	Genomic_canonical	assembly_component	14577908	14860729	.	+	.	Name=Y105E8A;Note=Clone:Y105E8A,GenBank:AL132876
chrI_pilon	Genomic_canonical	assembly_component	14860626	14940461	.	+	.	Name=Y105E8B;Note=Clone:Y105E8B,GenBank:AL132877
chrI_pilon	Genomic_canonical	assembly_component	14940357	14968130	.	+	.	Name=Y54E5A;Note=Clone:Y54E5A,GenBank:AL032643
chrI_pilon	Genomic_canonical	assembly_component	15055133	15076791	.	+	.	Name=Y54E5B;Note=Clone:Y54E5B,GenBank:AL032653
chrII_pilon	Genomic_canonical	assembly_component	224998	259329	.	+	.	Name=Y43H11AL;Note=Clone:Y43H11AL,GenBank:FO081418
chrII_pilon	Genomic_canonical	assembly_component	259130	261955	.	+	.	Name=Y43H11AR;Note=Clone:Y43H11AR,GenBank:FO080205
chrII_pilon	Genomic_canonical	assembly_component	542726	546472	.	+	.	Name=Y64C7A;Note=Clone:Y64C7A,GenBank:FO080469
chrII_pilon	Genomic_canonical	assembly_component	678142	682783	.	+	.	Name=Y39F10C;Note=Clone:Y39F10C,GenBank:FO081603
chrII_pilon	Genomic_canonical	assembly_component	719719	742340	.	+	.	Name=Y39F10B;Note=Clone:Y39F10B,GenBank:FO080443
chrII_pilon	Genomic_canonical	assembly_component	781991	792957	.	+	.	Name=Y39F10A;Note=Clone:Y39F10A,GenBank:FO080442
chrII_pilon	Genomic_canonical	assembly_component	857314	879982	.	+	.	Name=Y46B2A;Note=Clone:Y46B2A,GenBank:FO081237
chrII_pilon	Genomic_canonical	assembly_component	1189366	1221297	.	+	.	Name=Y50F7A;Note=Clone:Y50F7A,GenBank:FO081450
chrII_pilon	Genomic_canonical	assembly_component	1274065	1318378	.	+	.	Name=Y57G7A;Note=Clone:Y57G7A,GenBank:FO081412
chrII_pilon	Genomic_canonical	assembly_component	1369102	1371732	.	+	.	Name=Y51H7D;Note=Clone:Y51H7D,GenBank:FO080519
chrII_pilon	Genomic_canonical	assembly_component	1527028	1533449	.	+	.	Name=Y51H7BL;Note=Clone:Y51H7BL,GenBank:FO081554
chrII_pilon	Genomic_canonical	assembly_component	1529450	1538035	.	+	.	Name=Y51H7BM;Note=Clone:Y51H7BM,GenBank:FO081801
chrII_pilon	Genomic_canonical	assembly_component	1536836	1559226	.	+	.	Name=Y51H7BR;Note=Clone:Y51H7BR,GenBank:FO081592
chrII_pilon	Genomic_canonical	assembly_component	2217307	2236319	.	+	.	Name=Y59C2A;Note=Clone:Y59C2A,GenBank:FO080755
chrII_pilon	Genomic_canonical	assembly_component	2576074	2587351	.	+	.	Name=Y47G7C;Note=Clone:Y47G7C,GenBank:FO081098
chrII_pilon	Genomic_canonical	assembly_component	2722586	2734398	.	+	.	Name=Y47G7B;Note=Clone:Y47G7B,GenBank:FO081285
chrII_pilon	Genomic_canonical	assembly_component	2765945	2773272	.	+	.	Name=Y47G7A;Note=Clone:Y47G7A,GenBank:FO081254
chrII_pilon	Genomic_canonical	assembly_component	2823138	2823972	.	+	.	Name=Y110A2B;Note=Clone:Y110A2B,GenBank:FO081087
chrII_pilon	Genomic_canonical	assembly_component	2862213	2922220	.	+	.	Name=Y110A2AL;Note=Clone:Y110A2AL,GenBank:FO081635
chrII_pilon	Genomic_canonical	assembly_component	2922021	2937797	.	+	.	Name=Y110A2AM;Note=Clone:Y110A2AM,GenBank:FO081830
chrII_pilon	Genomic_canonical	assembly_component	2935898	2950275	.	+	.	Name=Y110A2AR;Note=Clone:Y110A2AR,GenBank:FO081831
chrII_pilon	Genomic_canonical	assembly_component	3087713	3147105	.	+	.	Name=Y25C1A;Note=Clone:Y25C1A,GenBank:FO080207
chrII_pilon	Genomic_canonical	assembly_component	3184106	3237778	.	+	.	Name=Y27F2A;Note=Clone:Y27F2A,GenBank:FO081726
chrII_pilon	Genomic_canonical	assembly_component	3360413	3368022	.	+	.	Name=Y46D2A;Note=Clone:Y46D2A,GenBank:FO081149
chrII_pilon	Genomic_canonical	assembly_component	3402812	3422381	.	+	.	Name=Y49F6C;Note=Clone:Y49F6C,GenBank:FO081148
chrII_pilon	Genomic_canonical	assembly_component	3510132	3562666	.	+	.	Name=Y49F6B;Note=Clone:Y49F6B,GenBank:FO080566
chrII_pilon	Genomic_canonical	assembly_component	3632101	3656430	.	+	.	Name=Y49F6A;Note=Clone:Y49F6A,GenBank:FO081346
chrII_pilon	Genomic_canonical	assembly_component	3833356	3850141	.	+	.	Name=Y8A9A;Note=Clone:Y8A9A,GenBank:FO081463
chrII_pilon	Genomic_canonical	assembly_component	3977196	3990041	.	+	.	Name=Y14H12B;Note=Clone:Y14H12B,GenBank:FO081452
chrII_pilon	Genomic_canonical	assembly_component	4036491	4080728	.	+	.	Name=Y14H12A;Note=Clone:Y14H12A,GenBank:FO081601
chrII_pilon	Genomic_canonical	assembly_component	4114012	4120940	.	+	.	Name=Y54C5B;Note=Clone:Y54C5B,GenBank:FO081600
chrII_pilon	Genomic_canonical	assembly_component	4199663	4206580	.	+	.	Name=Y54C5A;Note=Clone:Y54C5A,GenBank:FO081490
chrII_pilon	Genomic_canonical	assembly_component	4370340	4390653	.	+	.	Name=Y52E8A;Note=Clone:Y52E8A,GenBank:FO080259
chrII_pilon	Genomic_canonical	assembly_component	5016926	5027901	.	+	.	Name=Y38A8;Note=Clone:Y38A8,GenBank:FO081756
chrII_pilon	Genomic_canonical	assembly_component	7561822	7571400	.	+	.	Name=Y9D1A;Note=Clone:Y9D1A,GenBank:FO080996
chrII_pilon	Genomic_canonical	assembly_component	8404604	8419629	.	+	.	Name=Y1E3A;Note=Clone:Y1E3A,GenBank:AL023831
chrII_pilon	Genomic_canonical	assembly_component	9268797	9274831	.	+	.	Name=Y9C2UA;Note=Clone:Y9C2UA,GenBank:AL008881
chrII_pilon	Genomic_canonical	assembly_component	9519937	9542175	.	+	.	Name=Y51B9A;Note=Clone:Y51B9A,GenBank:AL023845
chrII_pilon	Genomic_canonical	assembly_component	9823267	9850094	.	+	.	Name=Y53C12A;Note=Clone:Y53C12A,GenBank:Z99277
chrII_pilon	Genomic_canonical	assembly_component	9849978	9851563	.	+	.	Name=Y53C12D;Note=Clone:Y53C12D,GenBank:AL033123
chrII_pilon	Genomic_canonical	assembly_component	9851457	9884862	.	+	.	Name=Y53C12B;Note=Clone:Y53C12B,GenBank:Z99278
chrII_pilon	Genomic_canonical	assembly_component	11050680	11057550	.	+	.	Name=Y19D2B;Note=Clone:Y19D2B,GenBank:AL023832
chrII_pilon	Genomic_canonical	assembly_component	11657399	11679343	.	+	.	Name=Y62F5A;Note=Clone:Y62F5A,GenBank:AL110499
chrII_pilon	Genomic_canonical	assembly_component	11955180	11969793	.	+	.	Name=Y6D1A;Note=Clone:Y6D1A,GenBank:AL032651
chrII_pilon	Genomic_canonical	assembly_component	12056060	12056389	.	+	.	Name=Y38G4A;Note=Clone:Y38G4A,GenBank:AL021179
chrII_pilon	Genomic_canonical	assembly_component	12056284	12069797	.	+	.	Name=Y17G7A;Note=Clone:Y17G7A,GenBank:AL021172
chrII_pilon	Genomic_canonical	assembly_component	12109074	12252470	.	+	.	Name=Y17G7B;Note=Clone:Y17G7B,GenBank:AL023828
chrII_pilon	Genomic_canonical	assembly_component	12252371	12277056	.	+	.	Name=Y43F11A;Note=Clone:Y43F11A,GenBank:AL117199
chrII_pilon	Genomic_canonical	assembly_component	12276957	12442987	.	+	.	Name=Y57A10A;Note=Clone:Y57A10A,GenBank:AL117195
chrII_pilon	Genomic_canonical	assembly_component	12496628	12538199	.	+	.	Name=Y57A10B;Note=Clone:Y57A10B,GenBank:AL032647
chrII_pilon	Genomic_canonical	assembly_component	12552992	12583162	.	+	.	Name=Y57A10C;Note=Clone:Y57A10C,GenBank:AL023847
chrII_pilon	Genomic_canonical	assembly_component	12711165	12823416	.	+	.	Name=Y38E10A;Note=Clone:Y38E10A,GenBank:AL110484
chrII_pilon	Genomic_canonical	assembly_component	12823317	13033284	.	+	.	Name=Y46G5A;Note=Clone:Y46G5A,GenBank:AL110485
chrII_pilon	Genomic_canonical	assembly_component	13103812	13180277	.	+	.	Name=Y38F1A;Note=Clone:Y38F1A,GenBank:AL032639
chrII_pilon	Genomic_canonical	assembly_component	13234803	13255105	.	+	.	Name=Y81G3A;Note=Clone:Y81G3A,GenBank:AL034543
chrII_pilon	Genomic_canonical	assembly_component	13411290	13576886	.	+	.	Name=Y48C3A;Note=Clone:Y48C3A,GenBank:AL117203
chrII_pilon	Genomic_canonical	assembly_component	13576787	13597800	.	+	.	Name=Y48E1C;Note=Clone:Y48E1C,GenBank:Z93394
chrII_pilon	Genomic_canonical	assembly_component	13680760	13772137	.	+	.	Name=Y48E1B;Note=Clone:Y48E1B,GenBank:Z93393
chrII_pilon	Genomic_canonical	assembly_component	13839705	13857280	.	+	.	Name=Y48E1A;Note=Clone:Y48E1A,GenBank:Z93392
chrII_pilon	Genomic_canonical	assembly_component	13857181	13899318	.	+	.	Name=Y54G9A;Note=Clone:Y54G9A,GenBank:AL032648
chrII_pilon	Genomic_canonical	assembly_component	14028630	14072786	.	+	.	Name=Y51H1A;Note=Clone:Y51H1A,GenBank:AL032644
chrII_pilon	Genomic_canonical	assembly_component	14143510	14183680	.	+	.	Name=Y39G8B;Note=Clone:Y39G8B,GenBank:AL110482
chrII_pilon	Genomic_canonical	assembly_component	14253009	14293064	.	+	.	Name=Y39G8C;Note=Clone:Y39G8C,GenBank:AL032634
chrII_pilon	Genomic_canonical	assembly_component	14339513	14440805	.	+	.	Name=Y48B6A;Note=Clone:Y48B6A,GenBank:AL110490
chrII_pilon	Genomic_canonical	assembly_component	14440700	14578320	.	+	.	Name=Y54G11A;Note=Clone:Y54G11A,GenBank:AL034488
chrII_pilon	Genomic_canonical	assembly_component	14682034	14691858	.	+	.	Name=Y54G11B;Note=Clone:Y54G11B,GenBank:AL021181
chrII_pilon	Genomic_canonical	assembly_component	14965469	15028084	.	+	.	Name=Y54E2A;Note=Clone:Y54E2A,GenBank:AL032646
chrII_pilon	Genomic_canonical	assembly_component	15098687	15122722	.	+	.	Name=Y53F4A;Note=Clone:Y53F4A,GenBank:AL110494
chrII_pilon	Genomic_canonical	assembly_component	15178675	15422222	.	+	.	Name=Y53F4B;Note=Clone:Y53F4B,GenBank:AL132949
chrII_pilon	Genomic_canonical	assembly_component	15421807	15432571	.	+	.	Name=Y1H11;Note=Clone:Y1H11,GenBank:FO081778
chrII_pilon	Genomic_canonical	assembly_component	15432372	15451938	.	+	.	Name=Y46E12BR;Note=Clone:Y46E12BR,GenBank:FO081779
chrII_pilon	Genomic_canonical	assembly_component	15451739	15461863	.	+	.	Name=Y46E12BM;Note=Clone:Y46E12BM,GenBank:FO081797
chrII_pilon	Genomic_canonical	assembly_component	15461664	15507817	.	+	.	Name=Y46E12BL;Note=Clone:Y46E12BL,GenBank:FO080087
chrIII_pilon	Genomic_canonical	assembly_component	225965	353481	.	+	.	Name=Y50D7A;Note=Clone:Y50D7A,GenBank:FO081772
chrIII_pilon	Genomic_canonical	assembly_component	412961	419790	.	+	.	Name=Y55B1BL;Note=Clone:Y55B1BL,GenBank:FO081622
chrIII_pilon	Genomic_canonical	assembly_component	419091	441723	.	+	.	Name=Y55B1BM;Note=Clone:Y55B1BM,GenBank:FO081812
chrIII_pilon	Genomic_canonical	assembly_component	441524	498629	.	+	.	Name=Y55B1BR;Note=Clone:Y55B1BR,GenBank:FO081109
chrIII_pilon	Genomic_canonical	assembly_component	599914	613658	.	+	.	Name=Y55B1AL;Note=Clone:Y55B1AL,GenBank:FO080183
chrIII_pilon	Genomic_canonical	assembly_component	608659	622338	.	+	.	Name=Y55B1AM;Note=Clone:Y55B1AM,GenBank:FO081811
chrIII_pilon	Genomic_canonical	assembly_component	613539	632768	.	+	.	Name=Y55B1AR;Note=Clone:Y55B1AR,GenBank:FO081736
chrIII_pilon	Genomic_canonical	assembly_component	885231	893682	.	+	.	Name=Y6D11A;Note=Clone:Y6D11A,GenBank:FO081578
chrIII_pilon	Genomic_canonical	assembly_component	949763	976937	.	+	.	Name=Y7G10A;Note=Clone:Y7G10A,GenBank:FO081213
chrIII_pilon	Genomic_canonical	assembly_component	1047793	1083927	.	+	.	Name=Y34F4;Note=Clone:Y34F4,GenBank:FO081063
chrIII_pilon	Genomic_canonical	assembly_component	1115253	1141584	.	+	.	Name=Y92C3B;Note=Clone:Y92C3B,GenBank:FO080242
chrIII_pilon	Genomic_canonical	assembly_component	1172623	1213263	.	+	.	Name=Y71D11A;Note=Clone:Y71D11A,GenBank:FO081503
chrIII_pilon	Genomic_canonical	assembly_component	1213064	1237268	.	+	.	Name=Y92C3A;Note=Clone:Y92C3A,GenBank:FO081819
chrIII_pilon	Genomic_canonical	assembly_component	1233770	1329851	.	+	.	Name=Y119D3B;Note=Clone:Y119D3B,GenBank:FO081827
chrIII_pilon	Genomic_canonical	assembly_component	1385228	1435683	.	+	.	Name=Y82E9BL;Note=Clone:Y82E9BL,GenBank:FO081825
chrIII_pilon	Genomic_canonical	assembly_component	1435484	1576070	.	+	.	Name=Y82E9BR;Note=Clone:Y82E9BR,GenBank:FO081643
chrIII_pilon	Genomic_canonical	assembly_component	1614197	1658884	.	+	.	Name=Y67D2;Note=Clone:Y67D2,GenBank:FO081642
chrIII_pilon	Genomic_canonical	assembly_component	1658085	1747484	.	+	.	Name=Y22D7AL;Note=Clone:Y22D7AL,GenBank:FO081783
chrIII_pilon	Genomic_canonical	assembly_component	1747285	1825636	.	+	.	Name=Y22D7AR;Note=Clone:Y22D7AR,GenBank:FO081784
chrIII_pilon	Genomic_canonical	assembly_component	1825437	1857455	.	+	.	Name=Y46E12A;Note=Clone:Y46E12A,GenBank:FO081785
chrIII_pilon	Genomic_canonical	assembly_component	1854256	1928773	.	+	.	Name=Y39A3CL;Note=Clone:Y39A3CL,GenBank:FO081789
chrIII_pilon	Genomic_canonical	assembly_component	1926074	1929071	.	+	.	Name=Y39A3CM;Note=Clone:Y39A3CM,GenBank:FO081790
chrIII_pilon	Genomic_canonical	assembly_component	1928872	1965693	.	+	.	Name=Y39A3CR;Note=Clone:Y39A3CR,GenBank:FO080225
chrIII_pilon	Genomic_canonical	assembly_component	2063176	2098644	.	+	.	Name=Y39A3B;Note=Clone:Y39A3B,GenBank:FO081640
chrIII_pilon	Genomic_canonical	assembly_component	2137055	2164328	.	+	.	Name=Y39A3A;Note=Clone:Y39A3A,GenBank:FO081639
chrIII_pilon	Genomic_canonical	assembly_component	2164827	2307156	.	+	.	Name=Y48G9A;Note=Clone:Y48G9A,GenBank:FO080824
chrIII_pilon	Genomic_canonical	assembly_component	2364927	2368203	.	+	.	Name=Y54F10BL;Note=Clone:Y54F10BL,GenBank:FO081737
chrIII_pilon	Genomic_canonical	assembly_component	2368004	2454204	.	+	.	Name=Y54F10BM;Note=Clone:Y54F10BM,GenBank:FO081808
chrIII_pilon	Genomic_canonical	assembly_component	2453705	2457635	.	+	.	Name=Y54F10BR;Note=Clone:Y54F10BR,GenBank:FO081522
chrIII_pilon	Genomic_canonical	assembly_component	2581060	2602590	.	+	.	Name=Y54F10AL;Note=Clone:Y54F10AL,GenBank:FO081031
chrIII_pilon	Genomic_canonical	assembly_component	2685718	2697997	.	+	.	Name=Y54F10AR;Note=Clone:Y54F10AR,GenBank:FO081807
chrIII_pilon	Genomic_canonical	assembly_component	2697798	2756317	.	+	.	Name=Y71H2B;Note=Clone:Y71H2B,GenBank:FO081557
chrIII_pilon	Genomic_canonical	assembly_component	2791461	2811019	.	+	.	Name=Y71H2AL;Note=Clone:Y71H2AL,GenBank:FO081556
chrIII_pilon	Genomic_canonical	assembly_component	2810820	2954610	.	+	.	Name=Y71H2AM;Note=Clone:Y71H2AM,GenBank:FO081822
chrIII_pilon	Genomic_canonical	assembly_component	2954111	2962914	.	+	.	Name=Y71H2AR;Note=Clone:Y71H2AR,GenBank:FO081570
chrIII_pilon	Genomic_canonical	assembly_component	3089793	3177007	.	+	.	Name=Y55D5A;Note=Clone:Y55D5A,GenBank:FO081525
chrIII_pilon	Genomic_canonical	assembly_component	3222188	3253822	.	+	.	Name=Y53G8B;Note=Clone:Y53G8B,GenBank:FO080851
chrIII_pilon	Genomic_canonical	assembly_component	3359072	3375531	.	+	.	Name=Y53G8AL;Note=Clone:Y53G8AL,GenBank:FO081540
chrIII_pilon	Genomic_canonical	assembly_component	3375332	3403654	.	+	.	Name=Y53G8AM;Note=Clone:Y53G8AM,GenBank:FO081802
chrIII_pilon	Genomic_canonical	assembly_component	3403455	3472459	.	+	.	Name=Y53G8AR;Note=Clone:Y53G8AR,GenBank:FO081803
chrIII_pilon	Genomic_canonical	assembly_component	4117118	4123278	.	+	.	Name=Y1A5A;Note=Clone:Y1A5A,GenBank:AL021177
chrIII_pilon	Genomic_canonical	assembly_component	4379148	4385293	.	+	.	Name=Y44F5A;Note=Clone:Y44F5A,GenBank:AL021180
chrIII_pilon	Genomic_canonical	assembly_component	5278520	5300719	.	+	.	Name=Y54H5A;Note=Clone:Y54H5A,GenBank:FO081201
chrIII_pilon	Genomic_canonical	assembly_component	5487400	5581530	.	+	.	Name=Y32H12A;Note=Clone:Y32H12A,GenBank:FO081763
chrIII_pilon	Genomic_canonical	assembly_component	5948549	5966924	.	+	.	Name=Y37B11A;Note=Clone:Y37B11A,GenBank:FO080137
chrIII_pilon	Genomic_canonical	assembly_component	6303638	6334217	.	+	.	Name=Y42G9A;Note=Clone:Y42G9A,GenBank:FO081373
chrIII_pilon	Genomic_canonical	assembly_component	6792150	6802020	.	+	.	Name=Y40D12A;Note=Clone:Y40D12A,GenBank:FO080525
chrIII_pilon	Genomic_canonical	assembly_component	6907735	6918786	.	+	.	Name=Y102E9;Note=Clone:Y102E9,GenBank:FO081313
chrIII_pilon	Genomic_canonical	assembly_component	10495829	10543176	.	+	.	Name=Y70G10A;Note=Clone:Y70G10A,GenBank:AL032660
chrIII_pilon	Genomic_canonical	assembly_component	10856808	10893463	.	+	.	Name=Y45F3A;Note=Clone:Y45F3A,GenBank:AL032621
chrIII_pilon	Genomic_canonical	assembly_component	10893358	11004768	.	+	.	Name=Y39A1A;Note=Clone:Y39A1A,GenBank:AL031633
chrIII_pilon	Genomic_canonical	assembly_component	11057817	11096342	.	+	.	Name=Y39A1B;Note=Clone:Y39A1B,GenBank:AL021482
chrIII_pilon	Genomic_canonical	assembly_component	11148255	11166400	.	+	.	Name=Y39A1C;Note=Clone:Y39A1C,GenBank:AL023839
chrIII_pilon	Genomic_canonical	assembly_component	11237096	11245555	.	+	.	Name=Y52D3;Note=Clone:Y52D3,GenBank:Z99276
chrIII_pilon	Genomic_canonical	assembly_component	11245450	11252750	.	+	.	Name=Y48A6A;Note=Clone:Y48A6A,GenBank:AL023843
chrIII_pilon	Genomic_canonical	assembly_component	11288079	11365652	.	+	.	Name=Y48A6B;Note=Clone:Y48A6B,GenBank:AL023844
chrIII_pilon	Genomic_canonical	assembly_component	11400951	11436687	.	+	.	Name=Y48A6C;Note=Clone:Y48A6C,GenBank:AL032642
chrIII_pilon	Genomic_canonical	assembly_component	11436584	11636403	.	+	.	Name=Y47D3A;Note=Clone:Y47D3A,GenBank:AL117202
chrIII_pilon	Genomic_canonical	assembly_component	11676275	11776447	.	+	.	Name=Y47D3B;Note=Clone:Y47D3B,GenBank:AL031635
chrIII_pilon	Genomic_canonical	assembly_component	11776342	11792193	.	+	.	Name=Y66A7AL;Note=Clone:Y66A7AL,GenBank:AL590343
chrIII_pilon	Genomic_canonical	assembly_component	11792087	11914942	.	+	.	Name=Y66D12A;Note=Clone:Y66D12A,GenBank:AL161712
chrIII_pilon	Genomic_canonical	assembly_component	11914837	11942396	.	+	.	Name=Y66A7AR;Note=Clone:Y66A7AR,GenBank:AL590342
chrIII_pilon	Genomic_canonical	assembly_component	11942306	12070593	.	+	.	Name=Y41C4A;Note=Clone:Y41C4A,GenBank:AL032627
chrIII_pilon	Genomic_canonical	assembly_component	12137608	12306968	.	+	.	Name=Y56A3A;Note=Clone:Y56A3A,GenBank:AL132860
chrIII_pilon	Genomic_canonical	assembly_component	12306869	12373011	.	+	.	Name=Y79H2A;Note=Clone:Y79H2A,GenBank:AL110501
chrIII_pilon	Genomic_canonical	assembly_component	12372909	12670870	.	+	.	Name=Y75B8A;Note=Clone:Y75B8A,GenBank:AL033514
chrIII_pilon	Genomic_canonical	assembly_component	12670764	12796599	.	+	.	Name=Y49E10;Note=Clone:Y49E10,GenBank:Z98866
chrIII_pilon	Genomic_canonical	assembly_component	12796495	13054526	.	+	.	Name=Y111B2A;Note=Clone:Y111B2A,GenBank:AL132904
chrIII_pilon	Genomic_canonical	assembly_component	13120851	13253788	.	+	.	Name=Y37D8A;Note=Clone:Y37D8A,GenBank:AL032626
chrIII_pilon	Genomic_canonical	assembly_component	13253683	13279891	.	+	.	Name=Y39E4A;Note=Clone:Y39E4A,GenBank:AL021480
chrIII_pilon	Genomic_canonical	assembly_component	13372346	13538987	.	+	.	Name=Y39E4B;Note=Clone:Y39E4B,GenBank:AL110487
chrIII_pilon	Genomic_canonical	assembly_component	13538871	13562798	.	+	.	Name=Y43F4A;Note=Clone:Y43F4A,GenBank:Z99271
chrIII_pilon	Genomic_canonical	assembly_component	13602870	13634112	.	+	.	Name=Y43F4B;Note=Clone:Y43F4B,GenBank:AL021481
chrIII_pilon	Genomic_canonical	assembly_component	13676626	13678083	.	+	.	Name=Y43F4C;Note=Clone:Y43F4C,GenBank:Z99272
chrIII_pilon	Genomic_canonical	assembly_component	13758639	13779490	.	+	.	Name=Y76A2A;Note=Clone:Y76A2A,GenBank:AL032665
chrIII_pilon	Genomic_canonical	assembly_component	13835812	13871685	.	+	.	Name=Y76A2B;Note=Clone:Y76A2B,GenBank:AL032658
chrIV_pilon	Genomic_canonical	assembly_component	5642	52718	.	+	.	Name=Y38C1AB;Note=Clone:Y38C1AB,GenBank:FO080984
chrIV_pilon	Genomic_canonical	assembly_component	152437	231320	.	+	.	Name=Y38C1AA;Note=Clone:Y38C1AA,GenBank:FO081257
chrIV_pilon	Genomic_canonical	assembly_component	355218	389339	.	+	.	Name=Y66H1B;Note=Clone:Y66H1B,GenBank:FO081175
chrIV_pilon	Genomic_canonical	assembly_component	431995	460406	.	+	.	Name=Y66H1A;Note=Clone:Y66H1A,GenBank:FO081659
chrIV_pilon	Genomic_canonical	assembly_component	504594	509565	.	+	.	Name=Y65D7A;Note=Clone:Y65D7A,GenBank:FO081651
chrIV_pilon	Genomic_canonical	assembly_component	695886	767809	.	+	.	Name=Y55F3C;Note=Clone:Y55F3C,GenBank:FO081352
chrIV_pilon	Genomic_canonical	assembly_component	805984	831760	.	+	.	Name=Y55F3BL;Note=Clone:Y55F3BL,GenBank:FO081485
chrIV_pilon	Genomic_canonical	assembly_component	831561	834042	.	+	.	Name=Y55F3BM;Note=Clone:Y55F3BM,GenBank:FO081814
chrIV_pilon	Genomic_canonical	assembly_component	833843	889140	.	+	.	Name=Y55F3BR;Note=Clone:Y55F3BR,GenBank:FO080861
chrIV_pilon	Genomic_canonical	assembly_component	957253	990070	.	+	.	Name=Y55F3AL;Note=Clone:Y55F3AL,GenBank:FO081507
chrIV_pilon	Genomic_canonical	assembly_component	986271	1093969	.	+	.	Name=Y55F3AM;Note=Clone:Y55F3AM,GenBank:FO081813
chrIV_pilon	Genomic_canonical	assembly_component	1092770	1109891	.	+	.	Name=Y55F3AR;Note=Clone:Y55F3AR,GenBank:FO080854
chrIV_pilon	Genomic_canonical	assembly_component	1184880	1211910	.	+	.	Name=Y104H12D;Note=Clone:Y104H12D,GenBank:FO080911
chrIV_pilon	Genomic_canonical	assembly_component	1240430	1241795	.	+	.	Name=Y104H12C;Note=Clone:Y104H12C,GenBank:FO081324
chrIV_pilon	Genomic_canonical	assembly_component	1290935	1304599	.	+	.	Name=Y104H12BL;Note=Clone:Y104H12BL,GenBank:FO080471
chrIV_pilon	Genomic_canonical	assembly_component	1304400	1316999	.	+	.	Name=Y104H12BR;Note=Clone:Y104H12BR,GenBank:FO081459
chrIV_pilon	Genomic_canonical	assembly_component	1395863	1403787	.	+	.	Name=Y104H12A;Note=Clone:Y104H12A,GenBank:FO080407
chrIV_pilon	Genomic_canonical	assembly_component	1403588	1525373	.	+	.	Name=Y77E11A;Note=Clone:Y77E11A,GenBank:FO081581
chrIV_pilon	Genomic_canonical	assembly_component	1571864	1709874	.	+	.	Name=Y41D4B;Note=Clone:Y41D4B,GenBank:FO080782
chrIV_pilon	Genomic_canonical	assembly_component	1743147	1801214	.	+	.	Name=Y41D4A;Note=Clone:Y41D4A,GenBank:FO081611
chrIV_pilon	Genomic_canonical	assembly_component	1801015	1849909	.	+	.	Name=Y38C1BA;Note=Clone:Y38C1BA,GenBank:FO081597
chrIV_pilon	Genomic_canonical	assembly_component	1933670	1939836	.	+	.	Name=Y48A5B;Note=Clone:Y48A5B,GenBank:FO081440
chrIV_pilon	Genomic_canonical	assembly_component	1980095	1989732	.	+	.	Name=Y48A5A;Note=Clone:Y48A5A,GenBank:FO081439
chrIV_pilon	Genomic_canonical	assembly_component	1989533	2068473	.	+	.	Name=Y76B12C;Note=Clone:Y76B12C,GenBank:FO081666
chrIV_pilon	Genomic_canonical	assembly_component	2156238	2169066	.	+	.	Name=Y76B12A;Note=Clone:Y76B12A,GenBank:FO080635
chrIV_pilon	Genomic_canonical	assembly_component	2200598	2207420	.	+	.	Name=Y71G10AL;Note=Clone:Y71G10AL,GenBank:FO080950
chrIV_pilon	Genomic_canonical	assembly_component	2206021	2235548	.	+	.	Name=Y71G10AR;Note=Clone:Y71G10AR,GenBank:FO081703
chrIV_pilon	Genomic_canonical	assembly_component	2315258	2354962	.	+	.	Name=Y38F2AL;Note=Clone:Y38F2AL,GenBank:FO080811
chrIV_pilon	Genomic_canonical	assembly_component	2354763	2454778	.	+	.	Name=Y38F2AR;Note=Clone:Y38F2AR,GenBank:FO080872
chrIV_pilon	Genomic_canonical	assembly_component	2502173	2509699	.	+	.	Name=Y69A2AL;Note=Clone:Y69A2AL,GenBank:FO080654
chrIV_pilon	Genomic_canonical	assembly_component	2509500	2698769	.	+	.	Name=Y69A2AR;Note=Clone:Y69A2AR,GenBank:FO081818
chrIV_pilon	Genomic_canonical	assembly_component	2698570	2776909	.	+	.	Name=Y94H6A;Note=Clone:Y94H6A,GenBank:FO081810
chrIV_pilon	Genomic_canonical	assembly_component	2776710	3074236	.	+	.	Name=Y54G2A;Note=Clone:Y54G2A,GenBank:FO081809
chrIV_pilon	Genomic_canonical	assembly_component	3070043	3173503	.	+	.	Name=Y67D8C;Note=Clone:Y67D8C,GenBank:FO081744
chrIV_pilon	Genomic_canonical	assembly_component	3207355	3241186	.	+	.	Name=Y67D8B;Note=Clone:Y67D8B,GenBank:FO081658
chrIV_pilon	Genomic_canonical	assembly_component	3279348	3317525	.	+	.	Name=Y67D8A;Note=Clone:Y67D8A,GenBank:FO081657
chrIV_pilon	Genomic_canonical	assembly_component	3375028	3381843	.	+	.	Name=Y55H10B;Note=Clone:Y55H10B,GenBank:FO081371
chrIV_pilon	Genomic_canonical	assembly_component	3415982	3440407	.	+	.	Name=Y55H10A;Note=Clone:Y55H10A,GenBank:FO080231
chrIV_pilon	Genomic_canonical	assembly_component	3576409	3592367	.	+	.	Name=Y37E11C;Note=Clone:Y37E11C,GenBank:FO080482
chrIV_pilon	Genomic_canonical	assembly_component	3640065	3668784	.	+	.	Name=Y37E11B;Note=Clone:Y37E11B,GenBank:FO080119
chrIV_pilon	Genomic_canonical	assembly_component	3714326	3782453	.	+	.	Name=Y37E11AL;Note=Clone:Y37E11AL,GenBank:FO080976
chrIV_pilon	Genomic_canonical	assembly_component	3778454	3798963	.	+	.	Name=Y37E11AM;Note=Clone:Y37E11AM,GenBank:FO081788
chrIV_pilon	Genomic_canonical	assembly_component	3797964	3829229	.	+	.	Name=Y37E11AR;Note=Clone:Y37E11AR,GenBank:FO081773
chrIV_pilon	Genomic_canonical	assembly_component	3993554	4024971	.	+	.	Name=Y46C8AL;Note=Clone:Y46C8AL,GenBank:FO081491
chrIV_pilon	Genomic_canonical	assembly_component	4024772	4026689	.	+	.	Name=Y46C8AM;Note=Clone:Y46C8AM,GenBank:FO081796
chrIV_pilon	Genomic_canonical	assembly_component	4026290	4035196	.	+	.	Name=Y46C8AR;Note=Clone:Y46C8AR,GenBank:FO081404
chrIV_pilon	Genomic_canonical	assembly_component	4380458	4385000	.	+	.	Name=Y24D9B;Note=Clone:Y24D9B,GenBank:FO081152
chrIV_pilon	Genomic_canonical	assembly_component	4439789	4481873	.	+	.	Name=Y24D9A;Note=Clone:Y24D9A,GenBank:FO081479
chrIV_pilon	Genomic_canonical	assembly_component	4481674	4486902	.	+	.	Name=Y68G5A;Note=Clone:Y68G5A,GenBank:FO081676
chrIV_pilon	Genomic_canonical	assembly_component	4815224	4834843	.	+	.	Name=Y17G9B;Note=Clone:Y17G9B,GenBank:FO081040
chrIV_pilon	Genomic_canonical	assembly_component	4900658	4941992	.	+	.	Name=Y17G9A;Note=Clone:Y17G9A,GenBank:FO081530
chrIV_pilon	Genomic_canonical	assembly_component	4975799	5040863	.	+	.	Name=Y9C9A;Note=Clone:Y9C9A,GenBank:FO081038
chrIV_pilon	Genomic_canonical	assembly_component	5271341	5295671	.	+	.	Name=Y59E9AL;Note=Clone:Y59E9AL,GenBank:FO081766
chrIV_pilon	Genomic_canonical	assembly_component	5295172	5315894	.	+	.	Name=Y59E9AR;Note=Clone:Y59E9AR,GenBank:FO081311
chrIV_pilon	Genomic_canonical	assembly_component	5383151	5422341	.	+	.	Name=Y4C6B;Note=Clone:Y4C6B,GenBank:FO081369
chrIV_pilon	Genomic_canonical	assembly_component	5492192	5528041	.	+	.	Name=Y4C6A;Note=Clone:Y4C6A,GenBank:FO081780
chrIV_pilon	Genomic_canonical	assembly_component	5526842	5540732	.	+	.	Name=Y52D5A;Note=Clone:Y52D5A,GenBank:FO081728
chrIV_pilon	Genomic_canonical	assembly_component	5969910	5970360	.	+	.	Name=Y44C4A;Note=Clone:Y44C4A,GenBank:FO081523
chrIV_pilon	Genomic_canonical	assembly_component	6353904	6572224	.	+	.	Name=Y73B6BL;Note=Clone:Y73B6BL,GenBank:FO081731
chrIV_pilon	Genomic_canonical	assembly_component	6572025	6583983	.	+	.	Name=Y73B6BR;Note=Clone:Y73B6BR,GenBank:FO080266
chrIV_pilon	Genomic_canonical	assembly_component	7080779	7091691	.	+	.	Name=Y43B11AL;Note=Clone:Y43B11AL,GenBank:FO080397
chrIV_pilon	Genomic_canonical	assembly_component	7091392	7094505	.	+	.	Name=Y43B11AM;Note=Clone:Y43B11AM,GenBank:FO081793
chrIV_pilon	Genomic_canonical	assembly_component	7094306	7110075	.	+	.	Name=Y43B11AR;Note=Clone:Y43B11AR,GenBank:FO081794
chrIV_pilon	Genomic_canonical	assembly_component	7349971	7395840	.	+	.	Name=Y40C5A;Note=Clone:Y40C5A,GenBank:FO081374
chrIV_pilon	Genomic_canonical	assembly_component	8020622	8045905	.	+	.	Name=Y42H9B;Note=Clone:Y42H9B,GenBank:FO080677
chrIV_pilon	Genomic_canonical	assembly_component	8120410	8134009	.	+	.	Name=Y42H9AL;Note=Clone:Y42H9AL,GenBank:FO080615
chrIV_pilon	Genomic_canonical	assembly_component	8133810	8149724	.	+	.	Name=Y42H9AR;Note=Clone:Y42H9AR,GenBank:FO081376
chrIV_pilon	Genomic_canonical	assembly_component	8584160	8597706	.	+	.	Name=Y59H11AL;Note=Clone:Y59H11AL,GenBank:FO080479
chrIV_pilon	Genomic_canonical	assembly_component	8623713	8647553	.	+	.	Name=Y59H11AR;Note=Clone:Y59H11AR,GenBank:FO081372
chrIV_pilon	Genomic_canonical	assembly_component	9286567	9343904	.	+	.	Name=Y11D7A;Note=Clone:Y11D7A,GenBank:AL032632
chrIV_pilon	Genomic_canonical	assembly_component	10328969	10346594	.	+	.	Name=Y43C5A;Note=Clone:Y43C5A,GenBank:AL023838
chrIV_pilon	Genomic_canonical	assembly_component	10401767	10424343	.	+	.	Name=Y43C5B;Note=Clone:Y43C5B,GenBank:AL023841
chrIV_pilon	Genomic_canonical	assembly_component	11013414	11068548	.	+	.	Name=Y69E1A;Note=Clone:Y69E1A,GenBank:AL034365
chrIV_pilon	Genomic_canonical	assembly_component	11068445	11090353	.	+	.	Name=Y43E12A;Note=Clone:Y43E12A,GenBank:AL021176
chrIV_pilon	Genomic_canonical	assembly_component	11727670	11746400	.	+	.	Name=Y24F12A;Note=Clone:Y24F12A,GenBank:AL110480
chrIV_pilon	Genomic_canonical	assembly_component	12146748	12158987	.	+	.	Name=Y64F11A;Note=Clone:Y64F11A,GenBank:AL023848
chrIV_pilon	Genomic_canonical	assembly_component	12158888	12161400	.	+	.	Name=Y40D7A;Note=Clone:Y40D7A,GenBank:AL023840
chrIV_pilon	Genomic_canonical	assembly_component	12362306	12398237	.	+	.	Name=Y39C12A;Note=Clone:Y39C12A,GenBank:AL132859
chrIV_pilon	Genomic_canonical	assembly_component	12464699	12464985	.	+	.	Name=Y39C12B;Note=Clone:Y39C12B,GenBank:AL110489
chrIV_pilon	Genomic_canonical	assembly_component	12748618	12765583	.	+	.	Name=Y55D9A;Note=Clone:Y55D9A,GenBank:AL032649
chrIV_pilon	Genomic_canonical	assembly_component	13445689	13503434	.	+	.	Name=Y67H2A;Note=Clone:Y67H2A,GenBank:AL132951
chrIV_pilon	Genomic_canonical	assembly_component	13539108	13599058	.	+	.	Name=Y62E10A;Note=Clone:Y62E10A,GenBank:AL132865
chrIV_pilon	Genomic_canonical	assembly_component	13637657	13672732	.	+	.	Name=Y38H8A;Note=Clone:Y38H8A,GenBank:AL021483
chrIV_pilon	Genomic_canonical	assembly_component	13672627	13698970	.	+	.	Name=Y45F10A;Note=Clone:Y45F10A,GenBank:AL021488
chrIV_pilon	Genomic_canonical	assembly_component	13738529	13791121	.	+	.	Name=Y45F10B;Note=Clone:Y45F10B,GenBank:AL021487
chrIV_pilon	Genomic_canonical	assembly_component	13836593	13855398	.	+	.	Name=Y45F10C;Note=Clone:Y45F10C,GenBank:Z99273
chrIV_pilon	Genomic_canonical	assembly_component	13943896	14003465	.	+	.	Name=Y45F10D;Note=Clone:Y45F10D,GenBank:AL021492
chrIV_pilon	Genomic_canonical	assembly_component	14078263	14127494	.	+	.	Name=Y37A1A;Note=Clone:Y37A1A,GenBank:Z99270
chrIV_pilon	Genomic_canonical	assembly_component	14163597	14271823	.	+	.	Name=Y37A1B;Note=Clone:Y37A1B,GenBank:AL023835
chrIV_pilon	Genomic_canonical	assembly_component	14314477	14316864	.	+	.	Name=Y37A1C;Note=Clone:Y37A1C,GenBank:AL021476
chrIV_pilon	Genomic_canonical	assembly_component	14432439	14519868	.	+	.	Name=Y64G10A;Note=Clone:Y64G10A,GenBank:AL110498
chrIV_pilon	Genomic_canonical	assembly_component	14519765	14601811	.	+	.	Name=Y67A10A;Note=Clone:Y67A10A,GenBank:AL117206
chrIV_pilon	Genomic_canonical	assembly_component	14670785	14672582	.	+	.	Name=Y67A10B;Note=Clone:Y67A10B,GenBank:AL023849
chrIV_pilon	Genomic_canonical	assembly_component	14672482	14719631	.	+	.	Name=Y57G11A;Note=Clone:Y57G11A,GenBank:Z99279
chrIV_pilon	Genomic_canonical	assembly_component	14752384	14801272	.	+	.	Name=Y57G11B;Note=Clone:Y57G11B,GenBank:Z99280
chrIV_pilon	Genomic_canonical	assembly_component	14839290	15172196	.	+	.	Name=Y57G11C;Note=Clone:Y57G11C,GenBank:Z99281
chrIV_pilon	Genomic_canonical	assembly_component	15172093	15334524	.	+	.	Name=Y41E3;Note=Clone:Y41E3,GenBank:Z95559
chrIV_pilon	Genomic_canonical	assembly_component	15373698	15461082	.	+	.	Name=Y40H7A;Note=Clone:Y40H7A,GenBank:AL033510
chrIV_pilon	Genomic_canonical	assembly_component	15460977	15782698	.	+	.	Name=Y73F8A;Note=Clone:Y73F8A,GenBank:AL132862
chrIV_pilon	Genomic_canonical	assembly_component	15782577	16098514	.	+	.	Name=Y105C5A;Note=Clone:Y105C5A,GenBank:AL117193
chrIV_pilon	Genomic_canonical	assembly_component	16098411	16434140	.	+	.	Name=Y105C5B;Note=Clone:Y105C5B,GenBank:AL110479
chrIV_pilon	Genomic_canonical	assembly_component	16434040	16452538	.	+	.	Name=Y7A9A;Note=Clone:Y7A9A,GenBank:Z99284
chrIV_pilon	Genomic_canonical	assembly_component	16490885	16497629	.	+	.	Name=Y7A9B;Note=Clone:Y7A9B,GenBank:Z99285
chrIV_pilon	Genomic_canonical	assembly_component	16531297	16558118	.	+	.	Name=Y7A9C;Note=Clone:Y7A9C,GenBank:Z99286
chrIV_pilon	Genomic_canonical	assembly_component	16625594	16642749	.	+	.	Name=Y7A9D;Note=Clone:Y7A9D,GenBank:Z99287
chrIV_pilon	Genomic_canonical	assembly_component	16642649	16667563	.	+	.	Name=Y65A5A;Note=Clone:Y65A5A,GenBank:Z92864
chrIV_pilon	Genomic_canonical	assembly_component	16667463	16701134	.	+	.	Name=Y10G11A;Note=Clone:Y10G11A,GenBank:AL161711
chrIV_pilon	Genomic_canonical	assembly_component	16722237	16992039	.	+	.	Name=Y51H4A;Note=Clone:Y51H4A,GenBank:AL132952
chrIV_pilon	Genomic_canonical	assembly_component	16991934	17058883	.	+	.	Name=Y43D4A;Note=Clone:Y43D4A,GenBank:AL132846
chrIV_pilon	Genomic_canonical	assembly_component	17058778	17113477	.	+	.	Name=Y116A8A;Note=Clone:Y116A8A,GenBank:AL117205
chrIV_pilon	Genomic_canonical	assembly_component	17158313	17421397	.	+	.	Name=Y116A8C;Note=Clone:Y116A8C,GenBank:AL117204
chrIV_pilon	Genomic_canonical	assembly_component	17464138	17493482	.	+	.	Name=Y116A8B;Note=Clone:Y116A8B,GenBank:AL021469
chrV_pilon	Genomic_canonical	assembly_component	54722	74089	.	+	.	Name=Y38C9B;Note=Clone:Y38C9B,GenBank:FO080177
chrV_pilon	Genomic_canonical	assembly_component	111290	131241	.	+	.	Name=Y38C9A;Note=Clone:Y38C9A,GenBank:FO081493
chrV_pilon	Genomic_canonical	assembly_component	164970	199986	.	+	.	Name=Y108G3AL;Note=Clone:Y108G3AL,GenBank:FO081768
chrV_pilon	Genomic_canonical	assembly_component	199787	204353	.	+	.	Name=Y108G3AR;Note=Clone:Y108G3AR,GenBank:FO081021
chrV_pilon	Genomic_canonical	assembly_component	263177	303171	.	+	.	Name=Y58G8A;Note=Clone:Y58G8A,GenBank:FO081283
chrV_pilon	Genomic_canonical	assembly_component	334456	341431	.	+	.	Name=Y39D8C;Note=Clone:Y39D8C,GenBank:FO081282
chrV_pilon	Genomic_canonical	assembly_component	370377	390766	.	+	.	Name=Y39D8B;Note=Clone:Y39D8B,GenBank:FO081741
chrV_pilon	Genomic_canonical	assembly_component	430455	432592	.	+	.	Name=Y39D8A;Note=Clone:Y39D8A,GenBank:FO080237
chrV_pilon	Genomic_canonical	assembly_component	699440	724679	.	+	.	Name=Y49C4A;Note=Clone:Y49C4A,GenBank:FO081566
chrV_pilon	Genomic_canonical	assembly_component	942163	1014479	.	+	.	Name=Y50D4C;Note=Clone:Y50D4C,GenBank:FO081564
chrV_pilon	Genomic_canonical	assembly_component	1090646	1150954	.	+	.	Name=Y50D4B;Note=Clone:Y50D4B,GenBank:FO081617
chrV_pilon	Genomic_canonical	assembly_component	1211864	1260395	.	+	.	Name=Y50D4A;Note=Clone:Y50D4A,GenBank:FO080831
chrV_pilon	Genomic_canonical	assembly_component	1302065	1316200	.	+	.	Name=Y75B7B;Note=Clone:Y75B7B,GenBank:FO080830
chrV_pilon	Genomic_canonical	assembly_component	1364297	1423245	.	+	.	Name=Y75B7AL;Note=Clone:Y75B7AL,GenBank:FO081159
chrV_pilon	Genomic_canonical	assembly_component	1423046	1430258	.	+	.	Name=Y75B7AR;Note=Clone:Y75B7AR,GenBank:FO081685
chrV_pilon	Genomic_canonical	assembly_component	1657480	1694248	.	+	.	Name=Y46H3D;Note=Clone:Y46H3D,GenBank:FO081162
chrV_pilon	Genomic_canonical	assembly_component	1733068	1765251	.	+	.	Name=Y46H3C;Note=Clone:Y46H3C,GenBank:FO081587
chrV_pilon	Genomic_canonical	assembly_component	1802873	1812715	.	+	.	Name=Y46H3B;Note=Clone:Y46H3B,GenBank:FO081308
chrV_pilon	Genomic_canonical	assembly_component	1848777	1870846	.	+	.	Name=Y46H3A;Note=Clone:Y46H3A,GenBank:FO081307
chrV_pilon	Genomic_canonical	assembly_component	1870447	1882405	.	+	.	Name=Y32G9B;Note=Clone:Y32G9B,GenBank:FO081724
chrV_pilon	Genomic_canonical	assembly_component	1922442	1970552	.	+	.	Name=Y32G9A;Note=Clone:Y32G9A,GenBank:FO081712
chrV_pilon	Genomic_canonical	assembly_component	2007279	2014678	.	+	.	Name=Y40B10B;Note=Clone:Y40B10B,GenBank:FO081711
chrV_pilon	Genomic_canonical	assembly_component	2080726	2132114	.	+	.	Name=Y40B10A;Note=Clone:Y40B10A,GenBank:FO081304
chrV_pilon	Genomic_canonical	assembly_component	2233469	2258669	.	+	.	Name=Y5H2B;Note=Clone:Y5H2B,GenBank:FO080876
chrV_pilon	Genomic_canonical	assembly_component	2313286	2324894	.	+	.	Name=Y5H2A;Note=Clone:Y5H2A,GenBank:FO081356
chrV_pilon	Genomic_canonical	assembly_component	2348354	2372117	.	+	.	Name=Y19D10B;Note=Clone:Y19D10B,GenBank:FO081155
chrV_pilon	Genomic_canonical	assembly_component	2463994	2515228	.	+	.	Name=Y45G12C;Note=Clone:Y45G12C,GenBank:FO080245
chrV_pilon	Genomic_canonical	assembly_component	2637944	2656171	.	+	.	Name=Y45G12B;Note=Clone:Y45G12B,GenBank:FO080651
chrV_pilon	Genomic_canonical	assembly_component	2804306	2808765	.	+	.	Name=Y45G12A;Note=Clone:Y45G12A,GenBank:FO081314
chrV_pilon	Genomic_canonical	assembly_component	3047431	3090575	.	+	.	Name=Y73C8C;Note=Clone:Y73C8C,GenBank:FO080919
chrV_pilon	Genomic_canonical	assembly_component	3137496	3158001	.	+	.	Name=Y73C8B;Note=Clone:Y73C8B,GenBank:FO080797
chrV_pilon	Genomic_canonical	assembly_component	3195575	3202004	.	+	.	Name=Y73C8A;Note=Clone:Y73C8A,GenBank:FO081609
chrV_pilon	Genomic_canonical	assembly_component	3631438	3647476	.	+	.	Name=Y39H10B;Note=Clone:Y39H10B,GenBank:FO081513
chrV_pilon	Genomic_canonical	assembly_component	3704348	3741100	.	+	.	Name=Y39H10A;Note=Clone:Y39H10A,GenBank:FO081678
chrV_pilon	Genomic_canonical	assembly_component	4111410	4119899	.	+	.	Name=Y45G5AL;Note=Clone:Y45G5AL,GenBank:FO081705
chrV_pilon	Genomic_canonical	assembly_component	4116900	4163733	.	+	.	Name=Y45G5AM;Note=Clone:Y45G5AM,GenBank:FO081795
chrV_pilon	Genomic_canonical	assembly_component	4161434	4164149	.	+	.	Name=Y45G5AR;Note=Clone:Y45G5AR,GenBank:FO081575
chrV_pilon	Genomic_canonical	assembly_component	4388046	4425527	.	+	.	Name=Y47D7A;Note=Clone:Y47D7A,GenBank:FO081134
chrV_pilon	Genomic_canonical	assembly_component	4514583	4595187	.	+	.	Name=Y61A9LA;Note=Clone:Y61A9LA,GenBank:FO081464
chrV_pilon	Genomic_canonical	assembly_component	4758598	4765863	.	+	.	Name=Y60C6A;Note=Clone:Y60C6A,GenBank:FO080621
chrV_pilon	Genomic_canonical	assembly_component	5037405	5078453	.	+	.	Name=Y58A7A;Note=Clone:Y58A7A,GenBank:FO080343
chrV_pilon	Genomic_canonical	assembly_component	5183566	5202639	.	+	.	Name=Y47A7;Note=Clone:Y47A7,GenBank:FO080302
chrV_pilon	Genomic_canonical	assembly_component	5201940	5220595	.	+	.	Name=Y49G5B;Note=Clone:Y49G5B,GenBank:FO080921
chrV_pilon	Genomic_canonical	assembly_component	6524588	6527683	.	+	.	Name=Y40G12A;Note=Clone:Y40G12A,GenBank:FO081395
chrV_pilon	Genomic_canonical	assembly_component	6942184	6989449	.	+	.	Name=Y57E12B;Note=Clone:Y57E12B,GenBank:FO081627
chrV_pilon	Genomic_canonical	assembly_component	7094090	7102109	.	+	.	Name=Y57E12AL;Note=Clone:Y57E12AL,GenBank:FO081184
chrV_pilon	Genomic_canonical	assembly_component	7101510	7104431	.	+	.	Name=Y57E12AM;Note=Clone:Y57E12AM,GenBank:FO081815
chrV_pilon	Genomic_canonical	assembly_component	7104232	7107928	.	+	.	Name=Y57E12AR;Note=Clone:Y57E12AR,GenBank:FO081234
chrV_pilon	Genomic_canonical	assembly_component	7769810	7776050	.	+	.	Name=Y97E10C;Note=Clone:Y97E10C,GenBank:FO081706
chrV_pilon	Genomic_canonical	assembly_component	8029374	8035610	.	+	.	Name=Y97E10AL;Note=Clone:Y97E10AL,GenBank:FO081228
chrV_pilon	Genomic_canonical	assembly_component	8050159	8070518	.	+	.	Name=Y97E10AR;Note=Clone:Y97E10AR,GenBank:FO081378
chrV_pilon	Genomic_canonical	assembly_component	8386206	8393293	.	+	.	Name=Y51B11A;Note=Clone:Y51B11A,GenBank:FO080434
chrV_pilon	Genomic_canonical	assembly_component	10297456	10330043	.	+	.	Name=Y22F5A;Note=Clone:Y22F5A,GenBank:AL021479
chrV_pilon	Genomic_canonical	assembly_component	10371997	10374118	.	+	.	Name=Y22F5B;Note=Clone:Y22F5B,GenBank:AL021478
chrV_pilon	Genomic_canonical	assembly_component	10470667	10503872	.	+	.	Name=Y32F6A;Note=Clone:Y32F6A,GenBank:AL021474
chrV_pilon	Genomic_canonical	assembly_component	10520346	10537116	.	+	.	Name=Y32F6B;Note=Clone:Y32F6B,GenBank:AL021475
chrV_pilon	Genomic_canonical	assembly_component	10654260	10675829	.	+	.	Name=Y24E3A;Note=Clone:Y24E3A,GenBank:AL023829
chrV_pilon	Genomic_canonical	assembly_component	11155333	11178023	.	+	.	Name=Y42A5A;Note=Clone:Y42A5A,GenBank:AL032618
chrV_pilon	Genomic_canonical	assembly_component	13524630	13542931	.	+	.	Name=Y2H9A;Note=Clone:Y2H9A,GenBank:AL021448
chrV_pilon	Genomic_canonical	assembly_component	14452400	14464950	.	+	.	Name=Y49A3A;Note=Clone:Y49A3A,GenBank:AL033512
chrV_pilon	Genomic_canonical	assembly_component	14673360	14698974	.	+	.	Name=Y40H4A;Note=Clone:Y40H4A,GenBank:AL034391
chrV_pilon	Genomic_canonical	assembly_component	15226895	15230169	.	+	.	Name=Y75B12A;Note=Clone:Y75B12A,GenBank:AL032662
chrV_pilon	Genomic_canonical	assembly_component	15303528	15327433	.	+	.	Name=Y75B12B;Note=Clone:Y75B12B,GenBank:AL032663
chrV_pilon	Genomic_canonical	assembly_component	15851569	15873945	.	+	.	Name=Y6E2A;Note=Clone:Y6E2A,GenBank:AL021175
chrV_pilon	Genomic_canonical	assembly_component	16633223	16642090	.	+	.	Name=Y32B12A;Note=Clone:Y32B12A,GenBank:AL023834
chrV_pilon	Genomic_canonical	assembly_component	16681040	16721912	.	+	.	Name=Y32B12B;Note=Clone:Y32B12B,GenBank:AL031632
chrV_pilon	Genomic_canonical	assembly_component	16749787	16764071	.	+	.	Name=Y32B12C;Note=Clone:Y32B12C,GenBank:AL031634
chrV_pilon	Genomic_canonical	assembly_component	16763966	16773505	.	+	.	Name=Y70C5A;Note=Clone:Y70C5A,GenBank:Z99282
chrV_pilon	Genomic_canonical	assembly_component	16807049	16810184	.	+	.	Name=Y70C5B;Note=Clone:Y70C5B,GenBank:AL021508
chrV_pilon	Genomic_canonical	assembly_component	16948615	16949859	.	+	.	Name=Y70C5D;Note=Clone:Y70C5D,GenBank:AL021507
chrV_pilon	Genomic_canonical	assembly_component	16963377	16974606	.	+	.	Name=Y102A5A;Note=Clone:Y102A5A,GenBank:AL023822
chrV_pilon	Genomic_canonical	assembly_component	17013092	17017753	.	+	.	Name=Y102A5B;Note=Clone:Y102A5B,GenBank:AL023821
chrV_pilon	Genomic_canonical	assembly_component	17080910	17172194	.	+	.	Name=Y102A5C;Note=Clone:Y102A5C,GenBank:AL031627
chrV_pilon	Genomic_canonical	assembly_component	17364293	17395727	.	+	.	Name=Y68A4A;Note=Clone:Y68A4A,GenBank:AL021503
chrV_pilon	Genomic_canonical	assembly_component	17420736	17427606	.	+	.	Name=Y68A4B;Note=Clone:Y68A4B,GenBank:AL023851
chrV_pilon	Genomic_canonical	assembly_component	17427501	17439083	.	+	.	Name=Y61B8A;Note=Clone:Y61B8A,GenBank:AL021501
chrV_pilon	Genomic_canonical	assembly_component	17481705	17518820	.	+	.	Name=Y61B8B;Note=Clone:Y61B8B,GenBank:AL021504
chrV_pilon	Genomic_canonical	assembly_component	17576535	17609754	.	+	.	Name=Y20C6A;Note=Clone:Y20C6A,GenBank:AL021473
chrV_pilon	Genomic_canonical	assembly_component	17803534	17837291	.	+	.	Name=Y6G8;Note=Clone:Y6G8,GenBank:Z92973
chrV_pilon	Genomic_canonical	assembly_component	17905608	17919618	.	+	.	Name=Y26G10;Note=Clone:Y26G10,GenBank:Z98860
chrV_pilon	Genomic_canonical	assembly_component	17919515	17920170	.	+	.	Name=Y94A7A;Note=Clone:Y94A7A,GenBank:AL023857
chrV_pilon	Genomic_canonical	assembly_component	18017181	18049746	.	+	.	Name=Y94A7B;Note=Clone:Y94A7B,GenBank:AL023856
chrV_pilon	Genomic_canonical	assembly_component	18049643	18094788	.	+	.	Name=Y59A8A;Note=Clone:Y59A8A,GenBank:AL132895
chrV_pilon	Genomic_canonical	assembly_component	18144674	18339510	.	+	.	Name=Y59A8B;Note=Clone:Y59A8B,GenBank:AL132898
chrV_pilon	Genomic_canonical	assembly_component	18339410	18382071	.	+	.	Name=Y37H2A;Note=Clone:Y37H2A,GenBank:AL132863
chrV_pilon	Genomic_canonical	assembly_component	18466455	18472401	.	+	.	Name=Y37H2B;Note=Clone:Y37H2B,GenBank:AL023836
chrV_pilon	Genomic_canonical	assembly_component	18510652	18522649	.	+	.	Name=Y37H2C;Note=Clone:Y37H2C,GenBank:AL023837
chrV_pilon	Genomic_canonical	assembly_component	18695733	18697964	.	+	.	Name=Y51A2C;Note=Clone:Y51A2C,GenBank:AL021494
chrV_pilon	Genomic_canonical	assembly_component	18734891	18876760	.	+	.	Name=Y51A2D;Note=Clone:Y51A2D,GenBank:AL021497
chrV_pilon	Genomic_canonical	assembly_component	18876661	18989293	.	+	.	Name=Y69H2;Note=Clone:Y69H2,GenBank:Z98877
chrV_pilon	Genomic_canonical	assembly_component	18989188	19011172	.	+	.	Name=Y17D7C;Note=Clone:Y17D7C,GenBank:AL021471
chrV_pilon	Genomic_canonical	assembly_component	19053951	19078203	.	+	.	Name=Y17D7B;Note=Clone:Y17D7B,GenBank:AL021472
chrV_pilon	Genomic_canonical	assembly_component	19116574	19138067	.	+	.	Name=Y17D7A;Note=Clone:Y17D7A,GenBank:AL021470
chrV_pilon	Genomic_canonical	assembly_component	19137961	19242237	.	+	.	Name=Y80D3A;Note=Clone:Y80D3A,GenBank:AL132853
chrV_pilon	Genomic_canonical	assembly_component	19242119	19493018	.	+	.	Name=Y39B6A;Note=Clone:Y39B6A,GenBank:AL132948
chrV_pilon	Genomic_canonical	assembly_component	19644551	19688466	.	+	.	Name=Y43F8A;Note=Clone:Y43F8A,GenBank:AL032640
chrV_pilon	Genomic_canonical	assembly_component	19748788	19850933	.	+	.	Name=Y43F8B;Note=Clone:Y43F8B,GenBank:AL032623
chrV_pilon	Genomic_canonical	assembly_component	19894373	20030014	.	+	.	Name=Y43F8C;Note=Clone:Y43F8C,GenBank:AL032637
chrV_pilon	Genomic_canonical	assembly_component	20029906	20043787	.	+	.	Name=Y116F11A;Note=Clone:Y116F11A,GenBank:AL132872
chrV_pilon	Genomic_canonical	assembly_component	20108048	20214575	.	+	.	Name=Y116F11B;Note=Clone:Y116F11B,GenBank:AL132943
chrV_pilon	Genomic_canonical	assembly_component	20214468	20337976	.	+	.	Name=Y60A3A;Note=Clone:Y60A3A,GenBank:AL117207
chrV_pilon	Genomic_canonical	assembly_component	20337864	20460502	.	+	.	Name=Y113G7A;Note=Clone:Y113G7A,GenBank:AL132858
chrV_pilon	Genomic_canonical	assembly_component	20499231	20588195	.	+	.	Name=Y113G7B;Note=Clone:Y113G7B,GenBank:AL110477
chrV_pilon	Genomic_canonical	assembly_component	20623844	20637066	.	+	.	Name=Y113G7C;Note=Clone:Y113G7C,GenBank:AL033509
chrV_pilon	Genomic_canonical	assembly_component	20636952	20661168	.	+	.	Name=Y38H6A;Note=Clone:Y38H6A,GenBank:AL032628
chrV_pilon	Genomic_canonical	assembly_component	20698011	20699619	.	+	.	Name=Y38H6B;Note=Clone:Y38H6B,GenBank:AL031631
chrV_pilon	Genomic_canonical	assembly_component	20810894	20874780	.	+	.	Name=Y38H6C;Note=Clone:Y38H6C,GenBank:AL031630
chrV_pilon	Genomic_canonical	assembly_component	20950077	20964353	.	+	.	Name=Y44A6B;Note=Clone:Y44A6B,GenBank:AL021491
chrV_pilon	Genomic_canonical	assembly_component	21024286	21038631	.	+	.	Name=Y44A6C;Note=Clone:Y44A6C,GenBank:AL021489
chrV_pilon	Genomic_canonical	assembly_component	21097059	21130898	.	+	.	Name=Y44A6D;Note=Clone:Y44A6D,GenBank:AL023842
chrV_pilon	Genomic_canonical	assembly_component	21231941	21234598	.	+	.	Name=Y44A6E;Note=Clone:Y44A6E,GenBank:AL033511
chrX_pilon	Genomic_canonical	assembly_component	37486	48896	.	+	.	Name=Y35H6;Note=Clone:Y35H6,GenBank:FO081757
chrX_pilon	Genomic_canonical	assembly_component	48697	178022	.	+	.	Name=Y73B3A;Note=Clone:Y73B3A,GenBank:FO081721
chrX_pilon	Genomic_canonical	assembly_component	218829	235901	.	+	.	Name=Y73B3B;Note=Clone:Y73B3B,GenBank:FO081720
chrX_pilon	Genomic_canonical	assembly_component	235702	236697	.	+	.	Name=Y15D9A;Note=Clone:Y15D9A,GenBank:FO080096
chrX_pilon	Genomic_canonical	assembly_component	275795	301341	.	+	.	Name=Y108F1;Note=Clone:Y108F1,GenBank:FO080095
chrX_pilon	Genomic_canonical	assembly_component	301142	335390	.	+	.	Name=Y47C4A;Note=Clone:Y47C4A,GenBank:FO081691
chrX_pilon	Genomic_canonical	assembly_component	716567	731239	.	+	.	Name=Y9C12A;Note=Clone:Y9C12A,GenBank:FO081073
chrX_pilon	Genomic_canonical	assembly_component	1718485	1719682	.	+	.	Name=Y75D11B;Note=Clone:Y75D11B,GenBank:FO081680
chrX_pilon	Genomic_canonical	assembly_component	1803193	1849244	.	+	.	Name=Y75D11A;Note=Clone:Y75D11A,GenBank:FO081079
chrX_pilon	Genomic_canonical	assembly_component	2010583	2023813	.	+	.	Name=Y59E1A;Note=Clone:Y59E1A,GenBank:FO081444
chrX_pilon	Genomic_canonical	assembly_component	2074172	2087383	.	+	.	Name=Y40A1A;Note=Clone:Y40A1A,GenBank:FO081443
chrX_pilon	Genomic_canonical	assembly_component	2087190	2156064	.	+	.	Name=Y102A11A;Note=Clone:Y102A11A,GenBank:FO081432
chrX_pilon	Genomic_canonical	assembly_component	2831220	2852715	.	+	.	Name=Y76F7A;Note=Clone:Y76F7A,GenBank:FO081225
chrX_pilon	Genomic_canonical	assembly_component	2937451	2949984	.	+	.	Name=Y71H10B;Note=Clone:Y71H10B,GenBank:FO080403
chrX_pilon	Genomic_canonical	assembly_component	3039616	3053010	.	+	.	Name=Y71H10A;Note=Clone:Y71H10A,GenBank:FO081433
chrX_pilon	Genomic_canonical	assembly_component	3052811	3114524	.	+	.	Name=Y41G9A;Note=Clone:Y41G9A,GenBank:FO081792
chrX_pilon	Genomic_canonical	assembly_component	5463754	5512637	.	+	.	Name=Y34B4A;Note=Clone:Y34B4A,GenBank:FO081274
chrX_pilon	Genomic_canonical	assembly_component	6134984	6154001	.	+	.	Name=Y23B4A;Note=Clone:Y23B4A,GenBank:FO080886
chrX_pilon	Genomic_canonical	assembly_component	6359033	6363158	.	+	.	Name=Y72A10A;Note=Clone:Y72A10A,GenBank:FO080556
chrX_pilon	Genomic_canonical	assembly_component	9410734	9449659	.	+	.	Name=Y81B9A;Note=Clone:Y81B9A,GenBank:FO080239
chrX_pilon	Genomic_canonical	assembly_component	11910378	11931784	.	+	.	Name=Y71H9A;Note=Clone:Y71H9A,GenBank:AL032659
chrX_pilon	Genomic_canonical	assembly_component	12175142	12235865	.	+	.	Name=Y62H9A;Note=Clone:Y62H9A,GenBank:AL032630
chrX_pilon	Genomic_canonical	assembly_component	13940220	13957717	.	+	.	Name=Y12A6A;Note=Clone:Y12A6A,GenBank:AL023827
chrX_pilon	Genomic_canonical	assembly_component	14074641	14074928	.	+	.	Name=Y6D6A;Note=Clone:Y6D6A,GenBank:AL023852
chrX_pilon	Genomic_canonical	assembly_component	14228771	14247475	.	+	.	Name=Y26E6A;Note=Clone:Y26E6A,GenBank:AL023830
chrX_pilon	Genomic_canonical	assembly_component	14694361	14741849	.	+	.	Name=Y60A9A;Note=Clone:Y60A9A,GenBank:AL110495
chrX_pilon	Genomic_canonical	assembly_component	14798295	14806842	.	+	.	Name=Y66C5A;Note=Clone:Y66C5A,GenBank:AL021502
chrX_pilon	Genomic_canonical	assembly_component	15115867	15121730	.	+	.	Name=Y16B4A;Note=Clone:Y16B4A,GenBank:AL023825
chrX_pilon	Genomic_canonical	assembly_component	15676984	15724805	.	+	.	Name=Y15E3A;Note=Clone:Y15E3A,GenBank:AL132841
chrX_pilon	Genomic_canonical	assembly_component	16133291	16202105	.	+	.	Name=Y7A5A;Note=Clone:Y7A5A,GenBank:AL034489
chrX_pilon	Genomic_canonical	assembly_component	16262924	16275723	.	+	.	Name=Y67D11A;Note=Clone:Y67D11A,GenBank:AL023850
chrX_pilon	Genomic_canonical	assembly_component	17256298	17262858	.	+	.	Name=Y13C8A;Note=Clone:Y13C8A,GenBank:FO081334
chrX_pilon	Genomic_canonical	assembly_component	17628604	17645730	.	+	.	Name=Y40C7B;Note=Clone:Y40C7B,GenBank:FO080762
chrX_pilon	Genomic_canonical	assembly_component	17722578	17728346	.	+	.	Name=Y40C7A;Note=Clone:Y40C7A,GenBank:FO080924

## Sheet: unliftable_YACs_in_N2.gff3
# Split in new
I	Genomic_canonical	assembly_component	1342084	1386493	.	+	.	Name=Y92H12BL;Note=Clone:Y92H12BL,GenBank:FO081632
# Partially deleted in new
I	Genomic_canonical	assembly_component	4503087	4559858	.	+	.	Name=Y119C1B;Note=Clone:Y119C1B,GenBank:FO080992
# Partially deleted in new
I	Genomic_canonical	assembly_component	9815412	9842596	.	+	.	Name=Y67A6A;Note=Clone:Y67A6A,GenBank:AL032645
# Partially deleted in new
I	Genomic_canonical	assembly_component	10199700	10237403	.	+	.	Name=Y106G6E;Note=Clone:Y106G6E,GenBank:AL032656
# Partially deleted in new
I	Genomic_canonical	assembly_component	10271514	10272136	.	+	.	Name=Y106G6F;Note=Clone:Y106G6F,GenBank:AL032619
# Partially deleted in new
I	Genomic_canonical	assembly_component	10940616	10962343	.	+	.	Name=Y95D11A;Note=Clone:Y95D11A,GenBank:AL132852
# Split in new
I	Genomic_canonical	assembly_component	12464845	12470298	.	+	.	Name=Y91F4A;Note=Clone:Y91F4A,GenBank:AL032664
# Partially deleted in new
II	Genomic_canonical	assembly_component	1401244	1469904	.	+	.	Name=Y51H7C;Note=Clone:Y51H7C,GenBank:FO081466
# Split in new
II	Genomic_canonical	assembly_component	1974531	1991749	.	+	.	Name=Y16E11A;Note=Clone:Y16E11A,GenBank:FO080835
# Partially deleted in new
II	Genomic_canonical	assembly_component	4637967	4653217	.	+	.	Name=Y74E4A;Note=Clone:Y74E4A,GenBank:FO081294
# Partially deleted in new
II	Genomic_canonical	assembly_component	9806777	9830383	.	+	.	Name=Y53C12C;Note=Clone:Y53C12C,GenBank:Z95623
# Partially deleted in new
III	Genomic_canonical	assembly_component	1291666	1306729	.	+	.	Name=Y119D3A;Note=Clone:Y119D3A,GenBank:FO081826
# Partially deleted in new
III	Genomic_canonical	assembly_component	2489005	2566425	.	+	.	Name=Y54F10AM;Note=Clone:Y54F10AM,GenBank:FO081806
# Partially deleted in new
III	Genomic_canonical	assembly_component	7401609	7459293	.	+	.	Name=Y69F12A;Note=Clone:Y69F12A,GenBank:FO081549
# Partially deleted in new
III	Genomic_canonical	assembly_component	7592472	7603345	.	+	.	Name=Y80D4G;Note=Clone:Y80D4G,GenBank:FO081689
# Partially deleted in new
III	Genomic_canonical	assembly_component	13586634	13603142	.	+	.	Name=Y76A2C;Note=Clone:Y76A2C,GenBank:AL032666
# Split in new
IV	Genomic_canonical	assembly_component	6659565	6752832	.	+	.	Name=Y73B6A;Note=Clone:Y73B6A,GenBank:FO080249
# Partially deleted in new
IV	Genomic_canonical	assembly_component	7588887	7605985	.	+	.	Name=Y2C2A;Note=Clone:Y2C2A,GenBank:FO081279
# Partially deleted in new
IV	Genomic_canonical	assembly_component	8562751	8582098	.	+	.	Name=Y59H11AM;Note=Clone:Y59H11AM,GenBank:FO081816
# Partially deleted in new
IV	Genomic_canonical	assembly_component	9037457	9066255	.	+	.	Name=Y73F4A;Note=Clone:Y73F4A,GenBank:AL032661
# Partially deleted in new
IV	Genomic_canonical	assembly_component	11061704	11080100	.	+	.	Name=Y5F2A;Note=Clone:Y5F2A,GenBank:AL032641
# Partially deleted in new
V	Genomic_canonical	assembly_component	2346635	2414577	.	+	.	Name=Y19D10A;Note=Clone:Y19D10A,GenBank:FO080522
# Partially deleted in new
V	Genomic_canonical	assembly_component	5281702	5304917	.	+	.	Name=Y49G5A;Note=Clone:Y49G5A,GenBank:FO080134
# Split in new
V	Genomic_canonical	assembly_component	6055153	6102935	.	+	.	Name=Y38A10A;Note=Clone:Y38A10A,GenBank:FO081168
# Partially deleted in new
V	Genomic_canonical	assembly_component	6164036	6187589	.	+	.	Name=Y38B5A;Note=Clone:Y38B5A,GenBank:FO081528
# Partially deleted in new
V	Genomic_canonical	assembly_component	7910066	7946950	.	+	.	Name=Y97E10B;Note=Clone:Y97E10B,GenBank:FO081229
# Partially deleted in new
V	Genomic_canonical	assembly_component	7988649	7995666	.	+	.	Name=Y97E10AM;Note=Clone:Y97E10AM,GenBank:FO081829
# Partially deleted in new
V	Genomic_canonical	assembly_component	9428195	9441172	.	+	.	Name=Y54B9A;Note=Clone:Y54B9A,GenBank:FO081562
# Split in new
V	Genomic_canonical	assembly_component	14724985	14786848	.	+	.	Name=Y50E8A;Note=Clone:Y50E8A,GenBank:AL117200
# Split in new
V	Genomic_canonical	assembly_component	15423232	15431763	.	+	.	Name=Y36E3A;Note=Clone:Y36E3A,GenBank:AL032620
# Partially deleted in new
V	Genomic_canonical	assembly_component	16703355	16723993	.	+	.	Name=Y70C5C;Note=Clone:Y70C5C,GenBank:Z99283
# Partially deleted in new
V	Genomic_canonical	assembly_component	17121884	17147337	.	+	.	Name=Y102A5D;Note=Clone:Y102A5D,GenBank:AL031628
# Split in new
V	Genomic_canonical	assembly_component	18280026	18316328	.	+	.	Name=Y51A2A;Note=Clone:Y51A2A,GenBank:AL032635
# Partially deleted in new
V	Genomic_canonical	assembly_component	18372931	18401933	.	+	.	Name=Y51A2B;Note=Clone:Y51A2B,GenBank:AL021493
# Partially deleted in new
X	Genomic_canonical	assembly_component	1871915	1892494	.	+	.	Name=Y59E1B;Note=Clone:Y59E1B,GenBank:FO080159
# Partially deleted in new
X	Genomic_canonical	assembly_component	3006237	3015804	.	+	.	Name=Y48D7A;Note=Clone:Y48D7A,GenBank:FO081649
# Partially deleted in new
X	Genomic_canonical	assembly_component	4024980	4061064	.	+	.	Name=Y80E2A;Note=Clone:Y80E2A,GenBank:FO081665
# Split in new
X	Genomic_canonical	assembly_component	5041609	5057642	.	+	.	Name=Y64H9A;Note=Clone:Y64H9A,GenBank:FO080660
# Partially deleted in new
X	Genomic_canonical	assembly_component	7076661	7085648	.	+	.	Name=Y1B5A;Note=Clone:Y1B5A,GenBank:FO080189
# Partially deleted in new
X	Genomic_canonical	assembly_component	10352434	10376483	.	+	.	Name=Y49A10A;Note=Clone:Y49A10A,GenBank:AL032624
# Partially deleted in new
X	Genomic_canonical	assembly_component	11778913	11791327	.	+	.	Name=Y102F5A;Note=Clone:Y102F5A,GenBank:AL032629
# Partially deleted in new
X	Genomic_canonical	assembly_component	14901312	14922579	.	+	.	Name=Y70D2A;Note=Clone:Y70D2A,GenBank:AL033513

## Sheet: VC2010_TREs.gff3
##gff-version 3
chrI_pilon	.	repeat_region	4605602	4668785	.	.	.	Note=recalcitrant_gap
chrII_pilon	.	repeat_region	14525986	14566400	.	.	.	Note=recalcitrant_gap
chrIII_pilon	.	repeat_region	7587315	7682900	.	.	.	Note=recalcitrant_gap
chrX_pilon	.	repeat_region	4149383	4226837	.	.	.	Note=recalcitrant_gap
chrX_pilon	.	repeat_region	5215995	5284061	.	.	.	Note=recalcitrant_gap
chrI_pilon	.	repeat_region	1	2265	.	.	.	Note=tandem_repeat_expansion
chrI_pilon	.	repeat_region	671504	680949	.	.	.	Note=tandem_repeat_expansion
chrI_pilon	.	repeat_region	943053	953359	.	.	.	Note=tandem_repeat_expansion
chrI_pilon	.	repeat_region	1961556	1968308	.	.	.	Note=tandem_repeat_expansion
chrI_pilon	.	repeat_region	2574456	2585304	.	.	.	Note=tandem_repeat_expansion
chrI_pilon	.	repeat_region	3213784	3217734	.	.	.	Note=tandem_repeat_expansion
chrI_pilon	.	repeat_region	3435419	3440282	.	.	.	Note=tandem_repeat_expansion
chrI_pilon	.	repeat_region	3711970	3716636	.	.	.	Note=tandem_repeat_expansion
chrI_pilon	.	repeat_region	8015055	8017034	.	.	.	Note=tandem_repeat_expansion
chrI_pilon	.	repeat_region	10374806	10387363	.	.	.	Note=tandem_repeat_expansion
chrI_pilon	.	repeat_region	11137317	11159613	.	.	.	Note=tandem_repeat_expansion
chrI_pilon	.	repeat_region	11592267	11597904	.	.	.	Note=tandem_repeat_expansion
chrI_pilon	.	repeat_region	12310644	12315099	.	.	.	Note=tandem_repeat_expansion
chrI_pilon	.	repeat_region	13456758	13461911	.	.	.	Note=tandem_repeat_expansion
chrI_pilon	.	repeat_region	14697045	14704558	.	.	.	Note=tandem_repeat_expansion
chrII_pilon	.	repeat_region	503707	507142	.	.	.	Note=tandem_repeat_expansion
chrII_pilon	.	repeat_region	1992816	1994300	.	.	.	Note=tandem_repeat_expansion
chrII_pilon	.	repeat_region	2588225	2596808	.	.	.	Note=tandem_repeat_expansion
chrII_pilon	.	repeat_region	3189713	3209379	.	.	.	Note=tandem_repeat_expansion
chrII_pilon	.	repeat_region	3505654	3514461	.	.	.	Note=tandem_repeat_expansion
chrII_pilon	.	repeat_region	5140544	5141021	.	.	.	Note=tandem_repeat_expansion
chrII_pilon	.	repeat_region	5166220	5171027	.	.	.	Note=tandem_repeat_expansion
chrII_pilon	.	repeat_region	9530986	9537399	.	.	.	Note=tandem_repeat_expansion
chrII_pilon	.	repeat_region	9939408	9944318	.	.	.	Note=tandem_repeat_expansion
chrII_pilon	.	repeat_region	13755424	13762969	.	.	.	Note=tandem_repeat_expansion
chrII_pilon	.	repeat_region	14112346	14115907	.	.	.	Note=tandem_repeat_expansion
chrIII_pilon	.	repeat_region	327503	343338	.	.	.	Note=tandem_repeat_expansion
chrIII_pilon	.	repeat_region	958146	973706	.	.	.	Note=tandem_repeat_expansion
chrIII_pilon	.	repeat_region	1442278	1450930	.	.	.	Note=tandem_repeat_expansion
chrIII_pilon	.	repeat_region	2604613	2620886	.	.	.	Note=tandem_repeat_expansion
chrIII_pilon	.	repeat_region	3456372	3470381	.	.	.	Note=tandem_repeat_expansion
chrIII_pilon	.	repeat_region	4031388	4033004	.	.	.	Note=tandem_repeat_expansion
chrIII_pilon	.	repeat_region	5494311	5534875	.	.	.	Note=tandem_repeat_expansion
chrIII_pilon	.	repeat_region	6746894	6755239	.	.	.	Note=tandem_repeat_expansion
chrIII_pilon	.	repeat_region	9125488	9139755	.	.	.	Note=tandem_repeat_expansion
chrIII_pilon	.	repeat_region	10519572	10525401	.	.	.	Note=tandem_repeat_expansion
chrIII_pilon	.	repeat_region	11729905	11741474	.	.	.	Note=tandem_repeat_expansion
chrIII_pilon	.	repeat_region	13335991	13337831	.	.	.	Note=tandem_repeat_expansion
chrIII_pilon	.	repeat_region	13762919	13765376	.	.	.	Note=tandem_repeat_expansion
chrIV_pilon	.	repeat_region	1845844	1850072	.	.	.	Note=tandem_repeat_expansion
chrIV_pilon	.	repeat_region	1949632	1950699	.	.	.	Note=tandem_repeat_expansion
chrIV_pilon	.	repeat_region	4479505	4488125	.	.	.	Note=tandem_repeat_expansion
chrIV_pilon	.	repeat_region	5529413	5534712	.	.	.	Note=tandem_repeat_expansion
chrIV_pilon	.	repeat_region	8607399	8623710	.	.	.	Note=tandem_repeat_expansion
chrIV_pilon	.	repeat_region	11013673	11031370	.	.	.	Note=tandem_repeat_expansion
chrIV_pilon	.	repeat_region	11170588	11180849	.	.	.	Note=tandem_repeat_expansion
chrIV_pilon	.	repeat_region	11180849	11199203	.	.	.	Note=tandem_repeat_expansion
chrIV_pilon	.	repeat_region	11734640	11742712	.	.	.	Note=tandem_repeat_expansion
chrIV_pilon	.	repeat_region	12150480	12159542	.	.	.	Note=tandem_repeat_expansion
chrIV_pilon	.	repeat_region	13061020	13070580	.	.	.	Note=tandem_repeat_expansion
chrIV_pilon	.	repeat_region	13110946	13113106	.	.	.	Note=tandem_repeat_expansion
chrIV_pilon	.	repeat_region	14119224	14123735	.	.	.	Note=tandem_repeat_expansion
chrIV_pilon	.	repeat_region	14247582	14258886	.	.	.	Note=tandem_repeat_expansion
chrIV_pilon	.	repeat_region	15280468	15283925	.	.	.	Note=tandem_repeat_expansion
chrIV_pilon	.	repeat_region	15869736	15871498	.	.	.	Note=tandem_repeat_expansion
chrIV_pilon	.	repeat_region	16493221	16495556	.	.	.	Note=tandem_repeat_expansion
chrIV_pilon	.	repeat_region	16493224	16495556	.	.	.	Note=tandem_repeat_expansion
chrIV_pilon	.	repeat_region	17319489	17323914	.	.	.	Note=tandem_repeat_expansion
chrV_pilon	.	repeat_region	3049118	3056677	.	.	.	Note=tandem_repeat_expansion
chrV_pilon	.	repeat_region	3392112	3413502	.	.	.	Note=tandem_repeat_expansion
chrV_pilon	.	repeat_region	5051846	5065670	.	.	.	Note=tandem_repeat_expansion
chrV_pilon	.	repeat_region	5272165	5283865	.	.	.	Note=tandem_repeat_expansion
chrV_pilon	.	repeat_region	5638110	5643419	.	.	.	Note=tandem_repeat_expansion
chrV_pilon	.	repeat_region	6165504	6179481	.	.	.	Note=tandem_repeat_expansion
chrV_pilon	.	repeat_region	6955659	6962900	.	.	.	Note=tandem_repeat_expansion
chrV_pilon	.	repeat_region	7762001	7764571	.	.	.	Note=tandem_repeat_expansion
chrV_pilon	.	repeat_region	8388016	8392718	.	.	.	Note=tandem_repeat_expansion
chrV_pilon	.	repeat_region	8761483	8777144	.	.	.	Note=tandem_repeat_expansion
chrV_pilon	.	repeat_region	10655040	10675597	.	.	.	Note=tandem_repeat_expansion
chrV_pilon	.	repeat_region	11342033	11345912	.	.	.	Note=tandem_repeat_expansion
chrV_pilon	.	repeat_region	12584489	12601042	.	.	.	Note=tandem_repeat_expansion
chrV_pilon	.	repeat_region	13735934	13740448	.	.	.	Note=tandem_repeat_expansion
chrV_pilon	.	repeat_region	13979516	13981885	.	.	.	Note=tandem_repeat_expansion
chrV_pilon	.	repeat_region	15441107	15445864	.	.	.	Note=tandem_repeat_expansion
chrV_pilon	.	repeat_region	17487761	17516101	.	.	.	Note=tandem_repeat_expansion
chrV_pilon	.	repeat_region	17588678	17608486	.	.	.	Note=tandem_repeat_expansion
chrV_pilon	.	repeat_region	18406776	18410367	.	.	.	Note=tandem_repeat_expansion
chrV_pilon	.	repeat_region	18413559	18417143	.	.	.	Note=tandem_repeat_expansion
chrV_pilon	.	repeat_region	18642191	18655979	.	.	.	Note=tandem_repeat_expansion
chrV_pilon	.	repeat_region	18938047	18943851	.	.	.	Note=tandem_repeat_expansion
chrV_pilon	.	repeat_region	19165078	19167643	.	.	.	Note=tandem_repeat_expansion
chrV_pilon	.	repeat_region	19264891	19266632	.	.	.	Note=tandem_repeat_expansion
chrV_pilon	.	repeat_region	19480246	19483655	.	.	.	Note=tandem_repeat_expansion
chrV_pilon	.	repeat_region	19652910	19660543	.	.	.	Note=tandem_repeat_expansion
chrV_pilon	.	repeat_region	20061414	20063415	.	.	.	Note=tandem_repeat_expansion
chrX_pilon	.	repeat_region	1	2668	.	.	.	Note=tandem_repeat_expansion
chrX_pilon	.	repeat_region	309556	317004	.	.	.	Note=tandem_repeat_expansion
chrX_pilon	.	repeat_region	317599	334534	.	.	.	Note=tandem_repeat_expansion
chrX_pilon	.	repeat_region	1682598	1693172	.	.	.	Note=tandem_repeat_expansion
chrX_pilon	.	repeat_region	2097783	2102474	.	.	.	Note=tandem_repeat_expansion
chrX_pilon	.	repeat_region	2108916	2110641	.	.	.	Note=tandem_repeat_expansion
chrX_pilon	.	repeat_region	2157129	2162509	.	.	.	Note=tandem_repeat_expansion
chrX_pilon	.	repeat_region	3099745	3103269	.	.	.	Note=tandem_repeat_expansion
chrX_pilon	.	repeat_region	3115301	3123080	.	.	.	Note=tandem_repeat_expansion
chrX_pilon	.	repeat_region	3188773	3189306	.	.	.	Note=tandem_repeat_expansion
chrX_pilon	.	repeat_region	3747624	3752414	.	.	.	Note=tandem_repeat_expansion
chrX_pilon	.	repeat_region	7306206	7313838	.	.	.	Note=tandem_repeat_expansion
chrX_pilon	.	repeat_region	7586210	7592860	.	.	.	Note=tandem_repeat_expansion
chrX_pilon	.	repeat_region	9421574	9442113	.	.	.	Note=tandem_repeat_expansion
chrX_pilon	.	repeat_region	10621574	10641106	.	.	.	Note=tandem_repeat_expansion
chrX_pilon	.	repeat_region	11722466	11725793	.	.	.	Note=tandem_repeat_expansion
chrX_pilon	.	repeat_region	11725792	11730349	.	.	.	Note=tandem_repeat_expansion
chrX_pilon	.	repeat_region	12072285	12079665	.	.	.	Note=tandem_repeat_expansion
chrX_pilon	.	repeat_region	15253034	15270757	.	.	.	Note=tandem_repeat_expansion
chrX_pilon	.	repeat_region	15588435	15598283	.	.	.	Note=tandem_repeat_expansion
chrX_pilon	.	repeat_region	17129965	17135096	.	.	.	Note=tandem_repeat_expansion
chrX_pilon	.	repeat_region	17305189	17316218	.	.	.	Note=tandem_repeat_expansion
chrX_pilon	.	repeat_region	17687246	17689976	.	.	.	Note=tandem_repeat_expansion
chrX_pilon	.	repeat_region	17820401	17822142	.	.	.	Note=tandem_repeat_expansion

## Sheet: VC2010_TREs.in.YACs.gff3
##gff-version 3
chrII_pilon	.	repeat_region	14525986	14566400	.	.	.	Note=recalcitrant_gap
chrI_pilon	.	repeat_region	1895	2265	.	.	.	Note=tandem_repeat_expansion
chrI_pilon	.	repeat_region	679704	680949	.	.	.	Note=tandem_repeat_expansion
chrI_pilon	.	repeat_region	671504	678970	.	.	.	Note=tandem_repeat_expansion
chrI_pilon	.	repeat_region	943053	953359	.	.	.	Note=tandem_repeat_expansion
chrI_pilon	.	repeat_region	1961556	1968308	.	.	.	Note=tandem_repeat_expansion
chrI_pilon	.	repeat_region	2574456	2585304	.	.	.	Note=tandem_repeat_expansion
chrI_pilon	.	repeat_region	3213784	3217734	.	.	.	Note=tandem_repeat_expansion
chrI_pilon	.	repeat_region	11592267	11597904	.	.	.	Note=tandem_repeat_expansion
chrI_pilon	.	repeat_region	12310644	12315099	.	.	.	Note=tandem_repeat_expansion
chrI_pilon	.	repeat_region	14697045	14704558	.	.	.	Note=tandem_repeat_expansion
chrII_pilon	.	repeat_region	3189713	3209379	.	.	.	Note=tandem_repeat_expansion
chrII_pilon	.	repeat_region	3510132	3514461	.	.	.	Note=tandem_repeat_expansion
chrII_pilon	.	repeat_region	9530986	9537399	.	.	.	Note=tandem_repeat_expansion
chrII_pilon	.	repeat_region	13755424	13762969	.	.	.	Note=tandem_repeat_expansion
chrIII_pilon	.	repeat_region	327503	343338	.	.	.	Note=tandem_repeat_expansion
chrIII_pilon	.	repeat_region	958146	973706	.	.	.	Note=tandem_repeat_expansion
chrIII_pilon	.	repeat_region	1442278	1450930	.	.	.	Note=tandem_repeat_expansion
chrIII_pilon	.	repeat_region	3456372	3470381	.	.	.	Note=tandem_repeat_expansion
chrIII_pilon	.	repeat_region	5494311	5534875	.	.	.	Note=tandem_repeat_expansion
chrIII_pilon	.	repeat_region	10519572	10525401	.	.	.	Note=tandem_repeat_expansion
chrIII_pilon	.	repeat_region	11729905	11741474	.	.	.	Note=tandem_repeat_expansion
chrIII_pilon	.	repeat_region	13762919	13765376	.	.	.	Note=tandem_repeat_expansion
chrIV_pilon	.	repeat_region	1845844	1849909	.	.	.	Note=tandem_repeat_expansion
chrIV_pilon	.	repeat_region	4481674	4486902	.	.	.	Note=tandem_repeat_expansion
chrIV_pilon	.	repeat_region	4479505	4481873	.	.	.	Note=tandem_repeat_expansion
chrIV_pilon	.	repeat_region	5529413	5534712	.	.	.	Note=tandem_repeat_expansion
chrIV_pilon	.	repeat_region	11013673	11031370	.	.	.	Note=tandem_repeat_expansion
chrIV_pilon	.	repeat_region	11734640	11742712	.	.	.	Note=tandem_repeat_expansion
chrIV_pilon	.	repeat_region	12158888	12159542	.	.	.	Note=tandem_repeat_expansion
chrIV_pilon	.	repeat_region	12150480	12158987	.	.	.	Note=tandem_repeat_expansion
chrIV_pilon	.	repeat_region	14119224	14123735	.	.	.	Note=tandem_repeat_expansion
chrIV_pilon	.	repeat_region	14247582	14258886	.	.	.	Note=tandem_repeat_expansion
chrIV_pilon	.	repeat_region	15280468	15283925	.	.	.	Note=tandem_repeat_expansion
chrIV_pilon	.	repeat_region	15869736	15871498	.	.	.	Note=tandem_repeat_expansion
chrIV_pilon	.	repeat_region	16493221	16495556	.	.	.	Note=tandem_repeat_expansion
chrIV_pilon	.	repeat_region	16493224	16495556	.	.	.	Note=tandem_repeat_expansion
chrIV_pilon	.	repeat_region	17319489	17323914	.	.	.	Note=tandem_repeat_expansion
chrV_pilon	.	repeat_region	3049118	3056677	.	.	.	Note=tandem_repeat_expansion
chrV_pilon	.	repeat_region	5051846	5065670	.	.	.	Note=tandem_repeat_expansion
chrV_pilon	.	repeat_region	6955659	6962900	.	.	.	Note=tandem_repeat_expansion
chrV_pilon	.	repeat_region	8388016	8392718	.	.	.	Note=tandem_repeat_expansion
chrV_pilon	.	repeat_region	10655040	10675597	.	.	.	Note=tandem_repeat_expansion
chrV_pilon	.	repeat_region	17487761	17516101	.	.	.	Note=tandem_repeat_expansion
chrV_pilon	.	repeat_region	17588678	17608486	.	.	.	Note=tandem_repeat_expansion
chrV_pilon	.	repeat_region	18938047	18943851	.	.	.	Note=tandem_repeat_expansion
chrV_pilon	.	repeat_region	19165078	19167643	.	.	.	Note=tandem_repeat_expansion
chrV_pilon	.	repeat_region	19264891	19266632	.	.	.	Note=tandem_repeat_expansion
chrV_pilon	.	repeat_region	19480246	19483655	.	.	.	Note=tandem_repeat_expansion
chrV_pilon	.	repeat_region	19652910	19660543	.	.	.	Note=tandem_repeat_expansion
chrX_pilon	.	repeat_region	309556	317004	.	.	.	Note=tandem_repeat_expansion
chrX_pilon	.	repeat_region	317599	334534	.	.	.	Note=tandem_repeat_expansion
chrX_pilon	.	repeat_region	2097783	2102474	.	.	.	Note=tandem_repeat_expansion
chrX_pilon	.	repeat_region	2108916	2110641	.	.	.	Note=tandem_repeat_expansion
chrX_pilon	.	repeat_region	3099745	3103269	.	.	.	Note=tandem_repeat_expansion
chrX_pilon	.	repeat_region	9421574	9442113	.	.	.	Note=tandem_repeat_expansion
