# Supplementary material for: Recompleting the Caenorhabditis elegans genome
Source: HighWire-hosted journal article supplement (doi:10.1101/gr.244830.118), 2019-05-23
Supplement: Supplemental_Table_S11.xlsx [file Supplemental_Table_S11.xlsx]

## Sheet: VC2010_Supp_Table_11
		Number of occurrences			Expected number of occurrences predicted from
repetitive elements of RNA	Length	In VC2010	In a Nanopore read (its length)		nanopore reads	PacBio reads
5S RNA	980 b	26	67	(83,198 b)	144 – 145	55
18S/28S RNA	7203 b	2	6	(85,610 b)	28 – 55	7 - 14
pSX1	172 b	106	185	(42,319 b)	167	174
