# Supplementary material for: Recompleting the Caenorhabditis elegans genome
Source: HighWire-hosted journal article supplement (doi:10.1101/gr.244830.118), 2019-05-23
Supplement: Supplemental_Table_S12.xlsx [file Supplemental_Table_S12.xlsx]

## Sheet: VC2010_Supp_Table_12
Type of repeat	start in query	end in query	query coverage (%)	chr	start in chromosome	end in chromosome	identity (%)	#aligned bases	#mismatches	#gaps	E-value	bit score		Avg identity (%)	98.7676
5SRNA	1	980	100	chrV	17283637	17284618	98.577	984	8	5	0	1735
5SRNA	1	980	100	chrV	17284613	17285594	98.577	984	8	5	0	1735
5SRNA	1	980	100	chrV	17285589	17286570	98.577	984	8	5	0	1735
5SRNA	1	980	100	chrV	17286565	17287547	98.477	985	8	5	0	1729
5SRNA	1	980	100	chrV	17287542	17288523	98.577	984	8	5	0	1735
5SRNA	1	980	100	chrV	17288518	17289499	98.577	984	8	5	0	1735
5SRNA	1	980	100	chrV	17289494	17290475	98.577	984	8	5	0	1735
5SRNA	1	980	100	chrV	17290470	17291451	98.577	984	8	5	0	1735
5SRNA	1	980	100	chrV	17291446	17292426	98.476	984	8	6	0	1727
5SRNA	1	980	100	chrV	17292421	17293402	98.577	984	8	5	0	1735
5SRNA	1	980	100	chrV	17295674	17296654	98.476	984	8	6	0	1727
5SRNA	1	980	100	chrV	17296649	17297630	98.577	984	8	5	0	1735
5SRNA	1	980	100	chrV	17297625	17298606	98.476	984	9	5	0	1729
5SRNA	1	980	100	chrV	17298601	17299582	98.476	984	9	5	0	1729
5SRNA	1	980	100	chrV	17299577	17300557	98.374	984	9	6	0	1722
5SRNA	1	980	100	chrV	17300552	17301532	98.476	984	8	6	0	1727
5SRNA	1	980	100	chrV	17301527	17302508	98.476	984	9	5	0	1729
5SRNA	1	980	100	chrV	17302503	17303484	98.374	984	10	5	0	1724
5SRNA	1	980	100	chrV	17303479	17304458	98.272	984	9	7	0	1716
5SRNA	1	980	100	chrV	17304453	17305430	97.967	984	10	6	0	1698
5SRNA	1	980	100	chrV	17305425	17306403	98.171	984	9	7	0	1709
5SRNA	1	980	100	chrV	17306398	17307375	98.069	984	9	6	0	1703
5SRNA	1	980	100	chrV	17307370	17308351	98.374	984	10	5	0	1724
5SRNA	1	980	100	chrV	17308346	17309323	97.967	984	10	6	0	1698
5SRNA	1	980	100	chrV	17309318	17310295	97.967	984	10	6	0	1698
5SRNA	1	980	100	chrV	17310290	17311273	97.273	990	11	9	0	1664
18S/28S	1	7203	100	chrI	15315510	15322712	100	7203	0	0	0	13302
18S/28S	1	7203	100	chrI	15322707	15329909	100	7203	0	0	0	13302
pSX1	1	169	98.2558	chrV	1119767	1119935	97.633	169	4	0	3.68e-78	291
pSX1	1	169	98.2558	chrV	1120640	1120808	97.633	169	4	0	3.68e-78	291
pSX1	1	169	98.2558	chrV	1121648	1121816	97.633	169	4	0	3.68e-78	291
pSX1	1	169	98.2558	chrV	1124517	1124685	97.633	169	4	0	3.68e-78	291
pSX1	1	169	98.2558	chrV	1125471	1125639	97.633	169	4	0	3.68e-78	291
pSX1	1	169	98.2558	chrV	1129014	1129182	97.633	169	4	0	3.68e-78	291
pSX1	1	169	98.2558	chrV	1129968	1130136	97.633	169	4	0	3.68e-78	291
pSX1	1	172	100	chrX	122066	121895	97.093	172	5	0	3.67e-78	291
pSX1	1	170	98.8372	chrX	317599	317769	99.415	171	0	1	1.02e-83	309
pSX1	1	172	100	chrX	317775	317943	98.256	172	0	2	2.2e-80	298
pSX1	1	169	98.2558	chrX	317944	318111	99.408	169	0	1	1.31e-82	305
pSX1	1	172	100	chrX	318114	318285	97.701	174	0	4	7.91e-80	296
pSX1	1	172	100	chrX	318286	318456	98.837	172	1	1	1.31e-82	305
pSX1	1	172	100	chrX	318457	318627	99.419	172	0	1	2.83e-84	311
pSX1	1	172	100	chrX	318628	318797	98.837	172	0	2	1.31e-82	305
pSX1	1	172	100	chrX	318798	318969	100	172	0	0	1.69e-86	318
pSX1	1	170	98.8372	chrX	318970	319137	98.824	170	0	2	1.7e-81	302
pSX1	1	172	100	chrX	319141	319310	97.674	172	2	2	2.85e-79	294
pSX1	1	172	100	chrX	319311	319481	98.837	172	1	1	1.31e-82	305
pSX1	1	172	100	chrX	319482	319652	99.419	172	0	1	2.83e-84	311
pSX1	1	172	100	chrX	319653	319824	100	172	0	0	1.69e-86	318
pSX1	1	172	100	chrX	319825	319997	99.422	173	0	1	7.86e-85	313
pSX1	1	172	100	chrX	319998	320168	99.419	172	0	1	2.83e-84	311
pSX1	1	172	100	chrX	320169	320338	98.837	172	0	2	1.31e-82	305
pSX1	1	172	100	chrX	320339	320510	100	172	0	0	1.69e-86	318
pSX1	1	172	100	chrX	320511	320682	100	172	0	0	1.69e-86	318
pSX1	1	172	100	chrX	320683	320854	98.837	172	2	0	3.66e-83	307
pSX1	1	172	100	chrX	320855	321026	100	172	0	0	1.69e-86	318
pSX1	1	172	100	chrX	321027	321198	100	172	0	0	1.69e-86	318
pSX1	1	172	100	chrX	321199	321370	100	172	0	0	1.69e-86	318
pSX1	1	172	100	chrX	321371	321542	100	172	0	0	1.69e-86	318
pSX1	1	172	100	chrX	321543	321714	100	172	0	0	1.69e-86	318
pSX1	1	172	100	chrX	321715	321886	100	172	0	0	1.69e-86	318
pSX1	1	172	100	chrX	321887	322056	98.837	172	0	2	1.31e-82	305
pSX1	1	172	100	chrX	322057	322228	100	172	0	0	1.69e-86	318
pSX1	1	172	100	chrX	322229	322400	98.837	172	2	0	3.66e-83	307
pSX1	1	172	100	chrX	322401	322572	100	172	0	0	1.69e-86	318
pSX1	1	172	100	chrX	322573	322744	100	172	0	0	1.69e-86	318
pSX1	1	172	100	chrX	322745	322916	98.837	172	2	0	3.66e-83	307
pSX1	1	172	100	chrX	322917	323089	99.422	173	0	1	7.86e-85	313
pSX1	1	172	100	chrX	323090	323261	99.419	172	1	0	7.86e-85	313
pSX1	1	172	100	chrX	323262	323433	100	172	0	0	1.69e-86	318
pSX1	1	172	100	chrX	323434	323605	98.837	172	2	0	3.66e-83	307
pSX1	1	172	100	chrX	323606	323777	98.837	172	2	0	3.66e-83	307
pSX1	1	172	100	chrX	323778	323948	99.419	172	0	1	2.83e-84	311
pSX1	1	172	100	chrX	323949	324121	98.844	173	1	1	3.66e-83	307
pSX1	1	172	100	chrX	324122	324294	99.422	173	0	1	7.86e-85	313
pSX1	1	172	100	chrX	324295	324469	97.714	175	1	1	2.2e-80	298
pSX1	1	172	100	chrX	324470	324643	98.851	174	0	1	1.02e-83	309
pSX1	1	172	100	chrX	324644	324815	99.419	172	1	0	7.86e-85	313
pSX1	1	172	100	chrX	324816	324986	99.419	172	0	1	2.83e-84	311
pSX1	1	172	100	chrX	324987	325157	99.419	172	0	1	2.83e-84	311
pSX1	1	172	100	chrX	325158	325329	99.419	172	1	0	7.86e-85	313
pSX1	1	172	100	chrX	325330	325501	99.419	172	1	0	7.86e-85	313
pSX1	1	172	100	chrX	325502	325673	99.419	172	1	0	7.86e-85	313
pSX1	1	172	100	chrX	325674	325845	98.837	172	2	0	3.66e-83	307
pSX1	1	172	100	chrX	325846	326020	97.143	175	2	1	1.02e-78	292
pSX1	1	172	100	chrX	326021	326195	98.286	175	0	1	4.73e-82	303
pSX1	1	172	100	chrX	326196	326367	100	172	0	0	1.69e-86	318
pSX1	1	172	100	chrX	326368	326539	99.419	172	1	0	7.86e-85	313
pSX1	1	172	100	chrX	326540	326711	98.837	172	2	0	3.66e-83	307
pSX1	1	172	100	chrX	326712	326883	99.419	172	1	0	7.86e-85	313
pSX1	1	172	100	chrX	326884	327055	99.419	172	1	0	7.86e-85	313
pSX1	1	172	100	chrX	327056	327227	98.837	172	2	0	3.66e-83	307
pSX1	1	172	100	chrX	327228	327401	97.143	175	1	2	1.02e-78	292
pSX1	1	172	100	chrX	327402	327576	98.286	175	0	1	4.73e-82	303
pSX1	1	172	100	chrX	327577	327751	98.286	175	0	1	4.73e-82	303
pSX1	1	172	100	chrX	327752	327923	99.419	172	1	0	7.86e-85	313
pSX1	1	172	100	chrX	327924	328095	98.837	172	2	0	3.66e-83	307
pSX1	1	172	100	chrX	328096	328270	98.286	175	0	1	4.73e-82	303
pSX1	1	169	98.2558	chrX	328271	328439	98.225	169	3	0	7.91e-80	296
pSX1	1	172	100	chrX	328442	328616	98.286	175	0	1	4.73e-82	303
pSX1	1	172	100	chrX	328617	328787	98.256	172	2	1	6.12e-81	300
pSX1	1	172	100	chrX	328788	328959	99.419	172	1	0	7.86e-85	313
pSX1	1	172	100	chrX	328960	329131	99.419	172	1	0	7.86e-85	313
pSX1	1	172	100	chrX	329132	329306	98.286	175	0	1	4.73e-82	303
pSX1	1	169	98.2558	chrX	329307	329475	98.225	169	3	0	7.91e-80	296
pSX1	1	172	100	chrX	329478	329652	98.286	175	0	1	4.73e-82	303
pSX1	1	172	100	chrX	329653	329824	98.256	172	3	0	1.7e-81	302
pSX1	1	172	100	chrX	329825	329996	98.837	172	2	0	3.66e-83	307
pSX1	1	172	100	chrX	329997	330168	98.837	172	2	0	3.66e-83	307
pSX1	1	172	100	chrX	330169	330340	99.419	172	1	0	7.86e-85	313
pSX1	1	172	100	chrX	330341	330515	98.286	175	0	1	4.73e-82	303
pSX1	1	169	98.2558	chrX	330516	330684	98.225	169	3	0	7.91e-80	296
pSX1	1	172	100	chrX	330687	330861	98.286	175	0	1	4.73e-82	303
pSX1	1	172	100	chrX	330862	331033	98.256	172	3	0	1.7e-81	302
pSX1	1	169	98.2558	chrX	331034	331202	98.225	169	3	0	7.91e-80	296
pSX1	1	172	100	chrX	331205	331379	98.286	175	0	1	4.73e-82	303
pSX1	1	172	100	chrX	331380	331551	98.256	172	3	0	1.7e-81	302
pSX1	1	169	98.2558	chrX	331552	331720	98.225	169	3	0	7.91e-80	296
pSX1	1	172	100	chrX	331723	331897	98.286	175	0	1	4.73e-82	303
pSX1	1	172	100	chrX	331898	332069	98.256	172	3	0	1.7e-81	302
pSX1	1	172	100	chrX	332070	332241	98.837	172	2	0	3.66e-83	307
pSX1	1	169	98.2558	chrX	332242	332410	98.225	169	3	0	7.91e-80	296
pSX1	1	172	100	chrX	332413	332587	97.143	175	2	1	1.02e-78	292
pSX1	1	169	98.2558	chrX	332588	332756	98.225	169	3	0	7.91e-80	296
pSX1	1	172	100	chrX	332759	332933	98.286	175	0	1	4.73e-82	303
pSX1	1	172	100	chrX	332934	333105	100	172	0	0	1.69e-86	318
pSX1	1	172	100	chrX	333106	333280	98.286	175	0	1	4.73e-82	303
pSX1	1	169	98.2558	chrX	333281	333449	100	169	0	0	7.86e-85	313
pSX1	1	172	100	chrX	333452	333626	98.286	175	0	1	4.73e-82	303
pSX1	1	172	100	chrX	333627	333798	100	172	0	0	1.69e-86	318
pSX1	1	172	100	chrX	333799	333973	98.286	175	0	1	4.73e-82	303
pSX1	1	169	98.2558	chrX	333974	334142	100	169	0	0	7.86e-85	313
pSX1	1	172	100	chrX	334145	334319	98.286	175	0	1	4.73e-82	303
pSX1	1	172	100	chrX	334320	334491	99.419	172	1	0	7.86e-85	313
