# Supplementary material for: Recompleting the Caenorhabditis elegans genome
Source: HighWire-hosted journal article supplement (doi:10.1101/gr.244830.118), 2019-05-23
Supplement: Supplemental_Table_S13.xlsx [file Supplemental_Table_S13.xlsx]

## Sheet: VC2010_Supp_Table_13
gene	read ID	identity (%)	#matches	#mismatches	#indels	start	end	start	end	E value			average identity	88.4878
5SRNA	3f1486b2-6201-47ee-b062-66642a5bb8b0	88.218	1010	38	61	1	980	1751	793	0	1131
5SRNA	3f1486b2-6201-47ee-b062-66642a5bb8b0	87.79	991	47	53	22	980	2694	1746	0	1092
5SRNA	3f1486b2-6201-47ee-b062-66642a5bb8b0	87.789	909	36	55	96	980	3571	2714	0	994
5SRNA	3f1486b2-6201-47ee-b062-66642a5bb8b0	85.865	948	58	50	62	980	5125	4225	0	939
5SRNA	3f1486b2-6201-47ee-b062-66642a5bb8b0	84.507	994	62	73	28	980	6093	5151	0	898
5SRNA	3f1486b2-6201-47ee-b062-66642a5bb8b0	86.786	946	54	53	62	980	7016	6115	0	989
5SRNA	3f1486b2-6201-47ee-b062-66642a5bb8b0	81.078	1020	84	78	1	980	7991	7041	0	713
5SRNA	3f1486b2-6201-47ee-b062-66642a5bb8b0	88.515	1010	33	57	1	980	8942	7986	0	1146
5SRNA	3f1486b2-6201-47ee-b062-66642a5bb8b0	87.54	939	45	55	67	980	9828	8937	0	1020
5SRNA	3f1486b2-6201-47ee-b062-66642a5bb8b0	83.915	1032	61	72	1	980	11639	10661	0	889
5SRNA	3f1486b2-6201-47ee-b062-66642a5bb8b0	85.714	938	48	51	67	977	12515	11637	0	911
5SRNA	3f1486b2-6201-47ee-b062-66642a5bb8b0	88.747	942	41	51	62	980	14373	13474	0	1092
5SRNA	3f1486b2-6201-47ee-b062-66642a5bb8b0	83.284	1017	82	69	2	980	15358	14392	0	856
5SRNA	3f1486b2-6201-47ee-b062-66642a5bb8b0	85.045	1003	69	57	1	980	16298	15354	0	946
5SRNA	3f1486b2-6201-47ee-b062-66642a5bb8b0	89.222	1002	40	52	1	980	17248	16293	0	1190
5SRNA	3f1486b2-6201-47ee-b062-66642a5bb8b0	84.585	1012	67	65	1	980	18197	17243	0	922
5SRNA	3f1486b2-6201-47ee-b062-66642a5bb8b0	88.305	1009	37	64	1	980	19148	18192	0	1134
5SRNA	3f1486b2-6201-47ee-b062-66642a5bb8b0	88.69	1008	38	57	1	980	20102	19143	0	1160
5SRNA	3f1486b2-6201-47ee-b062-66642a5bb8b0	81.46	1014	89	74	1	980	21045	20097	0	739
5SRNA	3f1486b2-6201-47ee-b062-66642a5bb8b0	90.809	1001	26	47	1	980	21995	21040	0	1279
5SRNA	3f1486b2-6201-47ee-b062-66642a5bb8b0	86.766	1005	51	62	11	972	23527	22562	0	1044
5SRNA	3f1486b2-6201-47ee-b062-66642a5bb8b0	81.287	1010	100	63	1	980	25407	24457	0	736
5SRNA	3f1486b2-6201-47ee-b062-66642a5bb8b0	88.934	976	40	50	19	980	26323	25402	0	1142
5SRNA	3f1486b2-6201-47ee-b062-66642a5bb8b0	78.257	1021	101	88	2	980	27276	26335	1.12e-152	544
5SRNA	3f1486b2-6201-47ee-b062-66642a5bb8b0	88.711	1001	40	54	1	980	28220	27272	0	1155
5SRNA	3f1486b2-6201-47ee-b062-66642a5bb8b0	86.969	1013	60	54	2	980	29189	28215	0	1074
5SRNA	3f1486b2-6201-47ee-b062-66642a5bb8b0	87.948	1004	43	59	1	972	30148	29191	0	1112
5SRNA	3f1486b2-6201-47ee-b062-66642a5bb8b0	90.05	995	34	50	1	980	31087	30143	0	1229
5SRNA	3f1486b2-6201-47ee-b062-66642a5bb8b0	84.746	1003	73	63	1	980	32027	31082	0	931
5SRNA	3f1486b2-6201-47ee-b062-66642a5bb8b0	87.798	1008	53	54	1	980	32987	32022	0	1116
5SRNA	3f1486b2-6201-47ee-b062-66642a5bb8b0	88.765	988	49	49	10	980	33924	32982	0	1153
5SRNA	3f1486b2-6201-47ee-b062-66642a5bb8b0	85.447	1017	44	71	1	973	34888	33932	0	963
5SRNA	3f1486b2-6201-47ee-b062-66642a5bb8b0	89.521	1002	34	58	1	980	35835	34883	0	1203
5SRNA	3f1486b2-6201-47ee-b062-66642a5bb8b0	87.773	1006	50	55	1	980	39132	38174	0	1109
5SRNA	3f1486b2-6201-47ee-b062-66642a5bb8b0	89.829	993	39	43	1	972	40975	40024	0	1218
5SRNA	3f1486b2-6201-47ee-b062-66642a5bb8b0	80.876	1004	111	60	2	980	42365	41418	0	715
5SRNA	3f1486b2-6201-47ee-b062-66642a5bb8b0	89.575	988	43	46	1	972	43310	42367	0	1199
5SRNA	3f1486b2-6201-47ee-b062-66642a5bb8b0	87.685	1015	54	50	1	980	44283	43305	0	1116
5SRNA	3f1486b2-6201-47ee-b062-66642a5bb8b0	90.448	1005	40	42	1	980	46148	45175	0	1273
5SRNA	3f1486b2-6201-47ee-b062-66642a5bb8b0	90.3	1000	27	52	11	980	47102	46143	0	1245
5SRNA	3f1486b2-6201-47ee-b062-66642a5bb8b0	85.04	996	65	66	1	972	48048	47113	0	937
5SRNA	3f1486b2-6201-47ee-b062-66642a5bb8b0	88.288	999	48	46	1	980	48991	48043	0	1133
5SRNA	3f1486b2-6201-47ee-b062-66642a5bb8b0	84.5	1000	70	69	2	980	49921	48986	0	909
5SRNA	3f1486b2-6201-47ee-b062-66642a5bb8b0	85.271	998	54	60	1	980	51765	50843	0	942
5SRNA	3f1486b2-6201-47ee-b062-66642a5bb8b0	91.313	990	25	41	1	972	53653	52707	0	1295
5SRNA	3f1486b2-6201-47ee-b062-66642a5bb8b0	87.795	1016	31	65	1	980	54606	53648	0	1103
5SRNA	3f1486b2-6201-47ee-b062-66642a5bb8b0	89.786	1028	31	51	1	980	56525	55524	0	1249
5SRNA	3f1486b2-6201-47ee-b062-66642a5bb8b0	84.685	999	56	74	2	980	57441	56520	0	907
5SRNA	3f1486b2-6201-47ee-b062-66642a5bb8b0	85.238	989	59	65	1	965	58375	57450	0	937
5SRNA	3f1486b2-6201-47ee-b062-66642a5bb8b0	87.377	1014	42	66	1	980	59331	58370	0	1085
5SRNA	3f1486b2-6201-47ee-b062-66642a5bb8b0	86.07	1005	63	63	2	974	61297	60338	0	1009
5SRNA	3f1486b2-6201-47ee-b062-66642a5bb8b0	88.933	1003	36	55	1	980	63138	62188	0	1168
5SRNA	3f1486b2-6201-47ee-b062-66642a5bb8b0	91.165	996	38	38	1	980	64094	63133	0	1306
5SRNA	3f1486b2-6201-47ee-b062-66642a5bb8b0	86.364	1012	57	68	1	980	66772	65810	0	1029
5SRNA	3f1486b2-6201-47ee-b062-66642a5bb8b0	85.356	997	74	55	1	972	68594	67645	0	966
5SRNA	3f1486b2-6201-47ee-b062-66642a5bb8b0	89.71	1001	40	50	2	980	69548	68589	0	1219
5SRNA	3f1486b2-6201-47ee-b062-66642a5bb8b0	84.584	986	58	67	15	980	71384	70473	0	893
5SRNA	3f1486b2-6201-47ee-b062-66642a5bb8b0	87.551	988	36	63	1	972	74097	73181	0	1062
5SRNA	3f1486b2-6201-47ee-b062-66642a5bb8b0	88.154	937	33	60	63	980	74969	74092	0	1044
5SRNA	3f1486b2-6201-47ee-b062-66642a5bb8b0	85.119	1008	68	52	1	980	75969	75016	0	955
5SRNA	3f1486b2-6201-47ee-b062-66642a5bb8b0	90.981	1009	26	50	1	980	76936	75964	0	1299
5SRNA	3f1486b2-6201-47ee-b062-66642a5bb8b0	85.233	1009	59	66	2	980	77879	76931	0	955
5SRNA	3f1486b2-6201-47ee-b062-66642a5bb8b0	88.878	1007	45	52	1	980	78841	77875	0	1177
5SRNA	3f1486b2-6201-47ee-b062-66642a5bb8b0	84.51	1020	67	61	2	978	80295	79324	0	924
5SRNA	3f1486b2-6201-47ee-b062-66642a5bb8b0	83.036	1008	85	67	2	973	81256	80299	0	835
5SRNA	3f1486b2-6201-47ee-b062-66642a5bb8b0	88.634	1003	57	42	1	980	82220	81252	0	1168
5SRNA	3f1486b2-6201-47ee-b062-66642a5bb8b0	84.69	1032	58	69	1	980	83198	82215	0	939
18S/28S	b554f4fd-7206-4668-8cc6-e85c8e672cc9	89.814	7363	287	342	1	7203	14504	21563	0	9014
18S/28S	b554f4fd-7206-4668-8cc6-e85c8e672cc9	86.966	7396	375	423	1	7203	26036	33035	0	7773
18S/28S	b554f4fd-7206-4668-8cc6-e85c8e672cc9	88.75	7351	290	395	1	7203	37548	44509	0	8497
18S/28S	b554f4fd-7206-4668-8cc6-e85c8e672cc9	88.871	7413	275	414	1	7203	49024	56096	0	8612
18S/28S	b554f4fd-7206-4668-8cc6-e85c8e672cc9	89.146	7205	304	339	1	7058	60521	67394	0	8532
18S/28S	b554f4fd-7206-4668-8cc6-e85c8e672cc9	87.012	6922	332	417	2	6753	79086	85610	0	7278
pSX1	channel_122_75e5521e-4710-4f95-95ae-ae269452b4b3_qscore_9.3_read_score_-1.6	88.235	170	12	8	1	168	350	187	3.89e-49	196
pSX1	channel_122_75e5521e-4710-4f95-95ae-ae269452b4b3_qscore_9.3_read_score_-1.6	91.813	171	1	9	1	168	513	353	4.96e-58	226
pSX1	channel_122_75e5521e-4710-4f95-95ae-ae269452b4b3_qscore_9.3_read_score_-1.6	90	170	4	10	1	168	675	517	1.8e-52	207
pSX1	channel_122_75e5521e-4710-4f95-95ae-ae269452b4b3_qscore_9.3_read_score_-1.6	89.809	157	2	11	12	168	820	678	6.51e-47	189
pSX1	channel_122_75e5521e-4710-4f95-95ae-ae269452b4b3_qscore_9.3_read_score_-1.6	91.667	156	5	6	12	167	1289	1142	5e-53	209
pSX1	channel_122_75e5521e-4710-4f95-95ae-ae269452b4b3_qscore_9.3_read_score_-1.6	90.058	171	3	9	2	168	1459	1299	5e-53	209
pSX1	channel_122_75e5521e-4710-4f95-95ae-ae269452b4b3_qscore_9.3_read_score_-1.6	87.059	170	9	10	2	168	1621	1462	3.92e-44	180
pSX1	channel_122_75e5521e-4710-4f95-95ae-ae269452b4b3_qscore_9.3_read_score_-1.6	90.588	170	1	9	2	168	1781	1624	1.39e-53	211
pSX1	channel_122_75e5521e-4710-4f95-95ae-ae269452b4b3_qscore_9.3_read_score_-1.6	90.588	170	3	8	2	167	1944	1784	3.86e-54	213
pSX1	channel_122_75e5521e-4710-4f95-95ae-ae269452b4b3_qscore_9.3_read_score_-1.6	85.38	171	8	13	1	168	2254	2098	1.42e-38	161
pSX1	channel_122_75e5521e-4710-4f95-95ae-ae269452b4b3_qscore_9.3_read_score_-1.6	92.405	158	5	6	11	168	2407	2257	8.3e-56	219
pSX1	channel_122_75e5521e-4710-4f95-95ae-ae269452b4b3_qscore_9.3_read_score_-1.6	90.643	171	4	8	2	168	2580	2418	2.99e-55	217
pSX1	channel_122_75e5521e-4710-4f95-95ae-ae269452b4b3_qscore_9.3_read_score_-1.6	89.286	168	9	8	2	168	2742	2583	8.36e-51	202
pSX1	channel_122_75e5521e-4710-4f95-95ae-ae269452b4b3_qscore_9.3_read_score_-1.6	87.5	168	8	9	1	168	3067	2913	1.09e-44	182
pSX1	channel_122_75e5521e-4710-4f95-95ae-ae269452b4b3_qscore_9.3_read_score_-1.6	90.476	168	6	7	2	168	3229	3071	3.86e-54	213
pSX1	channel_122_75e5521e-4710-4f95-95ae-ae269452b4b3_qscore_9.3_read_score_-1.6	91.071	168	2	10	1	167	3387	3232	1.07e-54	215
pSX1	channel_122_75e5521e-4710-4f95-95ae-ae269452b4b3_qscore_9.3_read_score_-1.6	90.476	168	6	9	1	167	3549	3391	3.86e-54	213
pSX1	channel_122_75e5521e-4710-4f95-95ae-ae269452b4b3_qscore_9.3_read_score_-1.6	91.124	169	3	10	2	168	3710	3552	8.3e-56	219
pSX1	channel_122_75e5521e-4710-4f95-95ae-ae269452b4b3_qscore_9.3_read_score_-1.6	84.393	173	14	11	1	168	3877	3713	1.84e-37	158
pSX1	channel_122_75e5521e-4710-4f95-95ae-ae269452b4b3_qscore_9.3_read_score_-1.6	89.82	167	4	8	1	167	4033	3880	8.36e-51	202
pSX1	channel_122_75e5521e-4710-4f95-95ae-ae269452b4b3_qscore_9.3_read_score_-1.6	88.757	169	11	8	1	168	4349	4188	3.01e-50	200
pSX1	channel_122_75e5521e-4710-4f95-95ae-ae269452b4b3_qscore_9.3_read_score_-1.6	86.628	172	11	8	1	167	4680	4516	3.92e-44	180
pSX1	channel_122_75e5521e-4710-4f95-95ae-ae269452b4b3_qscore_9.3_read_score_-1.6	88.235	170	10	9	2	168	4845	4683	1.4e-48	195
pSX1	channel_122_75e5521e-4710-4f95-95ae-ae269452b4b3_qscore_9.3_read_score_-1.6	88.623	167	7	10	2	168	5308	5154	5.03e-48	193
pSX1	channel_122_75e5521e-4710-4f95-95ae-ae269452b4b3_qscore_9.3_read_score_-1.6	87.425	167	7	11	2	168	5618	5466	3.92e-44	180
pSX1	channel_122_75e5521e-4710-4f95-95ae-ae269452b4b3_qscore_9.3_read_score_-1.6	86.826	167	10	11	2	168	5776	5622	5.07e-43	176
pSX1	channel_122_75e5521e-4710-4f95-95ae-ae269452b4b3_qscore_9.3_read_score_-1.6	91.617	167	6	6	2	168	5937	5779	1.78e-57	224
pSX1	channel_122_75e5521e-4710-4f95-95ae-ae269452b4b3_qscore_9.3_read_score_-1.6	90.533	169	5	9	2	167	6100	5940	3.86e-54	213
pSX1	channel_122_75e5521e-4710-4f95-95ae-ae269452b4b3_qscore_9.3_read_score_-1.6	87.5	168	10	9	1	167	6260	6103	3.03e-45	183
pSX1	channel_122_75e5521e-4710-4f95-95ae-ae269452b4b3_qscore_9.3_read_score_-1.6	90.506	158	7	8	12	168	6411	6261	8.36e-51	202
pSX1	channel_122_75e5521e-4710-4f95-95ae-ae269452b4b3_qscore_9.3_read_score_-1.6	87.719	171	11	8	1	168	6584	6421	1.81e-47	191
pSX1	channel_122_75e5521e-4710-4f95-95ae-ae269452b4b3_qscore_9.3_read_score_-1.6	92.169	166	4	6	2	167	6898	6742	4.96e-58	226
pSX1	channel_122_75e5521e-4710-4f95-95ae-ae269452b4b3_qscore_9.3_read_score_-1.6	89.881	168	4	10	2	168	7056	6901	2.33e-51	204
pSX1	channel_122_75e5521e-4710-4f95-95ae-ae269452b4b3_qscore_9.3_read_score_-1.6	89.82	167	2	11	2	168	7371	7220	3.01e-50	200
pSX1	channel_122_75e5521e-4710-4f95-95ae-ae269452b4b3_qscore_9.3_read_score_-1.6	85.629	167	8	10	2	168	7843	7693	1.42e-38	161
pSX1	channel_122_75e5521e-4710-4f95-95ae-ae269452b4b3_qscore_9.3_read_score_-1.6	87.571	177	4	11	2	168	8014	7846	6.51e-47	189
pSX1	channel_122_75e5521e-4710-4f95-95ae-ae269452b4b3_qscore_9.3_read_score_-1.6	89.308	159	3	7	12	168	8164	8018	2.34e-46	187
pSX1	channel_122_75e5521e-4710-4f95-95ae-ae269452b4b3_qscore_9.3_read_score_-1.6	89.412	170	7	8	2	168	8488	8327	2.33e-51	204
pSX1	channel_122_75e5521e-4710-4f95-95ae-ae269452b4b3_qscore_9.3_read_score_-1.6	86.826	167	8	7	2	168	8643	8491	1.82e-42	174
pSX1	channel_122_75e5521e-4710-4f95-95ae-ae269452b4b3_qscore_9.3_read_score_-1.6	88.024	167	4	11	2	168	8796	8646	3.03e-45	183
pSX1	channel_122_75e5521e-4710-4f95-95ae-ae269452b4b3_qscore_9.3_read_score_-1.6	89.222	167	5	9	2	168	8953	8800	3.89e-49	196
pSX1	channel_122_75e5521e-4710-4f95-95ae-ae269452b4b3_qscore_9.3_read_score_-1.6	88.344	163	9	9	1	160	9116	8961	2.34e-46	187
pSX1	channel_122_75e5521e-4710-4f95-95ae-ae269452b4b3_qscore_9.3_read_score_-1.6	84.431	167	15	7	2	167	9277	9121	2.37e-36	154
pSX1	channel_122_75e5521e-4710-4f95-95ae-ae269452b4b3_qscore_9.3_read_score_-1.6	88.166	169	5	12	2	168	9742	9587	2.34e-46	187
pSX1	channel_122_75e5521e-4710-4f95-95ae-ae269452b4b3_qscore_9.3_read_score_-1.6	88.623	167	10	7	2	168	9903	9746	1.4e-48	195
pSX1	channel_122_75e5521e-4710-4f95-95ae-ae269452b4b3_qscore_9.3_read_score_-1.6	90.476	168	6	10	2	168	10064	9906	3.86e-54	213
pSX1	channel_122_75e5521e-4710-4f95-95ae-ae269452b4b3_qscore_9.3_read_score_-1.6	92.308	169	4	9	2	168	10228	10067	1.07e-59	231
pSX1	channel_122_75e5521e-4710-4f95-95ae-ae269452b4b3_qscore_9.3_read_score_-1.6	88.554	166	5	8	2	167	10382	10231	6.51e-47	189
pSX1	channel_122_75e5521e-4710-4f95-95ae-ae269452b4b3_qscore_9.3_read_score_-1.6	90	170	6	7	2	167	10547	10385	5e-53	209
pSX1	channel_122_75e5521e-4710-4f95-95ae-ae269452b4b3_qscore_9.3_read_score_-1.6	92.771	166	3	7	2	167	10864	10708	1.07e-59	231
pSX1	channel_122_75e5521e-4710-4f95-95ae-ae269452b4b3_qscore_9.3_read_score_-1.6	90.698	172	3	8	2	168	11190	11027	2.99e-55	217
pSX1	channel_122_75e5521e-4710-4f95-95ae-ae269452b4b3_qscore_9.3_read_score_-1.6	88.235	170	7	10	2	168	11513	11354	1.81e-47	191
pSX1	channel_122_75e5521e-4710-4f95-95ae-ae269452b4b3_qscore_9.3_read_score_-1.6	87.5	168	4	11	2	167	11668	11516	1.41e-43	178
pSX1	channel_122_75e5521e-4710-4f95-95ae-ae269452b4b3_qscore_9.3_read_score_-1.6	90.446	157	3	10	12	168	11975	11831	3.89e-49	196
pSX1	channel_122_75e5521e-4710-4f95-95ae-ae269452b4b3_qscore_9.3_read_score_-1.6	91.279	172	6	8	1	168	12148	11982	4.96e-58	226
pSX1	channel_122_75e5521e-4710-4f95-95ae-ae269452b4b3_qscore_9.3_read_score_-1.6	92.899	169	4	7	1	167	12313	12151	6.37e-62	239
pSX1	channel_122_75e5521e-4710-4f95-95ae-ae269452b4b3_qscore_9.3_read_score_-1.6	92.216	167	2	8	2	167	12472	12316	4.96e-58	226
pSX1	channel_122_75e5521e-4710-4f95-95ae-ae269452b4b3_qscore_9.3_read_score_-1.6	85.799	169	9	12	2	168	12631	12476	1.1e-39	165
pSX1	channel_122_75e5521e-4710-4f95-95ae-ae269452b4b3_qscore_9.3_read_score_-1.6	90.058	171	9	7	1	168	12799	12634	1.07e-54	215
pSX1	channel_122_75e5521e-4710-4f95-95ae-ae269452b4b3_qscore_9.3_read_score_-1.6	88.095	168	8	11	2	167	12959	12802	6.51e-47	189
pSX1	channel_122_75e5521e-4710-4f95-95ae-ae269452b4b3_qscore_9.3_read_score_-1.6	88.304	171	8	9	1	168	13123	12962	1.4e-48	195
pSX1	channel_122_75e5521e-4710-4f95-95ae-ae269452b4b3_qscore_9.3_read_score_-1.6	88.953	172	6	10	2	168	13287	13124	3.01e-50	200
pSX1	channel_122_75e5521e-4710-4f95-95ae-ae269452b4b3_qscore_9.3_read_score_-1.6	94.675	169	4	4	2	168	13455	13290	1.76e-67	257
pSX1	channel_122_75e5521e-4710-4f95-95ae-ae269452b4b3_qscore_9.3_read_score_-1.6	90.588	170	8	5	2	168	13620	13456	8.3e-56	219
pSX1	channel_122_75e5521e-4710-4f95-95ae-ae269452b4b3_qscore_9.3_read_score_-1.6	84.483	174	12	9	2	168	13952	13787	1.84e-37	158
pSX1	channel_122_75e5521e-4710-4f95-95ae-ae269452b4b3_qscore_9.3_read_score_-1.6	91.071	168	8	6	2	168	14116	13955	2.31e-56	220
pSX1	channel_122_75e5521e-4710-4f95-95ae-ae269452b4b3_qscore_9.3_read_score_-1.6	92.994	157	0	10	12	167	14265	14119	8.3e-56	219
pSX1	channel_122_75e5521e-4710-4f95-95ae-ae269452b4b3_qscore_9.3_read_score_-1.6	89.241	158	5	10	12	168	14421	14275	2.34e-46	187
pSX1	channel_122_75e5521e-4710-4f95-95ae-ae269452b4b3_qscore_9.3_read_score_-1.6	91.667	168	5	7	1	168	14589	14431	1.78e-57	224
pSX1	channel_122_75e5521e-4710-4f95-95ae-ae269452b4b3_qscore_9.3_read_score_-1.6	92.357	157	5	6	12	167	14899	14749	2.99e-55	217
pSX1	channel_122_75e5521e-4710-4f95-95ae-ae269452b4b3_qscore_9.3_read_score_-1.6	92.453	159	2	7	11	168	15058	14909	8.3e-56	219
pSX1	channel_122_75e5521e-4710-4f95-95ae-ae269452b4b3_qscore_9.3_read_score_-1.6	89.941	169	6	9	1	167	15227	15068	1.8e-52	207
pSX1	channel_122_75e5521e-4710-4f95-95ae-ae269452b4b3_qscore_9.3_read_score_-1.6	88.024	167	3	11	2	168	15377	15228	1.09e-44	182
pSX1	channel_122_75e5521e-4710-4f95-95ae-ae269452b4b3_qscore_9.3_read_score_-1.6	87.719	171	3	13	1	168	15535	15380	3.03e-45	183
pSX1	channel_122_75e5521e-4710-4f95-95ae-ae269452b4b3_qscore_9.3_read_score_-1.6	89.222	167	12	5	1	167	15698	15538	2.33e-51	204
pSX1	channel_122_75e5521e-4710-4f95-95ae-ae269452b4b3_qscore_9.3_read_score_-1.6	88.304	171	4	11	2	168	15860	15702	1.81e-47	191
pSX1	channel_122_75e5521e-4710-4f95-95ae-ae269452b4b3_qscore_9.3_read_score_-1.6	88.166	169	10	8	1	167	16023	15863	5.03e-48	193
pSX1	channel_122_75e5521e-4710-4f95-95ae-ae269452b4b3_qscore_9.3_read_score_-1.6	89.412	170	5	9	2	168	16185	16026	8.36e-51	202
pSX1	channel_122_75e5521e-4710-4f95-95ae-ae269452b4b3_qscore_9.3_read_score_-1.6	91.667	156	4	6	12	167	16335	16189	1.8e-52	207
pSX1	channel_122_75e5521e-4710-4f95-95ae-ae269452b4b3_qscore_9.3_read_score_-1.6	84.53	181	8	15	2	168	16516	16342	1.42e-38	161
pSX1	channel_122_75e5521e-4710-4f95-95ae-ae269452b4b3_qscore_9.3_read_score_-1.6	88.623	167	6	12	2	168	16672	16519	1.81e-47	191
pSX1	channel_122_75e5521e-4710-4f95-95ae-ae269452b4b3_qscore_9.3_read_score_-1.6	85.207	169	7	12	2	168	16987	16835	1.84e-37	158
pSX1	channel_122_75e5521e-4710-4f95-95ae-ae269452b4b3_qscore_9.3_read_score_-1.6	92.353	170	2	8	2	168	17152	16991	1.07e-59	231
pSX1	channel_122_75e5521e-4710-4f95-95ae-ae269452b4b3_qscore_9.3_read_score_-1.6	92.216	167	5	7	2	168	17313	17155	3.84e-59	230
pSX1	channel_122_75e5521e-4710-4f95-95ae-ae269452b4b3_qscore_9.3_read_score_-1.6	89.241	158	11	4	12	168	17468	17316	5.03e-48	193
pSX1	channel_122_75e5521e-4710-4f95-95ae-ae269452b4b3_qscore_9.3_read_score_-1.6	83.529	170	10	14	2	167	17633	17478	5.14e-33	143
pSX1	channel_122_75e5521e-4710-4f95-95ae-ae269452b4b3_qscore_9.3_read_score_-1.6	83.626	171	10	15	2	168	17792	17636	1.43e-33	145
pSX1	channel_122_75e5521e-4710-4f95-95ae-ae269452b4b3_qscore_9.3_read_score_-1.6	92.262	168	4	9	2	168	18750	18591	3.84e-59	230
pSX1	channel_122_75e5521e-4710-4f95-95ae-ae269452b4b3_qscore_9.3_read_score_-1.6	93.491	169	4	7	1	168	19073	18911	1.37e-63	244
pSX1	channel_122_75e5521e-4710-4f95-95ae-ae269452b4b3_qscore_9.3_read_score_-1.6	88.757	169	7	9	2	168	19234	19076	3.89e-49	196
pSX1	channel_122_75e5521e-4710-4f95-95ae-ae269452b4b3_qscore_9.3_read_score_-1.6	88.136	177	5	10	1	168	19715	19546	3.89e-49	196
pSX1	channel_122_75e5521e-4710-4f95-95ae-ae269452b4b3_qscore_9.3_read_score_-1.6	87.425	167	3	14	1	167	19866	19718	5.07e-43	176
pSX1	channel_122_75e5521e-4710-4f95-95ae-ae269452b4b3_qscore_9.3_read_score_-1.6	91.617	167	0	12	2	167	20022	19869	8.3e-56	219
pSX1	channel_122_75e5521e-4710-4f95-95ae-ae269452b4b3_qscore_9.3_read_score_-1.6	90.964	166	2	9	2	167	20177	20025	1.39e-53	211
pSX1	channel_122_75e5521e-4710-4f95-95ae-ae269452b4b3_qscore_9.3_read_score_-1.6	87.5	168	7	8	2	166	20336	20180	1.09e-44	182
pSX1	channel_122_75e5521e-4710-4f95-95ae-ae269452b4b3_qscore_9.3_read_score_-1.6	87.719	171	8	11	2	168	20827	20666	2.34e-46	187
pSX1	channel_122_75e5521e-4710-4f95-95ae-ae269452b4b3_qscore_9.3_read_score_-1.6	87.5	168	9	7	2	168	20987	20831	3.03e-45	183
pSX1	channel_122_75e5521e-4710-4f95-95ae-ae269452b4b3_qscore_9.3_read_score_-1.6	90	160	4	8	14	168	21455	21303	3.89e-49	196
pSX1	channel_122_75e5521e-4710-4f95-95ae-ae269452b4b3_qscore_9.3_read_score_-1.6	89.809	157	8	7	11	167	22092	21944	1.4e-48	195
pSX1	channel_122_75e5521e-4710-4f95-95ae-ae269452b4b3_qscore_9.3_read_score_-1.6	86.471	170	12	10	1	168	22425	22265	5.07e-43	176
pSX1	channel_122_75e5521e-4710-4f95-95ae-ae269452b4b3_qscore_9.3_read_score_-1.6	86.127	173	4	14	2	168	22587	22429	8.48e-41	169
pSX1	channel_122_75e5521e-4710-4f95-95ae-ae269452b4b3_qscore_9.3_read_score_-1.6	91.124	169	4	8	2	167	22750	22590	8.3e-56	219
pSX1	channel_122_75e5521e-4710-4f95-95ae-ae269452b4b3_qscore_9.3_read_score_-1.6	89.286	168	7	7	2	168	23079	22922	3.01e-50	200
pSX1	channel_122_75e5521e-4710-4f95-95ae-ae269452b4b3_qscore_9.3_read_score_-1.6	89.82	167	10	5	2	168	23402	23243	1.8e-52	207
pSX1	channel_122_75e5521e-4710-4f95-95ae-ae269452b4b3_qscore_9.3_read_score_-1.6	88.953	172	4	12	1	168	23565	23405	1.08e-49	198
pSX1	channel_122_75e5521e-4710-4f95-95ae-ae269452b4b3_qscore_9.3_read_score_-1.6	87.261	157	8	10	12	168	23871	23727	8.48e-41	169
pSX1	channel_122_75e5521e-4710-4f95-95ae-ae269452b4b3_qscore_9.3_read_score_-1.6	89.349	169	9	7	1	168	24041	23881	2.33e-51	204
pSX1	channel_122_75e5521e-4710-4f95-95ae-ae269452b4b3_qscore_9.3_read_score_-1.6	92.262	168	3	5	1	168	24202	24045	3.84e-59	230
pSX1	channel_122_75e5521e-4710-4f95-95ae-ae269452b4b3_qscore_9.3_read_score_-1.6	88.024	167	6	12	2	168	24357	24205	8.42e-46	185
pSX1	channel_122_75e5521e-4710-4f95-95ae-ae269452b4b3_qscore_9.3_read_score_-1.6	87.059	170	13	8	2	168	24685	24522	3.03e-45	183
pSX1	channel_122_75e5521e-4710-4f95-95ae-ae269452b4b3_qscore_9.3_read_score_-1.6	89.286	168	8	8	2	168	25005	24847	8.36e-51	202
pSX1	channel_122_75e5521e-4710-4f95-95ae-ae269452b4b3_qscore_9.3_read_score_-1.6	86.391	169	8	11	2	168	25331	25176	2.36e-41	171
pSX1	channel_122_75e5521e-4710-4f95-95ae-ae269452b4b3_qscore_9.3_read_score_-1.6	88.69	168	8	7	2	168	25491	25334	1.4e-48	195
pSX1	channel_122_75e5521e-4710-4f95-95ae-ae269452b4b3_qscore_9.3_read_score_-1.6	88.235	170	10	9	2	168	26148	25986	1.4e-48	195
pSX1	channel_122_75e5521e-4710-4f95-95ae-ae269452b4b3_qscore_9.3_read_score_-1.6	86.228	167	12	10	2	167	26471	26315	2.36e-41	171
pSX1	channel_122_75e5521e-4710-4f95-95ae-ae269452b4b3_qscore_9.3_read_score_-1.6	88.095	168	11	8	2	167	26635	26475	1.81e-47	191
pSX1	channel_122_75e5521e-4710-4f95-95ae-ae269452b4b3_qscore_9.3_read_score_-1.6	82.941	170	11	13	2	168	26792	26638	2.39e-31	137
pSX1	channel_122_75e5521e-4710-4f95-95ae-ae269452b4b3_qscore_9.3_read_score_-1.6	90.964	166	1	8	4	168	26947	26795	1.39e-53	211
pSX1	channel_122_75e5521e-4710-4f95-95ae-ae269452b4b3_qscore_9.3_read_score_-1.6	86.391	169	8	11	1	168	27104	26950	2.36e-41	171
pSX1	channel_122_75e5521e-4710-4f95-95ae-ae269452b4b3_qscore_9.3_read_score_-1.6	87.647	170	2	12	2	168	27260	27107	3.92e-44	180
pSX1	channel_122_75e5521e-4710-4f95-95ae-ae269452b4b3_qscore_9.3_read_score_-1.6	84.211	171	9	12	2	167	27420	27263	3.07e-35	150
pSX1	channel_122_75e5521e-4710-4f95-95ae-ae269452b4b3_qscore_9.3_read_score_-1.6	91.72	157	6	7	12	168	27572	27423	1.39e-53	211
pSX1	channel_122_75e5521e-4710-4f95-95ae-ae269452b4b3_qscore_9.3_read_score_-1.6	91.071	168	5	8	2	168	27738	27580	8.3e-56	219
pSX1	channel_122_75e5521e-4710-4f95-95ae-ae269452b4b3_qscore_9.3_read_score_-1.6	86.471	170	5	10	1	167	27895	27741	2.36e-41	171
pSX1	channel_122_75e5521e-4710-4f95-95ae-ae269452b4b3_qscore_9.3_read_score_-1.6	87.647	170	7	12	1	168	28056	27899	8.42e-46	185
pSX1	channel_122_75e5521e-4710-4f95-95ae-ae269452b4b3_qscore_9.3_read_score_-1.6	92.814	167	5	6	2	168	28216	28057	8.25e-61	235
pSX1	channel_122_75e5521e-4710-4f95-95ae-ae269452b4b3_qscore_9.3_read_score_-1.6	88.235	170	11	8	1	168	28379	28217	1.4e-48	195
pSX1	channel_122_75e5521e-4710-4f95-95ae-ae269452b4b3_qscore_9.3_read_score_-1.6	86.31	168	11	6	2	167	28539	28382	6.56e-42	172
pSX1	channel_122_75e5521e-4710-4f95-95ae-ae269452b4b3_qscore_9.3_read_score_-1.6	89.308	159	10	7	13	168	28853	28699	5.03e-48	193
pSX1	channel_122_75e5521e-4710-4f95-95ae-ae269452b4b3_qscore_9.3_read_score_-1.6	90.476	168	5	8	1	168	29020	28864	1.39e-53	211
pSX1	channel_122_75e5521e-4710-4f95-95ae-ae269452b4b3_qscore_9.3_read_score_-1.6	86.55	171	13	8	2	167	29343	29178	3.92e-44	180
pSX1	channel_122_75e5521e-4710-4f95-95ae-ae269452b4b3_qscore_9.3_read_score_-1.6	90.361	166	7	8	2	167	29503	29347	5e-53	209
pSX1	channel_122_75e5521e-4710-4f95-95ae-ae269452b4b3_qscore_9.3_read_score_-1.6	90.566	159	5	7	12	168	29969	29819	8.36e-51	202
pSX1	channel_122_75e5521e-4710-4f95-95ae-ae269452b4b3_qscore_9.3_read_score_-1.6	87.059	170	13	8	2	167	30303	30139	3.03e-45	183
pSX1	channel_122_75e5521e-4710-4f95-95ae-ae269452b4b3_qscore_9.3_read_score_-1.6	85.89	163	10	10	2	162	30467	30316	1.42e-38	161
pSX1	channel_122_75e5521e-4710-4f95-95ae-ae269452b4b3_qscore_9.3_read_score_-1.6	89.222	167	10	6	2	168	31280	31122	8.36e-51	202
pSX1	channel_122_75e5521e-4710-4f95-95ae-ae269452b4b3_qscore_9.3_read_score_-1.6	88.535	157	5	7	12	168	31426	31283	1.41e-43	178
pSX1	channel_122_75e5521e-4710-4f95-95ae-ae269452b4b3_qscore_9.3_read_score_-1.6	84.884	172	13	10	1	167	31600	31437	1.42e-38	161
pSX1	channel_122_75e5521e-4710-4f95-95ae-ae269452b4b3_qscore_9.3_read_score_-1.6	86.471	170	6	10	2	168	31758	31603	2.36e-41	171
pSX1	channel_122_75e5521e-4710-4f95-95ae-ae269452b4b3_qscore_9.3_read_score_-1.6	92.262	168	7	5	1	167	31924	31762	2.97e-60	233
pSX1	channel_122_75e5521e-4710-4f95-95ae-ae269452b4b3_qscore_9.3_read_score_-1.6	91.566	166	7	7	2	167	32884	32726	6.42e-57	222
pSX1	channel_122_75e5521e-4710-4f95-95ae-ae269452b4b3_qscore_9.3_read_score_-1.6	92.899	169	1	7	1	168	33045	32887	8.25e-61	235
pSX1	channel_122_75e5521e-4710-4f95-95ae-ae269452b4b3_qscore_9.3_read_score_-1.6	91.925	161	6	5	11	168	33371	33215	8.3e-56	219
pSX1	channel_122_75e5521e-4710-4f95-95ae-ae269452b4b3_qscore_9.3_read_score_-1.6	91.083	157	8	5	12	167	33531	33380	1.8e-52	207
pSX1	channel_122_75e5521e-4710-4f95-95ae-ae269452b4b3_qscore_9.3_read_score_-1.6	92.442	172	2	9	2	167	33706	33540	8.25e-61	235
pSX1	channel_122_75e5521e-4710-4f95-95ae-ae269452b4b3_qscore_9.3_read_score_-1.6	88.554	166	8	9	2	167	34028	33874	1.81e-47	191
pSX1	channel_122_75e5521e-4710-4f95-95ae-ae269452b4b3_qscore_9.3_read_score_-1.6	88.69	168	9	8	1	167	34189	34031	3.89e-49	196
pSX1	channel_122_75e5521e-4710-4f95-95ae-ae269452b4b3_qscore_9.3_read_score_-1.6	88.095	168	8	7	2	168	34350	34194	6.51e-47	189
pSX1	channel_122_75e5521e-4710-4f95-95ae-ae269452b4b3_qscore_9.3_read_score_-1.6	87.719	171	4	12	1	168	34661	34505	3.03e-45	183
pSX1	channel_122_75e5521e-4710-4f95-95ae-ae269452b4b3_qscore_9.3_read_score_-1.6	92.814	167	2	9	2	168	34820	34664	2.97e-60	233
pSX1	channel_122_75e5521e-4710-4f95-95ae-ae269452b4b3_qscore_9.3_read_score_-1.6	89.205	176	3	9	2	167	34992	34823	6.46e-52	206
pSX1	channel_122_75e5521e-4710-4f95-95ae-ae269452b4b3_qscore_9.3_read_score_-1.6	91.124	169	1	10	2	168	35152	34996	2.99e-55	217
pSX1	channel_122_75e5521e-4710-4f95-95ae-ae269452b4b3_qscore_9.3_read_score_-1.6	92.405	158	5	7	12	168	35304	35153	8.3e-56	219
pSX1	channel_122_75e5521e-4710-4f95-95ae-ae269452b4b3_qscore_9.3_read_score_-1.6	87.64	178	9	9	2	168	35488	35313	1.4e-48	195
pSX1	channel_122_75e5521e-4710-4f95-95ae-ae269452b4b3_qscore_9.3_read_score_-1.6	90.446	157	4	9	2	156	35646	35499	3.89e-49	196
pSX1	channel_122_75e5521e-4710-4f95-95ae-ae269452b4b3_qscore_9.3_read_score_-1.6	89.881	168	3	10	1	168	35803	35650	2.33e-51	204
pSX1	channel_122_75e5521e-4710-4f95-95ae-ae269452b4b3_qscore_9.3_read_score_-1.6	90.058	171	4	10	1	167	35967	35806	5e-53	209
pSX1	channel_122_75e5521e-4710-4f95-95ae-ae269452b4b3_qscore_9.3_read_score_-1.6	92.262	168	3	10	1	168	36128	35971	3.84e-59	230
pSX1	channel_122_75e5521e-4710-4f95-95ae-ae269452b4b3_qscore_9.3_read_score_-1.6	87.135	171	5	13	1	166	36289	36131	1.41e-43	178
pSX1	channel_122_75e5521e-4710-4f95-95ae-ae269452b4b3_qscore_9.3_read_score_-1.6	90.588	170	4	8	2	168	36452	36292	1.07e-54	215
pSX1	channel_122_75e5521e-4710-4f95-95ae-ae269452b4b3_qscore_9.3_read_score_-1.6	90.173	173	3	9	1	168	36783	36620	3.86e-54	213
pSX1	channel_122_75e5521e-4710-4f95-95ae-ae269452b4b3_qscore_9.3_read_score_-1.6	85.465	172	9	14	1	167	36947	36787	1.1e-39	165
pSX1	channel_122_75e5521e-4710-4f95-95ae-ae269452b4b3_qscore_9.3_read_score_-1.6	88.824	170	3	12	2	167	37107	36950	1.4e-48	195
pSX1	channel_122_75e5521e-4710-4f95-95ae-ae269452b4b3_qscore_9.3_read_score_-1.6	88.199	161	10	9	11	168	37430	37276	3.03e-45	183
pSX1	channel_122_75e5521e-4710-4f95-95ae-ae269452b4b3_qscore_9.3_read_score_-1.6	90.361	166	5	7	2	167	37594	37440	1.8e-52	207
pSX1	channel_122_75e5521e-4710-4f95-95ae-ae269452b4b3_qscore_9.3_read_score_-1.6	87.861	173	4	13	2	168	37758	37597	2.34e-46	187
pSX1	channel_122_75e5521e-4710-4f95-95ae-ae269452b4b3_qscore_9.3_read_score_-1.6	92.814	167	2	7	2	168	37915	37759	2.97e-60	233
pSX1	channel_122_75e5521e-4710-4f95-95ae-ae269452b4b3_qscore_9.3_read_score_-1.6	92.262	168	5	7	2	167	38079	37918	1.07e-59	231
pSX1	channel_122_75e5521e-4710-4f95-95ae-ae269452b4b3_qscore_9.3_read_score_-1.6	85.629	167	12	8	2	168	38552	38398	1.1e-39	165
pSX1	channel_122_75e5521e-4710-4f95-95ae-ae269452b4b3_qscore_9.3_read_score_-1.6	92.593	162	5	6	2	160	38884	38727	4.96e-58	226
pSX1	channel_122_75e5521e-4710-4f95-95ae-ae269452b4b3_qscore_9.3_read_score_-1.6	89.474	171	4	11	1	168	39046	38887	2.33e-51	204
pSX1	channel_122_75e5521e-4710-4f95-95ae-ae269452b4b3_qscore_9.3_read_score_-1.6	86.164	159	8	11	12	168	39195	39049	5.1e-38	159
pSX1	channel_122_75e5521e-4710-4f95-95ae-ae269452b4b3_qscore_9.3_read_score_-1.6	89.873	158	3	10	12	168	39676	39531	1.81e-47	191
pSX1	channel_122_75e5521e-4710-4f95-95ae-ae269452b4b3_qscore_9.3_read_score_-1.6	89.535	172	9	6	1	168	39852	39686	5e-53	209
pSX1	channel_122_75e5521e-4710-4f95-95ae-ae269452b4b3_qscore_9.3_read_score_-1.6	91.72	157	6	7	12	168	40005	39856	1.39e-53	211
pSX1	channel_122_75e5521e-4710-4f95-95ae-ae269452b4b3_qscore_9.3_read_score_-1.6	84.091	176	7	16	2	167	40179	40015	3.07e-35	150
pSX1	channel_122_75e5521e-4710-4f95-95ae-ae269452b4b3_qscore_9.3_read_score_-1.6	89.759	166	8	7	2	166	40339	40182	2.33e-51	204
pSX1	channel_122_75e5521e-4710-4f95-95ae-ae269452b4b3_qscore_9.3_read_score_-1.6	90.698	172	6	8	1	167	40509	40343	2.31e-56	220
pSX1	channel_122_75e5521e-4710-4f95-95ae-ae269452b4b3_qscore_9.3_read_score_-1.6	91.617	167	3	8	2	167	40668	40512	2.31e-56	220
pSX1	channel_122_75e5521e-4710-4f95-95ae-ae269452b4b3_qscore_9.3_read_score_-1.6	91.617	167	3	8	1	167	40826	40671	2.31e-56	220
pSX1	channel_122_75e5521e-4710-4f95-95ae-ae269452b4b3_qscore_9.3_read_score_-1.6	86.55	171	10	11	1	168	41486	41326	5.07e-43	176
pSX1	channel_122_75e5521e-4710-4f95-95ae-ae269452b4b3_qscore_9.3_read_score_-1.6	88.757	169	11	8	2	167	41653	41490	3.01e-50	200
pSX1	channel_122_75e5521e-4710-4f95-95ae-ae269452b4b3_qscore_9.3_read_score_-1.6	81.065	169	14	14	2	167	41809	41656	8.66e-26	119
pSX1	channel_122_75e5521e-4710-4f95-95ae-ae269452b4b3_qscore_9.3_read_score_-1.6	82.857	175	17	11	2	168	41984	41815	1.43e-33	145
pSX1	channel_122_75e5521e-4710-4f95-95ae-ae269452b4b3_qscore_9.3_read_score_-1.6	87.059	170	11	9	2	168	42480	42319	1.09e-44	182
