# Supplementary material for: Recompleting the Caenorhabditis elegans genome
Source: HighWire-hosted journal article supplement (doi:10.1101/gr.244830.118), 2019-05-23
Supplement: Supplemental_Table_S14.xlsx [file Supplemental_Table_S14.xlsx]

## Sheet: VC2010_Supp_Table_14
Telomeres of VC2010
	5' end									3' end
	ce10			vc2010			difference (b)			ce10			vc2010 or Nanopore/Pacbio reads (red)			difference (b)
	unit sequence	number of units	length (b)	unit sequence	number of units	length (b)				unit sequence	number of units	length	unit sequence	number of units	length
chrI	GCCTAA	140	840	GCCTAA	446	2676	1836		chrI	TTAGGC	28.2	169.2	TTAGGC	804.3	4825.8	4656.6		Telomeric tandem repeats estimated from Nanopore or PacBio reads are colored red.
chrII	GCCTAA	28.8	172.8	GCCTAA	491.7	2950.2	2777.4		chrII	TTAGGC	31.7	190.2	TTAGGC	380	2280	2089.8
chrIII	GCCTAA	21.8	130.8	GCCTAA	533.8	3202.8	3072		chrIII	TTAGGC	35	210	TTAGGC	599.433	3596.6	3386.6
chrIV	GCCTAA	25	150	GCCTAA	946.8	5680.8	5530.8		chrIV	TTAGGC	35.3	211.8	TTAGGC	702.3	4213.8	4002
chrV	GCCTAA	53.8	322.8	GCCTAA	847.2	5083.2	4760.4		chrV	TTAGGC	30.8	184.8	TTAGGC	715.2	4291.2	4106.4
chrX	GCCTAA	43.7	262.2	GCCTAA	444.7	2668.2	2406		chrX	TTAGGC	23.5	141	TTAGGC	525.5	3153	3012
Total of differences (b)			41636							TTAGGC is the reverse complement of GCCTAA.
