# Supplementary material for: Recompleting the Caenorhabditis elegans genome
Source: HighWire-hosted journal article supplement (doi:10.1101/gr.244830.118), 2019-05-23
Supplement: Supplemental_Table_S15.xlsx [file Supplemental_Table_S15.xlsx]

## Sheet: VC2010_Supp_Table_15
Statistics of PacBio subreads
Strain	PD2182	PD2183
Number of Subreads	308682	962927
Average length	9356	6785
Total Bases	2888293347	6533682587
Statistics of assembled contigs (We used Canu assembler (ver. 1.4) to generate contigs and polished contigs using Quiver.)
Strain	PD2182	PD2183
Number of Contigs	294	328
Total Bases	102428077	106148824
Average length of Contigs	348395	323624
Max length	7275513	6260187
Min length	4394	1024
N10 contig length	5031113	5471581
N20 contig length	3152851	3362941
N30 contig length	2168485	2445810
N40 contig length	2070599	2145322
N50 contig length	1633247	1875204
N60 contig length	949902	1246358
N70 contig length	659584	1036148
N80 contig length	366307	783927
N90 contig length	171257	507673
N99 contig length	24697	13570
Base similarity with the N2 genome (ce10)
Mismatch ratio	0.0020943	0.00195
indel ratio	0.0008167	0.0006704
Mismatch and indel	0.002911	0.0026204
