# Supplementary material for: Recompleting the Caenorhabditis elegans genome
Source: HighWire-hosted journal article supplement (doi:10.1101/gr.244830.118), 2019-05-23
Supplement: Supplemental_Table_S16.xlsx [file Supplemental_Table_S16.xlsx]

## Sheet: VC2010_Supp_Table_16
Insertions into the VC2010 assembly											difference in length (bp)	108048
	N2 (ce10)			VC2010 genome			Classification using two outgroups strains
chr	start	end	length	start	end	length	PD2182	PD2183	PD2182 and PD2183		Classification using two outgroups strains	Frequency
chrI	533091	533078	13	534809	534929	121	misassembly in N2	misassembly in N2	misassembly in N2			PD2183	PD2183	PD2182-3
chrI	1059801	1059802	1	1078922	1079669	748	misassembly in N2	misassembly in N2	misassembly in N2		variant from N2 to VC2010	2	0	1
chrI	1250140	1249351	789	1272987	1273623	637	misassembly in N2	misassembly in N2	misassembly in N2		misassembly in N2	84	87	89
chrI	2263988	2263989	1	2294032	2295595	1564	misassembly in N2	misassembly in N2	misassembly in N2		undetermined	14	13	10
chrI	2652477	2652457	20	2693779	2693963	185	misassembly in N2	misassembly in N2	misassembly in N2
chrI	2893758	2893751	7	2935277	2935875	599	undetermined	misassembly in N2	misassembly in N2
chrI	3585040	3584910	130	3632482	3632687	206	misassembly in N2	misassembly in N2	misassembly in N2
chrI	4785681	4785682	1	4906739	4906865	127	misassembly in N2	misassembly in N2	misassembly in N2
chrI	5185173	5185166	7	5322234	5322419	186	misassembly in N2	misassembly in N2	misassembly in N2
chrI	6521300	6521296	4	6658726	6658954	229	misassembly in N2	misassembly in N2	misassembly in N2
chrI	8054367	8054346	21	8201902	8202145	244	misassembly in N2	misassembly in N2	misassembly in N2
chrI	8454800	8454797	3	8602707	8610721	8015	misassembly in N2	misassembly in N2	misassembly in N2
chrI	8660483	8660469	14	8816405	8816645	241	misassembly in N2	misassembly in N2	misassembly in N2
chrI	9631059	9631053	6	9787060	9787262	203	misassembly in N2	misassembly in N2	misassembly in N2
chrI	11175591	11175575	16	11382157	11382974	818	misassembly in N2	misassembly in N2	misassembly in N2
chrI	11511727	11511639	88	11722961	11723465	505	misassembly in N2	misassembly in N2	misassembly in N2
chrI	12738884	12738690	194	12960398	12960507	110	misassembly in N2	misassembly in N2	misassembly in N2
chrI	12864610	12864605	5	13086729	13086853	125	misassembly in N2	misassembly in N2	misassembly in N2
chrI	13462795	13462789	6	13693010	13693133	124	misassembly in N2	misassembly in N2	misassembly in N2
chrI	14279592	14279586	6	14523648	14524172	525	misassembly in N2	misassembly in N2	misassembly in N2
chrI	14292447	14292403	44	14537033	14537163	131	undetermined	misassembly in N2	misassembly in N2
chrII	2141133	2141122	11	2156792	2157442	651	undetermined	undetermined	undetermined
chrII	2472282	2472249	33	2489592	2490329	738	misassembly in N2	undetermined	misassembly in N2
chrII	2881317	2881192	125	2907073	2907628	556	undetermined	undetermined	undetermined
chrII	3836021	3833802	2219	3882389	3885370	2982	variant from N2 to VC2010	misassembly in N2	undetermined
chrII	6669182	6669151	31	6782337	6784988	2652	undetermined	undetermined	undetermined
chrII	7123997	7123592	405	7239842	7240736	895	undetermined	misassembly in N2	misassembly in N2
chrII	7371736	7371728	8	7488864	7489184	321	misassembly in N2	misassembly in N2	misassembly in N2
chrII	9937134	9937129	5	10056136	10056281	146	misassembly in N2	misassembly in N2	misassembly in N2
chrII	12606883	12605861	1022	12748228	12748588	361	misassembly in N2	misassembly in N2	misassembly in N2
chrII	12717366	12717298	68	12860037	12860507	471	undetermined	undetermined	undetermined
chrII	13738736	13738509	227	13902032	13909854	7823	undetermined	undetermined	undetermined
chrIII	347626	347567	59	358052	358356	305	misassembly in N2	misassembly in N2	misassembly in N2
chrIII	468055	467775	280	491946	492729	784	misassembly in N2	misassembly in N2	misassembly in N2
chrIII	1524761	1524711	50	1605564	1606365	802	misassembly in N2	misassembly in N2	misassembly in N2
chrIII	2326048	2325986	62	2432871	2433540	670	misassembly in N2	misassembly in N2	misassembly in N2
chrIII	2514165	2514156	9	2633326	2634065	740	misassembly in N2	misassembly in N2	misassembly in N2
chrIII	2893356	2893353	3	3012862	3013291	430	misassembly in N2	misassembly in N2	misassembly in N2
chrIII	2950982	2950954	28	3070916	3071514	599	undetermined	misassembly in N2	misassembly in N2
chrIII	2956902	2956870	32	3077462	3078215	754	undetermined	misassembly in N2	misassembly in N2
chrIII	3468251	3468252	1	3601927	3602039	113	misassembly in N2	misassembly in N2	misassembly in N2
chrIII	5779197	5779132	65	5957971	5958292	322	misassembly in N2	misassembly in N2	misassembly in N2
chrIV	427557	427478	79	433661	433969	309	misassembly in N2	misassembly in N2	misassembly in N2
chrIV	1236106	1236085	21	1243037	1243471	435	misassembly in N2	misassembly in N2	misassembly in N2
chrIV	1280127	1288631	8504	1287515	1302600	15086	misassembly in N2	misassembly in N2	misassembly in N2
chrIV	1971417	1971389	28	1991063	1991587	525	misassembly in N2	misassembly in N2	misassembly in N2
chrIV	2022974	2022955	19	2043406	2043955	550	misassembly in N2	misassembly in N2	misassembly in N2
chrIV	2025954	2025948	6	2046956	2047753	798	misassembly in N2	misassembly in N2	misassembly in N2
chrIV	2028010	2027915	95	2049815	2050018	204	misassembly in N2	misassembly in N2	misassembly in N2
chrIV	2374725	2374658	67	2397455	2400139	2685	misassembly in N2	misassembly in N2	misassembly in N2
chrIV	5950135	5950113	22	6017779	6017903	125	misassembly in N2	misassembly in N2	misassembly in N2
chrIV	7485250	7485241	9	7508878	7509308	431	misassembly in N2	misassembly in N2	misassembly in N2
chrIV	9538150	9538142	8	9597408	9598993	1586	misassembly in N2	misassembly in N2	misassembly in N2
chrIV	12688201	12688195	6	12852805	12852990	186	misassembly in N2	misassembly in N2	misassembly in N2
chrIV	16788528	16787222	1306	17039200	17045467	6268	misassembly in N2	misassembly in N2	misassembly in N2
chrIV	16938377	16938367	10	17196633	17197374	742	misassembly in N2	misassembly in N2	misassembly in N2
chrV	226043	226038	5	230824	231062	239	misassembly in N2	misassembly in N2	misassembly in N2
chrV	306878	306857	21	317352	317517	166	misassembly in N2	misassembly in N2	misassembly in N2
chrV	1764552	1764547	5	1811224	1811400	177	misassembly in N2	misassembly in N2	misassembly in N2
chrV	1772184	1772177	7	1819037	1819505	469	misassembly in N2	misassembly in N2	misassembly in N2
chrV	2083728	2083557	171	2131151	2131970	820	misassembly in N2	misassembly in N2	misassembly in N2
chrV	2600128	2600121	7	2541763	2541932	170	misassembly in N2	misassembly in N2	misassembly in N2
chrV	2646664	2646654	10	2594063	2594417	355	misassembly in N2	misassembly in N2	misassembly in N2
chrV	4248538	4248540	2	4220584	4220723	140	misassembly in N2	misassembly in N2	misassembly in N2
chrV	8158780	8158775	5	8216418	8216872	455	misassembly in N2	misassembly in N2	misassembly in N2
chrV	9026771	9026668	103	9068762	9070021	1260	misassembly in N2	misassembly in N2	misassembly in N2
chrV	9554034	9554027	7	9594467	9594688	222	misassembly in N2	misassembly in N2	misassembly in N2
chrV	9724713	9724707	6	9766329	9766909	581	misassembly in N2	misassembly in N2	misassembly in N2
chrV	10866881	10866290	591	10930002	10934442	4441	variant from N2 to VC2010	undetermined	variant from N2 to VC2010
chrV	11690783	11690764	19	11762189	11762416	228	misassembly in N2	misassembly in N2	misassembly in N2
chrV	12167434	12167406	28	12239088	12239192	105	misassembly in N2	misassembly in N2	misassembly in N2
chrV	12375520	12375954	434	12447295	12450408	3114	misassembly in N2	misassembly in N2	misassembly in N2
chrV	12864724	12864587	137	12955348	12955957	610	misassembly in N2	undetermined	misassembly in N2
chrV	13981976	13981531	445	14081137	14083229	2093	misassembly in N2	misassembly in N2	misassembly in N2
chrV	18002714	18002029	685	18217873	18220579	2707	undetermined	undetermined	undetermined
chrV	18118066	18117460	606	18353394	18354874	1481	undetermined	undetermined	undetermined
chrV	18211059	18214289	3230	18451544	18456839	5296	undetermined	undetermined	undetermined
chrV	18858883	18858778	105	19141192	19141336	145	undetermined	undetermined	undetermined
chrV	19877715	19877717	2	20187889	20188269	381	misassembly in N2	undetermined	misassembly in N2
chrX	1175670	1175664	6	1220669	1220871	203	misassembly in N2	misassembly in N2	misassembly in N2
chrX	1604376	1604366	10	1650676	1650845	170	misassembly in N2	misassembly in N2	misassembly in N2
chrX	1865600	1865581	19	1941051	1941272	222	misassembly in N2	misassembly in N2	misassembly in N2
chrX	2524908	2524891	17	2630696	2631436	741	misassembly in N2	misassembly in N2	misassembly in N2
chrX	3301745	3301742	3	3417649	3417990	342	misassembly in N2	misassembly in N2	misassembly in N2
chrX	6156113	6156114	1	6384710	6385140	431	misassembly in N2	misassembly in N2	misassembly in N2
chrX	7112275	7112255	20	7346889	7347071	183	misassembly in N2	misassembly in N2	misassembly in N2
chrX	7771490	7771355	135	8002977	8003523	547	misassembly in N2	misassembly in N2	misassembly in N2
chrX	7991101	7991025	76	8223271	8223449	179	misassembly in N2	misassembly in N2	misassembly in N2
chrX	8412193	8412184	9	8645362	8645742	381	misassembly in N2	misassembly in N2	misassembly in N2
chrX	8429638	8429631	7	8663196	8663384	189	misassembly in N2	misassembly in N2	misassembly in N2
chrX	8651685	8651678	7	8885726	8886221	496	misassembly in N2	misassembly in N2	misassembly in N2
chrX	8846736	8846667	69	9081279	9082542	1264	misassembly in N2	misassembly in N2	misassembly in N2
chrX	9078277	9078190	87	9314323	9314860	538	misassembly in N2	misassembly in N2	misassembly in N2
chrX	11311091	11310846	245	11586494	11592323	5830	misassembly in N2	misassembly in N2	misassembly in N2
chrX	13308040	13307957	83	13634120	13634614	495	misassembly in N2	misassembly in N2	misassembly in N2
chrX	14597607	14597532	75	14942291	14942484	194	misassembly in N2	misassembly in N2	misassembly in N2
chrX	15112172	15112168	4	15473561	15473786	226	misassembly in N2	misassembly in N2	misassembly in N2
chrX	15748077	15747727	350	16117651	16118180	530	misassembly in N2	misassembly in N2	misassembly in N2
chrX	15750345	15750335	10	16120802	16121179	378	misassembly in N2	misassembly in N2	misassembly in N2
chrX	16305633	16305568	65	16677157	16677322	166	misassembly in N2	misassembly in N2	misassembly in N2
