# Supplementary material for: Recompleting the Caenorhabditis elegans genome
Source: HighWire-hosted journal article supplement (doi:10.1101/gr.244830.118), 2019-05-23
Supplement: Supplemental_Table_S17.xlsx [file Supplemental_Table_S17.xlsx]

## Sheet: VC2010_Supp_Table_17
Deletions from the VC2010 assembly											difference in length (bp)	4464
	N2 (ce10)			VC2010 genome			Classification using two outgroups strains
chr	start	end	length	start	end	length	PD2182	PD2183	PD2182 and PD2183		Classification using two outgroups strains	Frequency
chrI	9490916	9491178	263	9647161	9647177	16	variant from N2 to VC2010	variant from N2 to VC2010	variant from N2 to VC2010			PD2183	PD2183	PD2182-3
chrI	14425413	14425688	276	14670166	14670185	19	variant from N2 to VC2010	variant from N2 to VC2010	variant from N2 to VC2010		variant from N2 to VC2010	4	4	4
chrIII	2564625	2565011	387	2684526	2684512	14	misassembly in N2	misassembly in N2	misassembly in N2		misassembly in N2	1	1	1
chrIII	12893508	12893646	139	13197544	13197524	20	variant from N2 to VC2010	variant from N2 to VC2010	variant from N2 to VC2010		undetermined	1	1	1
chrV	1645706	1647498	1793	1694240	1694248	8	variant from N2 to VC2010	variant from N2 to VC2010	variant from N2 to VC2010
chrV	15907130	15908735	1606	16049713	16049725	12	undetermined	undetermined	undetermined
