# Supplementary material for: Recompleting the Caenorhabditis elegans genome
Source: HighWire-hosted journal article supplement (doi:10.1101/gr.244830.118), 2019-05-23
Supplement: Supplemental_Table_S18.xlsx [file Supplemental_Table_S18.xlsx]

## Sheet: VC2010_Supp_Table_18
Duplicated regions in the N2 and VC2010 assemblies											difference in length (bp)	104202
	N2 (ce10)			VC2010 genome			Classification using two outgroups strains
chr	start	end	length	start	end	length	PD2182	PD2183	PD2182 and PD2183		Classification using two outgroups strains	Frequency
chrI	1001336	1002204	869	1019773	1021313	1541	variant from N2 to VC2010	variant from N2 to VC2010	variant from N2 to VC2010			PD2183	PD2183	PD2182-3
chrI	4186934	4187133	200	4251612	4251715	104	misassembly in N2	misassembly in N2	misassembly in N2		variant from N2 to VC2010	14	14	14
chrI	4760893	4762978	2086	4882734	4883774	1041	misassembly in N2	misassembly in N2	misassembly in N2		misassembly in N2	8	8	7
chrI	11406933	11407553	621	11618472	11618796	325	undetermined	undetermined	undetermined		undetermined	8	8	9
chrI	11577015	11577321	307	11788844	11789551	708	variant from N2 to VC2010	undetermined	variant from N2 to VC2010
chrII	1961408	1986160	24753	1983741	2001213	17473	undetermined	undetermined	undetermined
chrII	6630081	6630840	760	6742468	6743992	1525	variant from N2 to VC2010	misassembly in N2	undetermined
chrII	7801457	7801655	199	7920418	7920515	98	misassembly in N2	misassembly in N2	misassembly in N2
chrII	10122065	10122255	191	10241217	10241576	360	variant from N2 to VC2010	variant from N2 to VC2010	variant from N2 to VC2010
chrII	10920590	10922090	1501	11052105	11055180	3076	variant from N2 to VC2010	variant from N2 to VC2010	variant from N2 to VC2010
chrIII	158863	162348	3486	160453	167474	7022	undetermined	variant from N2 to VC2010	variant from N2 to VC2010
chrIII	1250176	1267046	16871	1306383	1331443	25061	undetermined	undetermined	undetermined
chrIII	4431207	4439607	8401	4566678	4580178	13501	variant from N2 to VC2010	variant from N2 to VC2010	variant from N2 to VC2010
chrIII	5507023	5509519	2497	5683535	5688287	4753	variant from N2 to VC2010	variant from N2 to VC2010	variant from N2 to VC2010
chrIII	6283088	6283212	125	6462889	6463167	279	misassembly in N2	misassembly in N2	misassembly in N2
chrIII	8336302	8352494	16193	8581540	8614246	32707	undetermined	undetermined	undetermined
chrIII	11503274	11503505	232	11808025	11808469	445	variant from N2 to VC2010	variant from N2 to VC2010	variant from N2 to VC2010
chrIV	7254346	7254835	490	7278232	7278463	232	misassembly in N2	misassembly in N2	misassembly in N2
chrIV	9852283	9852473	191	9913272	9913652	381	misassembly in N2	variant from N2 to VC2010	undetermined
chrIV	15352153	15354733	2581	15586813	15588093	1281	misassembly in N2	misassembly in N2	misassembly in N2
chrV	2625472	2634812	9341	2567276	2582216	14941	undetermined	undetermined	undetermined
chrV	6330060	6333018	2959	6344957	6350771	5815	variant from N2 to VC2010	variant from N2 to VC2010	variant from N2 to VC2010
chrV	8119256	8122554	3299	8173970	8180175	6206	variant from N2 to VC2010	variant from N2 to VC2010	variant from N2 to VC2010
chrV	13362613	13367077	4465	13453993	13462809	8817	variant from N2 to VC2010	variant from N2 to VC2010	variant from N2 to VC2010
chrV	14878152	14891282	13131	14992131	15011631	19501	undetermined	undetermined	undetermined
chrV	15426531	15435570	9040	15551323	15578233	26911	variant from N2 to VC2010	variant from N2 to VC2010	variant from N2 to VC2010
chrV	18703532	18725550	22019	18963526	19007461	43936	variant from N2 to VC2010	variant from N2 to VC2010	variant from N2 to VC2010
chrV	19428022	19431269	3248	19721818	19728363	6546	undetermined	undetermined	undetermined
chrV	19628236	19638776	10541	19925890	19946908	21019	variant from N2 to VC2010	variant from N2 to VC2010	variant from N2 to VC2010
chrX	14134973	14136962	1990	14461719	14462902	1184	misassembly in N2	misassembly in N2	misassembly in N2
