# Supplementary material for: Recompleting the Caenorhabditis elegans genome
Source: HighWire-hosted journal article supplement (doi:10.1101/gr.244830.118), 2019-05-23
Supplement: Supplemental_Table_S19.xlsx [file Supplemental_Table_S19.xlsx]

## Sheet: VC2010_Supp_Table_19
	Number of copies
	VC2010	N2 (ce10)	Different transposon occurrences
Tc1	31	31	one insertion into chrV and one deletion from chrV
Tc2	4	4
Tc3	22	22
Tc4	5	4	one insertion into chrII
Tc4v	2	2
Tc5	5	5
Tc6	17	16	one insertion into chrIV
Tc7	12	12
MARINCE1	10	10
MARINER2_CE	66	67	one duplication in the ce10 reference genome in chrV
Positions of different transposon occurrences
transposon	type	genome	accession	chromosome	identity (%)	length	start	end	Classification using two outgroups strains
Tc1	insertion	VC2010	X01005.1	chrV	99.441	1611	12448800	12450409	misassembly in N2
	deletion	ce10	X01005.1	chrV	99.752	1611	15907121	15908731	undetermined
Tc4	insertion	VC2010	M60788.1	chrII	98.705	1622	6782665	6784285	undetermined
Tc6	insertion	VC2010	L19187.1	chrIV	92.579	1617	9597383	9598994	misassembly in N2
MARINER2_CE	duplication	ce10	DF0001516	chrV	99.678	1242	2564118	2562877	undetermined
