# Supplementary material for: Recompleting the Caenorhabditis elegans genome
Source: HighWire-hosted journal article supplement (doi:10.1101/gr.244830.118), 2019-05-23
Supplement: Supplemental_Table_S21.xlsx [file Supplemental_Table_S21.xlsx]

## Sheet: VC2010_Supp_Table_21
Gene	VC2010-spec.	N2_same.strand	N2_opposite.strand	N2_genDNA	N2_perc_id	N2_E-value	VC2010_genDNA	VC_perc_id	VC_E-value	Cel_prot	Cel_perc_id	Cel_E-value	Cel_CDS_DNA	Cel.CDS_perc_id	Cel.CDS_E-value	Cni_prot	Cni_perc_id	Cni_E-value	Prot_size	Max_prot_size	Phobius	NCoils	Psegs	PFAM
chrI_pilon.g38	1+_nt			I:221448-220951	99.8	0	chrI_pilon:223281-222783	100	0	WBGene00004242|F18A11.1|puf-6	89.773	3.65e-111	WBGene00004243|B0273.2|puf-7	93.951	0	Cnig_chr_III.g9749	46.988	2.23e-41	191 aa	191			SEG: 0.11 (21/191)	PUF [PF00806.18]
chrI_pilon.g190	1+_exons	WBGene00022367|Y92H12BM.1		I:1379610-1379232	99.736	0	chrI_pilon:1415245-1414707	99.814	0	WBGene00022365|Y92H12BL.4	86.007	9.65e-172	WBGene00022365|Y92H12BL.4	99.724	0	Cnig_chr_I.g784	87.898	0	632 aa	632			SEG: 0.13 (80/632)	MyTH4 [PF00784.16]; RhoGAP [PF00620.26]; WW [PF00397.25]
chrI_pilon.g307	1+_exons	WBGene00000020|F12B6.1|abt-2		I:2257571-2257050	100	0	chrI_pilon:2287617-2287096	100	0	WBGene00000020|F12B6.1|abt-2	100	0	WBGene00000020|F12B6.1|abt-2	100	0	Cni-abt-2	84.987	0	1160-2313 aa	2313	TM(14x)		SEG: 0.04 (88/2313)	AAA_21 [PF13304.5]; ABC2_membrane_3 [PF12698.6]; ABC_tran [PF00005.26]
chrI_pilon.g503	1+_nt		WBGene00021036|W05F2.4	II:699092-694307	87.638	0	chrI_pilon:3435465-3440329	97.39	0	WBGene00020795|T25D1.3	87.671	3.6e-22	WBGene00020795|T25D1.3	93.023	1.71e-84				1622 aa	1622			SEG: 0.98 (1586/1622)	GLTT [PF01744.19]; PMG [PF05287.11]
chrI_pilon.g550	All_exons			I:3669368-3669058	100	1.16e-162	chrI_pilon:3721545-3721235	100	1.18e-162	WBGene00004890|D1037.2|smp-2	100	0	WBGene00004890|D1037.2|smp-2	100	0	Cni-smp-2	84.332	0	649 aa	649	SigP+TM(1x)		SEG: 0.03 (19/649)	Sema [PF01403.18]
chrI_pilon.g551	All_exons			I:3680797-3680439	100	0	chrI_pilon:3732974-3732616	100	0	WBGene00001501|D1037.3|ftn-2	100	2.57e-126	WBGene00001501|D1037.3|ftn-2	100	0	Cnig_chr_I.g1893	97.059	8.96e-123	170-201 aa	201			SEG: 0.07 (14/201)	Ferritin [PF00210.23]
chrI_pilon.g552	All_exons			I:3683661-3683271	100	0	chrI_pilon:3735838-3735448	100	0	WBGene00004272|D1037.4|rab-8	100	7.45e-156	WBGene00004272|D1037.4|rab-8	100	0	Cni-rab-8	98.104	2.02e-153	211 aa	211			SEG: 0.05 (10/211)	Arf [PF00025.20]; Gtr1_RagA [PF04670.11]; Ras [PF00071.21]; Roc [PF08477.12]; SRPRB [PF09439.9]
chrI_pilon.g553	All_exons			I:3685303-3685713	100	0	chrI_pilon:3737480-3737890	100	0	WBGene00017025|D1037.1	100	0	WBGene00017025|D1037.1	100	0	Cni-D1037.1	73.19	0	786 aa	786		NCoils: 0.04 (35/786)	SEG: 0.26 (208/786)	DND1_DSRM [PF14709.6]; G-patch [PF01585.22]; dsrm [PF00035.25]
chrI_pilon.g554	1+_exons			I:3691834-3691513	100	7.62e-169	chrI_pilon:3744012-3743691	100	7.76e-169	WBGene00017026|D1037.5|ipla-4	100	0	WBGene00017026|D1037.5|ipla-4	100	0	Cni-ipla-4	82.07	0	543-557 aa	557			SEG: 0.02 (12/557)	Ank_2 [PF12796.6]; Ank_4 [PF13637.5]; Ank_5 [PF13857.5]; Patatin [PF01734.21]
chrI_pilon.g1134	1+_nt		WBGene00000254|K04F10.4|bli-4	I:6352595-6350873	100	0	chrI_pilon:6490021-6488299	100	0							Cnig_chr_X.g22637	38.043	9.22e-13	716 aa	716		NCoils: 0.03 (21/716)	SEG: 0.06 (42/716)	Exo_endo_phos [PF03372.22]; Exo_endo_phos_2 [PF14529.5]; RVT_1 [PF00078.26]
chrI_pilon.g1590	All_exons						chrI_pilon:8607308-8607573	100	3.69e-138	WBGene00017785|F25E5.4	27.119	0.003				Cnig_chr_I.g2367	40	8.62e-14	90-201 aa	201	SigP			DUF316 [PF03761.14]
chrI_pilon.g1913	1+_nt			II:698570-697824	91.968	0	chrI_pilon:9977118-9977876	100	0	WBGene00020795|T25D1.3	71.622	6.08e-19	WBGene00021821|Y54B9A.1	87.329	9.26e-90	Cnig_chr_X.g22466	29.762	0.006	252 aa	252	TM(6x)		SEG: 0.89 (225/252)	GLTT [PF01744.19]
chrI_pilon.g2005	1+_exons	WBGene00013859|ZC247.1		I:10268720-10265201	98.58	0	chrI_pilon:10436876-10433340	100	0	WBGene00013859|ZC247.1	84.011	0	WBGene00013859|ZC247.1	98.731	0	Cni-ZC247.1	71.264	0	4149-4174 aa	4174			SEG: 0.01 (32/4174)	PqqA [PF08042.10]
chrI_pilon.g2006	1+_exons	WBGene00013859|ZC247.1		I:10277249-10266279	88.501	0	chrI_pilon:10461511-10449084	100	0	WBGene00013859|ZC247.1	88.943	0	WBGene00013859|ZC247.1	87.746	0	Cni-ZC247.1	80.239	0	4980-4994 aa	4994			SEG: 0.01 (63/4994)	HTH_psq [PF05225.15]
chrI_pilon.g2046	1+_nt			I:10462962-10462693	97.786	2.03e-129	chrI_pilon:10654177-10648871	98.268	0				WBGene00013163|Y53F4B.17	95.312	1.6e-20	Cnig_chr_I.g2182	41.237	0.000842	1779-1795 aa	1795				DUF3432 [PF11914.7]; DUF4924 [PF16271.4]; ET [PF01684.15]; INCENP_ARK-bind [PF03941.14]
chrI_pilon.g2207	1+_exons	WBGene00009220|F28D9.4		I:11175294-11175028	100	7.95e-139	chrI_pilon:11381852-11381586	100	8.09e-139	WBGene00009220|F28D9.4	100	3.07e-113	WBGene00009220|F28D9.4	100	0	Cnig_chr_I.g3614	81.25	9.45e-90	160 aa	160	TM(3x)		SEG: 0.20 (32/160)
chrI_pilon.g2413	1+_nt			I:12146049-12146245	100	1.04e-99	chrI_pilon:12369480-12369284	100	1.06e-99	WBGene00005529|F15H9.3|sri-17	80.077	2.47e-144	WBGene00005529|F15H9.3|sri-17	98.378	0	Cnig_chr_I.g3514	45.89	5.65e-44	244-252 aa	252	TM(4x)			7TM_GPCR_Srd [PF10317.8]; 7TM_GPCR_Srh [PF10318.8]; 7TM_GPCR_Sri [PF10327.8]; 7TM_GPCR_Srj [PF10319.8]; 7TM_GPCR_Str [PF10326.8]
chrI_pilon.g2840	1+_nt		WBGene00004875|F47G4.7|smd-1	I:14048676-14049133	99.782	0	chrI_pilon:14290369-14291109	100	0										246 aa	246			SEG: 0.54 (132/246)
chrI_pilon.g3014	All_exons			I:15067840-15067463	100	0	chrI_pilon:15321153-15320776	100	0							nigoni.pc_2016.07.11_067.g29008	100	2.55e-92	125 aa	125
chrII_pilon.g3171	1+_nt			II:699095-694359	91.444	0	chrII_pilon:706098-698140	100	0	WBGene00020795|T25D1.3	77.027	2.5e-19	WBGene00021821|Y54B9A.1	88.014	4.61e-92	Cnig_chr_X.g22466	26.298	1.32e-12	2652 aa	2652	SigP+TM(81x)		SEG: 0.97 (2565/2652)	GLTT [PF01744.19]
chrII_pilon.g3279	1+_nt			I:3390373-3393266	91.396	0	chrII_pilon:1047509-1044501	100	0	WBGene00020795|T25D1.3	86.486	1.95e-22	WBGene00020795|T25D1.3	93.488	2.26e-86	Cnig_chr_V.g17351	39.13	0.081	982-1002 aa	1002			SEG: 0.94 (941/1002)	GLTT [PF01744.19]; PMG [PF05287.11]
chrII_pilon.g3313	1+_nt		WBGene00018572|F47F6.1|lin-42	II:1250599-1251428	99.759	0	chrII_pilon:1258806-1259635	100	0										294 aa	294	TM(10x)		SEG: 0.87 (257/294)
chrII_pilon.g3353	1+_nt			II:1448763-1449300	90.441	0	chrII_pilon:1456947-1457514	90.669	0	WBGene00044439|Y51H7C.15	48.227	4.63e-18	WBGene00021187|Y9D1A.2	83.682	2.63e-54	Cnig_chr_IV.g12516	31.522	2.02e-05	190-191 aa	191			SEG: 0.15 (28/191)
chrII_pilon.g3998	1+_nt			II:3464826-3469843	88.398	0	chrII_pilon:3506021-3514048	94.973	0	WBGene00015903|C17E7.9	87.5	0.004				Cnig_chr_V.g16771	22.285	4.85e-39	2707-2710 aa	2710			SEG: 0.98 (2664/2710)
chrII_pilon.g4126	1+_exons	WBGene00015873|C17A2.5|oac-4		II:3835846-3835392	100	0	chrII_pilon:3882216-3881762	100	0	WBGene00015873|C17A2.5|oac-4	80.645	0	WBGene00015873|C17A2.5|oac-4	99.602	0	Cnig_chr_IV.g15184	65.99	1.11e-77	477-511 aa	511	TM(6x)		SEG: 0.10 (53/511)	Acyl_transf_3 [PF01757.21]
chrII_pilon.g4127	1+_exons	WBGene00015873|C17A2.5|oac-4		II:3838299-3837817	99.793	0	chrII_pilon:3889842-3889360	99.793	0	WBGene00015873|C17A2.5|oac-4	92.899	0	WBGene00015873|C17A2.5|oac-4	100	0	Cnig_chr_IV.g15186	55.62	0	364-1007 aa	1007	TM(11x)		SEG: 0.03 (33/1007)	Acyl_transf_3 [PF01757.21]; DUF1647 [PF07801.10]
chrII_pilon.g4487	1+_nt			II:5410483-5410772	100	1.56e-151	chrII_pilon:5503379-5503090	100	1.59e-151	WBGene00017135|EEED8.4	100	1.25e-142	WBGene00017135|EEED8.4	100	0	Cnig_chr_IV.g13570	68.649	1.2e-70	191 aa	191			SEG: 0.17 (33/191)	RRM_1 [PF00076.21]
chrII_pilon.g4680	1+_nt			II:6081937-6082206	99.63	4.25e-139	chrII_pilon:6176535-6176804	100	9.31e-141							Cnig_chr_IV.g13563	30.508	0.044	89 aa	89
chrII_pilon.g4701	1+_nt			II:7446168-7446441	92.806	1.48e-110	chrII_pilon:6283733-6283381	100	0	WBGene00021187|Y9D1A.2	69.725	2e-30	WBGene00021187|Y9D1A.2	92.607	1.02e-101	Cnig_chr_IV.g12516	38.961	4.32e-08	134 aa	134
chrII_pilon.g4731	1+_nt			II:6300898-6301138	100	4.94e-124	chrII_pilon:6399378-6399618	100	5.03e-124	WBGene00016213|C29F5.5	87.5	1.7e-45	WBGene00016213|C29F5.5	100	9.64e-101				341-342 aa	342			SEG: 0.08 (27/342)
chrII_pilon.g4827	1+_exons	WBGene00020576|T19D12.1		II:6671596-6672675	100	0	chrII_pilon:6787399-6788478	100	0	WBGene00020576|T19D12.1	95.662	0	WBGene00020576|T19D12.1	97.239	0	Cnig_chr_II.g5157	61.411	3.6e-80	1979-2038 aa	2038	TM(1x)		SEG: 0.42 (859/2038)
chrII_pilon.g4872	1+_nt			II:6819076-6818685	100	0	chrII_pilon:6934876-6934485	100	0	WBGene00010785|K12D12.1|top-2	63.818	2.78e-126	WBGene00010785|K12D12.1|top-2	88.472	8.04e-126	Cnig_chr_II.g6032	58.239	6.63e-114	131-296 aa	296				DNA_gyraseB [PF00204.24]; HATPase_c [PF02518.25]
chrII_pilon.g4945	1+_exons	WBGene00017344|F10E7.2		II:7123910-7124202	99.66	2.17e-151	chrII_pilon:7240991-7241284	100	1.32e-153	WBGene00017344|F10E7.2	97.656	6.26e-86	WBGene00017344|F10E7.2	99.734	0	Cnig_chr_II.g5278	63.043	0.000278	262 aa	262			SEG: 0.71 (185/262)
chrII_pilon.g5005	1+_nt			II:7372240-7372592	99.435	0	chrII_pilon:7489653-7490005	99.435	0	WBGene00011264|R13H4.6	36.364	9.2e-12	WBGene00018394|F43E2.6	95.706	6.3e-70				169 aa	169			SEG: 0.09 (15/169)
chrII_pilon.g5018	1+_nt			II:7444156-7441878	100	0	chrII_pilon:7561570-7559292	100	0	WBGene00019335|K02F6.1	47.558	8.28e-131	WBGene00018192|F39B3.3	97.847	0	Cnig_chr_X.g22683	42.586	0	1505-1570 aa	1570		NCoils: 0.01 (21/1570)	SEG: 0.10 (151/1570)	Asp_protease_2 [PF13650.5]; RVT_1 [PF00078.26]; gag-asp_proteas [PF13975.5]; rve [PF00665.25]; rve_3 [PF13683.5]
chrII_pilon.g5021	1+_exons	WBGene00021187|Y9D1A.2		II:7446999-7447437	99.772	0	chrII_pilon:7569465-7569030	100	0	WBGene00021186|Y9D1A.1	69.703	0	WBGene00021186|Y9D1A.1	95.312	0				488-507 aa	507			SEG: 0.09 (47/507)
chrII_pilon.g6216	1+_exons	WBGene00012585|Y38E10A.7|lips-15		II:12606212-12606685	97.89	0	chrII_pilon:12747501-12747974	100	0	WBGene00012585|Y38E10A.7|lips-15	94.755	0	WBGene00012585|Y38E10A.7|lips-15	97.038	0	Cnig_chr_II.g7582	57.192	3.12e-109	288 aa	288	SigP		SEG: 0.06 (17/288)	DUF676 [PF05057.13]; Lipase_2 [PF01674.17]
chrII_pilon.g6217	1+_exons	WBGene00012585|Y38E10A.7|lips-15		II:12606212-12606685	98.312	0	chrII_pilon:12748870-12749346	99.79	0	WBGene00012585|Y38E10A.7|lips-15	96.853	0	WBGene00012585|Y38E10A.7|lips-15	98.258	0	Cnig_chr_II.g7582	56.507	5.28e-110	286 aa	286	SigP		SEG: 0.06 (17/286)	DUF676 [PF05057.13]; Hydrolase_4 [PF12146.7]; Lipase_2 [PF01674.17]
chrII_pilon.g6234	1+_nt			II:12651507-12649528	92.641	0	chrII_pilon:12794172-12792189	100	0	WBGene00020795|T25D1.3	80.769	7.09e-20	WBGene00021821|Y54B9A.1	93.365	2.67e-84	Cni-Y69H2.10	31.414	0.093	709 aa	709			SEG: 0.95 (674/709)	GLTT [PF01744.19]
chrII_pilon.g6413	All_exons						chrII_pilon:13908936-13908656	100	1.48e-146	WBGene00011826|T18D3.9	50.602	1.28e-61				Cnig_chr_II.g6634	77.273	1.96e-101	176 aa	176	SigP+TM(3x)			Mpv17_PMP22 [PF04117.11]
chrII_pilon.g6640	All_exons	WBGene00044726|Y53F4B.43		II:14993098-14993380	99.647	6.53e-146	chrII_pilon:15220623-15220905	99.647	6.65e-146	WBGene00013172|Y53F4B.26	100	5.77e-105	WBGene00022692|ZK250.9	99.327	0	Cnig_chr_I.g129	32.222	0.000135	163-219 aa	219			SEG: 0.14 (30/219)	GETHR [PF05671.10]
chrII_pilon.g6641	All_exons	WBGene00044726|Y53F4B.43		II:14993098-14993403	99.673	7.32e-159	chrII_pilon:15220623-15220928	99.673	7.46e-159	WBGene00013172|Y53F4B.26	100	9.73e-112	WBGene00013154|Y53F4B.7	100	0	Cnig_chr_V.g18711	32.584	8.87e-06	152 aa	152			SEG: 0.20 (30/152)
chrII_pilon.g6642	1+_exons	WBGene00044726|Y53F4B.43		II:14993098-14993380	99.647	6.53e-146	chrII_pilon:15220623-15220905	99.647	6.65e-146	WBGene00013172|Y53F4B.26	100	5.77e-105	WBGene00022692|ZK250.9	99.327	0	Cnig_chr_I.g129	32.222	0.000135	152-219 aa	219			SEG: 0.14 (30/219)	GETHR [PF05671.10]
chrIII_pilon.g6718	1+_exons	WBGene00006894|T17A3.1|ver-1		III:157327-157947	100	0	chrIII_pilon:158923-159543	100	0	WBGene00006894|T17A3.1|ver-1	98.934	0	WBGene00006894|T17A3.1|ver-1	100	0	Cnig_chr_X.g23328	34.746	0	1563-1586 aa	1586	SigP+TM(2x)		SEG: 0.02 (30/1586)	I-set [PF07679.15]; Ig_2 [PF13895.5]; Ig_3 [PF13927.5]; Ig_5 [PF16681.4]; Pkinase [PF00069.24]; Pkinase_Tyr [PF07714.16]; V-set [PF07686.16]; ig [PF00047.24]
chrIII_pilon.g6908	All_exons			III:1254285-1253774	100	0	chrIII_pilon:1310384-1309873	100	0	WBGene00022496|Y119D3B.20|fbxa-92	100	1.77e-163	WBGene00022496|Y119D3B.20|fbxa-92	100	0	Cnig_chr_V.g21104	23.958	3.82e-12	218 aa	218				F-box [PF00646.32]; FTH [PF01827.26]
chrIII_pilon.g6909	All_exons			III:1258302-1257734	100	0	chrIII_pilon:1314401-1313833	100	0	WBGene00022495|Y119D3B.19|fbxa-78	100	0	WBGene00022495|Y119D3B.19|fbxa-78	100	0	nigoni.pc_2016.07.11_007.g27003	25.106	8.18e-11	277 aa	277				F-box [PF00646.32]; FTH [PF01827.26]
chrIII_pilon.g7050	All_exons			III:2111813-2111960	100	5.1e-73	chrIII_pilon:2213362-2213509	100	5.19e-73	WBGene00021701|Y48G9A.7	100	2.78e-51	WBGene00021701|Y48G9A.7	100	9.04e-120				76 aa	76
chrIII_pilon.g7126	All_exons			III:2562211-2562353	100	3.72e-70	chrIII_pilon:2682109-2682251	100	3.79e-70	WBGene00021848|Y54F10AM.1|nhr-239	96.341	9.69e-56	WBGene00021848|Y54F10AM.1|nhr-239	99.585	1.41e-123	Cni-nhr-239	91.463	3.41e-52	87-91 aa	91				zf-C4 [PF00105.17]
chrIII_pilon.g7127	1+_exons			III:2563823-2563050	100	0	chrIII_pilon:2683721-2682948	100	0	WBGene00021853|Y54F10AM.11	100	0	WBGene00021853|Y54F10AM.11	100	0	Cnig_chr_IV.g14326	29.67	2.21e-19	286 aa	286			SEG: 0.07 (21/286)	BTB [PF00651.30]
chrIII_pilon.g7336	1+_nt	WBGene00006575|F13B10.1|tir-1		V:15321536-15322346	93.842	0	chrIII_pilon:4031029-4030220	100	0	WBGene00020795|T25D1.3	71.233	1.38e-15	WBGene00021821|Y54B9A.1	93.701	2.7e-105	Cnig_chr_V.g17351	50.515	2.5e-05	269 aa	269			SEG: 0.94 (252/269)	GLTT [PF01744.19]; Pentapeptide_4 [PF13599.5]
chrIII_pilon.g7453	1+_exons	WBGene00007788|C28A5.1		III:4432307-4431504	100	0	chrIII_pilon:4567767-4566964	100	0	WBGene00007788|C28A5.1	100	0	WBGene00007788|C28A5.1	100	0	Cnig_chr_I.g1510	41.044	0	1223 aa	1223			SEG: 0.02 (26/1223)
chrIII_pilon.g7454	1+_exons	WBGene00007788|C28A5.1		III:4432307-4431504	100	0	chrIII_pilon:4567767-4566964	100	0	WBGene00007789|C28A5.2	99.836	0	WBGene00007789|C28A5.2	99.918	0	Cnig_chr_I.g1510	42.292	0	1218 aa	1218			SEG: 0.01 (9/1218)
chrIII_pilon.g7971	1+_nt			X:53879-54376	99.8	0	chrIII_pilon:6758392-6758890	100	0	WBGene00013610|Y102A5C.1|fbxa-206	30.526	6.14e-07				Cnig_chr_II.g7346	43.438	7.84e-86	285-310 aa	310			SEG: 0.04 (13/310)	Transposase_1 [PF01359.17]
chrIII_pilon.g8049	1+_nt		WBGene00004182|C06E8.3|prk-1	III:7000250-6998126	100	0	chrIII_pilon:7182307-7180183	100	0	WBGene00007406|C07A9.10	76.471	2.56e-18				Cnig_chr_IV.g15661	34.677	5.13e-87	1048-1051 aa	1051			SEG: 0.01 (8/1051)	Exo_endo_phos [PF03372.22]; RVT_1 [PF00078.26]
chrIII_pilon.g8160	1+_nt			III:7453256-7452621	90.723	0	chrIII_pilon:7684107-7683473	100	0							Cni-mth-1	34.266	1.42e-09	231 aa	231
chrIII_pilon.g8194	1+_nt			V:11108609-11108073	86.431	1.79e-156	chrV_pilon:11176740-11176204	86.431	1.82e-156										139-219 aa	219
chrIII_pilon.g8373	All_exons			III:8341407-8341667	100	1.27e-135	chrIII_pilon:8586713-8586973	100	1.29e-135	WBGene00019879|R05D3.5	71.084	2.79e-78	WBGene00022578|ZC262.1	100	3.13e-131	Cnig_chr_III.g9948	85.714	1.94e-49	120 aa	120				Motile_Sperm [PF00635.25]
chrIII_pilon.g8374	All_exons			III:8344154-8343771	100	0	chrIII_pilon:8589460-8589077	100	0	WBGene00043948|ZC262.7	100	3.74e-124	WBGene00043948|ZC262.7	100	0	Cni-unc-116	94.631	3.55e-94	252 aa	252	TM(1x)	NCoils: 0.25 (63/252)		Claudin_3 [PF06653.10]
chrIII_pilon.g8375	All_exons			III:8337770-8337504	100	8.73e-139	chrIII_pilon:8583076-8582810	100	8.89e-139	WBGene00044802|ZC262.10	100	1.63e-122	WBGene00044802|ZC262.10	100	0	Cnig_chr_III.g9943	39.623	1.79e-27	175 aa	175	SigP+TM(3x)			Claudin_3 [PF06653.10]
chrIII_pilon.g8376	All_exons			III:8339288-8338993	99.324	4.29e-151	chrIII_pilon:8584594-8584299	99.324	4.36e-151	WBGene00206477|ZC262.12	100	1.34e-101	WBGene00206477|ZC262.12	100	0	Cnig_chr_V.g20663	32.258	1.04e-14	147 aa	147	TM(3x)		SEG: 0.22 (32/147)	Claudin_3 [PF06653.10]
chrIII_pilon.g8377	All_exons			III:8341362-8341658	99.663	6.3e-154	chrIII_pilon:8586668-8586964	99.663	6.42e-154	WBGene00022578|ZC262.1	100	7.33e-97	WBGene00022578|ZC262.1	100	0	Cnig_chr_III.g9948	80.508	2.01e-67	131 aa	131	SigP		SEG: 0.13 (17/131)	Motile_Sperm [PF00635.25]
chrIII_pilon.g8378	1+_exons	WBGene00044801|ZC262.9		III:8344154-8343771	100	0	chrIII_pilon:8589460-8589077	100	0	WBGene00043948|ZC262.7	100	2.41e-124	WBGene00043948|ZC262.7	100	0	Cni-unc-116	94.631	6.52e-94	252-275 aa	275	SigP+TM(1x)	NCoils: 0.23 (63/275)		Claudin_3 [PF06653.10]
chrIII_pilon.g8490	1+_nt			III:8853817-8860625	100	0	chrIII_pilon:9124674-9139996	99.505	0	WBGene00018838|F54G2.2	32.734	2.75e-104				nigoni.pc_2016.07.11_033.g28757	49.507	0	1833-7454 aa	7454		NCoils: 0.01 (103/7454)	SEG: 0.39 (2891/7454)	RVT_1 [PF00078.26]; rve [PF00665.25]
chrIII_pilon.g8544	1+_exons	WBGene00013978|ZK507.1	WBGene00001609|F02A9.6|glp-1	III:9100651-9100389	100	3.18e-136	chrIII_pilon:9376441-9376179	100	3.24e-136	WBGene00013978|ZK507.1	99.698	0	WBGene00013978|ZK507.1	99.9	0	Cnig_chr_III.g10948	56.079	7.11e-146	373 aa	373				Pkinase [PF00069.24]; Pkinase_Tyr [PF07714.16]
chrIII_pilon.g8885	1+_nt		WBGene00009654|F43D9.3|sly-1	III:10515273-10514900	99.733	0	chrIII_pilon:10812639-10812265	100	0										124 aa	124	SigP		SEG: 0.10 (12/124)
chrIII_pilon.g9412	1+_nt			III:13750923-13750154	93.402	0	chrIII_pilon:14060452-14059685	100	0	WBGene00020795|T25D1.3	86.301	1.17e-23	WBGene00020795|T25D1.3	92.417	2.04e-81				255 aa	255			SEG: 0.89 (228/255)	GLTT [PF01744.19]
chrIII_pilon.g9423	All_exons			III:13782579-13782975	100	0	chrIII_pilon:14092188-14092584	100	0	WBGene00007025|K08E3.8|mdt-29	94.355	1.13e-72	WBGene00007025|K08E3.8|mdt-29	99.714	0	Cni-mdt-29	65.753	5.37e-49	146 aa	146			SEG: 0.22 (32/146)
chrIII_pilon.g9424	All_exons			III:13780228-13780575	100	0	chrIII_pilon:14089837-14090184	100	0	WBGene00007065|3R5.1|pot-3	100	1.91e-162	WBGene00007065|3R5.1|pot-3	100	0	Cnig_chr_I.g657	46.961	1.81e-45	215 aa	215				POT1PC [PF16686.4]
chrIII_pilon.g9425	All_exons			III:13778173-13778433	100	1.33e-135	chrIII_pilon:14087782-14088042	100	1.35e-135	WBGene00007025|K08E3.8|mdt-29	100	1.32e-80	WBGene00007025|K08E3.8|mdt-29	100	0	Cni-mdt-29	69.767	4.11e-63	125 aa	125				Med29 [PF11568.7]
chrIII_pilon.g9426	All_exons			III:13780228-13780563	100	4.66e-177	chrIII_pilon:14089837-14090172	100	4.74e-177	WBGene00007065|3R5.1|pot-3	98.14	3.38e-157	WBGene00007065|3R5.1|pot-3	98.148	0	Cnig_chr_I.g657	46.409	2.87e-43	171-211 aa	211				POT1PC [PF16686.4]
chrIII_pilon.g9427	All_exons			III:13782579-13782975	100	0	chrIII_pilon:14092188-14092584	100	0	WBGene00007025|K08E3.8|mdt-29	94.355	1.13e-72	WBGene00007025|K08E3.8|mdt-29	99.714	0	Cni-mdt-29	65.753	5.37e-49	146 aa	146			SEG: 0.22 (32/146)
chrIII_pilon.g9428	All_exons			III:13782579-13782928	100	0	chrIII_pilon:14092188-14092537	100	0	WBGene00007025|K08E3.8|mdt-29	95.973	8.59e-94	WBGene00007025|K08E3.8|mdt-29	99.767	0	Cni-mdt-29	70.253	4.87e-63	163 aa	163			SEG: 0.20 (32/163)	Med29 [PF11568.7]
chrIII_pilon.g9429	All_exons			III:13780228-13780563	100	4.66e-177	chrIII_pilon:14089837-14090172	100	4.74e-177	WBGene00007065|3R5.1|pot-3	98.14	3.38e-157	WBGene00007065|3R5.1|pot-3	98.148	0	Cnig_chr_I.g657	46.409	2.87e-43	171-211 aa	211				POT1PC [PF16686.4]
chrIII_pilon.g9430	All_exons			III:13778173-13778433	100	1.33e-135	chrIII_pilon:14087782-14088042	100	1.35e-135	WBGene00007025|K08E3.8|mdt-29	100	1.32e-80	WBGene00007025|K08E3.8|mdt-29	100	0	Cni-mdt-29	69.767	4.11e-63	125 aa	125				Med29 [PF11568.7]
chrIV_pilon.g9550	1+_nt			IV:698404-688738	97.581	0	chrIV_pilon:705289-695127	100	0	WBGene00010357|H03A11.2	27.762	9e-50				Cnig_chr_IV.g15239	73.757	0	2015-3456 aa	3456
chrIV_pilon.g9660	1+_exons	WBGene00022425|Y104H12BR.1|plst-1		IV:1289627-1290019	100	0	chrIV_pilon:1300851-1301306	100	0	WBGene00022425|Y104H12BR.1|plst-1	100	0	WBGene00022425|Y104H12BR.1|plst-1	100	0	Cnig_chr_IV.g15825	93.333	0	582-630 aa	630			SEG: 0.01 (9/630)	CAMSAP_CH [PF11971.7]; CH [PF00307.30]
chrIV_pilon.g9758	1+_exons			IV:2013774-2013052	100	0	chrIV_pilon:2034206-2033484	100	0	WBGene00022301|Y76B12C.7|cpsf-1	100	0	WBGene00022301|Y76B12C.7|cpsf-1	100	0	Cni-cpsf-1	82.801	0	1454 aa	1454		NCoils: 0.01 (21/1454)	SEG: 0.04 (56/1454)	CPSF_A [PF03178.14]; MMS1_N [PF10433.8]
chrIV_pilon.g10134	1+_nt			IV:4168127-4169891	100	0	chrIV_pilon:4231180-4232944	100	0	WBGene00010989|R03D7.2	75.949	2.48e-174	WBGene00009753|F46A8.10|scrm-6	96.284	2.27e-136	nigoni.pc_2016.07.11_043.g28866	28.265	2.19e-48	1053-1080 aa	1080	TM(5x)		SEG: 0.28 (302/1080)	AAA_11 [PF13086.5]; AAA_12 [PF13087.5]; AAA_30 [PF13604.5]; Scramblase [PF03803.14]; Viral_helicase1 [PF01443.17]
chrIV_pilon.g10309	1+_exons			IV:4921546-4922469	100	0	chrIV_pilon:4988403-4989326	100	0	WBGene00021821|Y54B9A.1	74.648	8.87e-26	WBGene00021821|Y54B9A.1	93.307	2.54e-103				528-538 aa	538	TM(13x)		SEG: 0.85 (457/538)	GETHR [PF05671.10]; GLTT [PF01744.19]
chrIV_pilon.g10717	1+_nt			IV:6921855-6922840	97.576	0	chrIV_pilon:6945297-6946481	100	0							Cnig_chr_X.g22388	29.858	4.14e-05	394 aa	394	SigP		SEG: 0.63 (247/394)	PRP4 [PF08799.10]
chrIV_pilon.g10898	1+_nt	WBGene00016845|C50F7.5		IV:7726719-7727450	97.541	0	chrIV_pilon:7759055-7760290	100	0	WBGene00016845|C50F7.5	97.89	4.99e-88	WBGene00016845|C50F7.5	97.541	0	Cni-C50F7.5	41.83	4.38e-37	411 aa	411	SigP		SEG: 0.72 (297/411)
chrIV_pilon.g11085	1+_exons			IV:8465562-8465238	100	9.23e-171	chrIV_pilon:8498981-8498657	100	9.39e-171	WBGene00003837|T01B11.7|oat-1	100	0	WBGene00003837|T01B11.7|oat-1	100	0	Cnig_chr_IV.g15325	81.618	2.1e-170	317 aa	317	TM(6x)		SEG: 0.06 (18/317)	GETHR [PF05671.10]; Sugar_tr [PF00083.23]
chrIV_pilon.g11226	1+_nt			IV:9066283-9067621	94.025	0	chrIV_pilon:9125035-9126372	100	0	WBGene00020795|T25D1.3	83.562	7.86e-21	WBGene00021821|Y54B9A.1	89.844	2.14e-88				445 aa	445			SEG: 0.98 (436/445)	GLTT [PF01744.19]
chrIV_pilon.g11307	1+_nt	WBGene00010150|F56D5.6		V:15321447-15322339	92.729	0	chrIV_pilon:9469786-9470725	100	0	WBGene00010150|F56D5.6	97.778	1.63e-25	WBGene00021821|Y54B9A.1	92.713	2.17e-97	Cnig_chr_IV.g13142	70	9.75e-15	356 aa	356	TM(9x)		SEG: 0.84 (300/356)	GLTT [PF01744.19]
chrIV_pilon.g11572	All_exons			IV:10950192-10950662	99.363	0	chrIV_pilon:10415016-10415486	100	0	WBGene00013474|Y69E1A.2	99.454	0	WBGene00013474|Y69E1A.2	99.092	0	Cnig_chr_III.g11671	89.402	0	366 aa	366				MFP2b [PF12150.7]
chrIV_pilon.g11573	All_exons			IV:10950192-10950662	99.363	0	chrIV_pilon:10415016-10415486	100	0	WBGene00013474|Y69E1A.2	99.454	0	WBGene00013474|Y69E1A.2	99.092	0	Cnig_chr_III.g11671	89.402	0	366 aa	366				MFP2b [PF12150.7]
chrIV_pilon.g11723	1+_exons			II:13598680-13599926	92.061	0	chrIV_pilon:11031352-11016020	96.124	0							Cnig_chr_V.g17598	30.986	0.000138	5075-5117 aa	5117			SEG: 0.02 (77/5117)	CobW_C [PF07683.13]; Spore_GerAC [PF05504.10]
chrIV_pilon.g11724	1+_nt			II:13598680-13599934	90.294	0	chrIV_pilon:11032934-11034516	99.937	0							Cnig_chr_V.g17173	33.981	2.23e-06	536-562 aa	562				GBP_repeat [PF02526.13]; INCENP_ARK-bind [PF03941.14]; PAS [PF00989.24]; Spore_GerAC [PF05504.10]
chrIV_pilon.g11733	1+_exons	WBGene00012794|Y43E12A.2		IV:10983103-10983340	99.167	1.07e-119	chrIV_pilon:11071401-11071638	99.167	1.09e-119	WBGene00012794|Y43E12A.2	100	0	WBGene00012794|Y43E12A.2	100	0	Cni-Y43E12A.2	92.509	1.86e-173	267 aa	267			SEG: 0.11 (29/267)	zf-3CxxC_2 [PF17180.3]; zf-CCHC_2 [PF13696.5]
chrIV_pilon.g11756	1+_exons			IV:11071574-11072355	95.038	0	chrIV_pilon:11172158-11172943	100	0	WBGene00000606|F11G11.10|col-17	21.809	1.19e-07				Cnig_chr_I.g3832	65.318	1.13e-76	176-433 aa	433			SEG: 0.64 (278/433)	Y_phosphatase [PF00102.26]
chrIV_pilon.g11757	All_exons			IV:11074026-11074609	98.459	0	chrIV_pilon:11182551-11183144	100	0										197 aa	197				EPTP [PF03736.16]; Pantoate_transf [PF02548.14]
chrIV_pilon.g11758	1+_exons			V:10605697-10612492	90.818	0	chrIV_pilon:11184993-11196215	97.2	0							nigoni.pc_2016.07.11_007.g27051	32.927	0.01	3507-3694 aa	3694
chrIV_pilon.g11889	1+_nt			IV:11616988-11616666	96.904	4.28e-152	chrIV_pilon:11733740-11734306	100	0	WBGene00021187|Y9D1A.2	67.89	2.8e-30	WBGene00021187|Y9D1A.2	88.627	2.48e-84	Cnig_chr_IV.g12516	37.209	2.37e-19	188 aa	188			SEG: 0.19 (36/188)
chrIV_pilon.g11890	1+_nt			IV:11616988-11616666	97.833	3.13e-158	chrIV_pilon:11744333-11743794	100	0	WBGene00021187|Y9D1A.2	66.964	6.78e-31	WBGene00021187|Y9D1A.2	86.786	8.47e-84	Cnig_chr_IV.g12516	36.975	6.33e-17	179 aa	179			SEG: 0.21 (37/179)
chrIV_pilon.g12368	1+_nt			IV:13734254-13735527	99.529	0	chrIV_pilon:13917740-13919013	100	0										1040-1072 aa	1072				Statherin [PF03875.12]
chrIV_pilon.g12449	1+_nt			I:3392838-3390527	91.393	0	chrIV_pilon:14419595-14417237	100	0	WBGene00021821|Y54B9A.1	87.143	1.86e-24	WBGene00020795|T25D1.3	93.023	8.31e-85	Cnig_chr_X.g23097	39.13	1.83e-12	793-794 aa	794				GETHR [PF05671.10]
chrIV_pilon.g12644	1+_nt			IV:15597528-15598692	99.914	0	chrIV_pilon:15831115-15832280	100	0	WBGene00017026|D1037.5|ipla-4	22.477	0.033				Cnig_chr_II.g7879	26.38	7.83e-07	585-588 aa	588		NCoils: 0.04 (21/588)	SEG: 0.01 (8/588)	Exo_endo_phos [PF03372.22]; Exo_endo_phos_2 [PF14529.5]
chrIV_pilon.g12733	All_exons			IV:16350990-16351601	100	0	chrIV_pilon:16601729-16601118	100	0	WBGene00007961|C35D6.4	100	3.91e-154	WBGene00007961|C35D6.4	100	0	Cnig_chr_IV.g15049	52.482	3.97e-47	203 aa	203			SEG: 0.10 (21/203)	zf-CCCH [PF00642.23]
chrIV_pilon.g12775	1+_exons	WBGene00012792|Y43D4A.6		IV:16787327-16787747	100	0	chrIV_pilon:17037970-17038390	100	0	WBGene00012792|Y43D4A.6	99.39	0	WBGene00012792|Y43D4A.6	99.595	0	Cnig_chr_V.g18517	42.586	4.27e-77	328 aa	328		NCoils: 0.06 (21/328)	SEG: 0.05 (16/328)	Pkinase [PF00069.24]; Pkinase_Tyr [PF07714.16]
chrV_pilon.g13194	1+_exons	WBGene00021736|Y50D4A.2|wrb-1; WBGene00021739|Y50D4A.5		V:1218673-1219789	100	0	chrV_pilon:1253692-1254808	100	0	WBGene00021735|Y50D4A.1	100	0	WBGene00021735|Y50D4A.1	100	0	Cnig_chr_V.g17991	39.748	2.25e-145	197-881 aa	881		NCoils: 0.03 (24/881)	SEG: 0.08 (69/881)
chrV_pilon.g13509	All_exons			V:2626334-2626166	100	1.65e-84	chrV_pilon:2568142-2567974	100	1.68e-84	WBGene00206511|W02H5.16	100	3.06e-77	WBGene00206511|W02H5.16	100	0	Cnig_chr_V.g18463	68.966	2.75e-21	102-113 aa	113	TM(2x)			7TM_GPCR_Srh [PF10318.8]
chrV_pilon.g13510	All_exons			V:2628648-2629054	99.509	0	chrV_pilon:2570456-2570862	99.509	0	WBGene00021679|Y48G1C.6	53.774	7.43e-31				Cnig_chr_V.g18107	48.515	3.65e-23	334-366 aa	366			SEG: 0.03 (11/366)	BrkDBD [PF09607.9]; DDE_1 [PF03184.18]; HTH_Tnp_Tc5 [PF03221.15]
chrV_pilon.g13520	1+_exons	WBGene00020955|W02G9.5|angl-1		V:2658762-2659165	100	0	chrV_pilon:2606523-2606926	100	0	WBGene00020955|W02G9.5|angl-1	99.792	0	WBGene00020955|W02G9.5|angl-1	100	0	Cni-angl-1	48.498	0	520-632 aa	632			SEG: 0.07 (44/632)	Exo_endo_phos [PF03372.22]
chrV_pilon.g13551	1+_nt			V:2777419-2777759	97.947	1.9e-168	chrV_pilon:2726802-2727143	100	1.14e-180	WBGene00005606|R05D8.2|srj-18	47.059	0.002				Cnig_chr_V.g18183	36.735	0.012	113 aa	113
chrV_pilon.g13552	1+_nt			V:2777419-2777789	97.305	4.4e-180	chrV_pilon:2727828-2728199	100	0	WBGene00005606|R05D8.2|srj-18	47.059	0.002							123 aa	123
chrV_pilon.g14140	1+_nt			V:5006581-5005771	87.183	0	chrV_pilon:4985358-4984564	100	0	WBGene00020795|T25D1.3	79.452	2.31e-22	WBGene00020795|T25D1.3	89.573	7.73e-71				264 aa	264			SEG: 0.71 (187/264)	GLTT [PF01744.19]
chrV_pilon.g14374	All_exons						chrV_pilon:6080422-6079856	100	0										188 aa	188			SEG: 0.06 (12/188)
chrV_pilon.g14390	All_exons	WBGene00006436|W06H8.8|ttn-1		V:6174231-6171682	92.728	0	chrV_pilon:6169184-6166566	100	0	WBGene00006436|W06H8.8|ttn-1	71.783	0	WBGene00006436|W06H8.8|ttn-1	92.172	0	Cnig_chr_III.g11421	20.833	9.18e-17	872 aa	872		NCoils: 0.68 (594/872)	SEG: 0.92 (800/872)
chrV_pilon.g14416	1+_exons	WBGene00020889|T28C12.2		V:6330438-6330791	100	0	chrV_pilon:6345323-6345676	100	0	WBGene00020889|T28C12.2	100	0	WBGene00020889|T28C12.2	100	0	Cnig_chr_V.g19824	85.155	0	485 aa	485	TM(12x)			MFS_1 [PF07690.15]
chrV_pilon.g14417	1+_exons	WBGene00020889|T28C12.2		V:6330438-6330791	100	0	chrV_pilon:6345323-6345676	100	0	WBGene00020889|T28C12.2	87.957	0	WBGene00020888|T28C12.1	88.206	0	Cnig_chr_V.g19824	78.495	0	432-473 aa	473	TM(12x)		SEG: 0.03 (13/473)	MFS_1 [PF07690.15]
chrV_pilon.g14548	All_exons			V:6091968-6091537	94.213	0	chrV_pilon:6964040-6963609	100	0	WBGene00020795|T25D1.3	71.233	4.02e-18	WBGene00021821|Y54B9A.1	92.727	4e-86				143 aa	143	TM(3x)		SEG: 0.83 (119/143)	GLTT [PF01744.19]
chrV_pilon.g14549	All_exons			V:6071965-6071579	94.574	1.29e-170	chrV_pilon:6966785-6966399	100	0	WBGene00020795|T25D1.3	71.233	2.68e-18	WBGene00021821|Y54B9A.1	93.182	7.68e-88				128 aa	128	TM(3x)		SEG: 0.81 (104/128)	GLTT [PF01744.19]
chrV_pilon.g14550	All_exons			V:6091968-6091537	94.444	0	chrV_pilon:6969740-6969309	100	0	WBGene00020795|T25D1.3	71.233	4.02e-18	WBGene00021821|Y54B9A.1	92.727	4e-86				143 aa	143	TM(3x)		SEG: 0.83 (119/143)	GLTT [PF01744.19]
chrV_pilon.g14894	1+_nt			V:8063888-8063247	96.979	0	chrV_pilon:8118600-8117939	100	0	WBGene00007392|C06H5.1|fbxa-156	42.951	6.06e-66				Cnig_chr_V.g21135	22.878	1.6e-09	325-354 aa	354	SigP		SEG: 0.08 (28/354)	FTH [PF01827.26]
chrV_pilon.g14909	1+_exons	WBGene00017020|D1014.7		V:8119281-8119532	100	5.82e-130	chrV_pilon:8173993-8174244	100	5.93e-130	WBGene00017020|D1014.7	100	0	WBGene00017020|D1014.7	100	0	Cnig_chr_V.g16546	65.773	0	506-521 aa	521	TM(1x)		SEG: 0.02 (13/521)	Glyco_transf_92 [PF01697.26]
chrV_pilon.g14910	1+_exons	WBGene00017020|D1014.7		V:8120103-8120351	100	2.6e-128	chrV_pilon:8176899-8177150	100	5.69e-130	WBGene00017019|D1014.6	88.05	0	WBGene00017019|D1014.6	89.552	0	Cnig_chr_V.g16546	73.207	0	500 aa	500	SigP			Glyco_transf_92 [PF01697.26]
chrV_pilon.g14917	1+_exons	WBGene00006309|D1014.1|sul-2		V:8157746-8158521	100	0	chrV_pilon:8215364-8216139	100	0	WBGene00006309|D1014.1|sul-2	86.971	0	WBGene00006309|D1014.1|sul-2	100	0	Cni-sul-2	92.185	0	561 aa	561	SigP		SEG: 0.01 (6/561)	Phosphodiest [PF01663.21]; Sulfatase [PF00884.22]; Sulfatase_C [PF14707.5]
chrV_pilon.g14965	1+_nt			V:8330671-8327790	97.745	0	chrV_pilon:8392814-8387768	99.98	0							Cnig_chr_V.g16770	38.901	2.1e-57	1726 aa	1726			SEG: 0.92 (1583/1726)
chrV_pilon.g15053	1+_nt		WBGene00022536|ZC178.2	V:8699746-8702442	98.332	0	chrV_pilon:8761879-8764572	100	0	WBGene00017101|E02H9.3	24.848	0.04	WBGene00022536|ZC178.2	98.297	0	Cnig_chr_IV.g12516	17.793	3.59e-25	897 aa	897			SEG: 0.47 (426/897)
chrV_pilon.g15054	All_exons		WBGene00022536|ZC178.2	V:8699806-8701116	96.799	0	chrV_pilon:8764639-8765952	100	0				WBGene00022536|ZC178.2	96.73	0	Cnig_chr_IV.g12516	18.112	3.3e-10	437 aa	437			SEG: 0.44 (193/437)
chrV_pilon.g15055	All_exons		WBGene00022536|ZC178.2	V:8699446-8702862	95.993	0	chrV_pilon:8766019-8769432	100	0				WBGene00022536|ZC178.2	96.142	0	Cnig_chr_IV.g12516	18.395	1.32e-24	1137 aa	1137			SEG: 0.57 (643/1137)
chrV_pilon.g15056	All_exons		WBGene00022536|ZC178.2	V:8699986-8701056	96.269	0	chrV_pilon:8769499-8770572	100	0	WBGene00017101|E02H9.3	27.152	0.001	WBGene00022536|ZC178.2	96.186	0	Cnig_chr_IV.g12516	19.553	1.06e-08	357 aa	357			SEG: 0.36 (127/357)
chrV_pilon.g15057	All_exons		WBGene00022536|ZC178.2	V:8699806-8701722	96.194	0	chrV_pilon:8770639-8772552	100	0	WBGene00017101|E02H9.3	25.301	0.007	WBGene00022536|ZC178.2	96.148	0	Cnig_chr_IV.g12516	17.391	2.36e-19	637 aa	637			SEG: 0.45 (285/637)
chrV_pilon.g15058	All_exons		WBGene00022536|ZC178.2	V:8699350-8702961	95.19	0	chrV_pilon:8772979-8778449	94.391	0	WBGene00017101|E02H9.3	27.333	0.000735	WBGene00022536|ZC178.2	95.485	0	Cnig_chr_IV.g12516	18.054	3.93e-37	1855-1858 aa	1858			SEG: 0.35 (650/1858)
chrV_pilon.g15059	1+_nt		WBGene00022536|ZC178.2	V:8699350-8703060	97.252	0	chrV_pilon:8778699-8783147	100	0	WBGene00017101|E02H9.3	27.333	0.001	WBGene00022536|ZC178.2	97.528	0	Cnig_chr_IV.g12516	18.396	2.55e-37	1482 aa	1482			SEG: 0.47 (703/1482)
chrV_pilon.g15061	1+_nt			V:8713999-8715046	96.66	0	chrV_pilon:8793878-8799112	100	0							Cnig_chr_V.g16771	38.646	1.68e-88	1744 aa	1744
chrV_pilon.g15227	1+_nt			V:9339285-9339018	95.556	3.38e-120	chrV_pilon:9382925-9382656	100	9.31e-141										89 aa	89			SEG: 0.15 (13/89)
chrV_pilon.g15228	1+_nt			V:9340346-9339529	90.965	0	chrV_pilon:9383978-9383169	100	0										269 aa	269			SEG: 0.04 (12/269)
chrV_pilon.g15229	All_exons			V:9340373-9339657	92.963	0	chrV_pilon:9385000-9384283	93.099	0										245 aa	245			SEG: 0.11 (27/245)
chrV_pilon.g15288	1+_nt			V:9602245-9601846	98.5	0	chrV_pilon:9642883-9642482	100	0	WBGene00020795|T25D1.3	86.111	3.48e-24	WBGene00020795|T25D1.3	93.427	3.72e-86	Cni-Y69H2.10	41.429	0.096	133 aa	133			SEG: 0.86 (114/133)	GLTT [PF01744.19]
chrV_pilon.g15569	1+_nt			V:10605599-10609556	97.271	0	chrV_pilon:10654943-10658899	100	0										1318 aa	1318				UPF0029 [PF01205.18]
chrV_pilon.g15570	1+_exons			V:10606072-10610571	95.978	0	chrV_pilon:10659465-10663949	96.999	0										911-1489 aa	1489				UPF0029 [PF01205.18]
chrV_pilon.g15571	1+_exons			V:10606029-10610116	95.745	0	chrV_pilon:10670897-10674980	99.168	0										956-1355 aa	1355
chrV_pilon.g15618	All_exons			I:232195-231919	98.556	3.89e-137	chrV_pilon:10931274-10931557	100	3.02e-148	WBGene00021671|Y48G1BM.6	87.143	1.25e-37	WBGene00021671|Y48G1BM.6	98.208	3.41e-137				168 aa	168
chrV_pilon.g15619	All_exons			I:230083-229060	97.363	0	chrV_pilon:10932253-10933305	100	0							Cnig_chr_V.g22093	37.255	2.39e-06	350 aa	350			SEG: 0.04 (15/350)
chrV_pilon.g15620	1+_nt			IV:6006288-6005785	96.627	0	chrV_pilon:10933502-10934449	100	0	WBGene00012641|Y39A1A.1|epg-6	22.93	0.074				Cnig_chr_IV.g12772	36.126	2.16e-31	315 aa	315
chrV_pilon.g16032	All_exons			IV:11071557-11072301	96.252	0	chrV_pilon:12596265-12595523	100	0										249 aa	249			SEG: 0.97 (241/249)	Med31 [PF05669.11]
chrV_pilon.g16225	1+_exons			V:13362853-13363071	96.804	2.48e-99	chrV_pilon:13454207-13454425	96.804	2.52e-99	WBGene00009350|F32H5.4	100	3.56e-120	WBGene00009350|F32H5.4	100	0	Cni-F32H5.4	84.615	4.23e-104	148-169 aa	169	TM(2x)
chrV_pilon.g16392	1+_exons	WBGene00045401|T26F2.3|eol-1		V:13980375-13980043	100	5.97e-175	chrV_pilon:14079516-14079184	100	6.07e-175	WBGene00045401|T26F2.3|eol-1	100	0	WBGene00045401|T26F2.3|eol-1	100	0	Cnig_chr_V.g16435	46.226	3.63e-92	466-568 aa	568			SEG: 0.03 (16/568)	RAI1 [PF08652.10]
chrV_pilon.g16393	1+_nt			V:13982424-13982228	100	1.11e-99	chrV_pilon:14083475-14083251	100	3.08e-115	WBGene00045401|T26F2.3|eol-1	48.889	4.53e-94				Cnig_chr_V.g16435	41.009	7.36e-76	84-269 aa	269				RAI1 [PF08652.10]
chrV_pilon.g16435	1+_nt	WBGene00008396|D1086.9		V:14104270-14105954	93.934	0	chrV_pilon:14205958-14208132	100	0	WBGene00008396|D1086.9	85.973	0	WBGene00008396|D1086.9	93.934	0	Cnig_chr_V.g17010	46.23	1.25e-107	724 aa	724	SigP
chrV_pilon.g16436	1+_nt			V:14107811-14109909	96.475	0	chrV_pilon:14209613-14211733	100	0	WBGene00044201|H39E23.3	91.823	0	WBGene00044201|H39E23.3	96.475	0	Cnig_chr_V.g17010	44.223	7.34e-88	706 aa	706	SigP		SEG: 0.02 (13/706)
chrV_pilon.g16606	1+_nt			V:14744919-14741577	99.701	0	chrV_pilon:14851182-14847178	100	0				WBGene00001734|ZK643.8|grl-25	86.42	1.21e-15				1353 aa	1353	SigP		SEG: 0.98 (1325/1353)
chrV_pilon.g16635	All_exons			V:14885027-14884764	100	2.78e-137	chrV_pilon:14998993-14998730	100	2.83e-137	WBGene00044274|H12D21.15|nspa-7	100	3.53e-17	WBGene00044274|H12D21.15|nspa-7	100	1.66e-49	Cnig_chr_V.g17024	40.816	1.06e-11	122 aa	122	TM(1x)
chrV_pilon.g16636	All_exons			V:14879780-14879529	100	8.59e-131	chrV_pilon:14993746-14993495	100	8.74e-131	WBGene00013889|ZC412.8	100	5.46e-51	WBGene00013889|ZC412.8	100	2.11e-131				83 aa	83	SigP		SEG: 0.65 (54/83)
chrV_pilon.g16637	All_exons			V:14881757-14881594	100	1.08e-81	chrV_pilon:14995723-14995560	100	1.1e-81	WBGene00013890|ZC412.9	98.734	1.33e-54	WBGene00013890|ZC412.9	99.578	3.23e-121	Cnig_chr_V.g17024	79.412	3.35e-12	106-122 aa	122	TM(1x)
chrV_pilon.g16781	1+_nt			II:699095-698001	92.609	0	chrV_pilon:15445982-15447121	100	0	WBGene00020795|T25D1.3	77.778	1.21e-18	WBGene00021821|Y54B9A.1	92.549	3.85e-100				379 aa	379	TM(10x)		SEG: 0.91 (346/379)	GLTT [PF01744.19]
chrV_pilon.g16817	1+_exons			V:15432170-15432003	100	2.01e-83	chrV_pilon:15556945-15556778	100	2.05e-83	WBGene00012070|T26H5.8	100	0	WBGene00012070|T26H5.8	100	0	Cnig_chr_I.g3581	59.722	6.12e-161	365 aa	365				Glyco_transf_11 [PF01531.15]
chrV_pilon.g17313	1+_exons			V:16941334-16941624	100	6.77e-152	chrV_pilon:17104231-17104521	100	6.89e-152	WBGene00022890|ZK1290.9|fbxa-224	45.985	1.18e-67				nigoni.pc_2016.07.11_007.g26947	33.471	1.19e-31	178-293 aa	293			SEG: 0.04 (13/293)	F-box [PF00646.32]; FTH [PF01827.26]
chrV_pilon.g17598	1+_exons	WBGene00013344|Y59A8B.7|ebp-1		V:18049496-18049882	100	0	chrV_pilon:18268018-18268404	100	0	WBGene00013344|Y59A8B.7|ebp-1	100	0	WBGene00013344|Y59A8B.7|ebp-1	100	0	Cni-ebp-1	87.179	0	316 aa	316		NCoils: 0.09 (28/316)	SEG: 0.24 (75/316)	CH [PF00307.30]; EB1 [PF03271.16]
chrV_pilon.g17599	All_exons		WBGene00013344|Y59A8B.7|ebp-1	V:18055484-18055286	100	5.49e-101	chrV_pilon:18274006-18273808	100	5.59e-101	WBGene00013345|Y59A8B.8	100	1.3e-118	WBGene00013345|Y59A8B.8	100	0	Cnig_chr_V.g21961	77.778	1.22e-77	145-174 aa	174			SEG: 0.08 (14/174)
chrV_pilon.g17600	All_exons	WBGene00013344|Y59A8B.7|ebp-1		V:18049496-18049882	100	0	chrV_pilon:18268018-18268404	100	0	WBGene00013344|Y59A8B.7|ebp-1	100	2.18e-132	WBGene00013344|Y59A8B.7|ebp-1	100	0	Cni-ebp-1	80.328	1.85e-83	187 aa	187		NCoils: 0.15 (28/187)	SEG: 0.40 (75/187)	EB1 [PF03271.16]
chrV_pilon.g17601	All_exons		WBGene00013344|Y59A8B.7|ebp-1	V:18055484-18055286	100	5.49e-101	chrV_pilon:18274006-18273808	100	5.59e-101	WBGene00013345|Y59A8B.8	100	1.3e-118	WBGene00013345|Y59A8B.8	100	0	Cnig_chr_V.g21961	77.778	1.22e-77	145-174 aa	174			SEG: 0.08 (14/174)
chrV_pilon.g17602	1+_exons	WBGene00013344|Y59A8B.7|ebp-1		V:18049496-18049882	100	0	chrV_pilon:18268018-18268404	100	0	WBGene00013344|Y59A8B.7|ebp-1	100	2.18e-132	WBGene00013344|Y59A8B.7|ebp-1	100	0	Cni-ebp-1	80.328	1.85e-83	148-187 aa	187		NCoils: 0.15 (28/187)	SEG: 0.40 (75/187)	EB1 [PF03271.16]
chrV_pilon.g17743	1+_exons	WBGene00013484|Y69H2.9		V:18704382-18704626	100	2.9e-126	chrV_pilon:18964328-18964572	100	2.95e-126	WBGene00013484|Y69H2.9	100	0	WBGene00013484|Y69H2.9	100	0	Cnig_chr_V.g19561	27.322	8.87e-11	78-336 aa	336	SigP
chrV_pilon.g17744	1+_exons	WBGene00013484|Y69H2.9		V:18711393-18711644	100	9.84e-131	chrV_pilon:18971339-18971590	100	1e-130	WBGene00194680|Y17D7C.6	100	2.64e-66	WBGene00194680|Y17D7C.6	100	1.09e-149				94 aa	94
chrV_pilon.g17892	All_exons			V:19429987-19429694	99.66	1.7e-151	chrV_pilon:19723776-19723483	99.66	1.73e-151	WBGene00005832|C25F9.1|srw-85	99.5	1.09e-147	WBGene00005832|C25F9.1|srw-85	99.669	0	nigoni.pc_2016.07.11_026.g28562	41.011	2.29e-34	207 aa	207
chrV_pilon.g17926	1+_exons	WBGene00012826|Y43F8C.4|dyf-19		V:19627339-19627683	99.71	5.56e-180	chrV_pilon:19924901-19925245	99.71	5.66e-180	WBGene00012826|Y43F8C.4|dyf-19	100	0	WBGene00012826|Y43F8C.4|dyf-19	100	0	Cni-dyf-19	68.488	0	534 aa	534		NCoils: 0.22 (120/534)	SEG: 0.25 (131/534)
chrV_pilon.g17927	All_exons		WBGene00012826|Y43F8C.4|dyf-19	V:19632005-19631724	100	5.67e-147	chrV_pilon:19929567-19929286	100	5.77e-147	WBGene00012827|Y43F8C.5	100	0	WBGene00012827|Y43F8C.5	100	0	Cnig_chr_V.g21487	30.303	6.14e-06	245 aa	245	SigP+TM(1x)		SEG: 0.13 (33/245)
chrV_pilon.g17928	All_exons		WBGene00012826|Y43F8C.4|dyf-19	V:19635398-19635080	100	1.8e-167	chrV_pilon:19932960-19932642	100	1.84e-167	WBGene00012828|Y43F8C.6	100	0	WBGene00012828|Y43F8C.6	100	0	Cni-Y43F8C.6	52.303	1.03e-80	96-287 aa	287			SEG: 0.33 (95/287)
chrX_pilon.g18196	All_exons			X:9289-8904	99.223	0	chrX_pilon:11671-11286	99.223	0	WBGene00018778|F53H1.4	69.307	6.36e-114	WBGene00018778|F53H1.4	93.153	0	Cni-F53H1.4	55.351	2.22e-79	222-248 aa	248	SigP	NCoils: 0.08 (21/248)	SEG: 0.10 (24/248)	SNF [PF00209.17]
chrX_pilon.g18197	1+_exons			X:3429-4103	100	0	chrX_pilon:29608-28934	100	0	WBGene00021423|Y38F2AR.5|tftc-1	67.417	0	WBGene00021423|Y38F2AR.5|tftc-1	92.006	0	Cni-tftc-1	44.894	3.6e-119	277-685 aa	685			SEG: 0.03 (23/685)
chrX_pilon.g18353	1+_nt			II:698898-694517	90.176	0	chrX_pilon:983900-988330	100	0	WBGene00020795|T25D1.3	61.702	1.89e-18	WBGene00021821|Y54B9A.1	94.762	1.99e-88	Cnig_chr_X.g22466	26.527	2.81e-20	1476 aa	1476	TM(40x)		SEG: 0.98 (1453/1476)	GLTT [PF01744.19]
chrX_pilon.g18431	1+_exons	WBGene00022728|ZK402.1		X:1405785-1406217	98.856	0	chrX_pilon:1451138-1451574	99.771	0	WBGene00022731|ZK402.5	100	0	WBGene00022731|ZK402.5	99.767	0	nigoni.pc_2016.07.11_017.g28130	24.828	4.97e-08	425-473 aa	473	TM(1x)		SEG: 0.07 (35/473)	SPK [PF04435.17]
chrX_pilon.g18475	1+_nt			III:7453355-7452517	89.549	0	chrX_pilon:1701953-1701096	100	0	WBGene00006820|C09D1.1|unc-89	15.041	0.014				Cni-mth-1	34.507	7.51e-15	285 aa	285
chrX_pilon.g18476	All_exons			III:7453267-7452538	89.344	0	chrX_pilon:1703126-1702386	100	0							Cni-mth-1	34.228	1.37e-14	246 aa	246
chrX_pilon.g18477	1+_nt			III:7453311-7452516	89.513	0	chrX_pilon:1704368-1703559	100	0	WBGene00006820|C09D1.1|unc-89	17.442	0.007				Cni-mth-1	33.333	2.96e-13	269 aa	269
chrX_pilon.g18478	1+_nt			III:7453208-7452594	88.961	0	chrX_pilon:1706364-1705681	100	0	WBGene00000397|F08B4.2|cdh-5	24.37	0.024				Cni-mth-1	33.333	5.6e-16	227 aa	227
chrX_pilon.g18513	1+_nt	WBGene00020828|T26C11.2	WBGene00020829|T26C11.3	X:1836310-1837368	97.642	0	chrX_pilon:1911476-1912813	100	0	WBGene00020828|T26C11.2	96.83	3.87e-175	WBGene00020828|T26C11.2	99.696	0	Cni-C50F7.5	31.868	3.65e-12	445 aa	445	SigP		SEG: 0.91 (407/445)
chrX_pilon.g18531	All_exons			X:1947202-1946611	100	0	chrX_pilon:2022555-2021964	100	0	WBGene00044659|F44G3.12|fbxa-142	30.12	2.37e-08				Cnig_chr_V.g16808	46.418	2.57e-98	297 aa	297			SEG: 0.04 (12/297)
chrX_pilon.g18532	All_exons			X:1948467-1948673	99.517	1.04e-103	chrX_pilon:2023820-2024026	99.517	1.06e-103	WBGene00018691|F52D2.10|fbxa-17	100	2.71e-145	WBGene00018691|F52D2.10|fbxa-17	100	0	nigoni.pc_2016.07.11_007.g26896	25.806	6.13e-05	198 aa	198			SEG: 0.08 (15/198)	F-box [PF00646.32]; FTH [PF01827.26]
chrX_pilon.g18533	All_exons			X:1945031-1944832	100	2.03e-101	chrX_pilon:2020181-2019982	100	2.06e-101	WBGene00021988|Y59E1A.2|rgs-8.2	100	1.05e-176	WBGene00021988|Y59E1A.2|rgs-8.2	100	0	Cnig_chr_X.g23899	28.966	4.9e-10	227-229 aa	229			SEG: 0.07 (17/229)	RGS [PF00615.18]
chrX_pilon.g18545	1+_exons			II:698495-697374	87.026	0	chrX_pilon:2089247-2089978	98.497	0	WBGene00007258|C01H6.9|hasp-1	38.989	8.01e-50	WBGene00021821|Y54B9A.1	94.492	6.56e-100	Cnig_chr_IV.g14463	32.971	6.37e-38	249-641 aa	641	TM(10x)		SEG: 0.43 (277/641)	GLTT [PF01744.19]; Haspin_kinase [PF12330.7]
chrX_pilon.g18785	1+_exons	WBGene00015952|C18B2.1; WBGene00015953|C18B2.2		X:3631393-3631915	93.881	0	chrX_pilon:3749110-3751745	96.57	0	WBGene00015952|C18B2.1	100	0	WBGene00015952|C18B2.1	100	0	Cni-C18B2.1	71.795	3.99e-153	1190-1201 aa	1201	TM(1x)		SEG: 0.01 (17/1201)	Sulfotransfer_2 [PF03567.13]
chrX_pilon.g18808	1+_exons			X:3753609-3751341	100	0	chrX_pilon:3874107-3871839	100	0	WBGene00017524|F16G10.9	72.028	1.76e-58	WBGene00235110|T14G12.12	82.91	4.48e-103	nigoni.pc_2016.07.11_019.g28239	34.146	5.65e-52	922-944 aa	944	SigP	NCoils: 0.02 (21/944)	SEG: 0.03 (31/944)	DUF1759 [PF03564.14]; TRA-1_regulated [PF02343.15]
chrX_pilon.g18809	1+_exons			X:3755602-3755399	100	1.12e-103	chrX_pilon:3876100-3875897	100	1.14e-103	WBGene00235110|T14G12.12	87.264	1.76e-129	WBGene00235110|T14G12.12	92.212	0	Cnig_chr_II.g7438	28.986	2.69e-07	190-212 aa	212	SigP		SEG: 0.10 (22/212)	TRA-1_regulated [PF02343.15]
chrX_pilon.g19893	1+_nt			X:10369204-10370357	94.801	0	chrX_pilon:10641219-10642373	100	0							Cni-clec-217	37.394	1.31e-10	384 aa	384				Melittin [PF01372.16]
chrX_pilon.g20049	All_exons			X:5756804-5756875	98.611	8.5e-29	chrX_pilon:11589148-11588990	100	8.06e-79				WBGene00021806|Y53G8AM.6	98.551	9.64e-28				147 aa	147
chrX_pilon.g20218	1+_exons			I:10951963-10946153	82.688	0	chrX_pilon:12595818-12601636	91.437	0	WBGene00284854|Y95D11A.5	82.609	0.004	WBGene00284854|Y95D11A.5	90.244	1.34e-21				1125-1949 aa	1949	TM(66x)
chrX_pilon.g20709	1+_nt		WBGene00006747|R07D5.1|unc-7	X:15131723-15131970	99.598	6.6e-127	chrX_pilon:15493269-15493517	100	4.01e-129										82 aa	82
chrX_pilon.g20793	1+_exons	WBGene00014070|ZK678.4|srxa-9	WBGene00014069|ZK678.3	X:15751560-15751851	99.658	9.68e-151	chrX_pilon:16122336-16122627	99.658	9.85e-151	WBGene00014070|ZK678.4|srxa-9	100	0	WBGene00014070|ZK678.4|srxa-9	100	0	Cnig_chr_X.g25736	45.763	9.21e-90	137-323 aa	323	TM(6x)		SEG: 0.04 (12/323)	Serpentine_r_xa [PF03383.14]
chrX_pilon.g21036	1+_exons			X:17447799-17441742	94.509	0	chrX_pilon:17829839-17820614	95.601	0	WBGene00000083|F08C6.1|adt-2	22.581	0.003				Cnig_chr_V.g16771	34.697	8.16e-10	1446-3083 aa	3083	TM(1x)		SEG: 0.57 (1743/3083)
chrX_pilon.g21037	1+_exons			X:17447853-17441730	94.329	0	chrX_pilon:17836740-17830258	97.628	0							Cnig_chr_V.g19794	23.525	1.64e-44	2179-2186 aa	2186			SEG: 0.76 (1652/2186)
