# Supplementary material for: Recompleting the Caenorhabditis elegans genome
Source: HighWire-hosted journal article supplement (doi:10.1101/gr.244830.118), 2019-05-23
Supplement: Supplemental_Table_S22.xlsx [file Supplemental_Table_S22.xlsx]

## Sheet: VC2010_Supp_Table_22
Gene	VC2010-spec.	N2_same.strand	N2_opposite.strand	N2_genDNA	N2_perc_id	N2_E-value	VC2010_genDNA	VC_perc_id	VC_E-value	Cel_prot	Cel_perc_id	Cel_E-value	Cel_CDS_DNA	Cel.CDS_perc_id	Cel.CDS_E-value	Cni_prot	Cni_perc_id	Cni_E-value	Prot_size	Max_prot_size	Phobius	NCoils	Psegs	PFAM
chrI_pilon.g2005	1+_exons	WBGene00013859|ZC247.1		I:10268720-10265201	98.58	0	chrI_pilon:10436876-10433340	100	0	WBGene00013859|ZC247.1	84.011	0	WBGene00013859|ZC247.1	98.731	0	Cni-ZC247.1	71.264	0	4149-4174 aa	4174			SEG: 0.01 (32/4174)	PqqA [PF08042.10]
chrI_pilon.g2006	1+_exons	WBGene00013859|ZC247.1		I:10277249-10266279	88.501	0	chrI_pilon:10461511-10449084	100	0	WBGene00013859|ZC247.1	88.943	0	WBGene00013859|ZC247.1	87.746	0	Cni-ZC247.1	80.239	0	4980-4994 aa	4994			SEG: 0.01 (63/4994)	HTH_psq [PF05225.15]
chrII_pilon.g4827	1+_exons	WBGene00020576|T19D12.1		II:6671596-6672675	100	0	chrII_pilon:6787399-6788478	100	0	WBGene00020576|T19D12.1	95.662	0	WBGene00020576|T19D12.1	97.239	0	Cnig_chr_II.g5157	61.411	3.6e-80	1979-2038 aa	2038	TM(1x)		SEG: 0.42 (859/2038)
chrII_pilon.g5021	1+_exons	WBGene00021187|Y9D1A.2		II:7446999-7447437	99.772	0	chrII_pilon:7569465-7569030	100	0	WBGene00021186|Y9D1A.1	69.703	0	WBGene00021186|Y9D1A.1	95.312	0				488-507 aa	507			SEG: 0.09 (47/507)
chrII_pilon.g6216	1+_exons	WBGene00012585|Y38E10A.7|lips-15		II:12606212-12606685	97.89	0	chrII_pilon:12747501-12747974	100	0	WBGene00012585|Y38E10A.7|lips-15	94.755	0	WBGene00012585|Y38E10A.7|lips-15	97.038	0	Cnig_chr_II.g7582	57.192	3.12e-109	288 aa	288	SigP		SEG: 0.06 (17/288)	DUF676 [PF05057.13]; Lipase_2 [PF01674.17]
chrII_pilon.g6217	1+_exons	WBGene00012585|Y38E10A.7|lips-15		II:12606212-12606685	98.312	0	chrII_pilon:12748870-12749346	99.79	0	WBGene00012585|Y38E10A.7|lips-15	96.853	0	WBGene00012585|Y38E10A.7|lips-15	98.258	0	Cnig_chr_II.g7582	56.507	5.28e-110	286 aa	286	SigP		SEG: 0.06 (17/286)	DUF676 [PF05057.13]; Hydrolase_4 [PF12146.7]; Lipase_2 [PF01674.17]
chrIII_pilon.g7336	1+_nt	WBGene00006575|F13B10.1|tir-1		V:15321536-15322346	93.842	0	chrIII_pilon:4031029-4030220	100	0	WBGene00020795|T25D1.3	71.233	1.38e-15	WBGene00021821|Y54B9A.1	93.701	2.7e-105	Cnig_chr_V.g17351	50.515	2.5e-05	269 aa	269			SEG: 0.94 (252/269)	GLTT [PF01744.19]; Pentapeptide_4 [PF13599.5]
chrIV_pilon.g10898	1+_nt	WBGene00016845|C50F7.5		IV:7726719-7727450	97.541	0	chrIV_pilon:7759055-7760290	100	0	WBGene00016845|C50F7.5	97.89	4.99e-88	WBGene00016845|C50F7.5	97.541	0	Cni-C50F7.5	41.83	4.38e-37	411 aa	411	SigP		SEG: 0.72 (297/411)
chrIV_pilon.g11307	1+_nt	WBGene00010150|F56D5.6		V:15321447-15322339	92.729	0	chrIV_pilon:9469786-9470725	100	0	WBGene00010150|F56D5.6	97.778	1.63e-25	WBGene00021821|Y54B9A.1	92.713	2.17e-97	Cnig_chr_IV.g13142	70	9.75e-15	356 aa	356	TM(9x)		SEG: 0.84 (300/356)	GLTT [PF01744.19]
chrV_pilon.g14390	All_exons	WBGene00006436|W06H8.8|ttn-1		V:6174231-6171682	92.728	0	chrV_pilon:6169184-6166566	100	0	WBGene00006436|W06H8.8|ttn-1	71.783	0	WBGene00006436|W06H8.8|ttn-1	92.172	0	Cnig_chr_III.g11421	20.833	9.18e-17	872 aa	872		NCoils: 0.68 (594/872)	SEG: 0.92 (800/872)
chrV_pilon.g14417	1+_exons	WBGene00020889|T28C12.2		V:6330438-6330791	100	0	chrV_pilon:6345323-6345676	100	0	WBGene00020889|T28C12.2	87.957	0	WBGene00020888|T28C12.1	88.206	0	Cnig_chr_V.g19824	78.495	0	432-473 aa	473	TM(12x)		SEG: 0.03 (13/473)	MFS_1 [PF07690.15]
chrV_pilon.g14910	1+_exons	WBGene00017020|D1014.7		V:8120103-8120351	100	2.6e-128	chrV_pilon:8176899-8177150	100	5.69e-130	WBGene00017019|D1014.6	88.05	0	WBGene00017019|D1014.6	89.552	0	Cnig_chr_V.g16546	73.207	0	500 aa	500	SigP			Glyco_transf_92 [PF01697.26]
chrV_pilon.g16435	1+_nt	WBGene00008396|D1086.9		V:14104270-14105954	93.934	0	chrV_pilon:14205958-14208132	100	0	WBGene00008396|D1086.9	85.973	0	WBGene00008396|D1086.9	93.934	0	Cnig_chr_V.g17010	46.23	1.25e-107	724 aa	724	SigP
