# Supplementary material for: Recompleting the Caenorhabditis elegans genome
Source: HighWire-hosted journal article supplement (doi:10.1101/gr.244830.118), 2019-05-23
Supplement: Supplemental_Table_S23.xlsx [file Supplemental_Table_S23.xlsx]

## Sheet: VC2010_Supp_Table_23
Gene	VC2010-spec.	N2_same.strand	N2_opposite.strand	N2_genDNA	N2_perc_id	N2_E-value	VC2010_genDNA	VC_perc_id	VC_E-value	Cel_prot	Cel_perc_id	Cel_E-value	Cel_CDS_DNA	Cel.CDS_perc_id	Cel.CDS_E-value	Cni_prot	Cni_perc_id	Cni_E-value	Prot_size	Max_prot_size	Phobius	NCoils	Psegs	PFAM
chrI_pilon.g38	1+_nt			I:221448-220951	99.8	0	chrI_pilon:223281-222783	100	0	WBGene00004242|F18A11.1|puf-6	89.773	3.65e-111	WBGene00004243|B0273.2|puf-7	93.951	0	Cnig_chr_III.g9749	46.988	2.23e-41	191 aa	191			SEG: 0.11 (21/191)	PUF [PF00806.18]
chrI_pilon.g1134	1+_nt		WBGene00000254|K04F10.4|bli-4	I:6352595-6350873	100	0	chrI_pilon:6490021-6488299	100	0							Cnig_chr_X.g22637	38.043	9.22e-13	716 aa	716		NCoils: 0.03 (21/716)	SEG: 0.06 (42/716)	Exo_endo_phos [PF03372.22]; Exo_endo_phos_2 [PF14529.5]; RVT_1 [PF00078.26]
chrI_pilon.g1590	All_exons						chrI_pilon:8607308-8607573	100	3.69e-138	WBGene00017785|F25E5.4	27.119	0.003				Cnig_chr_I.g2367	40	8.62e-14	90-201 aa	201	SigP			DUF316 [PF03761.14]
chrI_pilon.g3014	All_exons			I:15067840-15067463	100	0	chrI_pilon:15321153-15320776	100	0							nigoni.pc_2016.07.11_067.g29008	100	2.55e-92	125 aa	125
chrII_pilon.g3353	1+_nt			II:1448763-1449300	90.441	0	chrII_pilon:1456947-1457514	90.669	0	WBGene00044439|Y51H7C.15	48.227	4.63e-18	WBGene00021187|Y9D1A.2	83.682	2.63e-54	Cnig_chr_IV.g12516	31.522	2.02e-05	190-191 aa	191			SEG: 0.15 (28/191)
chrII_pilon.g4680	1+_nt			II:6081937-6082206	99.63	4.25e-139	chrII_pilon:6176535-6176804	100	9.31e-141							Cnig_chr_IV.g13563	30.508	0.044	89 aa	89
chrII_pilon.g4701	1+_nt			II:7446168-7446441	92.806	1.48e-110	chrII_pilon:6283733-6283381	100	0	WBGene00021187|Y9D1A.2	69.725	2e-30	WBGene00021187|Y9D1A.2	92.607	1.02e-101	Cnig_chr_IV.g12516	38.961	4.32e-08	134 aa	134
chrII_pilon.g4872	1+_nt			II:6819076-6818685	100	0	chrII_pilon:6934876-6934485	100	0	WBGene00010785|K12D12.1|top-2	63.818	2.78e-126	WBGene00010785|K12D12.1|top-2	88.472	8.04e-126	Cnig_chr_II.g6032	58.239	6.63e-114	131-296 aa	296				DNA_gyraseB [PF00204.24]; HATPase_c [PF02518.25]
chrII_pilon.g6413	All_exons						chrII_pilon:13908936-13908656	100	1.48e-146	WBGene00011826|T18D3.9	50.602	1.28e-61				Cnig_chr_II.g6634	77.273	1.96e-101	176 aa	176	SigP+TM(3x)			Mpv17_PMP22 [PF04117.11]
chrIII_pilon.g7971	1+_nt			X:53879-54376	99.8	0	chrIII_pilon:6758392-6758890	100	0	WBGene00013610|Y102A5C.1|fbxa-206	30.526	6.14e-07				Cnig_chr_II.g7346	43.438	7.84e-86	285-310 aa	310			SEG: 0.04 (13/310)	Transposase_1 [PF01359.17]
chrIII_pilon.g8049	1+_nt		WBGene00004182|C06E8.3|prk-1	III:7000250-6998126	100	0	chrIII_pilon:7182307-7180183	100	0	WBGene00007406|C07A9.10	76.471	2.56e-18				Cnig_chr_IV.g15661	34.677	5.13e-87	1048-1051 aa	1051			SEG: 0.01 (8/1051)	Exo_endo_phos [PF03372.22]; RVT_1 [PF00078.26]
chrIII_pilon.g8160	1+_nt			III:7453256-7452621	90.723	0	chrIII_pilon:7684107-7683473	100	0							Cni-mth-1	34.266	1.42e-09	231 aa	231
chrIII_pilon.g8194	1+_nt			V:11108609-11108073	86.431	1.79e-156	chrV_pilon:11176740-11176204	86.431	1.82e-156										139-219 aa	219
chrIII_pilon.g8490	1+_nt			III:8853817-8860625	100	0	chrIII_pilon:9124674-9139996	99.505	0	WBGene00018838|F54G2.2	32.734	2.75e-104				nigoni.pc_2016.07.11_033.g28757	49.507	0	1833-7454 aa	7454		NCoils: 0.01 (103/7454)	SEG: 0.39 (2891/7454)	RVT_1 [PF00078.26]; rve [PF00665.25]
chrIII_pilon.g8885	1+_nt		WBGene00009654|F43D9.3|sly-1	III:10515273-10514900	99.733	0	chrIII_pilon:10812639-10812265	100	0										124 aa	124	SigP		SEG: 0.10 (12/124)
chrIV_pilon.g9550	1+_nt			IV:698404-688738	97.581	0	chrIV_pilon:705289-695127	100	0	WBGene00010357|H03A11.2	27.762	9e-50				Cnig_chr_IV.g15239	73.757	0	2015-3456 aa	3456
chrIV_pilon.g11723	1+_exons			II:13598680-13599926	92.061	0	chrIV_pilon:11031352-11016020	96.124	0							Cnig_chr_V.g17598	30.986	0.000138	5075-5117 aa	5117			SEG: 0.02 (77/5117)	CobW_C [PF07683.13]; Spore_GerAC [PF05504.10]
chrIV_pilon.g11724	1+_nt			II:13598680-13599934	90.294	0	chrIV_pilon:11032934-11034516	99.937	0							Cnig_chr_V.g17173	33.981	2.23e-06	536-562 aa	562				GBP_repeat [PF02526.13]; INCENP_ARK-bind [PF03941.14]; PAS [PF00989.24]; Spore_GerAC [PF05504.10]
chrIV_pilon.g11757	All_exons			IV:11074026-11074609	98.459	0	chrIV_pilon:11182551-11183144	100	0										197 aa	197				EPTP [PF03736.16]; Pantoate_transf [PF02548.14]
chrIV_pilon.g11758	1+_exons			V:10605697-10612492	90.818	0	chrIV_pilon:11184993-11196215	97.2	0							nigoni.pc_2016.07.11_007.g27051	32.927	0.01	3507-3694 aa	3694
chrIV_pilon.g11889	1+_nt			IV:11616988-11616666	96.904	4.28e-152	chrIV_pilon:11733740-11734306	100	0	WBGene00021187|Y9D1A.2	67.89	2.8e-30	WBGene00021187|Y9D1A.2	88.627	2.48e-84	Cnig_chr_IV.g12516	37.209	2.37e-19	188 aa	188			SEG: 0.19 (36/188)
chrIV_pilon.g11890	1+_nt			IV:11616988-11616666	97.833	3.13e-158	chrIV_pilon:11744333-11743794	100	0	WBGene00021187|Y9D1A.2	66.964	6.78e-31	WBGene00021187|Y9D1A.2	86.786	8.47e-84	Cnig_chr_IV.g12516	36.975	6.33e-17	179 aa	179			SEG: 0.21 (37/179)
chrIV_pilon.g12368	1+_nt			IV:13734254-13735527	99.529	0	chrIV_pilon:13917740-13919013	100	0										1040-1072 aa	1072				Statherin [PF03875.12]
chrIV_pilon.g12449	1+_nt			I:3392838-3390527	91.393	0	chrIV_pilon:14419595-14417237	100	0	WBGene00021821|Y54B9A.1	87.143	1.86e-24	WBGene00020795|T25D1.3	93.023	8.31e-85	Cnig_chr_X.g23097	39.13	1.83e-12	793-794 aa	794				GETHR [PF05671.10]
chrIV_pilon.g12644	1+_nt			IV:15597528-15598692	99.914	0	chrIV_pilon:15831115-15832280	100	0	WBGene00017026|D1037.5|ipla-4	22.477	0.033				Cnig_chr_II.g7879	26.38	7.83e-07	585-588 aa	588		NCoils: 0.04 (21/588)	SEG: 0.01 (8/588)	Exo_endo_phos [PF03372.22]; Exo_endo_phos_2 [PF14529.5]
chrV_pilon.g13510	All_exons			V:2628648-2629054	99.509	0	chrV_pilon:2570456-2570862	99.509	0	WBGene00021679|Y48G1C.6	53.774	7.43e-31				Cnig_chr_V.g18107	48.515	3.65e-23	334-366 aa	366			SEG: 0.03 (11/366)	BrkDBD [PF09607.9]; DDE_1 [PF03184.18]; HTH_Tnp_Tc5 [PF03221.15]
chrV_pilon.g13551	1+_nt			V:2777419-2777759	97.947	1.9e-168	chrV_pilon:2726802-2727143	100	1.14e-180	WBGene00005606|R05D8.2|srj-18	47.059	0.002				Cnig_chr_V.g18183	36.735	0.012	113 aa	113
chrV_pilon.g13552	1+_nt			V:2777419-2777789	97.305	4.4e-180	chrV_pilon:2727828-2728199	100	0	WBGene00005606|R05D8.2|srj-18	47.059	0.002							123 aa	123
chrV_pilon.g14374	All_exons						chrV_pilon:6080422-6079856	100	0										188 aa	188			SEG: 0.06 (12/188)
chrV_pilon.g14894	1+_nt			V:8063888-8063247	96.979	0	chrV_pilon:8118600-8117939	100	0	WBGene00007392|C06H5.1|fbxa-156	42.951	6.06e-66				Cnig_chr_V.g21135	22.878	1.6e-09	325-354 aa	354	SigP		SEG: 0.08 (28/354)	FTH [PF01827.26]
chrV_pilon.g15061	1+_nt			V:8713999-8715046	96.66	0	chrV_pilon:8793878-8799112	100	0							Cnig_chr_V.g16771	38.646	1.68e-88	1744 aa	1744
chrV_pilon.g15227	1+_nt			V:9339285-9339018	95.556	3.38e-120	chrV_pilon:9382925-9382656	100	9.31e-141										89 aa	89			SEG: 0.15 (13/89)
chrV_pilon.g15228	1+_nt			V:9340346-9339529	90.965	0	chrV_pilon:9383978-9383169	100	0										269 aa	269			SEG: 0.04 (12/269)
chrV_pilon.g15229	All_exons			V:9340373-9339657	92.963	0	chrV_pilon:9385000-9384283	93.099	0										245 aa	245			SEG: 0.11 (27/245)
chrV_pilon.g15569	1+_nt			V:10605599-10609556	97.271	0	chrV_pilon:10654943-10658899	100	0										1318 aa	1318				UPF0029 [PF01205.18]
chrV_pilon.g15570	1+_exons			V:10606072-10610571	95.978	0	chrV_pilon:10659465-10663949	96.999	0										911-1489 aa	1489				UPF0029 [PF01205.18]
chrV_pilon.g15571	1+_exons			V:10606029-10610116	95.745	0	chrV_pilon:10670897-10674980	99.168	0										956-1355 aa	1355
chrV_pilon.g15619	All_exons			I:230083-229060	97.363	0	chrV_pilon:10932253-10933305	100	0							Cnig_chr_V.g22093	37.255	2.39e-06	350 aa	350			SEG: 0.04 (15/350)
chrV_pilon.g15620	1+_nt			IV:6006288-6005785	96.627	0	chrV_pilon:10933502-10934449	100	0	WBGene00012641|Y39A1A.1|epg-6	22.93	0.074				Cnig_chr_IV.g12772	36.126	2.16e-31	315 aa	315
chrV_pilon.g16393	1+_nt			V:13982424-13982228	100	1.11e-99	chrV_pilon:14083475-14083251	100	3.08e-115	WBGene00045401|T26F2.3|eol-1	48.889	4.53e-94				Cnig_chr_V.g16435	41.009	7.36e-76	84-269 aa	269				RAI1 [PF08652.10]
chrV_pilon.g17313	1+_exons			V:16941334-16941624	100	6.77e-152	chrV_pilon:17104231-17104521	100	6.89e-152	WBGene00022890|ZK1290.9|fbxa-224	45.985	1.18e-67				nigoni.pc_2016.07.11_007.g26947	33.471	1.19e-31	178-293 aa	293			SEG: 0.04 (13/293)	F-box [PF00646.32]; FTH [PF01827.26]
chrX_pilon.g18196	All_exons			X:9289-8904	99.223	0	chrX_pilon:11671-11286	99.223	0	WBGene00018778|F53H1.4	69.307	6.36e-114	WBGene00018778|F53H1.4	93.153	0	Cni-F53H1.4	55.351	2.22e-79	222-248 aa	248	SigP	NCoils: 0.08 (21/248)	SEG: 0.10 (24/248)	SNF [PF00209.17]
chrX_pilon.g18197	1+_exons			X:3429-4103	100	0	chrX_pilon:29608-28934	100	0	WBGene00021423|Y38F2AR.5|tftc-1	67.417	0	WBGene00021423|Y38F2AR.5|tftc-1	92.006	0	Cni-tftc-1	44.894	3.6e-119	277-685 aa	685			SEG: 0.03 (23/685)
chrX_pilon.g18475	1+_nt			III:7453355-7452517	89.549	0	chrX_pilon:1701953-1701096	100	0	WBGene00006820|C09D1.1|unc-89	15.041	0.014				Cni-mth-1	34.507	7.51e-15	285 aa	285
chrX_pilon.g18476	All_exons			III:7453267-7452538	89.344	0	chrX_pilon:1703126-1702386	100	0							Cni-mth-1	34.228	1.37e-14	246 aa	246
chrX_pilon.g18477	1+_nt			III:7453311-7452516	89.513	0	chrX_pilon:1704368-1703559	100	0	WBGene00006820|C09D1.1|unc-89	17.442	0.007				Cni-mth-1	33.333	2.96e-13	269 aa	269
chrX_pilon.g18478	1+_nt			III:7453208-7452594	88.961	0	chrX_pilon:1706364-1705681	100	0	WBGene00000397|F08B4.2|cdh-5	24.37	0.024				Cni-mth-1	33.333	5.6e-16	227 aa	227
chrX_pilon.g18531	All_exons			X:1947202-1946611	100	0	chrX_pilon:2022555-2021964	100	0	WBGene00044659|F44G3.12|fbxa-142	30.12	2.37e-08				Cnig_chr_V.g16808	46.418	2.57e-98	297 aa	297			SEG: 0.04 (12/297)
chrX_pilon.g18545	1+_exons			II:698495-697374	87.026	0	chrX_pilon:2089247-2089978	98.497	0	WBGene00007258|C01H6.9|hasp-1	38.989	8.01e-50	WBGene00021821|Y54B9A.1	94.492	6.56e-100	Cnig_chr_IV.g14463	32.971	6.37e-38	249-641 aa	641	TM(10x)		SEG: 0.43 (277/641)	GLTT [PF01744.19]; Haspin_kinase [PF12330.7]
chrX_pilon.g18808	1+_exons			X:3753609-3751341	100	0	chrX_pilon:3874107-3871839	100	0	WBGene00017524|F16G10.9	72.028	1.76e-58	WBGene00235110|T14G12.12	82.91	4.48e-103	nigoni.pc_2016.07.11_019.g28239	34.146	5.65e-52	922-944 aa	944	SigP	NCoils: 0.02 (21/944)	SEG: 0.03 (31/944)	DUF1759 [PF03564.14]; TRA-1_regulated [PF02343.15]
chrX_pilon.g18809	1+_exons			X:3755602-3755399	100	1.12e-103	chrX_pilon:3876100-3875897	100	1.14e-103	WBGene00235110|T14G12.12	87.264	1.76e-129	WBGene00235110|T14G12.12	92.212	0	Cnig_chr_II.g7438	28.986	2.69e-07	190-212 aa	212	SigP		SEG: 0.10 (22/212)	TRA-1_regulated [PF02343.15]
chrX_pilon.g19893	1+_nt			X:10369204-10370357	94.801	0	chrX_pilon:10641219-10642373	100	0							Cni-clec-217	37.394	1.31e-10	384 aa	384				Melittin [PF01372.16]
chrX_pilon.g20709	1+_nt		WBGene00006747|R07D5.1|unc-7	X:15131723-15131970	99.598	6.6e-127	chrX_pilon:15493269-15493517	100	4.01e-129										82 aa	82
