# Supplementary material for: Recompleting the Caenorhabditis elegans genome
Source: HighWire-hosted journal article supplement (doi:10.1101/gr.244830.118), 2019-05-23
Supplement: Supplemental_Table_S24.xlsx [file Supplemental_Table_S24.xlsx]

## Sheet: VC2010_Supp_Table_24
Chromosome	Start nt	End nt	Strand	RFAM motifs
chrI_pilon	15324811	15324961	+	Name=5_8S_rRNA_RF00002
chrI_pilon	15325236	15328857	+	Name=LSU_rRNA_archaea_RF02540|Name=LSU_rRNA_bacteria_RF02541|Name=LSU_rRNA_eukarya_RF02543
chrI_pilon	15329785	15331301	+	Name=SSU_rRNA_archaea_RF01959|Name=SSU_rRNA_bacteria_RF00177|Name=SSU_rRNA_eukarya_RF01960|Name=SSU_rRNA_microsporidia_RF02542
chrIV_pilon	11447763	11447809	-	Name=Histone3_RF00032
chrV_pilon	17285997	17286116	+	Name=5S_rRNA_RF00001
chrV_pilon	17286973	17287092	+	Name=5S_rRNA_RF00001
chrV_pilon	17287950	17288069	+	Name=5S_rRNA_RF00001
chrV_pilon	17288926	17289045	+	Name=5S_rRNA_RF00001
chrV_pilon	17289902	17290021	+	Name=5S_rRNA_RF00001
chrV_pilon	17290878	17290997	+	Name=5S_rRNA_RF00001
chrV_pilon	17291853	17291972	+	Name=5S_rRNA_RF00001
chrV_pilon	17293768	17293892	+	Name=5S_rRNA_RF00001
chrV_pilon	17295106	17295225	+	Name=5S_rRNA_RF00001
chrV_pilon	17299009	17299128	+	Name=5S_rRNA_RF00001
chrV_pilon	17299984	17300103	+	Name=5S_rRNA_RF00001
chrV_pilon	17300959	17301078	+	Name=5S_rRNA_RF00001
chrV_pilon	17301935	17302054	+	Name=5S_rRNA_RF00001
chrV_pilon	17302911	17303030	+	Name=5S_rRNA_RF00001
chrV_pilon	17303885	17304004	+	Name=5S_rRNA_RF00001
chrV_pilon	17304857	17304976	+	Name=5S_rRNA_RF00001
chrV_pilon	17305830	17305949	+	Name=5S_rRNA_RF00001
chrV_pilon	17306802	17306921	+	Name=5S_rRNA_RF00001
chrX_pilon	2630859	2630933	-	Name=tRNA_RF00005
chrX_pilon	9081210	9081282	+	Name=tRNA_RF00005
chrX_pilon	9081879	9081951	-	Name=tRNA_RF00005
chrX_pilon	9082094	9082166	+	Name=tRNA_RF00005
chrX_pilon	9082289	9082361	-	Name=tRNA_RF00005
chrX_pilon	13634040	13634112	+	Name=tRNA_RF00005
chrX_pilon	13634317	13634389	-	Name=tRNA_RF00005
